# Supplementary material for: IL-17A exacerbates psoriasis in a STAT3 overexpressing mouse model
Source: PeerJ. 2023 Jul 14;11:e15727. doi: 10.7717/peerj.15727 (PMC10351506; doi:10.7717/peerj.15727)
Supplement: Supplemental Information 4 [file peerj-11-15727-s004.xls]

## Sheet: Figure 1
	wt	stat3	il-17+stat3
1	13.5711	20.4155	26.1828
2	14.0504	22.4808	26.4988
3	14.2561	22.7829	28.4466
4	14.8177	22.926	29.3418
5	14.8305	23.1454	29.3418
6	16.4839	23.1967	30.3184
7	17.8998	23.5906	30.6985
8	18.0011	23.9036	30.93
9	18.1531	23.9409	31.652
10	18.3408	24.1018	33.1118
11	18.5471	24.2003	36.2738
12	18.6698	24.3472	36.3751
13	18.7613	24.3838	36.5595
14	19.1229	24.6867	36.6569
15	19.1626	24.7228	37.7697
16	19.2925	24.8667	38.8308
17	19.5223	24.9741	39.3555
18	19.7398	24.9741	39.4461
19	20.6904	25.4575	40.4801
20	20.8336	25.5507	40.5241
21	20.9463	25.632	41.2224
22	21.1001	25.7362	42.2129
23	21.1181	26.3977	43.4621
24	21.1181	26.4988	43.7348
25	21.1991	26.9328	44.0126
26	21.2707	26.988	45.0474
27	21.4134	26.988	45.5527
28	21.6256	27.0869	45.5527
29	21.9053	27.1198	46.5533
30	21.9319	27.5872	47.664
31	22.0438	27.759	47.8072
32	22.1128	27.8553	48.4251
33	22.2415	28.5405	48.6236
34	22.6819	28.7894	48.6272
35	22.8241	28.9028	48.7006
36	22.9571	28.9028	49.6437
37	23.4896	29.2606	52.0915
38	24.0578	29.3113	52.2178
39	24.0657	29.3113	52.2634
40	24.1919	29.3418	52.5527
41	24.4423	29.5538	52.7785
42	24.4423	30.0723	53.2941
43	24.582	30.0723	54.5021
44	24.6901	30.2988	54.7958
45	24.8464	30.7855	55.7105
46	24.9965	30.93	56.8148
47	25.561	31.0451	56.8724
48	25.7611	31.1884	56.9246
49	26.0257	31.3121	57.8134
50	26.186	31.4542	58.2944
51	26.3526	31.6145	58.4158
52	26.6969	31.6239	58.5619
53	27.4003	31.8767	58.9766
54	27.7864	32.3855	59.7785
55	28.1943	32.3855	60.0506
56	28.3088	32.7325	60.0902
57	28.4362	34.0065	60.3863
58	28.4362	34.9379	61.3969
59	28.7026	35.7703	61.3969
60	29.019	36.6569	62.5007
61	29.1759	39.0217	62.8375
62	29.6674	39.4084	63.0911
63	30.1008	39.694	64.004
64	31.5146	41.0489	64.4213
65	32.1304	42.2129	65.669
66	32.3952	42.4657	66.3177
average	22.9529	29.0628	48.0372
stdev	4.57825	5.08479	11.3523

## Sheet: Figure 2A
group	group	WT	WT	WT	STAT3	STAT3	STAT3	STAT3+IL-17A	STAT3+IL-17A	STAT3+IL-17A			heatmap
Name	Gene name	WT1	WT2	WT3	STAT3-1	STAT3-2	STAT3-3	STAT3+IL-17A-1	STAT3+IL-17A-2	STAT3+IL-17A-3			http://www.bioinformatics.com.cn/
ENSMUSG00000000037	Scml2	0.781658	1.0401	0.834823	1.05767	0.644729	0.988779	0.448907	0.45104	0.375084
ENSMUSG00000000085	Scmh1	2.24244	2.7486	2.79984	2.51203	2.54904	2.36727	2.12183	1.24728	1.50932
ENSMUSG00000000120	Ngfr	2.78795	2.9973	2.39857	3.15801	1.98748	10.2455	1.48905	1.53539	1.19763
ENSMUSG00000000125	Wnt3	9.60416	7.4524	7.67181	4.70434	7.64111	7.25726	4.31837	3.61508	6.65584
ENSMUSG00000000184	Ccnd2	14.3849	24.2693	18.5578	18.9834	18.4225	17.9402	13.6167	12.2042	11.119
ENSMUSG00000000202	Btbd17	0.815994	1.09143	0.999988	0.160748	0.158648	0.673775	0.482016	0.313375	0.212085
ENSMUSG00000000204	Slfn4	8.53753	4.51245	2.18698	24.5947	21.6524	11.7421	77.108	259.721	13.8916
ENSMUSG00000000214	Th	2.46819	1.0613	1.55167	1.00105	1.0283	0.732619	2.03689	1.27779	0.419287
ENSMUSG00000000216	Scnn1g	1.32498	1.32593	0.707548	1.83239	1.53522	1.60444	2.26897	2.35362	1.85329
ENSMUSG00000000223	Drp2	2.49715	2.67136	3.14608	2.00515	3.53044	4.29401	1.32437	0.930339	2.22224
ENSMUSG00000000247	Lhx2	4.70779	10.4963	2.34798	7.08062	3.2748	5.15976	1.71935	1.51567	2.00881
ENSMUSG00000000253	Gmpr	11.7557	14.5913	17.2608	16.0961	15.0238	12.7457	8.61669	2.07166	11.2933
ENSMUSG00000000290	Itgb2	13.4648	14.2775	13.7536	23.1266	16.3779	28.8533	25.8736	67.4543	20.612
ENSMUSG00000000305	Cdh4	6.22263	7.93435	10.5138	5.25271	7.31008	2.90432	4.56047	1.23538	4.15506
ENSMUSG00000000308	Ckmt1	74.6962	39.2531	35.6234	53.0706	45.5209	34.36	70.434	76.9416	64.8502
ENSMUSG00000000325	Arvcf	9.89081	10.5986	11.5253	8.07151	9.64685	7.18358	5.98903	4.08459	7.81062
ENSMUSG00000000386	Mx1	1.3698	1.76324	1.21365	4.66675	2.85902	6.65821	5.88064	19.2694	2.32929
ENSMUSG00000000392	Fap	7.05733	7.66746	7.85242	12.4121	9.01062	13.7528	9.40137	4.69413	9.36887
ENSMUSG00000000402	Egfl6	0.991876	1.41832	0.915549	1.37069	0.532477	0.808137	0.79579	0.265318	0.359123
ENSMUSG00000000416	Cttnbp2	2.99311	2.77372	2.88759	2.66432	2.10105	3.13362	1.15775	0.755626	1.61527
ENSMUSG00000000435	Myf5	0.192176	0.606744	0.421726	0.605731	1.00881	0.514248	0.218527	0.301364	0.330216
ENSMUSG00000000567	Sox9	3.20436	4.16311	1.94096	3.05136	1.5528	2.56979	2.18164	1.52896	1.14485
ENSMUSG00000000594	Gm2a	29.7293	22.007	30.806	27.3626	31.5404	36.9708	38.2827	46.262	41.1671
ENSMUSG00000000682	Cd52	11.2246	10.1616	10.8954	18.7834	14.5292	18.5168	20.2746	52.3193	14.2732
ENSMUSG00000000693	Loxl3	1.8462	3.14787	1.83182	4.55102	3.27607	4.30771	4.04925	9.2566	3.57417
ENSMUSG00000000730	Dnmt3l	0.683357	0.391563	0.753392	2.37355	0.839116	1.92485	1.89617	2.9409	1.1633
ENSMUSG00000000805	Car4	0.382456	0.208189	3.30629	0.470891	0.650632	0.886962	4.74433	8.7107	2.12614
ENSMUSG00000000876	Pxmp4	45.0108	38.4713	29.8364	32.7423	24.6683	40.4198	22.9384	16.6075	28.1154
ENSMUSG00000000901	Mmp11	8.293	4.99048	4.43276	10.719	7.94267	2.69667	14.8125	7.64296	10.6989
ENSMUSG00000000958	Slc7a7	2.01834	2.4822	1.69636	3.66313	2.97941	5.36089	5.81499	16.1813	3.23009
ENSMUSG00000000982	Ccl3	2.29939	1.76372	0.0521276	14.8761	9.8047	0.671234	29.118	14.8682	4.33135
ENSMUSG00000000983	Wfdc18	61.6208	47.9189	61.9281	118.242	96.204	104.688	181.617	188.592	177.533
ENSMUSG00000001025	S100a6	195.503	150.383	131.854	187.988	139.339	168.372	249.945	269.585	191.848
ENSMUSG00000001056	Nhp2	38.9788	31.2814	25.9287	31.9625	27.8365	30.7285	38.6763	52.289	42.1666
ENSMUSG00000001123	Lgals9	9.63889	10.5512	12.0577	12.7886	14.4391	14.9965	21.3984	30.8561	12.4578
ENSMUSG00000001128	Cfp	37.9516	42.9536	47.8336	52.1197	50.8183	72.5427	79.5921	115.174	79.279
ENSMUSG00000001131	Timp1	11.1069	12.2895	5.65257	22.9521	12.5159	8.00654	48.1764	146.906	36.4288
ENSMUSG00000001156	Mxd1	20.1762	14.3442	13.0519	19.0275	21.6118	16.6741	27.6926	34.6485	23.5057
ENSMUSG00000001240	Ramp2	8.86622	11.7416	13.1999	18.2917	16.4446	25.8263	18.7412	9.8818	20.8213
ENSMUSG00000001270	Ckb	71.9453	74.2286	70.3918	33.2299	34.5072	31.7346	40.879	38.4915	29.4561
ENSMUSG00000001300	Efnb2	20.0657	19.7182	13.7378	14.7735	11.8556	14.7343	13.5615	12.0682	11.2578
ENSMUSG00000001334	Fndc5	1.9269	3.40698	2.83251	3.41064	2.18301	2.14003	2.06681	0.714043	1.24473
ENSMUSG00000001349	Cnn1	6.74498	8.926	8.29622	3.87966	4.35482	7.14722	4.61343	3.57876	4.81843
ENSMUSG00000001504	Irx2	19.4009	20.637	12.2709	14.7078	11.9267	12.4791	13.3391	12.1725	15.6761
ENSMUSG00000001506	Col1a1	2114.45	4557.97	5725.07	2016.66	3449.58	354.786	2408.48	823.104	1065.6
ENSMUSG00000001507	Itga3	11.3751	10.2002	6.9188	6.64958	7.59641	7.02765	11.1843	22.3336	10.0155
ENSMUSG00000001508	Sgca	9.17169	9.20155	11.9511	13.5624	10.9474	10.6621	7.15288	1.66455	6.9704
ENSMUSG00000001542	Ell2	3.54939	2.82405	2.71598	3.47215	4.30356	2.93783	5.15693	4.69191	4.0127
ENSMUSG00000001604	Tcea3	15.3939	19.6872	29.5388	19.669	22.5972	18.4292	8.49989	2.04284	16.9656
ENSMUSG00000001739	Cldn15	2.18883	1.2144	1.93141	1.40967	1.43217	2.32032	4.93875	2.61677	2.80803
ENSMUSG00000001751	Naglu	7.49005	8.52893	9.17136	10.1346	9.97171	8.21794	13.9661	16.3591	9.53051
ENSMUSG00000001865	Cpa3	28.4787	28.8383	33.8978	49.5094	44.5413	47.8261	52.3875	26.0522	44.0136
ENSMUSG00000001870	Ltbp1	28.6411	22.8782	22.3082	20.7047	21.6999	14.8176	27.6659	20.4466	22.1745
ENSMUSG00000002028	Kmt2a	2.87528	3.80771	3.5978	2.68608	3.10698	3.08021	2.73612	2.11262	2.16186
ENSMUSG00000002032	Tmem25	0.427979	0.512534	0.540745	1.05388	0.984638	0.83984	0.545652	0.175775	0.475844
ENSMUSG00000002033	Cd3g	5.75216	4.94173	5.23029	7.43876	6.42861	7.83227	1.73938	4.38306	3.67829
ENSMUSG00000002103	Acp2	7.35953	7.60982	7.52113	8.62093	8.26588	9.59827	10.9407	16.8434	8.66405
ENSMUSG00000002111	Spi1	7.71785	7.14728	7.6186	11.0087	9.24597	13.2826	16.42	35.5302	10.3095
ENSMUSG00000002228	Ppm1j	3.25639	2.70957	4.77951	3.4366	3.43691	3.16187	1.99572	0.911885	1.88082
ENSMUSG00000002289	Angptl4	25.4631	20.4272	52.8386	12.9795	7.41826	16.9536	54.4744	55.8244	41.8925
ENSMUSG00000002297	Dbf4	6.61617	6.42284	3.15847	7.46892	4.74679	4.1206	7.44239	11.8724	7.2601
ENSMUSG00000002324	Rec8	3.92239	3.25261	2.57788	1.33597	1.92432	2.11881	0.852632	1.06759	2.26019
ENSMUSG00000002325	Irf9	14.6797	15.5566	15.4105	18.1816	18.3906	21.8723	22.9763	37.0804	18.5181
ENSMUSG00000002341	Ncan	0.7956	0.805597	0.95454	0.0438408	0.0216339	0.0416859	0.0517623	0.0186958	0.0562351
ENSMUSG00000002475	Abhd3	15.2409	14.0605	11.5393	15.414	8.86573	10.7009	7.95141	5.1192	8.90888
ENSMUSG00000002500	Rpl3l	16.3906	27.8284	27.5588	19.643	30.9048	25.5836	12.6099	3.19578	19.0094
ENSMUSG00000002565	Scin	22.9089	17.6798	17.7317	15.6927	12.3174	27.1246	11.8686	10.6595	14.2526
ENSMUSG00000002699	Lcp2	1.91828	1.75722	2.09047	3.08809	3.0313	3.90753	4.57751	8.94502	2.77599
ENSMUSG00000002797	Ggct	41.9369	19.6771	17.586	22.371	40.8415	20.778	47.6448	40.6608	60.3064
ENSMUSG00000002799	Jag2	20.5916	20.4896	13.0154	13.9127	12.9515	14.9389	13.7884	15.1287	15.0408
ENSMUSG00000002808	Epdr1	11.0506	12.275	12.8575	15.7894	12.4432	15.9576	9.98587	4.80714	12.0915
ENSMUSG00000002885	Cd97	10.0194	12.3892	12.5075	15.5667	10.8439	21.3223	15.628	23.7046	14.7305
ENSMUSG00000002992	Apoc2	0.629948	0.872866	1.71372	2.14351	2.17117	2.88099	6.86724	12.1879	3.64672
ENSMUSG00000003062	Stard3nl	13.9518	15.0611	16.5885	19.6857	18.198	21.077	22.6987	29.2111	22.7297
ENSMUSG00000003153	Slc2a3	2.84585	1.85681	2.03753	3.94586	5.74504	2.40929	11.173	6.79744	4.04913
ENSMUSG00000003227	Edar	0.792462	1.37801	0.395235	1.23589	0.567072	1.06028	0.136534	0.147942	0.244747
ENSMUSG00000003271	Sult2b1	38.8224	22.4298	17.2705	20.6235	28.3456	20.1486	39.0224	36.9835	48.9401
ENSMUSG00000003283	Hck	3.69658	5.77604	4.22224	10.1309	6.05122	9.32796	12.9093	41.6635	6.81452
ENSMUSG00000003469	Phyhip	9.69129	10.7575	7.02935	6.94125	6.0634	7.78669	4.45984	3.79797	6.29169
ENSMUSG00000003476	Crhr2	2.29974	2.19682	2.42716	2.07523	2.25003	3.17621	1.94789	0.349004	1.33471
ENSMUSG00000003484	Cyp4f18	4.11888	3.50329	4.04433	9.27624	6.27712	6.38344	15.723	21.8667	6.96036
ENSMUSG00000003541	Ier3	17.7581	12.3837	9.08486	19.4894	16.4316	11.5153	36.5296	40.0942	17.4467
ENSMUSG00000003585	Sec14l2	8.61162	5.88037	5.2663	5.88967	6.24162	5.3905	8.66627	14.2475	8.42749
ENSMUSG00000003721	Insig2	54.6672	43.344	37.4517	49.192	33.362	48.9466	30.182	24.3127	36.4358
ENSMUSG00000003865	Gys1	22.4468	24.0025	21.97	26.0485	29.6162	25.1715	20.8693	7.34802	16.3199
ENSMUSG00000003872	Lin7b	1.56165	1.50181	2.05101	1.61511	0.936162	1.50438	0.860984	0.437308	0.999691
ENSMUSG00000003934	Efnb3	0.402441	0.670898	0.514332	0.681311	0.562376	0.551911	0.20801	0.126782	0.394061
ENSMUSG00000003949	Hlf	1.4332	1.70709	1.92501	1.99173	1.2277	1.93655	1.3202	0.556311	1.02551
ENSMUSG00000003955	Fam162a	21.3365	16.5493	12.2746	21.8649	22.6403	14.598	25.3227	30.9135	26.1418
ENSMUSG00000004070	Hmox2	9.06836	8.24606	8.365	10.4294	9.81455	11.0839	12.4366	16.3683	11.2698
ENSMUSG00000004451	Ralb	18.6424	18.7728	18.9967	24.6153	19.8905	23.2299	27.2439	43.9572	24.4464
ENSMUSG00000004473	Clec11a	8.99941	26.1002	18.1754	17.86	13.5767	6.37946	8.41415	4.78279	9.24613
ENSMUSG00000004530	Coro1c	52.9419	39.8358	37.2533	37.7351	42.102	37.2381	52.4998	72.3122	47.6123
ENSMUSG00000004558	Ndrg2	113.911	114.802	131.877	139.364	147.826	132.911	89.1698	27.1277	105.646
ENSMUSG00000004707	Ly9	1.89855	2.41727	2.10241	6.51344	3.2689	3.49597	5.57181	11.3358	3.51271
ENSMUSG00000004730	Emr1	36.5763	48.3755	45.7008	78.3969	54.3117	64.4093	85.083	122.453	70.4237
ENSMUSG00000004846	Plod3	14.8039	20.4485	18.7353	21.8304	18.3181	28.2686	24.488	34.7363	22.9074
ENSMUSG00000004885	Crabp2	37.1845	27.0909	24.915	38.7575	28.4196	27.8179	50.4256	57.1417	43.718
ENSMUSG00000004892	Bcan	1.18523	1.26261	1.00428	0.0125531	0	0.0409237	0.0922214	0.0571012	0.0257632
ENSMUSG00000004902	Slc25a18	0.854526	0.681362	0.864384	0.189678	0.0935995	0.180355	0.0622085	0.175256	0.218972
ENSMUSG00000004988	Fxyd4	0.767888	0.581564	0.432933	1.84157	1.42804	0.428828	4.5212	5.23554	1.07986
ENSMUSG00000005054	Cstb	84.9711	57.585	48.5546	75.0997	64.4935	57.7865	103.949	131.826	95.8121
ENSMUSG00000005268	Prlr	4.87642	3.67137	2.65795	2.46931	2.20513	3.86922	2.8507	1.90225	2.46445
ENSMUSG00000005320	Fgfr4	1.80642	3.00242	2.31842	2.45544	2.57554	1.25035	1.05818	0.445149	0.94945
ENSMUSG00000005355	Casp14	24.8264	10.9348	6.87244	32.6287	32.8946	8.79035	45.1976	28.1666	43.9872
ENSMUSG00000005413	Hmox1	28.9588	24.2669	28.4632	32.7641	29.1974	48.467	47.0109	80.7096	38.2033
ENSMUSG00000005481	Ddx39	19.1449	13.8867	9.703	15.1236	14.1031	13.9208	17.5235	33.0348	20.7367
ENSMUSG00000005583	Mef2c	14.5808	20.8649	17.3462	26.2637	23.3351	21.8469	13.8881	6.36965	16.3935
ENSMUSG00000005628	Tmod4	14.3239	21.4479	29.9268	25.563	29.897	25.7873	12.3181	1.47113	19.8572
ENSMUSG00000005716	Pvalb	268.24	841.117	1200.21	565.167	954.006	1099.25	186.867	48.0317	699.53
ENSMUSG00000005836	Gata6	3.16902	2.15297	2.32791	1.40344	1.21793	2.53743	1.65067	1.04564	2.06093
ENSMUSG00000005994	Tyrp1	1.3495	5.22724	2.11126	9.01081	2.54087	4.85033	1.45377	0.73193	1.29223
ENSMUSG00000006019	Dhx34	2.47345	2.43433	2.32907	2.82612	2.84048	2.824	3.72286	6.00657	3.21343
ENSMUSG00000006179	Prss16	0.51522	0.487756	0.178757	0.24271	0.609732	0.16784	0.671545	1.25458	0.679259
ENSMUSG00000006269	Atp6v1b1	0.64431	2.76058	0.601227	3.21412	1.01023	1.75749	0.193369	0.0465615	0.189071
ENSMUSG00000006273	Atp6v1b2	46.521	36.3703	37.2343	47.4796	43.7428	39.3734	58.169	81.7394	50.9715
ENSMUSG00000006344	Ggt5	3.15886	3.66633	4.79881	5.32877	4.78263	11.2024	7.57245	5.93782	6.25726
ENSMUSG00000006435	Neurl1a	4.14557	6.95353	6.05621	7.31998	8.65226	5.96296	4.0605	1.81597	4.6411
ENSMUSG00000006457	Actn3	70.5674	231.206	330.252	159.168	248.671	282.761	45.1169	17.4684	200.662
ENSMUSG00000006542	Prkag3	0.598499	2.30561	3.19162	3.04959	3.09925	2.08199	0.951836	0.348086	2.05912
ENSMUSG00000006589	Aprt	29.4704	26.6797	18.6625	33.3241	23.7947	24.4797	39.6012	65.4098	32.688
ENSMUSG00000006642	Tcf23	0.393266	0.19154	0.0206462	0.305812	0.543267	0.0553866	1.34799	2.07501	0.972826
ENSMUSG00000006731	B4galnt1	6.15955	5.99001	3.37321	6.18603	5.17897	4.49586	8.73955	13.2727	6.37504
ENSMUSG00000007030	Vwa7	1.0952	0.899306	1.05541	0.850203	1.02856	0.844425	0.76756	0.145546	0.609779
ENSMUSG00000007038	Neu1	8.76978	10.5165	9.99051	11.3953	11.3879	12.5909	16.994	20.172	12.0697
ENSMUSG00000007122	Casq1	49.2631	146.741	144.283	111.99	148.514	152.714	44.0248	8.66671	105.852
ENSMUSG00000007888	Crlf1	6.86301	5.81419	4.92989	2.86087	3.14227	3.35957	2.10658	3.20089	3.90643
ENSMUSG00000007989	Fzd3	2.39256	2.7976	1.88754	1.89143	1.47404	1.95228	1.4647	0.957125	1.27511
ENSMUSG00000008036	Ap2s1	50.6928	50.3244	48.1678	54.5757	49.0993	60.1971	67.1526	90.8165	67.8714
ENSMUSG00000008136	Fhl2	3.96974	5.35352	1.53281	10.8979	6.22425	3.42667	11.1726	11.7332	8.69799
ENSMUSG00000008226	Scrn3	5.86725	6.36132	7.74702	7.73334	6.96195	8.10586	5.55249	2.83206	5.80812
ENSMUSG00000008348	Ubc	63.7611	115.544	79.5545	107.339	119.581	116.676	155.882	142.788	130.347
ENSMUSG00000008475	Arpc5	71.6276	62.0904	62.0785	79.8037	74.3596	83.3363	92.5136	132.76	79.3241
ENSMUSG00000008575	Nfib	21.1504	25.6129	19.1812	20.0694	19.0455	21.3176	15.4455	10.8239	13.48
ENSMUSG00000008601	Rab25	56.8366	31.5371	32.0833	35.5675	40.6376	30.6585	51.8619	49.7058	56.5901
ENSMUSG00000008658	Rbfox1	2.52269	4.97982	6.12957	5.49753	6.06347	6.62686	2.20661	0.53823	4.9876
ENSMUSG00000008999	Bmp7	14.4196	12.2193	8.19267	7.92884	8.20693	7.65877	10.8019	8.00254	9.49239
ENSMUSG00000009097	Tbx1	1.88139	4.80235	1.67378	3.00509	1.85364	2.65328	2.03686	1.13912	0.82233
ENSMUSG00000009185	Ccl8	524.546	604.505	468.686	963.202	822.068	628.704	829.16	943.192	1141.54
ENSMUSG00000009281	Rarres2	114.109	89.621	146.284	99.1707	116.356	83.4332	198.214	310.568	191.778
ENSMUSG00000009356	Lpo	1.47754	0.595775	0.231991	1.21279	1.44963	0.248941	3.40835	9.9301	2.15719
ENSMUSG00000009772	Nuak2	5.76437	3.35238	3.4401	4.13704	4.64573	3.87602	6.93929	10.7751	6.16255
ENSMUSG00000009900	Wnt3a	3.14617	1.4206	1.66314	1.28527	1.28257	1.11735	2.45798	2.79328	1.83182
ENSMUSG00000010080	Epn3	10.5459	7.34646	5.73788	6.98076	9.28401	6.51232	10.917	13.1757	11.949
ENSMUSG00000010358	Ifi35	6.86234	7.61079	6.25139	9.5527	8.41813	12.3919	10.1824	18.8375	9.22468
ENSMUSG00000010601	Apol7a	0.636999	0.967249	1.00326	1.25487	1.27106	1.68661	0.190616	0.33798	0.643855
ENSMUSG00000011034	Slc5a1	7.75064	4.13945	2.08109	7.30777	5.81909	2.83839	10.2394	18.1714	8.72093
ENSMUSG00000011148	Adssl1	50.1585	47.7815	52.4844	43.7967	50.9829	47.36	35.1892	17.0607	30.5071
ENSMUSG00000011632	Pinlyp	11.0738	7.087	2.46296	7.84901	7.31001	2.24247	13.5745	16.2174	17.8861
ENSMUSG00000011752	Pgam1	53.1684	46.4494	36.3305	54.9917	48.5253	50.8009	61.6469	97.0905	61.2786
ENSMUSG00000011884	Gltp	152.333	94.9646	91.852	90.2417	129.298	82.3887	138.881	131.013	155.72
ENSMUSG00000012519	Mlkl	2.95038	3.98685	2.1148	5.85598	4.03553	5.58599	6.46771	13.7173	4.45073
ENSMUSG00000013236	Ptprs	14.4739	19.4126	12.698	14.3796	12.2756	13.9723	11.944	8.97792	8.67559
ENSMUSG00000013419	Zfp651	8.24803	11.5246	10.2826	9.55166	8.86943	6.40717	6.06419	3.24662	6.21598
ENSMUSG00000013707	Tnfaip8l2	6.40797	9.00993	9.2902	13.9779	10.7688	10.33	16.6812	25.5723	11.8263
ENSMUSG00000014453	Blk	0.388173	0.264127	0.435597	1.75241	1.32072	0.502047	0.234075	0.471033	0.147132
ENSMUSG00000014592	Camta1	3.24121	2.84572	2.17592	2.45292	2.36542	2.55363	1.73424	1.41069	1.93107
ENSMUSG00000014602	Kif1a	0.890728	1.17716	0.760205	0.713143	0.986278	0.780058	0.457929	0.570888	0.438121
ENSMUSG00000014813	Stc1	4.82332	1.58349	1.60018	0.842732	2.12088	1.12183	3.40512	2.41983	2.49707
ENSMUSG00000015224	Cyp2j9	6.5318	6.39821	8.82675	6.51642	6.64345	5.39183	3.48892	3.10335	5.48195
ENSMUSG00000015312	Gadd45b	14.5337	8.6389	11.7477	18.3674	14.4938	10.438	27.7169	31.0152	14.0991
ENSMUSG00000015340	Cybb	8.89563	10.6109	9.8564	19.9138	14.2652	14.4086	25.5584	36.5541	12.7718
ENSMUSG00000015354	Pcolce2	48.013	44.8968	56.8266	34.9071	45.9901	24.2717	36.3926	16.4078	41.9564
ENSMUSG00000015355	Cd48	18.5201	16.0672	20.1413	32.9369	23.2859	26.6719	29.1828	49.5567	22.5868
ENSMUSG00000015619	Gata3	8.15736	7.82736	6.41024	4.60478	6.57841	5.63125	4.26209	3.98464	4.25001
ENSMUSG00000015665	Awat1	69.9019	55.9579	36.7119	54.5227	35.0241	66.1051	27.3683	32.6431	42.7343
ENSMUSG00000015854	Cd5l	0.176951	0.513724	0.588356	1.76231	0.210243	2.46224	1.66662	3.7439	0.934025
ENSMUSG00000015947	Fcgr1	4.65397	5.75693	4.27213	11.4831	7.04931	13.8521	26.5325	111.759	9.37687
ENSMUSG00000015950	Ncf1	9.01537	10.1727	10.1987	15.65	12.0728	24.3916	22.3208	48.2391	18.9288
ENSMUSG00000016024	Lbp	27.8505	20.8611	23.7054	34.6395	32.2604	36.6795	84.1646	25.7831	33.2657
ENSMUSG00000016087	Fli1	6.78031	6.89572	8.0028	9.74443	7.48256	9.76263	10.6009	16.1084	8.85317
ENSMUSG00000016194	Hsd11b1	13.5901	8.78064	13.4821	10.1306	11.1012	9.84718	15.9864	18.4825	13.4123
ENSMUSG00000016206	H2-M3	6.84633	7.26791	8.65185	11.6632	9.66337	13.3783	12.0139	24.5617	10.4416
ENSMUSG00000016256	Ctsz	54.0346	56.1818	56.4289	79.2365	61.2927	80.1501	105.282	200.342	80.1683
ENSMUSG00000016262	Sertad4	2.52131	4.83944	3.24206	3.75461	4.29796	2.09759	2.70521	1.69985	1.50975
ENSMUSG00000016349	Eef1a2	31.3817	43.5941	50.6291	40.7857	54.9892	46.0794	25.6478	4.4514	32.1956
ENSMUSG00000016496	Cd274	2.63038	2.40646	2.23792	4.41974	3.65289	3.69086	5.99808	6.94492	2.74805
ENSMUSG00000016529	Il10	0.24446	0.16634	0.243846	0.93306	0.534696	1.21019	1.04242	3.25166	0.864819
ENSMUSG00000016763	Scube1	0.401206	0.709788	0.180089	0.582894	0.43877	0.450909	0.0622116	0.123584	0.121657
ENSMUSG00000017002	Slpi	4.32977	2.05138	0.339913	9.35878	8.2037	1.28734	24.9695	34.5552	7.94231
ENSMUSG00000017057	Il13ra1	52.2271	40.5519	37.7999	51.3579	46.5563	42.9164	57.9692	78.5764	55.1327
ENSMUSG00000017204	Gsdma	55.6108	31.7505	24.6814	39.6897	40.5414	28.1194	47.3772	43.5228	61.1074
ENSMUSG00000017390	Aldoc	5.8623	4.42692	4.55767	3.84952	3.03099	2.6145	3.49051	2.07616	2.99175
ENSMUSG00000017639	Rab11fip4	5.11287	6.02314	6.64566	3.80739	4.84522	6.80189	1.69433	2.17426	2.26732
ENSMUSG00000017697	Ada	2.18175	2.29781	1.70316	3.78409	2.69724	3.42675	5.76099	6.53455	5.53705
ENSMUSG00000017724	Etv4	5.34852	5.27703	1.86728	3.11154	2.89215	3.1129	3.78391	7.26405	4.44313
ENSMUSG00000017760	Ctsa	97.9432	68.0888	68.5928	91.9913	93.4151	86.5228	124.927	159.678	131.491
ENSMUSG00000017830	Dhx58	2.04135	2.54764	1.82101	4.23391	2.7911	5.95099	8.44091	25.5796	4.09309
ENSMUSG00000018168	Ikzf3	0.295467	0.226364	0.283809	0.614399	0.531903	0.702796	0.181	0.600628	0.486685
ENSMUSG00000018217	Pmp22	43.2734	58.0675	63.5461	61.1182	63.9727	77.53	46.6328	28.64	47.5236
ENSMUSG00000018293	Pfn1	89.8104	90.1832	80.4719	106.29	91.3166	119.735	135.821	218.774	104.43
ENSMUSG00000018334	Ksr1	5.19357	7.55599	6.87033	5.61214	7.31667	7.9558	3.92057	4.37947	5.26132
ENSMUSG00000018341	Il12rb2	1.1726	1.22854	1.10114	1.38696	1.13036	1.23936	0.537614	0.533074	0.897595
ENSMUSG00000018378	Cuedc1	6.36961	10.2785	10.6479	8.23304	9.00651	12.3152	5.40036	3.25715	6.92166
ENSMUSG00000018411	Mapt	1.03216	1.50956	1.11019	1.45762	1.39022	1.08482	0.842019	0.431811	0.804447
ENSMUSG00000018459	Slc13a3	0.374858	0.556511	0.441901	0.682516	0.38649	2.39526	1.15078	1.84495	1.45816
ENSMUSG00000018593	Sparc	2081.18	2903.86	3695.59	1963.31	2378.15	517.481	1847.5	968.964	1237.8
ENSMUSG00000018648	Dusp14	11.181	5.68494	4.2544	7.23411	9.12546	4.93856	11.6407	10.1241	12.8424
ENSMUSG00000018654	Ikzf1	2.03137	2.10181	2.69911	3.39078	3.51982	4.34031	4.76888	8.11143	2.79772
ENSMUSG00000018740	Slc25a35	0.727462	0.564155	0.616292	0.765618	1.26904	1.5893	0.700501	0.602761	0.604349
ENSMUSG00000018750	Zbtb4	6.67015	6.90616	8.50443	6.70988	7.03176	7.01789	5.76477	3.73302	5.54092
ENSMUSG00000018800	Abca5	9.12531	7.59992	12.5067	7.94404	7.95786	12.8298	3.96846	2.57027	5.30414
ENSMUSG00000018821	Avpi1	14.9441	10.0219	9.46189	10.3677	12.3117	8.45573	18.14	26.9181	19.5186
ENSMUSG00000018830	Myh11	24.7889	23.7076	20.3162	13.7009	16.5196	20.5841	15.1867	13.2799	16.0457
ENSMUSG00000018845	Unc45b	9.4408	16.0128	17.6415	18.2759	15.4274	16.0812	8.67498	2.38786	13.0196
ENSMUSG00000018868	Pnpla5	42.0032	34.2186	22.3196	36.3235	18.5882	38.1726	18.1456	15.941	21.2532
ENSMUSG00000018893	Mb	84.5365	114.398	100.63	223.627	139.664	68.5617	74.014	16.136	60.9989
ENSMUSG00000018899	Irf1	15.7866	16.8258	20.3453	20.4007	20.4242	24.1925	25.1475	33.6569	22.4095
ENSMUSG00000018907	Alox12e	57.5829	35.3398	31.3569	28.3591	33.0496	38.7782	13.7709	9.75639	22.0515
ENSMUSG00000018920	Cxcl16	11.5686	8.33189	7.88535	11.3073	10.0205	8.28684	13.1702	16.231	13.0423
ENSMUSG00000018924	Alox15	0.924844	0.604126	1.10702	2.48995	2.5623	3.67921	1.94397	3.33226	1.99424
ENSMUSG00000018927	Ccl6	53.5249	52.9929	75.8473	64.0377	65.9654	253.881	148.342	337.946	180.363
ENSMUSG00000018930	Ccl4	2.2511	2.45076	0.13017	13.0146	8.15069	2.44442	25.8674	17.4677	4.08899
ENSMUSG00000018965	Ywhah	24.0788	23.4117	21.0978	30.2971	24.3069	28.3666	31.3967	43.4251	28.2327
ENSMUSG00000019102	Aldh3a1	44.2238	37.5947	45.3078	27.4804	24.2926	35.0151	30.0129	21.3289	24.5449
ENSMUSG00000019124	Scrn1	6.31664	6.52355	8.07727	5.68077	6.60972	2.73473	5.03283	2.01355	4.44989
ENSMUSG00000019194	Scn1b	27.1125	53.3351	51.2655	51.4405	58.5262	52.2776	30.9973	10.5601	43.0424
ENSMUSG00000019359	Gdpd2	18.6997	15.2302	15.5256	13.0034	13.3082	14.822	9.62464	7.46429	13.8533
ENSMUSG00000019368	Sec14l4	39.3923	32.6531	22.0033	28.0616	19.1899	23.266	13.9809	16.6703	19.6208
ENSMUSG00000019528	Gyg	28.3104	29.8919	30.6973	32.6252	34.236	30.1778	22.9471	12.6061	23.4765
ENSMUSG00000019577	Pdk4	33.29	27.4146	40.1658	8.63593	8.22296	22.0073	30.7752	10.5584	24.9528
ENSMUSG00000019787	Trdn	19.5367	27.1934	32.8858	30.2514	32.7554	36.1333	12.1233	2.70706	22.9311
ENSMUSG00000019791	Hint3	7.49098	7.05237	7.93509	7.9966	8.1971	8.45188	5.75713	4.0636	6.03879
ENSMUSG00000019820	Utrn	20.2594	23.0048	25.2753	18.016	21.3566	24.498	15.4335	11.4289	17.4433
ENSMUSG00000019852	D10Bwg1379e	0.417505	1.34543	1.60474	0.956809	0.833369	0.163857	0.693425	0.12159	0.233506
ENSMUSG00000019872	Smpdl3a	40.5836	37.4934	50.7498	77.2044	54.9329	40.9437	61.2342	68.8736	56.438
ENSMUSG00000019874	Fabp7	29.8243	32.1404	33.0297	0.409558	0.220476	0.44506	0.35168	1.1432	0
ENSMUSG00000019878	Hsf2	12.4761	12.4967	13.5118	12.1606	12.2546	14.2359	7.57681	6.20196	10.3016
ENSMUSG00000019880	Rspo3	2.57505	2.83986	2.21832	2.40463	1.39791	2.07613	1.91867	0.318403	1.6056
ENSMUSG00000019899	Lama2	35.1668	35.227	37.4168	25.4577	34.1358	25.2192	24.1547	9.79871	26.9567
ENSMUSG00000019932	Kera	1.78553	3.21893	0.957548	2.15585	1.67974	2.48657	0.635105	0.494623	1.20316
ENSMUSG00000020007	Il20ra	4.23422	3.77531	5.35808	3.76271	3.25084	4.83651	1.46329	2.30563	2.83653
ENSMUSG00000020032	Nuak1	9.81876	9.75589	7.48284	8.31584	8.63027	7.28963	5.08827	2.96105	5.70623
ENSMUSG00000020038	Cry1	3.09458	3.73055	2.98082	3.58448	3.8475	3.92362	5.18979	7.55742	4.21527
ENSMUSG00000020042	Btbd11	4.19115	3.96807	2.6698	2.4456	3.012	2.4355	3.23156	3.40861	2.57951
ENSMUSG00000020044	Timp3	63.1482	53.7332	67.4121	55.4365	61.5685	117.036	48.2954	20.3493	49.2698
ENSMUSG00000020053	Igf1	10.7682	14.7639	15.118	17.3775	25.2179	17.6869	11.7418	6.92418	13.9021
ENSMUSG00000020061	Mybpc1	103.918	80.6057	64.1235	116.368	100.041	82.3131	83.4878	16.4188	49.8156
ENSMUSG00000020062	Slc5a8	5.98605	3.51225	2.32493	4.67904	3.86263	2.85911	9.72187	12.1172	7.62106
ENSMUSG00000020077	Srgn	20.7412	16.8708	17.0788	53.4975	38.4716	27.7915	84.7337	137.138	30.7347
ENSMUSG00000020120	Plek	12.804	10.0143	8.75056	25.4193	20.8093	15.2447	38.8962	72.5581	15.0749
ENSMUSG00000020140	Lgr5	5.74046	4.66873	4.2437	3.88103	3.0626	1.45429	4.55595	2.54917	2.45479
ENSMUSG00000020142	Slc1a4	3.64005	3.96291	3.09186	4.3085	3.52863	4.08172	2.47696	1.78167	2.44251
ENSMUSG00000020159	Gabrp	1.02517	1.06295	1.98431	0.913606	1.00844	1.21487	0.227091	0.328088	0.937515
ENSMUSG00000020176	Grb10	10.8045	15.7928	14.304	19.3524	17.5386	23.2649	19.8688	13.8122	19.555
ENSMUSG00000020183	Cpm	15.5363	7.07932	6.37231	7.63591	14.6159	8.162	20.3233	16.898	21.186
ENSMUSG00000020186	Csrp2	10.8154	13.4979	12.2355	28.1916	12.5974	26.2589	14.9981	14.8477	20.2306
ENSMUSG00000020251	Glt8d2	6.22279	11.7407	12.5418	8.78251	7.91277	3.93537	7.1238	1.06811	4.71981
ENSMUSG00000020277	Pfkl	22.1401	19.0681	16.0361	23.6047	21.4601	25.9954	27.114	37.9386	28.3771
ENSMUSG00000020326	Ccng1	66.5311	86.2436	117.981	94.655	108.31	125.796	56.1684	46.524	89.8165
ENSMUSG00000020376	Rnf130	33.2301	34.0405	41.8528	44.1422	40.737	46.2051	53.828	75.3855	43.0122
ENSMUSG00000020390	Ube2b	22.5105	27.5913	32.5526	30.5247	31.2439	27.2996	20.9411	15.0882	23.2909
ENSMUSG00000020399	Havcr2	1.34214	1.20658	1.1055	2.08313	1.55182	1.45835	2.58566	4.74923	1.62379
ENSMUSG00000020407	Upp1	3.04068	2.32068	2.03245	5.40339	3.16919	2.55002	9.20299	11.6574	3.13677
ENSMUSG00000020411	Nipal4	11.8167	7.67513	8.51443	6.49848	9.98672	8.3681	9.92225	12.9707	13.2863
ENSMUSG00000020427	Igfbp3	47.9657	50.9574	60.6283	45.8244	73.7991	31.5524	26.9781	21.9757	42.3198
ENSMUSG00000020431	Adcy1	2.24005	3.18885	2.29631	2.36402	1.6443	2.22991	1.79918	0.731523	1.08257
ENSMUSG00000020439	Smtn	10.3101	16.1228	12.0812	11.3656	11.2889	9.94789	9.38786	8.20611	8.46015
ENSMUSG00000020538	Srebf1	35.8495	45.0002	32.8708	32.1378	41.2675	55.2159	25.3157	28.8599	29.7694
ENSMUSG00000020571	Pdia6	84.2772	88.9333	64.467	97.8667	78.9335	116.575	97.2491	190.408	121.879
ENSMUSG00000020599	Rgs9	0.459424	0.829236	0.615046	0.607338	0.376094	0.375284	0.224965	0.17605	0.232184
ENSMUSG00000020601	Trib2	4.96331	7.7475	5.79656	6.74671	5.1768	5.64905	4.25431	2.79575	3.36053
ENSMUSG00000020638	Cmpk2	2.9666	4.12915	3.09649	7.98943	5.12282	8.80255	8.06141	14.0629	5.0102
ENSMUSG00000020641	Rsad2	2.90105	1.92002	1.64466	9.04531	5.1838	6.10985	14.4553	27.9248	5.34771
ENSMUSG00000020653	Klf11	6.39781	5.85157	7.82034	4.41866	3.40722	3.69774	6.34498	5.56961	5.04282
ENSMUSG00000020709	Adap2	5.15296	5.62183	5.80009	6.89211	6.63331	6.30514	11.9882	20.7424	7.77425
ENSMUSG00000020733	Slc9a3r1	17.2664	16.5688	11.7715	16.1338	15.7035	17.0664	22.1488	32.541	18.7722
ENSMUSG00000020790	Ankfy1	16.8297	16.0484	13.5652	18.0648	16.9467	19.6467	20.9688	29.3043	18.1899
ENSMUSG00000020803	Txndc17	27.0179	21.342	23.494	27.6683	25.4087	23.9422	33.1795	40.1488	34.3926
ENSMUSG00000020810	Cygb	12.9584	22.6927	22.044	34.2677	29.0512	22.1852	20.7684	9.47032	20.7298
ENSMUSG00000020811	Wscd1	1.72027	1.6053	1.67509	1.2641	1.02196	0.818362	0.70568	0.627008	1.03499
ENSMUSG00000020839	Tmigd1	7.28436	3.87983	3.66656	5.03353	6.12253	4.51022	10.2642	12.9545	12.1202
ENSMUSG00000020840	Blmh	141.44	57.5009	47.876	74.4142	111.565	64.3916	134.21	143.986	188.66
ENSMUSG00000020866	Cacna1g	3.60589	5.63584	3.42931	3.10413	3.72622	2.1836	1.29699	0.929529	2.08197
ENSMUSG00000020882	Cacnb1	4.3335	6.13472	5.9198	7.3154	5.83544	5.55736	3.71901	1.473	4.62118
ENSMUSG00000020902	Ntn1	14.8592	19.3151	17.1166	15.5912	18.1178	11.4956	11.5239	7.49808	12.7142
ENSMUSG00000020911	Krt19	3565.69	2236.51	1322.34	3930.83	2579.78	1460.28	5711.17	8085.25	4012.33
ENSMUSG00000020932	Gfap	0.544219	0.460826	0.407139	0.0595609	0.0881737	0.0970856	0.0468819	0.016933	0.0305598
ENSMUSG00000021009	Ptpn21	13.0529	10.6884	13.3748	8.56442	11.4146	13.0609	6.29257	3.70206	9.63429
ENSMUSG00000021036	Sptlc2	14.2642	11.574	11.5326	14.7669	12.6253	16.2002	16.1146	24.7983	15.2136
ENSMUSG00000021061	Sptb	6.15437	7.09019	7.62945	6.89273	8.10178	6.28237	4.36344	1.62634	5.99872
ENSMUSG00000021091	Serpina3n	100.821	87.6428	81.8055	118.034	95.63	79.5676	263.298	226.317	196.651
ENSMUSG00000021118	Plek2	22.0017	13.4547	10.6944	12.7432	12.829	11.8391	19.38	25.4943	20.7048
ENSMUSG00000021190	Lgmn	61.2496	64.0239	53.0325	102.364	77.0586	90.9577	201.387	415.319	105.451
ENSMUSG00000021203	Otub2	9.88543	5.86536	5.89886	7.37988	11.2053	6.63828	12.6798	11.4518	15.2347
ENSMUSG00000021214	Akr1c18	6.03606	3.89954	4.59837	15.7783	11.6387	149.344	15.2565	7.31833	12.6378
ENSMUSG00000021242	Npc2	79.852	77.6332	88.1124	92.7876	92.1955	86.3643	124.08	173.566	114.894
ENSMUSG00000021263	Degs2	6.08452	4.08449	1.47533	9.43982	7.76176	4.56916	12.9526	13.0112	13.3696
ENSMUSG00000021322	Aoah	2.91244	2.9237	3.11892	3.83737	3.34599	3.84612	5.43493	9.3208	4.72791
ENSMUSG00000021373	Cap2	11.6379	13.7724	12.8683	16.5781	13.25	13.0045	10.0724	3.28028	11.0259
ENSMUSG00000021384	Susd3	3.04967	3.70902	4.0012	5.54771	3.68575	4.1759	8.35006	15.9721	5.72066
ENSMUSG00000021423	Ly86	14.3105	17.2123	14.3721	32.8792	21.2633	23.5171	38.7189	65.7245	21.285
ENSMUSG00000021448	Shc3	0.57852	0.60359	0.512947	0.18203	0.0859201	0.120405	0.132898	0.117002	0.0649718
ENSMUSG00000021451	Sema4d	3.1617	3.69495	3.26066	5.60385	5.55666	4.38796	7.70932	10.0242	4.85679
ENSMUSG00000021457	Syk	7.29538	9.40307	9.98967	11.5431	10.1797	13.4906	16.7099	27.0007	11.1561
ENSMUSG00000021466	Ptch1	2.99297	8.85805	2.82909	7.16984	4.55711	5.73077	1.79764	1.65703	2.27755
ENSMUSG00000021477	Ctsl	271.154	217.816	234.109	314.574	262.428	240.779	413.013	424.591	372.896
ENSMUSG00000021486	Prelid1	74.8386	64.4595	56.1079	73.0478	68.8705	65.0719	93.5219	118.725	80.8503
ENSMUSG00000021494	Ddx41	13.1502	13.6675	10.3583	14.6167	11.5599	14.2351	17.7029	24.0055	14.3799
ENSMUSG00000021509	Slc25a48	2.00664	1.27065	1.04165	1.38154	1.09477	1.12871	2.78343	2.43115	1.74883
ENSMUSG00000021553	Slc28a3	2.88373	1.04014	1.15409	1.66627	2.39431	1.06015	3.23474	3.36756	3.05652
ENSMUSG00000021567	Nkd2	8.62723	5.95337	5.6929	5.40366	4.67071	3.52324	4.2808	2.66614	3.82789
ENSMUSG00000021569	Trip13	3.44328	3.78714	1.5676	4.17425	2.30017	2.13574	3.85152	6.44791	4.15856
ENSMUSG00000021591	Glrx	57.4691	28.0263	18.4781	66.107	57.9156	24.2496	98.28	107.541	92.7594
ENSMUSG00000021614	Vcan	4.45175	10.2438	4.86149	11.8412	7.6375	9.97479	11.9178	16.4641	8.55979
ENSMUSG00000021622	Ckmt2	66.0912	73.194	98.9929	88.586	77.91	64.937	61.4935	17.1366	48.9715
ENSMUSG00000021624	Cd180	0.740184	1.1512	1.05475	1.83012	1.9971	1.77856	3.56033	7.61412	0.732882
ENSMUSG00000021662	Arhgef28	3.46488	3.89456	4.80751	3.20993	2.62178	4.34352	3.18812	1.57341	2.73233
ENSMUSG00000021670	Hmgcr	53.75	34.8456	20.6157	34.4702	27.5741	24.7834	43.5413	46.5374	37.6806
ENSMUSG00000021676	Iqgap2	7.82886	8.51573	9.96345	11.3386	9.56196	9.4763	13.1306	16.2669	10.4039
ENSMUSG00000021748	Pdhb	38.9129	40.8473	37.6612	44.4017	42.1984	62.1389	31.4741	29.4949	37.2323
ENSMUSG00000021751	Acox2	23.6023	20.2538	11.9501	17.4563	10.8429	15.7121	9.49473	10.3498	13.8072
ENSMUSG00000021763	BC067074	1.02399	1.05804	1.66926	1.01795	1.00926	0.786511	0.921322	0.355778	0.651672
ENSMUSG00000021768	Dusp13	5.16151	6.49344	8.85548	7.36616	9.38842	8.02923	4.64796	1.61882	5.95904
ENSMUSG00000021798	Ldb3	27.6978	33.7947	31.5917	31.0119	35.7619	35.0817	23.8898	5.56564	26.3375
ENSMUSG00000021822	Plau	23.1593	20.9083	22.3574	31.6233	32.8957	37.4522	31.9824	55.3676	29.9282
ENSMUSG00000021835	Bmp4	6.18686	7.30572	6.36477	6.99182	5.46757	6.45613	4.47092	2.15069	4.25391
ENSMUSG00000021871	Pnp	33.7169	33.2412	38.0568	43.0881	37.4193	78.5725	49.089	88.0161	54.8605
ENSMUSG00000021886	Gpr65	0.990192	0.867675	0.433626	1.90307	0.95084	1.52518	2.89605	9.58993	1.782
ENSMUSG00000021939	Ctsb	196.418	198.813	197.416	299.967	237.089	259.985	398.643	525.329	294.259
ENSMUSG00000021953	Tdh	11.6484	4.03111	0.538949	8.45249	9.57788	1.51385	12.2221	10.5377	14.922
ENSMUSG00000021983	Atp8a2	0.472759	0.772038	0.840626	0.890829	0.689362	0.891044	0.223107	0.264773	0.498623
ENSMUSG00000021991	Cacna2d3	1.38856	1.123	1.30593	1.99296	1.38841	1.23148	0.451132	0.0888775	0.561404
ENSMUSG00000021996	Esd	57.3768	49.9674	56.1528	77.6683	58.836	61.0908	75.2146	114.014	64.6616
ENSMUSG00000021998	Lcp1	33.4229	33.3466	34.0562	52.2302	43.9593	49.2167	61.1505	131.189	40.2716
ENSMUSG00000022012	Enox1	2.67318	3.8274	2.98017	2.30115	2.66415	2.28422	2.07834	1.2581	2.24784
ENSMUSG00000022014	Epsti1	8.97416	8.93072	10.3403	14.219	12.7423	14.9472	20.8344	40.0645	16.1282
ENSMUSG00000022032	Scara5	36.2251	44.081	52.4388	30.6683	53.4919	28.0297	25.5689	7.67433	33.6308
ENSMUSG00000022103	Gfra2	2.55106	4.20883	4.34945	3.43152	4.40268	6.17085	2.85787	1.5861	2.81706
ENSMUSG00000022111	Uchl3	34.6109	20.9189	19.0127	27.5702	28.048	26.2356	35.8424	39.4236	44.694
ENSMUSG00000022122	Ednrb	14.7618	18.0704	20.7106	19.5713	17.3352	38.0565	29.6794	23.2118	26.3621
ENSMUSG00000022123	Scel	72.4427	58.127	57.9786	61.2297	49.6208	64.5163	42.6009	32.164	49.884
ENSMUSG00000022126	Irg1	1.74152	0.881233	0.0122334	6.00983	5.96109	0.971411	14.4846	6.95796	2.53502
ENSMUSG00000022129	Dct	5.02814	13.454	6.23406	17.84	6.04105	10.3091	3.4408	1.86415	2.95272
ENSMUSG00000022132	Cldn10	19.6201	19.5787	21.8976	13.6372	14.099	2.57727	12.3288	3.28705	9.05053
ENSMUSG00000022148	Fyb	2.67022	3.47512	3.79627	4.99574	4.90061	4.88672	7.13877	11.8177	3.55208
ENSMUSG00000022180	Slc7a8	1.10175	1.19948	1.42571	1.39806	1.70785	2.81539	2.83193	6.01481	1.87608
ENSMUSG00000022197	Pdzd2	8.87535	10.2219	9.9521	6.97104	9.29152	10.1076	6.19808	5.11458	7.16372
ENSMUSG00000022199	Slc22a17	3.01316	3.11827	2.93702	2.05384	2.43909	2.03567	2.33316	1.09081	1.84125
ENSMUSG00000022215	Fitm1	15.7909	25.039	34.5121	26.8476	28.1263	28.6724	19.0616	3.07937	21.7894
ENSMUSG00000022218	Tgm1	36.7881	23.67	23.003	22.4106	30.932	23.7672	35.7514	54.6648	40.0639
ENSMUSG00000022221	Ripk3	4.36176	6.08003	3.2326	6.00273	5.21099	6.82849	8.87038	21.4376	9.04402
ENSMUSG00000022225	Cma1	21.0049	22.5141	28.7907	41.2626	34.7498	40.2225	46.7255	27.4658	36.5793
ENSMUSG00000022229	Atp12a	10.7295	5.64755	4.42653	20.3683	7.66264	4.91261	12.9558	18.9069	14.2039
ENSMUSG00000022296	Baalc	0.857322	1.02311	0.394693	1.18548	1.44245	0.582354	2.19858	1.56972	1.13318
ENSMUSG00000022357	Klhl38	2.16948	2.70476	2.81556	2.47008	2.95937	1.96008	0.807847	0.130649	1.65051
ENSMUSG00000022358	Fbxo32	16.2164	17.037	20.2224	17.929	17.2976	15.8331	7.75418	3.73709	11.2236
ENSMUSG00000022378	Fam49b	7.96226	8.83361	7.01775	11.9425	10.4841	13.8525	14.0231	30.4273	10.4751
ENSMUSG00000022383	Ppara	2.92368	2.3844	2.73864	2.36369	2.05266	3.42665	1.57075	1.12684	2.08131
ENSMUSG00000022449	Adamts20	0.368701	0.854416	0.367774	0.560311	0.445463	0.7611	0.343027	0.0884974	0.271516
ENSMUSG00000022451	Twf1	36.172	28.5114	25.8461	36.1633	42.6413	30.6512	46.9899	47.3912	42.8986
ENSMUSG00000022464	Slc38a4	6.13894	8.44575	7.35227	6.56821	7.06627	9.99257	3.64137	2.38334	6.35936
ENSMUSG00000022468	Endou	34.8047	17.7358	10.8719	30.3277	25.8835	13.3531	41.3296	58.831	44.7035
ENSMUSG00000022488	Nckap1l	12.4411	12.8424	13.451	20.4628	16.615	23.4265	26.0726	59.392	17.1898
ENSMUSG00000022505	Emp2	55.4345	46.6366	40.7762	39.4018	39.9202	39.7731	31.2214	27.2918	40.0559
ENSMUSG00000022519	Srl	52.78	60.7982	68.4765	64.1627	68.1033	64.9617	36.9663	9.36681	46.0987
ENSMUSG00000022525	Hrasls	1.90557	2.91604	3.54902	3.20265	4.32666	3.5801	1.25355	0.298527	2.49178
ENSMUSG00000022587	Ly6e	30.8492	35.7659	36.9154	41.2624	41.6966	47.0967	58.7781	99.3757	49.5173
ENSMUSG00000022591	Gm9747	10.51	13.9472	11.5059	11.0944	10.6271	12.2174	8.33022	3.39892	7.77943
ENSMUSG00000022594	Lynx1	11.852	14.643	15.8207	15.3526	16.368	14.9926	9.22201	4.65365	13.0687
ENSMUSG00000022602	Arc	0.891019	0.955785	0.509741	0.606605	0.993549	1.45863	2.72262	6.41391	1.85419
ENSMUSG00000022629	Kif21a	14.4333	12.6528	16.1559	9.90832	11.4869	17.296	7.49906	6.79012	9.32402
ENSMUSG00000022651	Retnlg	1.90934	1.14687	1.31348	5.31777	2.04811	1.90275	11.5023	13.4221	2.26263
ENSMUSG00000022656	Pvrl3	2.81038	4.68032	5.54531	5.51907	3.82481	5.77186	2.13351	1.66251	2.52106
ENSMUSG00000022657	Cd96	0.769814	0.678458	1.20667	1.4804	0.908706	1.35369	0.43579	0.698038	0.555785
ENSMUSG00000022686	B3gnt5	0.291437	0.317287	0.243817	0.879705	0.438674	0.462886	1.07875	0.884558	0.646163
ENSMUSG00000022687	Boc	12.0356	11.5864	10.5717	10.1874	9.81421	8.29573	8.61346	5.31348	7.25449
ENSMUSG00000022758	P2rx6	1.29736	1.98856	2.40089	2.3708	2.97041	4.18422	0.652921	0.344178	2.34658
ENSMUSG00000022762	Ncam2	0.584221	0.501493	0.69482	0.509051	0.436868	0.553176	0.325195	0.27686	0.204407
ENSMUSG00000022769	Sdf2l1	13.8733	16.6772	14.2709	19.0029	18.2278	30.1245	23.8277	50.8684	29.6521
ENSMUSG00000022807	Osbpl11	13.0276	13.325	14.1698	15.2832	13.7749	17.8119	17.6693	30.5042	17.9032
ENSMUSG00000022822	Abcc5	15.3618	17.4144	18.0649	16.8818	17.2706	21.4199	12.3054	9.78411	12.2477
ENSMUSG00000022831	Hcls1	10.782	10.4197	10.8737	16.2333	12.9327	20.9985	21.4911	60.2742	16.7785
ENSMUSG00000022836	Mylk	14.3091	15.7144	13.28	11.2557	11.6581	13.6076	10.406	7.8626	10.9484
ENSMUSG00000022841	Ap2m1	53.3052	51.4731	44.0014	55.4105	50.9405	67.5078	66.2144	100.807	60.4895
ENSMUSG00000022876	Samsn1	3.83359	2.49034	1.92254	8.74121	6.79451	5.30488	13.9688	16.8442	5.28778
ENSMUSG00000022883	Robo1	4.74246	5.91798	5.66503	4.86415	4.13169	4.73057	3.17348	2.09876	2.99059
ENSMUSG00000022899	Slc15a2	1.96238	1.72254	3.38511	4.40551	0.456533	3.97353	0.283194	0.94562	0.440778
ENSMUSG00000022900	Ildr1	0.763235	0.730647	0.51192	0.71289	0.34539	0.633833	0.258462	0.383237	0.292619
ENSMUSG00000022902	Stfa2	4.16391	1.03028	0.188793	26.4726	13.5233	0.709054	66.4249	65.191	22.7654
ENSMUSG00000022906	Parp9	10.1768	10.5145	9.79112	14.9916	11.4395	18.3682	16.6901	28.9404	13.4795
ENSMUSG00000022947	Cbr3	24.7422	25.9597	15.757	26.1978	24.4012	20.8151	30.5873	32.741	38.8887
ENSMUSG00000022969	Il10rb	20.3239	22.427	24.5056	29.0253	26.9984	27.7866	38.5427	59.2601	27.2618
ENSMUSG00000022986	Krt75	16.0195	14.6248	6.40637	8.37843	4.27744	7.74029	5.95502	5.91717	3.79091
ENSMUSG00000022987	Zfp641	1.06978	1.45019	1.20478	1.51599	1.50289	1.10811	0.948911	0.278309	0.927817
ENSMUSG00000022995	Enah	5.41243	5.08811	2.84368	6.09325	5.20389	3.63712	8.17101	8.03005	5.7701
ENSMUSG00000022996	Wnt10b	0.986273	2.30857	1.19285	2.25865	1.76174	1.24042	0.739175	0.220948	0.872277
ENSMUSG00000023021	Cers5	75.3928	76.0947	60.2285	64.1458	45.7159	95.1822	29.1276	31.2656	41.157
ENSMUSG00000023031	Cela1	2.17053	1.43333	2.91044	2.90901	2.76722	4.60844	5.77496	7.09448	4.35183
ENSMUSG00000023041	Krt6b	209.13	147.105	15.3807	1392.03	472.971	45.9999	2059.55	3663.71	588.517
ENSMUSG00000023272	Creld2	20.2407	20.6497	18.4698	21.6613	18.1805	28.9339	26.847	53.1884	29.146
ENSMUSG00000023341	Mx2	0.712166	0.865489	0.792978	1.41926	1.17531	2.92502	2.73933	5.3799	1.33922
ENSMUSG00000023349	Clec4n	15.2159	9.47025	6.09282	21.756	14.8446	6.97579	24.5242	51.2835	20.837
ENSMUSG00000023809	Rps6ka2	4.3103	4.99462	5.28565	5.70982	6.47184	4.98665	4.30869	2.10331	3.86064
ENSMUSG00000023826	Park2	1.71273	1.66049	2.91804	2.06875	2.07817	2.06073	1.56374	0.54613	1.1878
ENSMUSG00000023861	Mpc1	15.443	14.2418	16.9178	17.0642	17.8139	28.6193	12.4395	8.46151	15.2562
ENSMUSG00000023903	Mmp25	0.381579	0.241526	0.283253	0.533183	0.603853	0.294449	0.587096	1.0735	0.421564
ENSMUSG00000023905	Tnfrsf12a	13.7778	13.044	8.49328	13.0849	10.983	12.0931	16.2307	24.6018	13.8878
ENSMUSG00000023912	Slc25a27	1.38371	1.56458	1.40444	1.15251	1.2696	1.48627	0.93854	0.543829	0.94712
ENSMUSG00000023992	Trem2	2.11199	2.61769	1.68535	17.6664	6.15928	5.0081	20.3211	32.5008	3.64545
ENSMUSG00000024013	Fgd2	5.72429	7.29708	7.93848	8.91977	7.81364	11.7447	10.4273	16.7775	8.80579
ENSMUSG00000024026	Glo1	36.9047	28.2681	28.5499	38.8466	33.4773	33.1689	37.5153	59.9808	42.7968
ENSMUSG00000024030	Abcg1	9.6598	8.45304	8.22185	14.4477	10.7174	10.9258	22.7848	31.8175	13.6833
ENSMUSG00000024039	Cbs	6.47668	7.34785	6.4604	5.2425	5.361	5.30227	1.88924	1.31086	3.59727
ENSMUSG00000024049	Myom1	68.9822	65.3468	77.4071	79.7129	81.6475	77.4929	43.5639	8.45583	58.466
ENSMUSG00000024076	Vit	2.32529	4.85479	4.35998	3.79797	4.106	3.84364	1.55179	0.725332	2.43957
ENSMUSG00000024085	Man2a1	25.8471	25.0664	21.2071	24.8781	27.0411	30.6383	29.8623	40.9006	35.3681
ENSMUSG00000024121	Atp6v0c	47.9612	39.6466	40.729	51.7993	43.5875	46.5927	66.3821	83.4498	50.8409
ENSMUSG00000024136	Dnase1l2	31.8035	17.3122	14.5116	19.1969	27.6588	16.9644	33.6238	32.1202	44.1407
ENSMUSG00000024140	Epas1	10.3375	10.2775	11.8834	9.00138	13.1717	10.508	15.9632	17.0943	13.1695
ENSMUSG00000024172	St6gal2	0.131983	0.603495	0.131651	0.474504	0.198868	0.296666	0.109149	0.036959	0.0733717
ENSMUSG00000024176	Sox8	0.533738	0.697295	0.798595	0.354864	0.246455	0.128541	0.275874	0.164409	0.175332
ENSMUSG00000024180	Tmem8	1.7912	2.51622	2.27083	3.50584	2.85339	4.18081	4.52755	15.999	3.00188
ENSMUSG00000024186	Rgs11	0.994356	1.26298	1.02191	1.73625	0.922688	0.886937	0.529528	0.405016	0.426388
ENSMUSG00000024210	Ip6k3	4.56349	4.43933	3.70393	6.03318	4.94226	5.75752	4.41255	1.516	3.84092
ENSMUSG00000024222	Fkbp5	13.8556	13.4316	14.909	18.1162	23.739	40.7257	24.7835	35.5614	31.6669
ENSMUSG00000024299	Adamts10	7.04001	10.4181	9.90957	8.35534	6.78154	8.01429	6.70177	4.54114	6.74661
ENSMUSG00000024300	Myo1f	7.4107	8.844	8.15533	14.6608	10.21	12.3302	19.4932	42.8192	9.10085
ENSMUSG00000024302	Dtna	3.66042	4.44014	4.70616	5.84484	4.62954	5.16524	3.13582	1.3265	3.73183
ENSMUSG00000024304	Cdh2	1.15719	1.58378	1.02236	1.0584	0.883861	1.07936	0.572482	0.648092	0.643302
ENSMUSG00000024340	Btnl2	0.281024	0.118981	0.451624	0.492097	0.36425	0.150399	0.936077	0.891877	0.568098
ENSMUSG00000024371	C2	48.2081	54.1158	80.4256	81.2808	67.3321	87.2829	166.291	217.723	133.459
ENSMUSG00000024381	Bin1	13.908	20.4635	19.8881	26.242	24.5333	26.6696	16.5325	14.2348	19.4979
ENSMUSG00000024397	Aif1	14.5445	13.0599	10.1249	24.0211	15.5912	20.0361	33.4319	106.707	21.9405
ENSMUSG00000024401	Tnf	1.4279	1.21505	0.491141	3.21707	2.24964	1.33513	6.19274	5.55198	1.26078
ENSMUSG00000024459	H2-M5	0.712381	0.686079	0.737921	0.51277	0.266352	1.26107	0.339886	0.0613808	0.249248
ENSMUSG00000024521	Pmaip1	2.91982	2.04234	1.6147	4.21712	3.61785	2.15369	4.67609	9.65913	3.36412
ENSMUSG00000024526	Cidea	69.9695	63.156	36.6208	55.9314	35.066	67.2843	33.4276	29.1014	40.7429
ENSMUSG00000024556	Me2	4.26905	5.3414	3.94054	6.40157	5.08685	8.45689	6.45498	9.22467	5.72382
ENSMUSG00000024597	Slc12a2	19.2816	16.0052	16.104	16.2546	15.9436	19.5085	11.0851	7.75592	14.6123
ENSMUSG00000024654	Asrgl1	4.67577	5.33984	5.66346	4.54917	4.58248	5.29078	3.11714	2.50113	3.57833
ENSMUSG00000024661	Fth1	169.687	193.891	214.745	221.927	252.039	204.956	279.17	378.842	229.788
ENSMUSG00000024665	Fads2	4.0837	7.2452	3.63341	4.96591	4.91326	6.05742	2.42345	3.03536	2.68807
ENSMUSG00000024672	Ms4a7	19.1449	18.7849	14.5471	53.735	29.0834	21.7769	61.7304	84.8708	40.6432
ENSMUSG00000024677	Ms4a6b	8.28659	6.97704	5.87736	13.4861	10.3432	15.7104	24.6005	55.2382	19.6997
ENSMUSG00000024679	Ms4a6d	22.0434	19.8729	18.2346	39.771	31.5203	53.6731	65.8511	204.943	59.1542
ENSMUSG00000024696	Lpxn	3.50445	3.4511	3.17786	6.96642	5.21847	4.97865	11.922	26.5856	5.58696
ENSMUSG00000024697	Gna14	4.08231	2.7697	3.0806	3.28675	3.00223	2.7484	1.73695	1.69653	2.49967
ENSMUSG00000024725	Ostf1	36.3771	34.4179	32.2039	45.5198	38.8513	43.3722	49.6413	69.8969	44.6887
ENSMUSG00000024727	Trpm6	0.338302	0.421881	0.478568	0.363515	0.4066	0.309437	0.146245	0.117126	0.279772
ENSMUSG00000024730	Ms4a8a	1.48123	2.01577	2.65952	1.78727	1.9799	9.15604	3.78976	12.4851	5.83899
ENSMUSG00000024737	Slc15a3	3.77258	2.43459	1.75384	5.71683	5.16088	3.01483	10.182	21.7597	4.14102
ENSMUSG00000024781	Lipa	13.8875	17.7276	19.9977	32.6611	21.562	24.319	35.1351	46.1657	22.1665
ENSMUSG00000024784	Gpha2	3.1551	6.94147	5.50755	6.73341	3.83389	1.82927	1.22309	1.25165	1.52809
ENSMUSG00000024818	Slc25a45	4.4797	6.14403	4.64336	7.31743	5.82703	8.68546	7.74556	11.3213	6.02648
ENSMUSG00000024900	Cpt1a	31.3912	24.4357	26.9015	22.979	18.9502	25.6784	32.4793	39.6875	27.6265
ENSMUSG00000024909	Efemp2	12.5882	17.0167	12.9332	21.1612	17.907	20.6151	28.3682	29.7045	22.1603
ENSMUSG00000024922	Ovol1	12.3234	8.37901	6.74283	8.21101	10.8981	8.71433	14.0333	14.5412	15.0429
ENSMUSG00000024952	Rps6ka4	20.0216	19.0605	13.4128	15.467	16.5682	15.4829	23.8691	38.8313	19.8853
ENSMUSG00000024965	Fermt3	9.29796	9.62155	8.98381	13.8282	11.2163	18.3279	19.9689	47.3822	13.7559
ENSMUSG00000025017	Pik3ap1	3.21536	3.94852	3.22487	6.55418	5.4171	5.11523	11.1261	26.2975	4.01047
ENSMUSG00000025044	Msr1	4.80127	4.31651	3.88261	6.66237	6.14634	9.92575	10.6891	29.4203	8.7606
ENSMUSG00000025064	Col17a1	153.33	120.277	88.0055	85.703	78.8238	83.5549	101.542	112.137	83.1235
ENSMUSG00000025068	Gsto1	55.3038	34.0061	29.0966	51.0516	46.0335	32.931	84.2828	67.4508	58.6197
ENSMUSG00000025150	Cbr2	65.2747	78.1709	71.5138	88.9468	79.1602	170.115	126.194	148.776	137.604
ENSMUSG00000025154	Arhgap19	5.21657	6.37958	4.7731	9.5811	7.39694	5.94469	8.35244	11.2382	7.56417
ENSMUSG00000025161	Slc16a3	5.02005	5.18219	4.29407	6.23459	6.64066	5.62182	9.68278	10.7363	6.16775
ENSMUSG00000025172	Ankrd2	40.1412	17.6255	10.5631	14.1989	11.9922	12.4921	54.1335	37.852	20.735
ENSMUSG00000025185	Loxl4	7.94903	9.49801	7.45492	7.84408	7.58517	4.43813	5.55628	4.91473	5.90582
ENSMUSG00000025202	Scd3	80.3103	96.4008	56.6031	66.6386	78.2633	76.9095	34.7334	30.9587	42.7243
ENSMUSG00000025213	Kazald1	21.5278	36.1116	39.3101	19.3156	23.6057	3.4694	14.6034	5.02242	14.5518
ENSMUSG00000025283	Sat1	127.998	80.1991	81.5414	126.592	111.599	82.8626	180.52	215.662	149.856
ENSMUSG00000025329	Padi1	0.650466	0.394713	0.0638195	0.483151	0.642693	0.0913098	1.08027	0.537491	1.09937
ENSMUSG00000025351	Cd63	148.027	175.636	177.97	196.092	172.792	106.234	257.236	238.29	193.375
ENSMUSG00000025355	Mmp19	6.45852	7.17857	5.49825	9.36305	8.79584	11.3213	11.4822	24.2891	11.679
ENSMUSG00000025359	Pmel	2.70628	5.99494	3.13064	11.0328	3.30678	6.09515	2.25362	1.0736	1.53866
ENSMUSG00000025407	Gli1	1.88956	8.0384	1.65602	5.78799	3.27026	3.65925	0.666162	0.709589	1.13711
ENSMUSG00000025453	Nnt	5.6856	7.30962	7.60786	16.5503	13.3009	19.0734	17.9429	12.1934	13.2573
ENSMUSG00000025473	Adam8	10.7492	6.12398	5.14975	14.8382	10.1249	9.23749	25.0517	57.21	12.5784
ENSMUSG00000025481	Urah	59.2606	34.6084	26.7422	48.6826	43.5398	31.6365	125.791	205.593	111.293
ENSMUSG00000025492	Ifitm3	94.6808	90.9307	86.7655	106.753	103.389	177.695	191.944	383.294	155.182
ENSMUSG00000025498	Irf7	6.06078	7.26614	4.85101	15.2913	9.86692	17.8204	41.4716	131.686	17.4923
ENSMUSG00000025534	Gusb	20.5386	24.7521	22.2959	26.9688	24.2514	26.1502	40.4818	52.9972	29.9249
ENSMUSG00000025537	Phkg1	6.10477	12.7688	18.9424	11.8457	15.4765	15.5819	5.15043	1.02635	12.4914
ENSMUSG00000025551	Fgf14	1.87195	2.07264	2.17845	1.32957	1.9064	0.640628	1.11236	0.54203	1.15842
ENSMUSG00000025586	Cpeb1	4.65783	5.54342	7.07981	5.43328	4.32169	5.16106	4.26671	2.56005	4.0354
ENSMUSG00000025630	Hprt	55.7537	44.2797	44.4909	62.5548	52.6392	59.7055	69.0237	81.3207	65.246
ENSMUSG00000025648	Pfkfb4	7.43438	7.87151	7.10421	9.77156	8.53469	10.49	11.8941	19.453	9.97873
ENSMUSG00000025656	Arhgef9	0.958698	1.14606	1.51881	0.842467	1.07815	1.20724	0.835589	0.305312	0.769513
ENSMUSG00000025658	Cnksr2	0.23022	0.417733	0.257477	0.322966	0.291618	0.328559	0.223564	0.023443	0.126926
ENSMUSG00000025666	Tmem47	11.311	11.8477	12.9834	10.5608	10.7092	8.38978	9.0994	6.10982	7.18267
ENSMUSG00000025776	Crispld1	0.937071	1.851	0.985091	1.74652	0.943667	2.15016	0.469844	0.339401	0.930142
ENSMUSG00000025804	Ccr1	4.06802	2.0234	2.21688	9.99815	7.90914	6.53836	28.5637	78.657	8.61771
ENSMUSG00000025823	Pdia4	42.3178	42.0892	34.6095	44.404	40.224	57.8769	51.5185	94.0154	57.4583
ENSMUSG00000025877	Hk3	2.25085	2.91081	2.34443	5.24254	3.49368	5.59049	7.81599	21.1587	3.98453
ENSMUSG00000025892	Gria4	1.48615	1.34564	1.59249	0.543503	0.901151	0.488241	1.32334	0.453249	0.79569
ENSMUSG00000025927	Tfap2b	2.00049	2.08873	1.32804	1.31812	1.12169	1.53469	1.22809	0.848899	0.959254
ENSMUSG00000025938	Slco5a1	1.34473	1.76707	1.59079	1.95195	2.11449	1.78782	1.26816	0.486228	1.32581
ENSMUSG00000025978	Rftn2	5.42157	6.22247	7.99247	4.85762	5.51379	3.58904	4.67042	2.51204	5.03977
ENSMUSG00000025997	Ikzf2	5.94896	4.82941	5.79815	4.4455	5.03513	6.13903	2.85032	2.28441	3.44184
ENSMUSG00000026029	Casp8	11.0852	9.47364	10.9966	11.1885	11.0817	12.6034	15.3174	24.4471	12.6704
ENSMUSG00000026062	Slc9a2	0.7896	1.56298	1.22518	1.61834	1.46538	1.7074	0.956406	0.366285	0.975454
ENSMUSG00000026094	Stk17b	21.2086	15.4131	16.6511	22.3625	17.4828	19.4341	21.4065	33.6794	24.6406
ENSMUSG00000026104	Stat1	19.5574	20.0076	17.0885	27.4638	25.7286	36.9065	31.6822	64.5567	27.6674
ENSMUSG00000026126	Ptpn18	9.60317	8.88951	12.9087	17.7799	15.0764	15.5558	23.1989	30.832	17.7521
ENSMUSG00000026167	Wnt10a	8.96459	7.15714	4.4825	5.07158	5.73152	4.67468	6.71269	8.99863	7.98072
ENSMUSG00000026173	Plcd4	1.25095	3.04426	5.1527	1.8265	3.60527	2.993	0.410768	0.0824241	2.18669
ENSMUSG00000026177	Slc11a1	5.17785	5.12198	6.5673	10.0138	8.08244	11.287	16.8962	30.6042	8.48578
ENSMUSG00000026180	Cxcr2	1.95815	0.929994	0.471921	3.17143	2.8106	1.08313	8.69464	37.7728	5.5126
ENSMUSG00000026185	Igfbp5	44.3026	72.8091	65.7584	57.1482	80.5039	47.6911	50.0486	12.4975	32.2153
ENSMUSG00000026208	Des	253.693	257.139	325.741	312.856	326.939	266.691	219.287	87.3821	210.216
ENSMUSG00000026222	Sp100	4.7302	6.26178	6.31938	8.93507	9.01925	9.59244	13.6889	23.4	7.21468
ENSMUSG00000026249	Serpine2	27.4054	22.5793	33.064	16.6638	20.6367	11.846	22.4881	8.23733	17.6125
ENSMUSG00000026288	Inpp5d	7.80823	7.5033	9.38191	11.1332	12.4143	15.1705	16.6128	36.1198	12.4244
ENSMUSG00000026327	Serpinb11	3.44903	1.65506	1.0429	2.47987	1.87502	1.57573	4.50955	5.68728	3.06708
ENSMUSG00000026358	Rgs1	0.427296	0.36308	0.322266	1.23185	0.780104	0.602381	1.31437	1.24909	0.474031
ENSMUSG00000026395	Ptprc	20.7133	22.6432	22.521	34.9011	29.1814	40.5234	41.4955	95.0653	26.0735
ENSMUSG00000026407	Cacna1s	19.602	29.4086	37.1627	27.6147	38.5761	31.293	13.3282	3.54067	22.2987
ENSMUSG00000026433	Rab29	11.9846	10.9453	10.7621	14.0991	12.574	14.5667	19.8667	22.6253	15.8003
ENSMUSG00000026463	Atp2b4	11.5192	11.634	13.1692	8.67949	10.3085	10.4989	7.04096	4.81084	8.89283
ENSMUSG00000026480	Ncf2	6.55279	5.59694	6.40621	9.44731	7.90662	11.0136	13.7064	22.4494	8.70959
ENSMUSG00000026489	Adck3	18.853	21.478	21.8154	31.2442	26.2897	19.8799	15.5378	4.37565	11.8666
ENSMUSG00000026494	Kif26b	0.899656	1.17915	0.502425	1.68053	0.843434	0.76663	0.475541	0.544626	0.411998
ENSMUSG00000026536	Mnda	26.5467	32.2022	35.2461	47.1952	40.1161	73.6067	64.8522	86.6117	48.773
ENSMUSG00000026547	Tagln2	41.7832	43.6625	33.5936	42.0264	39.8898	48.5879	64.8902	86.9253	59.8135
ENSMUSG00000026579	F5	0.565705	0.633478	1.23605	1.70878	2.01117	2.40474	1.2587	1.46646	1.57379
ENSMUSG00000026581	Sell	0.529626	0.445225	0.29424	1.12259	1.14702	0.739114	2.77214	20.2078	1.12486
ENSMUSG00000026582	Sele	0.584909	0.949598	1.19759	1.64752	1.58609	1.63656	1.28354	1.64366	1.0372
ENSMUSG00000026589	Sec16b	3.73594	4.21691	5.2086	3.17228	3.37294	3.30017	3.44472	1.72197	2.81258
ENSMUSG00000026604	Ptpn14	7.70731	9.94016	8.89186	7.39345	7.40909	9.09096	4.49392	2.77895	4.92116
ENSMUSG00000026610	Esrrg	0.350938	0.806583	0.645659	0.875695	0.659559	0.250421	0.153174	0.139766	0.315302
ENSMUSG00000026628	Atf3	5.37565	5.47366	3.47064	9.51033	6.98456	13.3141	16.7251	25.469	4.7829
ENSMUSG00000026645	Olah	1.86978	0.254454	0.0423883	0.711569	1.0534	0.250169	2.83342	1.47558	3.22143
ENSMUSG00000026656	Fcgr2b	22.1238	22.028	19.7763	24.8283	21.9875	30.6021	37.6328	52.4403	32.5042
ENSMUSG00000026676	Ccdc3	13.4027	14.2596	13.6352	11.1118	12.7079	13.6251	8.99588	5.19394	9.60488
ENSMUSG00000026697	Myoc	15.7108	40.6651	43.2334	40.1713	64.7288	21.7435	6.26649	1.43302	27.4213
ENSMUSG00000026726	Cubn	0.29502	0.383104	0.620468	0.430634	0.276427	0.273929	0.213115	0.139349	0.132931
ENSMUSG00000026768	Itga8	6.33895	5.28318	4.33781	4.02885	3.3292	4.40575	3.55363	1.3752	3.21991
ENSMUSG00000026778	Prkcq	6.03304	6.64114	6.93171	9.62898	9.00355	6.74456	4.41182	3.6792	6.31253
ENSMUSG00000026784	Pdss1	8.02388	5.13794	2.32907	5.06753	4.11646	3.42057	5.032	8.52223	6.53019
ENSMUSG00000026817	Ak1	50.1689	91.0252	103.288	90.6425	101.055	103.274	46.4118	14.839	75.6448
ENSMUSG00000026822	Lcn2	5.86237	3.52458	2.48743	7.19639	6.50693	2.95013	41.6976	93.1567	9.24195
ENSMUSG00000026828	Galnt5	0.869469	1.8326	1.4501	1.73338	1.60254	0.96043	0.992283	0.467475	0.885857
ENSMUSG00000026840	Lamc3	9.19311	6.37636	7.02804	3.53125	4.73042	3.02352	4.07285	2.02334	3.90779
ENSMUSG00000026864	Hspa5	154.976	151.37	130.772	182.511	150.622	241.493	214.163	372.239	211.407
ENSMUSG00000026875	Traf1	1.85947	1.61203	1.09914	2.47599	1.42266	2.28518	2.86553	3.9728	2.10572
ENSMUSG00000026880	Stom	32.061	28.5207	26.8078	38.469	31.9499	37.6746	59.5957	91.9248	38.4474
ENSMUSG00000026950	Neb	48.7953	72.5499	65.5407	64.1314	77.5818	75.4267	37.934	8.12316	43.0039
ENSMUSG00000026971	Itgb6	3.72412	5.34371	4.29762	5.7402	4.63514	4.02786	2.97995	2.95841	2.95308
ENSMUSG00000026981	Il1rn	16.9157	9.97653	10.2033	16.4974	16.0073	11.0174	24.3722	25.8336	18.7971
ENSMUSG00000026983	Il1f5	40.6008	19.8858	17.4982	33.6948	39.8973	21.3763	55.3146	36.8946	60.6115
ENSMUSG00000026984	Il1f6	14.141	4.59982	2.7738	17.1773	20.9134	6.0452	32.6012	33.9248	37.7812
ENSMUSG00000026985	Il1f8	13.0813	5.47973	4.55867	10.2081	14.0162	5.56517	18.8342	16.5221	24.4481
ENSMUSG00000026989	Dapl1	66.9031	51.5931	81.4167	52.7738	56.5825	70.8947	27.3761	13.9262	54.2676
ENSMUSG00000027004	Frzb	0.648316	1.24557	1.16657	1.02674	0.852673	1.46951	0.144551	0.170868	0.82233
ENSMUSG00000027009	Itga4	2.07386	2.56569	3.30738	3.66559	3.29098	4.83878	4.22835	5.83495	3.02827
ENSMUSG00000027010	Slc25a12	14.4591	16.0366	16.5855	16.8867	18.7125	18.9645	12.3081	8.98045	14.2197
ENSMUSG00000027015	Cybrd1	0.989699	2.4978	1.54813	2.10477	1.15889	0.754379	0.426289	0.361128	0.341029
ENSMUSG00000027068	Dhrs9	1.84383	1.37664	1.06533	2.15854	2.28704	2.00054	4.36933	7.20037	4.28748
ENSMUSG00000027077	Smtnl1	19.9129	22.669	23.0146	22.032	20.3078	17.3968	14.5926	2.2152	16.2672
ENSMUSG00000027078	Ube2l6	6.3575	5.96673	7.71917	8.89643	9.29162	10.6296	12.8494	20.8723	10.4144
ENSMUSG00000027111	Itga6	56.136	41.5292	37.2567	39.3503	35.5423	38.4623	58.9628	87.6263	49.7355
ENSMUSG00000027165	B230118H07Rik	6.18154	6.0396	9.94291	10.2173	7.56709	9.33098	5.24318	3.82697	6.40828
ENSMUSG00000027215	Cd82	22.4893	23.3565	26.7292	22.3136	20.0563	27.1512	12.4228	16.1861	14.1074
ENSMUSG00000027217	Tspan18	3.43636	4.07809	3.98127	3.21657	3.46502	3.01563	2.62562	1.36273	2.58883
ENSMUSG00000027246	Ell3	4.44996	3.22977	3.36271	2.6944	2.37829	3.23725	1.79225	1.22994	1.61611
ENSMUSG00000027253	Lrp4	15.8967	16.6946	12.9098	14.9439	13.5211	11.6198	8.92273	7.29816	10.3297
ENSMUSG00000027293	Ehd4	14.5123	17.2962	15.2477	19.9214	21.3015	23.3752	30.6763	44.267	20.7256
ENSMUSG00000027298	Tyro3	12.4938	8.71838	7.07705	9.74613	10.8089	8.21711	11.9921	18.6256	14.4642
ENSMUSG00000027318	Adam33	4.35085	4.14467	4.98333	2.77812	3.5164	2.95124	2.90256	1.27503	3.56672
ENSMUSG00000027322	Siglec1	3.29499	4.80525	4.367	5.86207	6.19267	21.9321	19.9248	36.6732	8.99998
ENSMUSG00000027333	Smox	17.6521	13.2663	9.8681	17.5087	17.9313	11.3064	28.4381	46.6559	25.1501
ENSMUSG00000027360	Hdc	6.17525	3.20663	2.50396	17.1597	13.3889	5.69623	38.319	26.4683	9.69242
ENSMUSG00000027375	Mal	3.53039	4.62793	4.74327	4.48512	5.86932	6.06152	3.06857	1.84003	4.28207
ENSMUSG00000027397	Slc20a1	7.89501	8.52957	6.08098	12.4257	9.43512	10.1174	12.7662	14.171	7.83356
ENSMUSG00000027398	Il1b	13.6333	6.75865	1.24889	64.0255	48.1607	10.051	127.181	79.2566	22.7792
ENSMUSG00000027399	Il1a	11.7211	6.6674	7.44384	11.1856	14.6667	9.20323	15.9319	20.8975	18.7548
ENSMUSG00000027401	Tgm3	7.45426	2.25546	1.24569	5.58781	6.12648	1.68902	8.61647	16.374	7.0061
ENSMUSG00000027408	Cpxm1	41.1428	42.0212	28.5309	65.3779	60.7058	25.7624	190.963	161.098	73.6649
ENSMUSG00000027423	Snx5	52.5646	45.0104	46.7888	68.4012	58.8852	68.8203	89.4116	135.733	84.3689
ENSMUSG00000027456	Sdcbp2	28.87	14.8059	20.0982	17.9703	29.4129	19.6353	29.3087	32.45	44.3283
ENSMUSG00000027460	Angpt4	0.891468	1.84776	2.35987	3.0564	3.53309	3.94524	1.3646	1.82427	2.07938
ENSMUSG00000027489	Necab3	0.74414	0.95311	0.764101	0.711409	0.808492	0.374824	0.248875	0.147092	0.398196
ENSMUSG00000027499	Pkia	31.1814	39.5588	53.4567	50.7602	49.1075	51.1939	23.1318	6.02144	35.0835
ENSMUSG00000027524	Edn3	0.52591	0.90544	0.731984	0.879419	0.653917	0.864011	0.24022	0.438386	0.210156
ENSMUSG00000027533	Fabp5	967.394	524.036	306.176	1101.49	806.277	431.961	1698.31	2093.05	1189.38
ENSMUSG00000027605	Acss2	33.4064	44.146	21.6337	29.2592	54.9257	110.122	15.5161	11.7336	30.0663
ENSMUSG00000027611	Procr	7.41953	8.81443	13.6266	11.53	12.086	6.70744	15.3916	14.4596	19.3565
ENSMUSG00000027613	Eif6	34.5039	25.3414	21.9826	29.3432	27.3038	26.4376	37.6892	49.1209	38.6416
ENSMUSG00000027639	Samhd1	16.8849	16.6176	19.2631	24.1035	24.4625	23.9228	36.5536	60.908	27.0016
ENSMUSG00000027692	Tnik	3.73043	4.30626	3.97476	2.82005	3.52179	3.68228	2.06299	1.72766	2.79497
ENSMUSG00000027709	Mccc1	5.21509	7.84206	5.26904	4.04888	7.33839	5.94185	3.57418	3.22735	4.15484
ENSMUSG00000027737	Slc7a11	1.63817	0.644852	0.111413	4.58736	3.27053	0.47459	9.68835	3.98457	1.90554
ENSMUSG00000027750	Postn	149.707	198.51	81.9046	342.71	145.144	163.212	285.441	240.927	226.239
ENSMUSG00000027777	Schip1	11.6415	16.3732	17.8165	17.7761	16.4428	15.1038	11.017	6.17676	13.4933
ENSMUSG00000027784	Ppm1l	2.53776	3.65604	3.31158	2.65039	3.89677	3.32603	2.14442	1.06181	2.27291
ENSMUSG00000027805	Pfn2	7.47589	9.43242	8.08592	9.70408	8.46947	8.99677	5.57262	2.65248	5.62029
ENSMUSG00000027808	Serp1	123.192	105.952	100.086	138.471	118.863	135.723	168.221	232.206	146.224
ENSMUSG00000027907	S100a11	24.027	19.0935	26.6781	22.0251	25.6159	20.133	40.3839	31.2839	28.6729
ENSMUSG00000027932	Slc27a3	27.6792	23.9416	17.6051	15.674	17.9497	15.1928	15.3874	20.226	20.6157
ENSMUSG00000027962	Vcam1	3.06295	3.77069	3.21976	9.20172	5.97796	5.80037	7.34337	10.8468	8.94242
ENSMUSG00000027966	Col11a1	1.08599	2.61474	0.822864	2.69993	1.06586	0.950047	0.420989	0.198841	0.49079
ENSMUSG00000027978	Prss12	5.43565	3.67772	4.82465	4.68856	4.20934	4.02668	6.47621	9.49404	5.05959
ENSMUSG00000027993	Trim2	16.9434	17.4723	21.9108	14.9691	16.4394	21.0198	7.76591	6.12095	10.1153
ENSMUSG00000028023	Pitx2	1.35726	2.64825	2.42638	3.1599	2.09049	1.62257	1.33017	0.572577	0.890823
ENSMUSG00000028031	Dkk2	8.4175	6.90284	5.05565	4.72799	3.92231	5.55268	3.41075	3.21708	4.67092
ENSMUSG00000028033	Kcnq5	1.39461	1.5308	1.73458	1.76937	2.46595	2.5739	1.18655	0.572135	1.65905
ENSMUSG00000028037	Ifi44	0.545868	0.868572	0.851649	1.70952	1.25178	2.63675	2.53206	4.54658	1.03275
ENSMUSG00000028048	Gba	34.7414	25.4842	25.7985	26.6488	29.5775	29.332	37.7011	47.5404	37.4064
ENSMUSG00000028082	Sh3d19	20.4494	20.5892	24.4847	15.5232	19.894	17.3608	16.4817	9.9508	17.7418
ENSMUSG00000028088	Fmo5	5.11452	4.03357	5.71632	4.15764	3.99847	4.22123	3.01778	1.83772	3.47233
ENSMUSG00000028134	Ptbp2	4.98282	5.28086	5.52819	5.03321	5.51113	6.16067	3.73707	3.3545	3.27883
ENSMUSG00000028167	Bdh2	11.8861	14.056	17.7503	15.6775	11.9199	3.18063	10.0981	5.62396	11.0474
ENSMUSG00000028194	Ddah1	6.05135	6.26389	4.3282	3.97017	6.28579	2.98245	6.69529	11.8291	7.64291
ENSMUSG00000028262	Clca2	57.8018	35.5214	33.0236	60.7281	45.2109	49.148	38.1713	26.9182	34.8267
ENSMUSG00000028268	Gbp3	7.34592	6.83533	6.40277	9.97492	8.36992	12.5685	11.2673	19.7448	10.7471
ENSMUSG00000028364	Tnc	9.371	10.8997	2.33957	38.4453	18.5202	3.0219	40.6009	133.075	30.7698
ENSMUSG00000028367	Txn1	115.063	101.924	96.994	144.024	113.188	124.301	167.178	199.022	139.208
ENSMUSG00000028381	Ugcg	32.3814	22.38	22.8017	30.3672	29.3254	24.4468	36.8224	50.6853	29.7517
ENSMUSG00000028402	Mpdz	10.5174	13.2528	13.9356	11.8712	12.5694	15.1563	9.36181	6.22302	10.5669
ENSMUSG00000028434	Epb4.1l4b	13.9681	10.9925	9.11239	8.37888	7.88587	8.52456	8.09269	6.02084	7.78819
ENSMUSG00000028435	Aqp3	152.841	55.9762	24.5913	72.6035	89.2266	37.4578	345.585	463.35	169.478
ENSMUSG00000028459	Cd72	6.33307	6.63645	5.13361	6.83695	6.19971	6.6517	9.36785	13.6892	6.82098
ENSMUSG00000028464	Tpm2	410.378	503.404	624.469	533.085	605.949	540.858	359.234	126.822	439.152
ENSMUSG00000028467	Gba2	7.74306	5.59654	5.51293	5.11775	8.56412	5.78776	8.8599	8.84825	11.6466
ENSMUSG00000028476	Reck	14.2675	11.8759	20.2036	9.18802	12.9391	14.1406	9.26943	4.63256	10.8067
ENSMUSG00000028478	Clta	28.4575	25.7895	25.9006	32.0666	26.373	34.2807	37.2703	48.4853	35.3738
ENSMUSG00000028480	Glipr2	5.66069	8.03921	6.65777	14.2471	10.5457	17.7248	10.6903	25.3058	12.246
ENSMUSG00000028487	Bnc2	1.7342	2.91256	1.9266	3.30298	2.32501	3.73004	1.57181	1.10474	1.69886
ENSMUSG00000028497	Ptplad2	7.60405	7.86878	8.2931	13.7413	10.3521	12.3872	14.1385	13.854	11.2479
ENSMUSG00000028517	Ppap2b	42.0869	32.6643	43.2747	25.5013	34.5591	33.8599	32.4508	19.1107	28.7902
ENSMUSG00000028518	Prkaa2	5.37693	6.99309	8.38762	6.56158	7.87453	8.0454	3.95508	1.03083	5.34981
ENSMUSG00000028519	Dab1	2.31342	1.68176	1.80628	1.01922	1.35078	1.81958	1.13844	0.554688	1.41943
ENSMUSG00000028528	Dnajc6	2.02295	1.94039	1.6578	1.28888	0.906507	1.63403	0.847367	0.716004	0.836132
ENSMUSG00000028532	Cachd1	5.6591	6.27445	5.34705	4.47299	4.58328	4.84585	4.2709	2.25555	4.27422
ENSMUSG00000028551	Cdkn2c	12.1785	12.7944	12.7269	15.3446	17.0789	24.1562	13.214	10.4035	16.6443
ENSMUSG00000028555	Ttc39a	2.11957	1.28297	0.877532	1.05193	1.27287	0.928507	2.12764	2.79125	2.11343
ENSMUSG00000028581	Laptm5	18.6603	23.6846	21.7464	30.3302	26.5663	35.7444	41.7312	85.2452	28.8675
ENSMUSG00000028645	Slc2a1	19.6933	15.0632	8.34809	18.7947	15.9842	12.1097	35.7843	38.928	19.7346
ENSMUSG00000028655	Mfsd2a	7.85591	4.9841	1.88141	4.07641	4.30795	2.9009	6.75802	8.47135	5.51575
ENSMUSG00000028680	Plk3	17.6893	12.3716	12.1379	13.0797	19.2145	15.8674	21.2646	20.4271	22.9719
ENSMUSG00000028681	Ptch2	1.47076	4.97272	1.02057	3.95013	2.61084	3.17784	2.01145	1.25859	1.12649
ENSMUSG00000028737	Aldh4a1	13.5526	18.4787	14.9117	16.4269	21.1139	20.2453	8.5405	7.6764	16.3663
ENSMUSG00000028751	Pla2g2e	3.94705	2.7477	2.89607	1.26166	2.7855	0.81246	1.53009	1.02027	2.88666
ENSMUSG00000028776	Tinagl1	9.51541	9.86823	10.0643	9.63513	11.4828	12.5117	20.9873	22.7639	16.6861
ENSMUSG00000028780	Sema3c	25.3334	31.5964	34.2722	35.286	29.1696	35.4731	21.1013	13.3593	26.7997
ENSMUSG00000028843	Sh3bgrl3	32.6339	24.6943	28.4159	35.9853	28.7824	35.602	39.736	49.6841	40.2573
ENSMUSG00000028859	Csf3r	1.30397	1.1067	0.61538	3.2524	2.52157	1.14059	7.84863	28.246	1.94866
ENSMUSG00000028862	Map3k6	7.60152	6.48586	6.38471	6.90513	8.17068	13.2575	10.5983	12.146	13.1074
ENSMUSG00000028871	Rspo1	6.63535	6.05951	7.62018	4.42881	5.96229	5.70049	2.61734	2.12703	4.39028
ENSMUSG00000028874	Fgr	1.66644	1.43844	1.27044	3.36492	1.95554	2.99407	4.97114	14.7862	1.67235
ENSMUSG00000028919	Arhgef19	2.87517	4.79801	4.47355	3.43339	2.94607	1.4021	2.42135	0.882847	1.38012
ENSMUSG00000028927	Padi2	4.01645	2.95774	3.16996	4.26174	2.53503	2.40533	2.39237	0.939227	1.72897
ENSMUSG00000028931	Kcnab2	4.52497	6.87735	5.34035	9.12368	6.79416	11.1254	8.44063	14.1642	6.18126
ENSMUSG00000028943	Espn	0.44661	0.729335	0.433764	0.243105	0.434155	0.239018	0.194391	0.144811	0.237588
ENSMUSG00000028965	Tnfrsf9	0.991406	0.916422	0.709033	0.736996	0.836469	0.640704	1.06353	2.17908	1.81508
ENSMUSG00000028996	Rbp7	3.55682	4.50595	12.9659	4.1404	4.46348	7.96029	28.8798	11.7348	10.6546
ENSMUSG00000029090	Gpr125	16.7546	18.6789	19.5143	14.688	12.2003	20.1166	7.68439	6.45276	10.8771
ENSMUSG00000029093	Sorcs2	1.39584	2.74147	1.60223	3.34393	2.37289	1.78686	1.78373	1.38279	1.09891
ENSMUSG00000029095	Ablim2	1.71655	1.70082	2.62607	2.01373	2.03429	2.28119	1.35578	0.648114	1.49134
ENSMUSG00000029098	Acox3	28.2961	25.1523	20.4334	26.1234	16.9456	39.486	17.2196	13.095	16.3005
ENSMUSG00000029120	Ppp2r2c	9.8705	11.2897	9.80662	7.36888	8.09122	8.89853	4.63614	4.23379	8.39312
ENSMUSG00000029154	Cwh43	17.1726	10.6034	7.01884	9.78136	7.15446	8.12916	15.5046	16.5697	14.5363
ENSMUSG00000029158	Yipf7	6.00125	7.39512	8.71613	8.47698	9.00728	7.8706	5.04481	0.886432	6.86574
ENSMUSG00000029188	Slc34a2	8.34165	3.38209	2.79269	5.26983	8.2768	4.36168	9.23764	8.26965	10.2437
ENSMUSG00000029211	Gabra4	0.281562	0.591932	0.445493	0.554669	0.33034	0.301374	0.100366	0.0761268	0.0883218
ENSMUSG00000029236	Nmu	1.54707	0.578974	0.0964487	0.666679	1.64492	0.258739	3.69831	1.94951	3.95816
ENSMUSG00000029299	Abcg3	1.83095	1.54222	1.79751	3.23673	2.22018	3.22849	2.27128	2.28835	3.00001
ENSMUSG00000029304	Spp1	14.113	10.7268	4.65293	66.3641	34.5414	9.34892	76.4147	187.086	20.0863
ENSMUSG00000029321	Slc10a6	12.4018	6.18993	6.43342	7.73535	7.77244	8.21569	12.3611	16.2199	13.8822
ENSMUSG00000029322	Plac8	14.9433	10.2282	21.2212	32.5895	28.1597	64.3435	96.0632	250.273	61.0702
ENSMUSG00000029359	Tesc	9.0078	9.17271	14.5234	8.52836	11.7761	13.0079	3.13067	1.8266	8.31986
ENSMUSG00000029361	Nos1	1.88038	1.77565	1.69796	1.0528	2.00496	1.40677	1.48959	0.235013	1.14437
ENSMUSG00000029366	Dck	5.67031	5.83345	3.34694	8.26248	5.84089	7.97641	10.1907	20.5401	6.50692
ENSMUSG00000029373	Pf4	33.1013	32.8643	40.4496	43.6498	38.9515	46.008	80.1085	87.9478	69.2366
ENSMUSG00000029379	Cxcl3	0.793466	0.172769	0	4.65024	2.08261	0.339719	12.6317	7.42127	1.20301
ENSMUSG00000029401	Rilpl2	6.0434	7.48803	8.64044	11.7919	9.79144	8.84049	11.6617	15.4405	9.01723
ENSMUSG00000029432	Gbas	52.7775	55.4357	67.3522	57.938	62.2286	65.2652	41.1656	25.9889	52.819
ENSMUSG00000029438	Bcl7a	2.70485	3.13893	2.04578	2.75207	2.02263	2.66452	1.30588	1.39835	1.82515
ENSMUSG00000029465	Arpc3	56.6931	46.1105	44.7637	56.8227	47.61	56.0636	71.4046	91.5178	73.3065
ENSMUSG00000029470	P2rx4	22.3921	17.404	22.0467	22.7839	21.0913	17.7935	33.1708	41.738	26.603
ENSMUSG00000029499	Pxmp2	6.34487	6.61459	12.888	9.58272	11.5135	13.2945	5.28692	3.3166	10.1056
ENSMUSG00000029503	P2rx2	0.70924	0.590466	1.14442	0.636951	0.527235	1.2057	0.431277	0.186925	0.484944
ENSMUSG00000029553	Tfec	1.50761	1.66583	1.01003	4.14462	2.03429	2.84202	3.60543	9.14921	3.29785
ENSMUSG00000029561	Oasl2	3.35829	3.78176	3.55443	6.95663	5.65705	11.4698	16.139	42.9578	7.52736
ENSMUSG00000029605	Oas1b	0.789108	1.11683	0.899572	1.41017	1.03011	1.822	1.82958	3.63659	1.34453
ENSMUSG00000029616	Erp29	20.764	20.1377	17.2282	22.2494	19.371	22.6842	26.5247	35.8862	24.8547
ENSMUSG00000029622	Arpc1b	77.7143	78.0948	67.9899	85.7794	79.7204	110.864	120.118	202.474	113.343
ENSMUSG00000029661	Col1a2	3415.29	5985.39	6246.15	2869.31	4008.4	730.348	2897.84	1271.16	1622.13
ENSMUSG00000029673-2	#N/A	1.41515	1.79031	1.71221	1.14222	1.34384	1.15007	1.05654	0.87329	0.854254
ENSMUSG00000029683	Lmod2	12.2287	12.7991	7.76695	15.6284	12.2227	11.5725	8.51109	3.54592	8.87669
ENSMUSG00000029727	Cyp3a13	2.46466	1.25317	1.49939	2.94786	2.36959	1.65243	3.61174	3.7315	4.51698
ENSMUSG00000029752	Asns	21.2455	13.8736	12.6514	13.3599	15.8495	19.6142	20.6182	27.8309	24.0422
ENSMUSG00000029762	Akr1b8	14.1492	10.7829	9.82072	18.6694	13.5253	12.5575	23.2807	43.1217	18.2046
ENSMUSG00000029769	Ccdc136	2.05442	2.27405	1.60377	2.74773	1.57633	1.91216	1.05832	0.908164	0.958401
ENSMUSG00000029798	Herc6	1.79829	2.04513	2.30056	3.50307	2.65795	4.45072	4.67161	8.12458	2.72985
ENSMUSG00000029822	Osbpl3	9.54588	8.17306	6.44163	7.25863	5.41508	8.95964	4.14678	6.03804	5.67281
ENSMUSG00000029838	Ptn	16.0679	21.3355	11.6886	15.049	6.22985	14.4481	6.5608	5.89526	5.47618
ENSMUSG00000029862	Clcn1	2.26116	3.5007	3.95353	3.39587	4.30428	3.28531	2.15082	0.192606	2.65918
ENSMUSG00000029915	Clec5a	0.997735	1.17401	1.14602	2.39236	1.44997	2.76155	2.46911	6.08461	2.24105
ENSMUSG00000030029	Lrig1	44.8654	45.6143	34.8649	35.9889	31.2114	37.9834	26.5872	20.8209	29.0363
ENSMUSG00000030064	Frmd4b	11.6506	11.3479	11.9435	12.6686	15.1716	22.6507	18.8961	24.3276	17.105
ENSMUSG00000030091	Nup210	2.685	4.94211	3.16056	3.9166	3.42855	4.67622	2.03465	3.13495	2.34591
ENSMUSG00000030093	Wnt7a	0.492176	0.494614	0.365058	0.410204	0.220823	0.108063	0.0260915	0.141358	0.0382672
ENSMUSG00000030104	Edem1	12.0095	11.191	11.8893	12.1654	12.5213	14.9459	16.9126	23.7619	13.3959
ENSMUSG00000030116	Mfap5	11.7619	16.7986	19.6666	24.7415	18.74	30.0655	17.5375	7.52522	20.0895
ENSMUSG00000030142	Clec4e	0.95386	1.02116	0	8.0174	4.03358	0.986947	11.6846	17.8429	2.69955
ENSMUSG00000030144	Clec4d	2.97152	1.97814	0.113276	13.982	8.77635	1.53966	25.0047	26.9668	5.73917
ENSMUSG00000030148	Clec4a2	8.40621	6.6926	7.11364	14.5734	10.65	11.64	15.4783	36.1637	11.2691
ENSMUSG00000030170	Wnt5b	3.05588	3.62102	2.5935	2.57762	2.26492	4.96961	1.67549	1.77766	1.7577
ENSMUSG00000030187	Klra2	0.478421	0.406918	0.21624	0.905659	1.01009	1.02417	1.44505	3.80145	0.846247
ENSMUSG00000030200	Bcl2l14	2.30366	0.926868	1.43201	1.003	1.10348	1.0006	0.793799	0.373967	0.489314
ENSMUSG00000030214	Plbd1	54.7085	38.2367	38.6545	41.8409	45.8667	44.009	54.8464	94.4733	56.3701
ENSMUSG00000030220	Arhgdib	29.3246	28.581	28.0994	41.0798	31.8009	38.6222	41.2848	67.0495	40.9505
ENSMUSG00000030225	Dera	17.2943	13.5276	10.0868	16.4054	13.7495	15.823	18.1512	26.1086	18.1263
ENSMUSG00000030228-2	#N/A	1.59035	1.07686	1.27682	1.1462	0.980391	1.07948	0.621518	0.282414	0.607702
ENSMUSG00000030228-3	#N/A	0.672168	0.445006	0.607055	0.331038	0.556293	0.777801	0.309865	0.111919	0.376426
ENSMUSG00000030246	Ldhb	44.7933	44.4106	37.5226	51.1893	34.9835	42.6432	27.6384	19.0879	27.9013
ENSMUSG00000030247	Kcnj8	14.5266	11.433	22.2461	7.67682	11.1691	5.914	9.07811	4.22156	14.7754
ENSMUSG00000030255	Sspn	11.9793	14.704	16.6532	13.855	14.4731	14.1663	9.92735	4.73584	11.8982
ENSMUSG00000030256	Bhlhe41	2.07616	2.60278	2.30485	2.5689	2.13502	2.75485	1.50767	0.992998	1.48572
ENSMUSG00000030257	Srgap3	1.35582	1.633	2.00839	1.30884	1.65517	0.819625	1.29912	0.898086	0.71935
ENSMUSG00000030263	Lrmp	5.95682	5.30732	6.83059	6.59454	6.23614	11.7165	8.47358	14.029	7.5519
ENSMUSG00000030268	Bcat1	2.3406	3.42728	3.31856	3.12092	2.79696	1.38393	4.06256	5.71861	2.91849
ENSMUSG00000030303	Far2	213.482	152.356	104.645	146.13	98.4391	160.864	98.956	84.9651	107.462
ENSMUSG00000030307	Slc6a11	0.511947	0.589511	0.785632	0	0.0287118	0	0.0508867	0.0110277	0.0298533
ENSMUSG00000030310	Slc6a1	1.0819	1.23879	1.36758	0.0367468	0.217599	0.139762	0.0674901	0.0626822	0.084844
ENSMUSG00000030319	Cand2	3.0206	3.54644	3.10901	2.53771	3.40416	3.02711	2.54853	1.11952	2.1252
ENSMUSG00000030325	Klrb1c	0.08581	0.264693	0.156923	0.380347	0.486599	0.367392	0.236548	2.0505	0.419212
ENSMUSG00000030365	Clec2i	0.721577	1.21578	1.06251	2.14915	1.83714	1.23208	2.39762	2.88661	1.09401
ENSMUSG00000030399	Ckm	537.924	961.987	1331.14	829.074	1094.98	1127.22	410.943	96.816	832.14
ENSMUSG00000030401	Rtn2	37.5999	51.4878	77.6063	56.5247	63.6244	59.3739	32.6319	6.53364	46.2992
ENSMUSG00000030409	Dmpk	15.1284	23.4346	21.9318	19.5523	23.374	31.0589	12.3939	7.93357	19.5707
ENSMUSG00000030413	Pglyrp1	0.70538	1.21592	1.11405	2.31597	1.37142	1.63587	2.30908	5.53076	1.84185
ENSMUSG00000030427	Lilra6	0.875251	0.809052	0.774215	1.80555	1.65352	2.08579	1.86078	8.49049	1.58573
ENSMUSG00000030428	Ttyh1	1.28744	1.31153	1.24752	0.806159	0.697287	0.679175	0.67495	0.618038	0.836551
ENSMUSG00000030452	Nipa2	12.8421	12.6735	11.2707	13.7171	13.4144	17.0489	17.354	26.505	14.0662
ENSMUSG00000030484	Lypd5	38.8202	23.995	22.5158	20.9622	37.0632	22.5547	40.864	39.0735	50.0831
ENSMUSG00000030510	Cers3	37.5308	16.0329	18.7182	21.5036	30.6668	20.5207	49.5402	52.6175	50.0818
ENSMUSG00000030523	Trpm1	0.450827	0.94778	0.170574	1.3628	0.649826	0.915181	0.192844	0.0696523	0.157131
ENSMUSG00000030554	Synm	21.6742	27.0871	25.9853	19.6495	29.8657	25.1875	14.8458	3.84201	19.2018
ENSMUSG00000030560	Ctsc	37.3026	43.8903	41.687	52.6284	57.4042	50.0005	67.6995	104.032	57.9461
ENSMUSG00000030579	Tyrobp	61.2719	61.2149	69.2423	130.322	93.8435	104.567	173.083	271.728	112.87
ENSMUSG00000030592	Ryr1	19.0328	40.0263	33.338	24.522	44.1449	31.5817	15.5509	4.36945	24.9004
ENSMUSG00000030616	Sytl2	1.72755	2.02327	2.64574	1.97662	2.29854	1.73704	1.12743	0.977304	1.48158
ENSMUSG00000030643	Rab30	4.12153	4.86067	5.47626	4.58627	4.77456	3.58732	3.48932	1.448	3.16172
ENSMUSG00000030672	Mylpf	721.957	1203.88	1705.09	1265.44	1407.25	1606.32	719.145	201.716	1054.37
ENSMUSG00000030713	Klk7	368.319	204.972	182.993	277.705	317.827	197.658	429.311	427.725	439.296
ENSMUSG00000030717	Nupr1	52.6118	44.9931	45.5254	43.5335	34.69	51.5935	27.4198	22.3558	33.9553
ENSMUSG00000030730	Atp2a1	327.979	612.515	661.522	464.193	700.575	692.257	260.878	48.0755	469.557
ENSMUSG00000030739	Myh14	10.4774	9.9873	7.43996	5.31625	7.26783	6.65086	4.948	4.99304	6.14397
ENSMUSG00000030768	Disp1	2.49788	3.50641	3.19662	2.51575	2.76396	2.55329	2.35799	1.60138	1.71294
ENSMUSG00000030785	Cox6a2	32.0622	38.2934	59.8757	46.3061	48.6517	49.1016	35.6544	7.5652	34.6701
ENSMUSG00000030787	Lyve1	8.27284	6.9056	13.192	5.15754	8.26284	77.8721	17.6907	15.7039	24.7127
ENSMUSG00000030793	Pycard	28.8369	18.3284	18.4867	21.0858	20.9451	20.353	27.4298	30.6728	31.788
ENSMUSG00000030844	Rgs10	20.2623	18.5623	24.0181	32.7496	30.0529	23.2162	35.0802	35.7049	29.111
ENSMUSG00000030849	Fgfr2	35.5604	41.4024	31.5221	35.9309	29.2381	29.1798	22.2084	20.794	25.0157
ENSMUSG00000030852	Tacc2	17.1274	18.4769	18.9025	12.9043	18.2617	22.1789	14.192	7.03666	15.3994
ENSMUSG00000030862	Cpxm2	22.6244	20.42	29.5763	16.6374	22.0379	8.56207	16.0532	7.43466	14.3314
ENSMUSG00000030867	Plk1	4.57905	4.92586	2.03002	4.42081	3.10888	2.39228	4.43301	7.85644	4.66507
ENSMUSG00000030921	Trim30a	6.88187	7.57611	7.99747	14.1259	11.0501	17.6478	22.3472	53.1401	10.8668
ENSMUSG00000030935	Acsm3	7.98795	6.4607	4.23246	6.72276	4.28626	4.10531	3.35607	2.30029	4.01407
ENSMUSG00000030946	Lhpp	44.807	36.6027	29.5044	42.385	21.7093	21.1504	25.7023	18.0635	23.0264
ENSMUSG00000030994	D7Ertd443e	2.72173	2.09699	3.60593	2.59837	2.03525	2.47999	1.15428	0.828609	2.13028
ENSMUSG00000030996	Art1	6.53557	8.90928	11.903	11.1417	11.3287	10.0522	4.8794	0.688262	5.81546
ENSMUSG00000031097	Tnni2	782.32	1136.66	1452.12	1054.14	1272.17	1345.73	690.429	154.355	1017.11
ENSMUSG00000031098	Syt8	0.718033	0.586291	0.517276	0.451856	0.523507	0.149442	1.38143	1.36281	1.45152
ENSMUSG00000031119	Gpc4	6.53885	7.27809	6.12845	5.69142	6.19296	8.83873	5.33803	3.33443	4.32483
ENSMUSG00000031147	Magix	1.06611	1.41507	1.98119	1.35219	1.98758	1.42251	0.739756	0.261736	0.929972
ENSMUSG00000031200	Mtcp1	4.18436	4.74531	4.22022	4.8199	4.14676	7.22827	3.20811	3.17672	3.1133
ENSMUSG00000031216	Stard8	7.49795	8.85803	9.03861	10.3562	11.5507	17.097	16.1888	14.1995	15.4668
ENSMUSG00000031220	Awat2	8.28311	10.2058	7.17946	6.61054	5.35892	23.342	3.22632	3.06524	6.49208
ENSMUSG00000031239	Itm2a	22.3334	32.8856	46.6839	43.1823	52.5027	61.347	21.5447	6.5304	38.7212
ENSMUSG00000031250	Tnmd	29.0198	83.3681	58.069	76.0608	45.746	12.0047	16.6796	13.5795	28.4738
ENSMUSG00000031266	Gla	4.13933	3.61343	3.18481	7.12263	4.87038	4.34955	10.5931	18.2917	5.47221
ENSMUSG00000031273	Col4a6	3.70317	3.71697	3.21937	2.39613	1.79702	2.78429	1.38808	0.816107	1.30854
ENSMUSG00000031274	Col4a5	6.41857	6.44113	6.75067	4.51241	4.33436	4.66756	3.43154	1.79053	3.57193
ENSMUSG00000031284	Pak3	9.30073	7.74109	7.65846	7.38841	7.79365	8.68092	4.11503	2.71907	5.43368
ENSMUSG00000031299	Pdha1	112.037	118.532	119.467	122.344	124.831	168.635	88.1963	73.0203	108.356
ENSMUSG00000031312	Itgb1bp2	10.6048	14.5598	17.4918	21.3367	17.2756	17.3752	10.9813	2.12842	13.7736
ENSMUSG00000031372	Trex2	19.3263	9.94097	8.32146	11.1933	18.0115	9.23455	24.2511	31.0454	35.5536
ENSMUSG00000031380	Figf	2.48114	2.06313	2.37747	2.46313	3.01968	5.5833	4.2411	5.49268	3.7124
ENSMUSG00000031402	Mpp1	20.6364	19.9636	23.9749	29.5122	25.3364	32.8805	33.1285	48.4379	27.6141
ENSMUSG00000031425	Plp1	3.98685	3.84892	2.79568	4.48918	3.56097	4.10326	2.65071	1.81301	2.74678
ENSMUSG00000031450	Grk1	1.51495	2.35953	1.6187	0.860276	1.77668	1.58693	3.21574	3.29119	2.61022
ENSMUSG00000031451	Gas6	56.0559	85.7009	94.456	102.547	91.7759	197.124	68.6062	48.4964	73.9028
ENSMUSG00000031461	Myom2	62.3921	51.9794	55.7915	62.8383	52.1639	56.1867	42.5226	10.6288	38.3405
ENSMUSG00000031517	Gpm6a	6.95971	5.9963	7.19358	4.44407	4.29267	7.5265	3.42361	1.45161	2.86236
ENSMUSG00000031548	Sfrp1	10.9324	19.9754	13.9364	17.8843	16.3675	15.596	10.6998	9.45406	12.4631
ENSMUSG00000031555	Adam9	24.1641	26.2644	22.678	29.373	23.9404	32.7208	32.2532	45.2913	30.4804
ENSMUSG00000031558	Slit2	9.1846	6.88299	6.71923	6.71579	8.32109	4.63122	5.45773	4.7415	5.50613
ENSMUSG00000031561	Tenm3	1.64053	2.42718	1.27784	2.19219	1.77321	1.53493	0.818292	0.81813	0.974037
ENSMUSG00000031595	Pdgfrl	22.382	39.7752	40.2445	19.1288	24.5189	3.19599	19.9251	6.52595	12.2929
ENSMUSG00000031596	Slc7a2	8.79631	11.1864	7.59799	10.0318	7.48791	9.74608	5.38706	3.13162	5.96897
ENSMUSG00000031618	Nr3c2	2.69305	2.96138	3.28698	2.73926	2.99946	2.78115	2.01449	0.924665	2.01759
ENSMUSG00000031661	Nkd1	2.12493	3.47516	2.84155	2.157	2.48061	1.66859	1.21822	0.873076	1.54754
ENSMUSG00000031673	Cdh11	6.97985	12.2555	4.9541	17.8937	10.2882	14.7491	6.79427	6.28268	6.42153
ENSMUSG00000031712	Il15	3.44677	2.89797	2.63815	4.47067	4.26296	5.7166	4.92128	5.48538	3.41488
ENSMUSG00000031722	Hp	221.165	191.587	725.782	320.103	288.972	449.815	1044.26	1025.78	801.601
ENSMUSG00000031740	Mmp2	272.236	256.016	344.482	199.7	244.602	86.5174	263.533	135.586	230.291
ENSMUSG00000031748	Gnao1	0.583889	0.606112	1.04294	0.427998	0.712807	0.377892	0.505332	0.136889	0.301949
ENSMUSG00000031750	Il34	9.31492	9.03079	9.52888	8.50535	8.31157	10.498	5.86891	4.66475	6.33978
ENSMUSG00000031760	Mt3	3.19945	3.48324	3.85938	1.02604	0.940301	0.955698	0.846081	0.916776	0.526447
ENSMUSG00000031765	Mt1	36.1225	36.8597	34.3284	37.2945	32.6571	53.2865	62.9712	124.327	60.4428
ENSMUSG00000031791	Tmem38a	27.0085	36.1954	45.8312	43.8263	44.1632	40.4163	23.1238	5.63349	34.757
ENSMUSG00000031803	B3gnt3	2.12145	2.04716	2.23635	2.92069	2.48412	2.87712	4.17424	3.84795	3.13114
ENSMUSG00000031824	6430548M08Rik	14.7292	11.0208	10.9624	10.3283	13.0271	12.8759	16.7203	19.5777	16.7588
ENSMUSG00000031825	Crispld2	29.4814	30.3314	31.6712	18.8649	28.8956	14.0551	25.9155	38.4962	26.229
ENSMUSG00000031834	Pik3r2	31.9497	30.4046	26.0964	28.5479	28.6614	27.5258	40.6097	58.0589	32.689
ENSMUSG00000031841	Cdh13	21.205	24.0645	21.8374	23.2409	20.4286	18.5199	18.2252	9.2639	17.7131
ENSMUSG00000031906	Smpd3	13.9427	8.10716	8.57678	7.35285	15.4673	11.7407	14.5769	13.9724	21.4471
ENSMUSG00000031939	Taf1d	28.5901	29.3455	21.1209	34.653	27.8964	29.4755	35.5745	53.1215	43.0053
ENSMUSG00000031990	Jam3	5.71281	8.72062	7.94945	9.29162	8.0832	9.44421	5.52728	5.00991	5.97979
ENSMUSG00000032009	Sesn3	4.28806	5.76414	5.14202	5.30667	5.40586	4.90664	3.7027	2.01315	4.15041
ENSMUSG00000032011	Thy1	25.803	43.3022	25.118	43.374	32.8165	57.6058	27.5055	31.5448	24.2139
ENSMUSG00000032012	Pvrl1	9.90858	9.21805	6.41531	5.3363	7.78434	6.05319	9.3177	10.2205	8.30199
ENSMUSG00000032062	2310030G06Rik	2.9538	3.24628	2.88354	2.8543	2.17058	3.38641	1.54844	1.45046	1.97389
ENSMUSG00000032091	Tmprss4	68.5221	34.0717	29.8348	42.0643	47.4676	30.7899	53.4256	51.0663	67.7611
ENSMUSG00000032093	Cd3e	0.696907	0.576628	0.722962	1.12577	1.40914	1.01449	0.201718	0.249798	0.309939
ENSMUSG00000032115	Hyou1	23.2859	25.7624	18.2	21.7428	22.3975	34.4544	28.7099	48.7728	30.0153
ENSMUSG00000032122	Slc37a2	6.81138	4.26463	3.0869	11.089	7.29106	3.64808	11.7655	21.0978	8.6825
ENSMUSG00000032179	Bmp5	0.450368	1.25429	1.31637	1.41335	1.10979	1.02017	0.36812	0.187708	0.772806
ENSMUSG00000032204	Aqp9	10.7716	5.87997	7.19822	8.1213	8.01517	6.93067	11.7762	15.1157	9.72536
ENSMUSG00000032224	Fam81a	8.53213	5.58518	4.64022	3.7149	4.50105	4.03691	4.60663	5.77071	6.47071
ENSMUSG00000032232	Cgnl1	8.95092	10.0943	11.949	7.65188	8.42564	10.5199	6.16125	4.51263	8.60381
ENSMUSG00000032278	Paqr5	6.34194	4.52933	5.13166	4.98738	5.00111	4.06206	2.1923	1.70489	4.74868
ENSMUSG00000032281	Acsbg1	97.6473	67.1451	71.2296	61.0277	59.4334	101.117	54.1008	38.2874	60.6713
ENSMUSG00000032289	Thsd4	0.918565	0.78221	0.798323	0.87342	0.645399	1.45533	0.549993	0.295427	0.473418
ENSMUSG00000032291	Crabp1	24.9187	28.5848	10.8495	56.1582	37.484	18.6084	47.556	40.2949	29.4673
ENSMUSG00000032324	Tspan3	40.5589	40.6038	45.0413	48.551	42.7563	37.0669	60.8126	89.0081	52.3533
ENSMUSG00000032327	Stra6	1.02775	1.14724	0.882425	1.64022	0.392049	0.403824	0.26897	0.13115	0.355038
ENSMUSG00000032340	Neo1	8.87897	11.5807	9.86251	10.508	9.682	7.87643	6.22774	5.01039	7.98665
ENSMUSG00000032348	Gsta4	17.3115	9.26974	7.12456	34.0634	15.7696	10.2799	72.834	206.249	26.675
ENSMUSG00000032349	Elovl5	100.367	126.849	79.4568	101.209	58.6448	114.584	46.5343	36.0476	58.0254
ENSMUSG00000032355	Mlip	3.19583	3.70798	5.35789	4.6996	4.47773	5.02667	3.25713	0.705856	3.74584
ENSMUSG00000032366	Tpm1	469.837	726.152	858.136	716.214	809.37	784.612	411.615	129.651	538.449
ENSMUSG00000032369	Plscr1	1.99978	1.6092	1.83864	3.85386	2.62019	2.94085	2.87618	7.77178	2.26737
ENSMUSG00000032373	Car12	8.75377	6.25895	2.9789	6.53361	5.97031	4.62204	8.54094	9.59156	7.35354
ENSMUSG00000032381	Fam96a	23.5921	22.3345	24.8446	34.0667	27.6387	30.7418	31.5932	48.0499	32.8847
ENSMUSG00000032382	Snx1	46.2097	41.4156	42.5108	55.1021	44.3954	61.47	57.5303	88.0335	53.1285
ENSMUSG00000032420	Nt5e	19.0883	17.6833	19.6001	17.3805	14.4844	13.4279	11.8394	8.18208	14.7058
ENSMUSG00000032454	Rbp2	16.8162	8.89503	3.23405	21.503	17.734	5.7839	46.1627	46.5335	34.0818
ENSMUSG00000032482	Cspg5	0.645819	1.04331	0.903952	0.205201	0.232897	0.524021	0.150751	0.163347	0.210571
ENSMUSG00000032487	Ptgs2	3.92281	2.26202	0.608149	12.1765	10.3485	2.24969	20.4583	8.17699	4.83264
ENSMUSG00000032492	Pth1r	10.7008	17.8814	13.2272	17.6837	13.5819	22.6412	9.57351	7.36692	10.798
ENSMUSG00000032495	Lrrc2	6.88889	4.8953	5.96602	6.98534	5.83502	3.34957	4.58195	1.57916	4.32896
ENSMUSG00000032515	Csrnp1	4.99018	3.44736	3.00469	5.43359	6.87963	4.86546	9.34169	8.87221	5.41989
ENSMUSG00000032523	Hhatl	7.04277	11.6993	12.6409	10.3739	14.0257	15.3975	5.68713	0.791271	10.7103
ENSMUSG00000032527	Pccb	22.4998	25.4348	27.7615	23.2327	26.6695	32.948	19.1209	12.3306	21.713
ENSMUSG00000032528	Vipr1	1.19225	1.19132	1.95494	0.89283	1.20664	1.54711	0.523384	0.512233	0.536511
ENSMUSG00000032549	Rab6b	1.51103	2.66343	3.12612	1.29935	2.13728	2.43031	0.314056	0.197014	1.55154
ENSMUSG00000032649	Colgalt2	0.684614	0.841167	0.614604	0.847735	1.17892	1.70635	0.566171	0.361514	0.573357
ENSMUSG00000032661	Oas3	0.746328	0.978725	0.499122	2.34738	1.89623	3.44048	7.11018	21.9634	1.80875
ENSMUSG00000032690	Oas2	1.15446	2.03031	1.465	2.42901	1.75312	4.16772	5.47275	10.0466	2.25091
ENSMUSG00000032691	Nlrp3	2.58523	1.10808	0.32488	6.58659	6.32241	1.88471	15.8138	8.08305	2.95255
ENSMUSG00000032702	Kank1	31.991	29.2353	26.9329	20.3551	23.4518	33.289	18.2238	18.7348	22.9338
ENSMUSG00000032718	Mansc1	5.75864	4.5298	3.96917	5.2787	3.84803	3.05416	3.2339	2.51041	2.93129
ENSMUSG00000032719	Sbspon	1.41986	1.6995	1.42031	1.38265	1.4979	1.83063	0.713035	0.492485	1.16197
ENSMUSG00000032724	Abtb2	8.98443	10.3741	10.53	7.06752	7.58985	8.10316	6.93619	7.85021	5.39719
ENSMUSG00000032725	Folr2	20.3553	24.2343	29.0398	29.5134	32.5992	52.3121	41.2053	44.2863	50.7913
ENSMUSG00000032739	Pram1	0.269482	0.226706	0.195494	0.193044	0.0714455	0.183556	0.341888	0.946716	0.309526
ENSMUSG00000032802	Srxn1	12.5853	10.0952	8.55139	13.1431	11.7921	12.2848	16.4101	19.2968	15.1494
ENSMUSG00000032807	Alox12b	26.4492	16.028	19.0006	12.7373	26.5281	20.5585	26.7191	30.7445	39.7244
ENSMUSG00000032816	Igdcc4	1.63235	3.48593	2.53005	3.22187	3.47882	2.78883	2.60254	0.991571	1.71973
ENSMUSG00000032826	Ank2	4.62212	5.67762	7.0089	5.27472	4.44783	4.60254	3.94312	3.22144	3.77524
ENSMUSG00000032841	Prr5l	1.51092	1.15938	2.08819	0.923424	1.21219	1.62698	1.75009	3.55814	1.79398
ENSMUSG00000032849	Abcc4	15.5677	15.6249	19.3411	11.1082	15.3917	8.97478	16.512	8.84408	12.1546
ENSMUSG00000032854	Ugt8a	0.801943	1.44473	1.54272	0.930957	1.11368	1.27734	0.53293	0.181793	0.62723
ENSMUSG00000032883	Acsl3	5.89653	8.23517	6.23818	7.78133	6.22687	6.66498	4.29315	4.74891	4.37285
ENSMUSG00000032911	Cspg4	5.28599	9.56074	4.97014	5.63276	5.18692	9.59669	3.78855	3.06908	3.68423
ENSMUSG00000032925	Itgbl1	34.522	32.7256	30.5445	26.5748	27.7839	8.09833	20.3683	7.9787	26.1546
ENSMUSG00000032997	Chpf	9.81752	20.153	19.8385	14.1633	13.1856	5.9559	11.7206	5.02322	8.93198
ENSMUSG00000033006	Sox10	1.46075	2.08829	1.33933	1.55508	1.34829	1.73726	0.976184	0.694148	0.790432
ENSMUSG00000033065	Pfkm	157.036	181.375	214.803	204.512	207.433	159.888	114.718	27.9619	132.988
ENSMUSG00000033182	Kbtbd12	1.34656	2.3289	2.63535	2.14901	2.94113	2.44476	1.19817	0.372303	1.6884
ENSMUSG00000033196	Myh2	58.7458	96.2249	49.6053	93.7216	90.9934	96.2035	55.143	13.2681	47.8909
ENSMUSG00000033200	Tpsg1	0.635029	0.742566	0.821117	1.41315	1.2575	1.56082	0.559204	0.184413	0.832045
ENSMUSG00000033220	Rac2	2.65023	3.67481	3.80095	6.36376	4.52459	7.55046	6.9241	18.3283	4.46459
ENSMUSG00000033268	Duox1	2.34547	2.77149	2.81748	1.89469	1.89774	1.40834	2.3433	3.87673	2.42854
ENSMUSG00000033389	Arhgap44	3.9598	4.45009	3.13636	3.42611	2.96106	3.02896	2.67138	1.54085	2.40344
ENSMUSG00000033400	Agl	9.49101	17.0053	20.2443	14.155	18.6569	22.4419	8.01313	3.58945	15.7113
ENSMUSG00000033419	Snap91	3.72013	2.63135	2.05537	2.3368	1.28847	3.20698	1.33562	0.798463	1.35096
ENSMUSG00000033427	Upb1	1.61858	1.2464	0.879452	0.686967	0.652404	1.43669	0.516923	0.692774	0.571937
ENSMUSG00000033453	Adamts15	2.02583	4.49925	1.58291	7.13027	3.53167	6.55572	6.92477	5.96034	4.73685
ENSMUSG00000033538	Casp4	8.34665	7.10247	8.99556	11.7414	8.62683	8.67725	12.0746	21.0358	11.7577
ENSMUSG00000033542	Arhgef5	22.9662	18.3954	19.1646	16.3819	19.7351	19.1908	13.3634	11.9091	16.5991
ENSMUSG00000033544	Angptl1	12.0801	20.8288	14.55	29.2857	18.1579	8.63084	9.39698	2.63856	10.928
ENSMUSG00000033595	Lgi3	1.34693	1.85014	1.10497	0.805945	0.881072	1.05097	0.663659	0.521708	0.41988
ENSMUSG00000033685	Ucp2	16.3202	17.9976	19.1658	17.3658	16.7102	17.6613	25.0174	29.3545	19.0694
ENSMUSG00000033721	Vav3	20.2744	13.3548	11.2892	16.0341	15.4446	13.0189	23.4732	27.9896	18.7835
ENSMUSG00000033763	Mtss1l	2.13009	2.96576	2.64957	2.24857	2.02943	1.82579	1.84228	0.87453	0.917818
ENSMUSG00000033777	Tlr13	1.83561	1.92156	0.845074	5.60668	3.44873	3.91065	11.7137	46.6279	4.74545
ENSMUSG00000033852	Gm28042	2.47952	1.85161	1.40183	2.42466	2.29725	1.85875	4.127	5.56473	3.54669
ENSMUSG00000033880	Lgals3bp	11.6244	14.4788	14.1425	19.4206	19.7794	31.6472	51.6492	67.3323	28.2927
ENSMUSG00000034006	Pqlc1	26.1149	19.2563	17.9481	21.8234	22.909	22.3329	29.982	52.0898	29.367
ENSMUSG00000034109	Golim4	18.6914	23.3466	17.302	17.2758	14.8183	18.4249	13.6209	11.1235	13.8605
ENSMUSG00000034116	Vav1	3.23304	3.83221	3.53023	6.44436	4.54694	5.94843	8.47397	27.0639	4.7954
ENSMUSG00000034164	Emid1	3.58145	6.48367	3.28665	5.72491	5.11293	3.13248	3.40611	1.97144	2.54434
ENSMUSG00000034295	Fhod3	2.19285	3.27676	2.7592	3.24695	3.20452	2.04034	1.83718	0.698347	1.5718
ENSMUSG00000034324	Tmem132c	8.65479	7.84355	7.44308	8.07172	6.10163	8.16215	3.9495	2.38429	5.564
ENSMUSG00000034362	Csta1	143.839	62.1534	36.2711	348.828	303.454	58.3047	809.05	884.432	620.642
ENSMUSG00000034422	Parp14	7.50079	8.49068	8.47848	10.5979	9.76791	14.1144	14.7616	25.4279	9.54827
ENSMUSG00000034459	Ifit1	2.6793	3.39348	3.14887	12.2416	5.28653	13.3879	13.684	33.3987	5.63078
ENSMUSG00000034460	Six4	1.32559	1.70185	1.99586	2.10635	1.54392	1.2917	1.07299	0.462254	1.02385
ENSMUSG00000034462	Pkd2	21.2612	23.5524	26.9437	21.1888	21.9422	18.3422	15.7159	12.2965	19.4995
ENSMUSG00000034463	Scara3	16.1122	15.0279	16.6595	13.7315	18.0877	14.6885	12.1331	6.67291	13.7889
ENSMUSG00000034570	Inpp5j	0.142541	0.168116	0.284366	0.409503	0.36951	0.711999	0.515728	0.332631	0.42022
ENSMUSG00000034573	Ptpn13	23.7185	19.6641	17.9395	16.0384	16.7593	18.9293	13.4089	13.0455	16.1161
ENSMUSG00000034641	Cd300ld	5.9932	7.06852	6.08381	10.6586	8.43014	7.88905	16.6307	26.9202	11.2129
ENSMUSG00000034652	Cd300a	3.30067	3.10555	4.04025	6.09478	3.43482	4.29855	9.21163	18.0224	5.38321
ENSMUSG00000034656	Cacna1a	0.545455	1.00622	1.11336	0.999911	0.981933	0.983873	0.511651	0.311144	0.622794
ENSMUSG00000034663	Bmp2k	10.6592	9.62828	8.90271	9.97609	11.7632	10.8466	13.5677	17.9792	10.9164
ENSMUSG00000034675	Dbn1	4.18004	7.38208	5.9623	7.89927	6.90922	11.149	5.17967	4.08734	6.00037
ENSMUSG00000034687	Fras1	0.591059	2.1752	0.597132	1.49278	1.10495	1.01927	0.436057	0.16127	0.43147
ENSMUSG00000034708	Grn	37.0189	40.5166	37.7878	49.1455	48.1206	43.946	92.8266	127.291	54.2884
ENSMUSG00000034765	Dusp5	6.74996	5.3573	3.92355	8.51405	7.91498	5.66559	12.2989	12.9276	7.36253
ENSMUSG00000034898	Filip1	2.47524	3.319	3.84302	3.14057	3.86081	3.94418	2.15398	1.0495	3.06728
ENSMUSG00000034910	Pygo1	1.34112	1.94049	1.81675	1.6278	1.74531	1.59293	0.885491	0.59604	0.992617
ENSMUSG00000034919	Ttc22	7.18574	3.35763	1.9676	4.62604	6.7875	2.54703	9.06273	10.5565	8.76633
ENSMUSG00000034949	Zfr2	0.800846	1.14516	0.965754	0.812369	0.662316	0.70367	0.457181	0.267774	0.604079
ENSMUSG00000034981	Parm1	1.24799	1.94343	1.51273	1.62603	2.30351	3.91441	1.53505	0.946673	1.00594
ENSMUSG00000035004	Igsf6	3.71127	3.79904	3.64374	6.87426	4.77632	5.23409	8.11937	14.2098	4.75389
ENSMUSG00000035020	Epgn	5.63055	7.4723	4.38653	4.04818	8.58985	7.96235	13.3193	42.9052	16.8242
ENSMUSG00000035105	Egln3	14.1284	12.9899	8.44998	21.8643	19.3733	9.82041	22.9318	20.8432	21.4932
ENSMUSG00000035151	Elmod2	5.11617	4.24811	4.96464	7.1756	5.29785	9.10712	5.86367	6.16675	6.74509
ENSMUSG00000035168	Tanc1	23.0162	21.6621	17.2261	13.3286	18.5307	19.8779	12.003	9.19331	15.0972
ENSMUSG00000035208	Slfn8	2.46517	3.08266	2.97665	5.50281	3.96188	7.16433	8.03952	23.2187	4.3894
ENSMUSG00000035236	Scai	2.60263	2.52814	2.98401	2.70351	2.44644	2.54161	1.95985	1.35291	1.73108
ENSMUSG00000035273	Hpse	9.55488	9.14403	7.699	14.4587	14.0824	13.925	16.3161	15.0901	14.0323
ENSMUSG00000035296	Sgcg	9.32451	15.2982	16.6013	18.1875	17.5387	14.205	6.01886	1.33593	11.7153
ENSMUSG00000035299	Mid1	2.64494	2.44325	1.94541	1.57893	1.65352	1.11526	1.18758	1.44641	1.19718
ENSMUSG00000035352	Ccl12	1.0882	1.01548	0.775335	3.50653	2.44818	3.01178	4.21042	18.3534	2.07413
ENSMUSG00000035357	Pdzrn3	17.8934	20.8745	19.928	16.0725	13.5325	14.461	12.371	9.55247	14.195
ENSMUSG00000035373	Ccl7	7.45032	8.68112	5.30254	17.2553	12.4493	22.3288	28.7669	210.39	10.4206
ENSMUSG00000035376	Ptplb	24.8825	22.9667	16.4426	19.1017	15.334	17.6602	14.2304	12.888	14.5469
ENSMUSG00000035385	Ccl2	5.61311	4.44922	2.65216	11.7366	6.60533	13.3337	19.3926	211.839	6.76841
ENSMUSG00000035493	Tgfbi	331.334	254.195	393.274	229.229	276.278	158.653	295.323	449.994	239.806
ENSMUSG00000035606	Ky	2.40717	4.06168	5.97886	4.24218	5.46676	4.72735	2.02049	0.29959	3.2441
ENSMUSG00000035642	Aamdc	15.4956	24.8688	26.605	29.0786	26.4044	27.691	15.328	7.03254	20.5231
ENSMUSG00000035692	Isg15	1.99565	2.65831	1.28806	5.27266	4.22234	6.0564	12.6934	32.2681	4.36649
ENSMUSG00000035783	Acta2	53.0282	52.1756	48.0771	40.0801	34.4401	44.0786	43.3948	35.996	41.0254
ENSMUSG00000035805	Mlc1	1.8699	2.56819	2.00868	0	0	0	0.0148692	0.0483349	0
ENSMUSG00000035861	Tmprss11b	0.25019	0.127111	0.0083187	2.62862	1.03771	0	2.18975	1.38253	0.733359
ENSMUSG00000035877	Zhx3	9.06261	10.3814	11.8499	8.32868	10.3847	8.27998	8.29093	5.29362	7.92046
ENSMUSG00000036218	Pdzrn4	1.34496	0.732129	0.988535	0.395107	0.263785	0.732429	0.500036	0.224656	0.441221
ENSMUSG00000036278	Macrod1	6.07017	8.33516	6.03674	4.77605	9.30321	5.65832	4.88055	1.7764	4.75364
ENSMUSG00000036334	Igsf10	8.83653	15.6579	12.7503	13.8652	13.2788	12.7853	10.8787	6.81651	9.08411
ENSMUSG00000036353	P2ry12	3.87128	3.64798	3.87778	4.37391	4.23769	5.86732	7.44893	9.78398	6.01739
ENSMUSG00000036381	P2ry14	1.62973	1.44161	1.4834	3.57171	2.85171	2.39857	2.94827	4.31273	3.29455
ENSMUSG00000036437	Npy1r	2.22896	1.57238	1.93977	2.58755	3.29442	5.74541	2.55105	1.41395	2.62078
ENSMUSG00000036469	44621	3.63351	2.99539	4.2828	4.72739	4.8635	6.84075	6.72147	9.97797	5.71782
ENSMUSG00000036545	Adamts2	105.188	99.5057	120.333	70.2358	92.4489	42.6761	104.147	39.7291	62.0561
ENSMUSG00000036552-3	#N/A	0.653351	0.601871	0.501315	1.11382	0.635131	0.618634	1.4547	1.57625	0.863578
ENSMUSG00000036594	H2-Aa	394.044	429.265	584.026	498.683	493.403	558.413	326.954	215.519	405.934
ENSMUSG00000036596	Cpz	36.5347	61.8852	68.7484	33.8534	42.6925	6.18484	26.1716	12.4625	21.0018
ENSMUSG00000036617	Etl4	3.76219	4.20629	3.50997	3.46099	3.26296	3.31597	3.0243	1.72653	2.6752
ENSMUSG00000036699	Zcchc12	0.479061	0.709312	0.783686	0.113248	0.0558841	0.0205108	0.178281	0.0214642	0.135581
ENSMUSG00000036745	Ttll7	4.96103	4.81905	5.84442	5.61847	6.82346	5.57905	3.75237	2.006	4.93877
ENSMUSG00000036814	Slc6a20a	5.7877	3.28612	2.11926	4.1421	4.67196	3.07395	8.60338	7.91078	7.52353
ENSMUSG00000036815	Dpp10	0.480956	0.857349	0.569371	0.351397	0.588283	0.545913	0.838658	0.932413	0.75858
ENSMUSG00000036832	Lpar3	2.35945	1.86975	1.8572	1.84973	1.5135	1.92417	1.14487	0.665209	1.36277
ENSMUSG00000036853	Mcoln3	0.806226	1.3299	0.792015	2.03343	0.878741	1.24213	0.479854	0.862019	0.493881
ENSMUSG00000036856	Wnt4	8.02707	5.72559	4.15102	5.00152	6.58773	3.9537	9.7878	9.10886	7.19696
ENSMUSG00000036879	Phkb	21.2009	24.0343	32.1841	25.8343	29.1619	31.6289	16.4101	8.94092	24.2268
ENSMUSG00000036887	C1qa	109.879	133.252	140.394	175.018	155.344	248.213	204.764	224.978	241.853
ENSMUSG00000036896	C1qc	51.1052	59.2146	57.9451	77.5479	69.3391	98.2309	85.4129	83.5136	96.9359
ENSMUSG00000036905	C1qb	95.3212	120.363	114.984	163.357	133.735	227.816	165.55	223.431	202.816
ENSMUSG00000036908	Unc93b1	18.971	24.6025	23.0895	32.284	27.118	30.6824	42.4605	60.696	29.9959
ENSMUSG00000036931	Nfkbid	1.30723	0.869722	0.59402	2.01725	2.2168	1.04164	4.92489	3.95348	1.42407
ENSMUSG00000037016	Frem2	3.78679	5.53807	2.53543	3.47445	2.26922	3.16833	1.20319	0.719046	1.13712
ENSMUSG00000037095	Lrg1	12.4595	13.7345	35.8454	15.0381	19.656	63.4463	49.8871	60.28	29.1092
ENSMUSG00000037111	Setd7	12.8632	14.0095	16.2781	12.6554	14.0976	11.1821	10.1546	7.44816	11.6604
ENSMUSG00000037138	Aff3	7.76629	6.69305	9.37452	4.7302	7.59503	15.2852	4.54434	2.45456	6.3351
ENSMUSG00000037169	Mycn	0.749351	4.92754	0.852114	3.41002	1.26751	1.8127	0.480274	0.503617	0.27267
ENSMUSG00000037279	Ovol2	1.37143	1.91565	1.34218	1.65669	1.43381	1.60642	0.534985	0.637654	0.784638
ENSMUSG00000037280	Galnt6	6.43256	3.9002	1.87556	6.55043	6.38786	3.45319	10.9463	20.8619	11.6932
ENSMUSG00000037348	Paqr7	114.519	103.82	75.6291	87.6742	57.2746	106.422	32.6987	24.2998	48.6669
ENSMUSG00000037440	Vnn1	0.613047	0.487039	4.99122	0.783364	0.241602	0.230552	2.3294	1.16922	1.40676
ENSMUSG00000037465	Klf10	11.0062	11.5666	13.833	12.7924	10.6175	10.4848	16.1763	19.1233	12.2633
ENSMUSG00000037469	Papl	8.20369	4.7367	5.01987	7.10723	9.24077	6.38689	11.7904	12.2007	12.5967
ENSMUSG00000037490	Slc2a12	7.32016	8.28321	9.71653	7.77799	7.1347	9.48045	3.53532	2.43186	4.9035
ENSMUSG00000037577	Ephx3	25.6314	17.578	14.7303	15.9438	20.671	17.209	22.1226	23.1455	29.8527
ENSMUSG00000037580	Gch1	5.14985	4.38165	4.67646	5.41354	4.90807	5.51222	6.51659	9.61406	6.96953
ENSMUSG00000037605	Lphn3	2.66869	2.61877	1.54586	1.75634	1.26223	1.6588	0.946383	0.998649	1.24589
ENSMUSG00000037661	Gpr160	10.4849	7.55709	6.32678	9.72186	8.55667	7.72426	14.4181	11.4906	11.9879
ENSMUSG00000037669	1110057K04Rik	24.5599	23.5355	22.4946	20.9937	17.031	38.5906	13.549	13.113	17.5441
ENSMUSG00000037731	Themis2	4.15728	4.82775	4.57954	6.80102	6.267	7.95806	11.3729	25.8477	5.0546
ENSMUSG00000037736	Limch1	6.64244	8.24355	9.33937	7.98858	8.8759	10.6526	4.91558	2.38065	6.49052
ENSMUSG00000037813	D630003M21Rik	0.859987	1.90597	0.939524	2.28912	1.14453	1.30404	0.444502	0.286692	0.703673
ENSMUSG00000037849-3	#N/A	0.187672	0.449499	0.1872	0.610017	0.52907	1.00439	1.57143	1.42946	0.550105
ENSMUSG00000037887	Dusp8	1.24157	2.15002	1.87015	1.68256	1.80637	1.80165	0.973368	0.840025	0.766438
ENSMUSG00000037921	Ddx60	3.40712	4.61848	3.33859	5.69856	5.46173	7.9516	6.66434	11.0301	4.09204
ENSMUSG00000037922	Bank1	1.26944	1.55646	2.71689	1.45675	1.74921	2.7439	0.687986	0.828301	1.22081
ENSMUSG00000037944	Ccr7	1.43688	0.594887	0.706543	0.956829	1.21975	1.1914	1.58997	2.49356	1.75918
ENSMUSG00000037953	A4gnt	2.52409	3.45223	2.23941	2.94845	1.59059	3.10899	0.970278	1.32129	1.9487
ENSMUSG00000037962	Fam101a	0.925104	1.5022	0.93842	1.17377	1.1127	0.486708	0.615934	0.456642	0.396212
ENSMUSG00000037966	Ninj1	10.055	13.6061	13.8382	15.6269	14.3737	18.9106	20.1144	20.1216	18.8044
ENSMUSG00000037977	6430571L13Rik	0.893328	1.6433	1.85898	1.24402	1.94645	2.30804	0.812018	0.155271	1.07419
ENSMUSG00000037989	Wnk2	1.64683	1.96697	1.84471	1.1654	1.66308	1.72278	1.15697	0.507428	1.4814
ENSMUSG00000038067	Csf3	0.519875	0.226395	0.0207427	0.921724	0.929893	0.178066	3.78341	2.70197	0.672601
ENSMUSG00000038094	Atp13a4	3.18842	1.06344	0.864042	1.9515	3.41304	1.11458	4.58202	5.08874	5.33708
ENSMUSG00000038112	AW551984	1.49735	2.32143	1.68265	3.2391	3.01252	4.69655	2.47855	1.82582	2.7683
ENSMUSG00000038119	Cdon	9.00468	12.7929	10.7153	10.7184	11.5741	9.78756	6.7028	4.12703	9.2588
ENSMUSG00000038132	Rbm24	4.8839	7.05745	8.01674	8.70898	8.55229	8.44906	5.77808	2.93903	6.55224
ENSMUSG00000038143	Stox2	2.63216	3.24046	2.40768	2.56347	2.65233	2.87285	1.90201	1.48453	1.88966
ENSMUSG00000038147	Cd84	3.08824	2.95446	2.83792	6.67774	4.4488	6.00203	7.55628	15.2586	4.68958
ENSMUSG00000038170	Pde4dip	46.472	60.4439	58.1288	50.521	67.7146	60.6392	34.3816	10.286	42.7816
ENSMUSG00000038204	Asb10	2.22929	3.33151	3.21814	2.34585	3.27088	2.25277	1.63177	0.201627	2.26728
ENSMUSG00000038205	Prkab2	5.88846	8.0091	9.90086	8.08706	8.3847	10.0264	5.56751	3.77156	7.35511
ENSMUSG00000038233	Fam198a	3.69337	3.7927	4.35173	3.32814	3.99017	1.6141	2.74262	0.605196	3.17071
ENSMUSG00000038239	Hrc	14.6069	22.0086	24.545	20.7467	25.0739	21.9513	10.7514	1.62234	14.4838
ENSMUSG00000038298	Pdzk1	2.57452	3.99347	2.11353	2.24413	1.32888	2.02408	1.20116	0.842161	1.17446
ENSMUSG00000038301	Snx10	11.516	10.0584	12.1091	15.7432	12.8444	21.0975	14.9032	22.0944	13.4577
ENSMUSG00000038352	Arl5c	2.29327	2.13605	2.00793	4.01572	3.26967	3.16376	4.4779	5.42288	3.27089
ENSMUSG00000038393	Txnip	376.061	246.193	428.069	262.365	219.815	250.869	359.299	258.548	417.121
ENSMUSG00000038403	Hfe2	15.9495	32.7351	45.6881	31.8424	37.1342	36.8976	14.8167	3.39939	29.2247
ENSMUSG00000038412	Higd1a	22.0535	15.3475	13.5662	19.7653	20.8474	16.8767	24.4001	22.6208	26.3335
ENSMUSG00000038418	Egr1	2.33047	2.87872	1.00137	2.88701	4.46126	3.64575	4.97573	2.29916	1.53111
ENSMUSG00000038524	Fchsd1	3.67812	3.34856	2.54909	2.69694	3.19404	2.95026	4.45323	6.04187	3.68081
ENSMUSG00000038540	Tmc3	1.12807	0.856149	1.1036	0.876088	0.790828	0.859148	0.527004	0.309819	0.542698
ENSMUSG00000038587	Akap12	16.1878	18.6147	29.7874	12.7053	18.3103	7.29444	13.9638	5.83822	12.8175
ENSMUSG00000038623	Tm6sf1	4.86935	5.63854	6.02328	5.94779	5.44387	7.96501	8.56264	13.2853	6.51113
ENSMUSG00000038633	Degs1	75.1629	39.0617	35.7007	52.6431	46.2219	43.538	69.313	80.2929	56.2338
ENSMUSG00000038641	Akr1d1	1.21619	0.565148	0.133148	3.28699	3.7775	0.0952511	3.98632	2.02679	2.17372
ENSMUSG00000038642	Ctss	142.366	126.047	105.026	261.165	162.606	183.911	327.078	837.937	195.766
ENSMUSG00000038650	Rnh1	68.004	48.853	46.7794	58.3034	54.1265	52.6826	80.9157	124.446	72.1661
ENSMUSG00000038663	Fsd2	4.56322	5.60372	6.67784	5.08222	5.74972	6.02726	3.50124	0.957792	4.65449
ENSMUSG00000038665	Dgki	1.00248	1.12129	0.76709	0.764239	0.62743	1.11711	0.475563	0.399933	0.437231
ENSMUSG00000038677	Scube3	0.41829	1.58086	0.447042	1.09477	0.638982	0.626812	0.30886	0.22088	0.308034
ENSMUSG00000038725	Pkhd1l1	1.08847	1.00759	1.30962	1.58396	1.22251	1.0005	0.724701	0.272084	0.559414
ENSMUSG00000038751	Ptk6	5.84627	3.28799	3.55837	4.75553	3.89881	3.48471	5.78576	6.58731	6.20325
ENSMUSG00000038768	9130409I23Rik	7.8036	3.00796	1.07293	4.50799	2.43981	0.586947	4.49131	5.26819	4.41278
ENSMUSG00000038776	Ephx1	20.3996	22.6276	22.9088	23.1341	17.0386	17.9135	13.5599	7.46045	17.4189
ENSMUSG00000038777	Sema6c	2.23218	3.69766	2.65442	2.53493	3.78673	2.41735	1.90029	0.509865	2.02616
ENSMUSG00000038811	Gngt2	7.3354	6.92123	6.82917	14.5882	9.91526	10.7679	11.9882	16.9025	13.3458
ENSMUSG00000038843	Gcnt1	4.03303	3.81016	3.71536	6.049	5.23281	8.26796	6.60684	13.3191	7.10008
ENSMUSG00000038859	Baiap2l1	2.84227	2.49931	1.87357	1.85008	25.2728	2.1381	21.5638	20.0705	1.82819
ENSMUSG00000038910	Plcl2	5.93042	6.85459	7.06904	8.84969	9.05111	10.1881	8.80753	13.6287	8.08225
ENSMUSG00000039013	Siglecf	0.522068	0.150452	0.50544	1.28557	0.806044	1.26553	0.809526	3.50867	1.25714
ENSMUSG00000039037	St6galnac5	1.74327	2.03194	4.97102	1.05324	1.73245	2.1434	2.26434	3.59319	3.47166
ENSMUSG00000039055	Eme1	0.927069	0.634046	0.557214	1.53362	0.912769	0.254437	1.86755	1.77065	1.2494
ENSMUSG00000039114	Nrn1	15.3735	10.678	14.4703	9.61581	11.7075	15.5031	8.88927	4.85433	11.6888
ENSMUSG00000039126	Prune2	2.44408	2.9705	1.75831	3.77731	2.35161	6.3528	3.49904	5.91291	3.36124
ENSMUSG00000039208	Metrnl	23.6043	23.8876	21.8586	21.8304	23.458	22.9019	29.5388	40.8546	28.462
ENSMUSG00000039221	Rpl22l1	127.779	105.633	101.378	147.468	133.3	125.278	155.624	147.359	184.42
ENSMUSG00000039232	Stx11	2.88718	2.80345	1.51224	4.04065	3.77111	1.77784	7.89363	7.59174	3.33515
ENSMUSG00000039239	Tgfb2	10.1954	8.33115	8.97561	4.40844	7.0891	3.11554	5.53257	1.1569	5.9632
ENSMUSG00000039323	Igfbp2	56.1304	70.3517	57.9077	64.7864	42.4395	35.4952	27.2087	17.0184	36.6567
ENSMUSG00000039347	Atp6v0e2	5.04749	5.66172	6.82206	5.53129	5.62894	5.7301	3.5463	1.34614	3.82084
ENSMUSG00000039431	Mtmr7	0.421199	1.26848	0.267362	1.36316	0.404136	1.14173	0.163986	0.23896	0.27645
ENSMUSG00000039533	Mmd2	0.350719	0.460826	0.446345	0.0357365	0.0117565	0.310674	0.0250037	0.0135464	0.0122239
ENSMUSG00000039542	Ncam1	2.54356	3.90361	1.74955	4.59637	2.39713	2.59784	1.15747	1.33392	1.26911
ENSMUSG00000039607	Rbms3	9.279	9.07047	10.0194	7.00913	9.48078	8.81016	6.38649	5.20483	8.07289
ENSMUSG00000039628	Hs3st6	9.93324	8.25642	8.30634	5.91733	7.02534	9.32705	2.9514	1.73225	6.97399
ENSMUSG00000039661	Dusp26	1.69375	1.66408	2.96692	1.24107	1.24493	1.90137	1.36656	0.393322	1.21091
ENSMUSG00000039774	Galnt12	5.16125	4.22857	4.60728	2.67113	3.70771	2.5094	3.61723	2.9592	4.10271
ENSMUSG00000039813	Tbc1d2	2.31926	1.76748	1.45283	1.97375	1.70446	1.53912	2.80988	5.14372	2.47549
ENSMUSG00000039835	Nhsl1	5.06115	5.6463	4.71557	4.24104	4.33429	4.88647	3.59815	2.61131	3.26051
ENSMUSG00000039853	Trim14	1.87794	2.13851	2.4761	3.26363	2.48655	4.12414	5.25492	7.28976	2.77087
ENSMUSG00000039883	Lrrc17	9.06626	20.0302	10.752	23.8379	14.1962	14.9198	11.3565	7.72396	11.4473
ENSMUSG00000039891	Txlnb	10.2159	11.2516	15.0231	12.9151	14.8049	11.577	6.68495	1.42759	10.1253
ENSMUSG00000039936	Pik3cd	3.93237	5.44344	4.45111	6.1353	5.97298	8.16331	8.3048	21.1719	5.05377
ENSMUSG00000039987	Phtf2	11.3322	12.5133	14.3895	13.5807	14.3611	14.8357	8.40814	5.75412	12.687
ENSMUSG00000040026	Saa3	65.4237	53.1421	0.475354	183.869	158.105	10.3474	996.594	1087.11	246.621
ENSMUSG00000040055	Gjb6	4.90346	3.55259	1.54915	12.1691	7.46389	1.83043	20.4019	30.6091	13.2989
ENSMUSG00000040118	Cacna2d1	9.72364	12.6742	13.643	13.261	14.2699	16.6755	8.71151	3.3605	10.007
ENSMUSG00000040127	Sdr9c7	15.8624	8.35613	10.5691	11.1558	16.3785	10.9806	19.752	19.9695	20.2968
ENSMUSG00000040152	Thbs1	31.7143	18.8264	11.1252	45.3304	38.0689	17.3192	93.9712	123.857	28.7315
ENSMUSG00000040209	Zfp704	3.92471	4.69766	4.58132	3.60585	3.74157	3.08004	3.30259	1.82386	2.61342
ENSMUSG00000040212	Emp3	18.7562	24.0903	21.5825	31.0012	20.183	33.4829	31.6975	42.0183	25.7304
ENSMUSG00000040247	Tbc1d10c	1.10927	1.19016	1.01027	2.78697	1.65658	1.60031	1.37937	3.1153	1.6412
ENSMUSG00000040253	Gbp7	8.84593	7.28968	7.13237	10.3903	9.35675	11.2138	11.7923	18.2248	11.1946
ENSMUSG00000040254	Sema3d	14.9661	13.7005	17.5737	11.434	14.125	13.5224	5.70489	2.44787	8.29575
ENSMUSG00000040270	Bach2	0.788709	1.51616	0.863152	1.21191	0.674708	0.988928	0.563737	0.49473	0.441875
ENSMUSG00000040287	Stac3	5.64583	10.6068	13.7233	11.4233	13.077	14.0933	4.48786	0.981702	10.0123
ENSMUSG00000040296	Ddx58	5.64218	5.88561	5.60445	9.06866	6.95357	10.377	10.8842	21.5688	6.80053
ENSMUSG00000040310	Alx4	0.602017	1.50994	0.250844	1.52373	0.696348	1.01959	0.189063	0.136573	0.284992
ENSMUSG00000040328	Olfr56	7.44175	6.5569	7.17616	12.9372	10.8273	15.0477	14.891	37.0575	10.5739
ENSMUSG00000040345	Arhgap9	8.68971	10.1554	10.0235	12.9403	11.2698	12.7836	15.2199	25.2333	12.5088
ENSMUSG00000040350	Trim7	8.73888	9.0057	10.4988	9.46743	10.2218	11.6352	7.61731	3.79719	8.43283
ENSMUSG00000040389	Wdr47	10.2683	9.29011	10.2331	8.87206	8.72846	9.93541	5.92978	5.72431	7.17798
ENSMUSG00000040483	Xaf1	2.37377	3.05419	2.50618	4.44851	3.47634	5.65905	7.87148	14.9692	4.17543
ENSMUSG00000040488	Ltbp4	14.2351	20.428	16.415	15.0306	18.6739	19.339	10.6889	6.79852	11.0521
ENSMUSG00000040522	Tlr8	4.89163	4.96312	3.78943	8.16098	6.41532	7.12569	10.4275	15.0111	7.75287
ENSMUSG00000040528	Milr1	2.98443	2.68408	3.75353	4.72896	2.90121	4.5486	7.07569	12.3906	4.09858
ENSMUSG00000040552	C3ar1	5.82804	6.33539	5.91877	12.9986	8.99464	9.27239	22.5607	62.6479	10.0018
ENSMUSG00000040613	Apobec1	8.29363	10.9191	8.30777	16.8563	12.1191	13.9258	27.7868	74.1223	15.0821
ENSMUSG00000040650	Cyp2b23	3.36482	2.92663	3.2834	3.65653	1.01329	0.978691	1.62575	1.04467	1.07206
ENSMUSG00000040666	Sh3bgr	18.6364	28.9	30.106	34.1462	33.1697	29.7108	15.1929	3.76767	19.909
ENSMUSG00000040690	Col16a1	49.6175	61.4482	49.036	48.7912	46.4092	38.1622	34.6291	19.9386	32.7059
ENSMUSG00000040694	Apobec2	68.7832	45.0722	58.3063	56.9347	64.202	66.9036	42.1244	7.748	47.2105
ENSMUSG00000040710	St8sia4	3.609	4.3029	4.13355	6.79111	6.90028	6.61487	6.80536	8.68423	5.55247
ENSMUSG00000040724	Kcna2	1.15093	1.18141	1.01683	0.809748	1.11883	0.973798	0.589216	0.319224	0.598276
ENSMUSG00000040740	Slc25a34	2.96854	2.36676	3.24523	1.06326	1.10766	2.61576	1.75133	0.705328	2.45495
ENSMUSG00000040747	Cd53	34.1016	32.5982	30.8986	62.177	44.6774	63.3114	81.6694	178.814	52.423
ENSMUSG00000040774	Cept1	17.9328	16.7076	16.3289	20.4343	18.648	21.3943	22.7866	29.3294	21.6088
ENSMUSG00000040809	Chil3	1.45659	0.424766	0.181617	3.20251	1.69411	3.9534	22.5862	110.48	4.83746
ENSMUSG00000040852	Plekhh2	2.26137	2.32271	2.04694	1.94112	1.41279	2.20893	1.1478	1.11999	1.42196
ENSMUSG00000040896	Kcnd3	0.530462	0.431615	0.462292	0.175999	0.173699	0.292859	0.190483	0.181381	0.2314
ENSMUSG00000040998	Npnt	4.21677	6.94481	3.81779	4.8389	4.0428	4.99233	3.08303	1.96726	3.30757
ENSMUSG00000041075	Fzd7	11.9916	14.6883	11.2886	11.5067	10.662	10.3975	8.04814	7.44052	9.49763
ENSMUSG00000041193	Pla2g5	8.81235	6.55038	11.3161	8.38072	6.63665	3.3393	6.97363	4.56102	4.77098
ENSMUSG00000041202	Pla2g2d	2.91869	1.36756	4.2749	1.1827	1.68801	1.50271	3.49457	1.61394	2.74471
ENSMUSG00000041329	Atp1b2	0.38478	1.76231	1.1382	0.771074	1.62518	1.71843	0.64465	0.22293	0.898541
ENSMUSG00000041372	B4galnt3	1.74239	1.36885	0.713031	0.924124	1.29672	0.792453	1.65603	2.98114	1.60632
ENSMUSG00000041423	Paqr6	1.70785	2.19946	1.78666	1.84633	1.39702	1.56051	1.16263	0.629888	0.926271
ENSMUSG00000041440	Gk5	18.1404	12.4929	10.2179	10.6991	8.54079	11.727	5.95399	5.20201	6.804
ENSMUSG00000041559	Fmod	3.24605	4.72127	1.86851	3.96821	1.59647	2.05996	1.56505	0.747311	1.15418
ENSMUSG00000041608	Entpd3	1.42966	1.0756	1.50722	0.641127	0.632748	0.646937	2.07867	1.86177	0.469932
ENSMUSG00000041650	Pcca	6.14663	8.9953	10.7527	6.87579	11.6952	12.464	6.59351	5.34535	7.08695
ENSMUSG00000041660	Bbox1	24.1771	13.9394	19.8757	17.1708	17.1589	24.3793	10.1861	5.69663	15.2106
ENSMUSG00000041695	Kcnj2	13.2979	12.7079	13.3506	16.371	17.3176	12.7479	7.09262	6.12242	10.1189
ENSMUSG00000041707	1810011H11Rik	0.541536	0.660318	0.993922	0.320043	0.40009	0.672384	1.72421	3.10571	0.788205
ENSMUSG00000041735	Gm13178	16.2654	12.6579	9.18483	13.8541	8.76772	12.5139	5.89398	5.31834	8.71974
ENSMUSG00000041736	Tspo	60.3467	56.7169	70.355	70.6419	67.0925	86.2022	95.9897	125.438	90.295
ENSMUSG00000041754	Trem3	0.826078	0.477779	0.0686668	3.15299	2.71863	0.359208	7.6144	4.84821	1.25245
ENSMUSG00000041782	Lad1	27.8325	20.8472	16.0588	16.4869	18.5206	17.7398	23.5477	31.7178	25.7151
ENSMUSG00000041827	Oasl1	0.789227	1.79839	0.933708	3.27222	2.23028	6.7188	8.29139	24.0949	2.63434
ENSMUSG00000041842	Fhdc1	6.84001	6.8557	6.34089	4.68938	5.67298	5.8861	4.07974	3.63623	5.20717
ENSMUSG00000041870	Ankrd13a	29.7239	28.5733	26.8239	30.4975	28.8008	31.0777	42.1158	50.4601	34.6157
ENSMUSG00000041889	Shisa4	13.0331	16.6611	15.0841	17.2657	17.6581	12.9052	8.33255	2.06009	9.50138
ENSMUSG00000041926	Rnpep	20.4176	20.381	19.9649	25.7979	22.4164	26.2364	33.8934	51.6978	26.5261
ENSMUSG00000041984	Rptn	32.5509	27.5088	10.3387	132.02	94.7661	17.0209	165.167	156.763	141.619
ENSMUSG00000042010	Acacb	29.7232	29.474	23.1656	17.6985	21.1071	19.8982	19.2596	10.9809	15.056
ENSMUSG00000042121	Ssh1	2.01196	2.41772	2.99142	1.62653	1.97891	1.4577	1.99155	2.08886	1.41969
ENSMUSG00000042124	Lce1f	21.0092	9.19182	7.17316	10.9754	16.7251	7.17183	24.2299	17.3197	31.5056
ENSMUSG00000042155	Klhl23	3.28644	4.30429	4.79814	4.12142	4.21168	3.92324	1.93282	1.50385	3.50497
ENSMUSG00000042212	Sprr2d	0.67713	0.390277	0.158924	5.76727	1.39393	0	10.6232	22.2186	4.95197
ENSMUSG00000042228	Lyn	9.04753	10.3726	10.2218	13.753	13.1066	20.9991	24.8869	54.9145	14.1234
ENSMUSG00000042244	Pglyrp3	4.30956	4.37792	3.52677	4.75304	5.84152	3.63827	5.92951	10.2833	6.50324
ENSMUSG00000042254	Cilp	61.8914	115.39	95.4834	156.065	109.705	184.048	49.0734	28.5249	67.0196
ENSMUSG00000042258	Isl1	1.43193	1.73215	2.23772	2.25669	2.53652	1.61784	1.56248	0.338607	1.27044
ENSMUSG00000042268	Slc26a9	1.0659	0.781685	0.509459	0.707219	1.25204	0.586296	1.66045	2.00646	1.82554
ENSMUSG00000042286	Stab1	15.809	27.9607	19.9424	32.5431	30.6	32.7393	40.0671	41.5538	23.5463
ENSMUSG00000042306	S100a14	221.486	134.827	122.147	156.178	150.718	123.774	196.626	195.745	223.553
ENSMUSG00000042436	Mfap4	17.4439	58.4986	37.7995	49.6947	32.8518	25.4193	19.1098	6.9277	14.2814
ENSMUSG00000042453	Reln	6.58938	5.22645	6.34172	6.22197	5.76639	5.35361	5.2127	2.14099	4.23932
ENSMUSG00000042476	Abcb4	6.79946	6.65375	8.62498	6.36831	8.0044	8.09825	4.20514	1.40878	6.17743
ENSMUSG00000042500	Ago4	5.4868	5.04011	4.97824	5.05458	4.35156	4.83071	3.39936	2.68881	3.4414
ENSMUSG00000042515	Mum1l1	0.359471	0.571981	0.689554	0.735384	0.851216	0.917518	0.32396	0.423299	0.36334
ENSMUSG00000042532	Golga7b	1.74415	3.31913	1.31543	4.30189	1.46117	1.66957	0.615659	0.270017	0.773965
ENSMUSG00000042644	Itpr3	25.9641	29.605	22.6609	17.3199	22.5909	21.047	15.2866	14.9429	15.3698
ENSMUSG00000042686	Jph1	5.4689	9.73299	11.8818	9.49452	10.9484	12.3489	5.12853	1.82749	9.70092
ENSMUSG00000042688	Mapk6	20.4853	19.8817	17.3657	22.6275	26.347	23.2343	30.5884	46.6893	26.0799
ENSMUSG00000042750	Bex2	1.99487	2.55791	1.37079	0.349318	0.387847	0.284698	0.0916524	0	0.17923
ENSMUSG00000042793	Lgr6	6.53024	8.42794	3.73065	5.41473	4.05703	5.11522	2.11109	1.76881	2.5322
ENSMUSG00000042810	Krba1	2.59913	2.8541	2.98056	2.07387	2.5121	2.59388	2.07601	1.0263	1.9656
ENSMUSG00000042845	Wfdc12	10.3821	13.8897	5.40984	27.1681	20.4361	0.829299	32.8913	41.3673	15.2969
ENSMUSG00000042961	Egflam	3.2842	4.48762	3.84422	3.87031	3.25776	3.38975	2.8234	1.37012	2.67596
ENSMUSG00000042988	Notum	3.29364	2.12782	0.956725	1.10516	0.47499	1.62711	0.187075	0.648661	1.04263
ENSMUSG00000043004	Gng2	5.57663	6.11683	5.7609	8.65672	8.65547	9.13833	9.79907	14.286	8.15357
ENSMUSG00000043008	Klhl6	2.4725	1.87256	2.45288	3.9972	3.03056	5.22105	4.22284	11.8155	3.73509
ENSMUSG00000043091	Tuba1c	29.0843	21.5025	14.6753	24.3052	18.7958	19.927	30.1308	56.648	28.3279
ENSMUSG00000043154	Ppp2r3a	21.5961	19.4014	19.5765	18.6397	20.5982	19.9713	13.6778	7.44668	17.5058
ENSMUSG00000043252	Tmem64	14.3824	16.9759	15.6168	19.1848	15.0811	18.4683	9.39661	5.49407	12.5222
ENSMUSG00000043263	Pyhin1	3.5819	4.49763	4.37195	8.96121	5.71807	10.1422	15.58	33.9687	7.21778
ENSMUSG00000043286	Pnpla1	10.6884	6.14391	5.67371	6.59647	8.99284	5.61036	9.60912	9.78189	11.6519
ENSMUSG00000043472	Lce3d	1.57116	1.63615	0	10.4293	6.04296	0.36559	22.7384	76.6696	30.3804
ENSMUSG00000043557	Mdga1	0.393631	1.34835	0.646422	0.851094	1.02663	0.72448	0.342402	0.290357	0.514317
ENSMUSG00000043587	Pxylp1	3.66165	4.49597	3.96826	4.52868	4.60331	3.30047	2.33373	2.69834	1.98967
ENSMUSG00000043613	Mmp3	202.668	134.67	109.196	189.625	145.938	29.8357	296.411	312.973	163.037
ENSMUSG00000043631	Ecm2	14.2643	23.2492	24.4624	23.9779	20.0351	13.0684	11.5164	4.65418	13.4363
ENSMUSG00000043702	Pde12	7.20062	4.91633	3.69084	5.27649	5.29838	5.31099	8.27797	9.19329	6.90884
ENSMUSG00000043727	F830045P16Rik	1.10228	0.710559	1.33099	0.957161	1.02925	1.39719	0.299863	0.0487377	0.249217
ENSMUSG00000043740	B430306N03Rik	0.160282	0.174498	0.169871	0.74004	0.262932	0.847077	1.26339	4.7801	0.334139
ENSMUSG00000043822	Adamtsl5	7.29981	8.34895	8.37675	5.93559	7.4805	4.95511	5.51203	3.06993	5.2208
ENSMUSG00000043832	Clec4a3	7.70801	7.35437	7.67645	12.4292	9.90365	11.9245	16.8454	38.8593	11.1
ENSMUSG00000043924	Ncmap	0.758189	1.42779	1.31839	1.43306	1.66333	1.97402	1.08033	0.378725	0.787062
ENSMUSG00000043991	Pura	8.12769	9.28899	10.563	8.08218	10.276	8.25229	7.83701	5.1011	6.18168
ENSMUSG00000044086	Lmod3	9.37917	9.71506	12.4585	11.0643	12.9204	11.0481	5.55429	1.60138	9.35308
ENSMUSG00000044103	Il1f9	20.631	8.94182	8.7349	16.6987	19.1639	10.2186	26.9113	30.625	28.2705
ENSMUSG00000044156	Hepacam2	1.48851	1.717	2.28018	1.29162	2.15328	2.33298	0.384685	0.238187	1.66573
ENSMUSG00000044165	Bcl2l15	1.66267	0.962356	0.482852	1.2231	1.08435	0.630767	1.60999	3.67762	1.63802
ENSMUSG00000044206	Vsig4	0.559083	0.121735	0.669214	0.440551	0.625015	0.628344	2.34069	1.22117	1.52577
ENSMUSG00000044294	Krt84	0.237217	0.236736	0.295776	0.194713	0.288252	0.190432	1.85959	2.0814	1.75831
ENSMUSG00000044345	Marveld1	18.28	23.2764	24.068	16.5159	17.0199	14.6697	17.1648	11.2255	15.5971
ENSMUSG00000044433	Camsap3	9.18348	8.47748	6.12691	4.55608	6.24843	7.0809	5.41812	4.32322	5.82137
ENSMUSG00000044461	Shisa2	8.12069	14.1815	9.88312	11.979	9.29177	13.5996	7.36043	2.54605	7.15754
ENSMUSG00000044499	Hs3st5	0.510357	0.455898	0.952884	0.567143	0.6615	0.896442	0.162332	0.0879477	0.555531
ENSMUSG00000044583	Tlr7	2.90395	4.05136	4.01887	7.76652	7.44068	6.01074	9.31397	15.0144	6.0648
ENSMUSG00000044594	Serpinb3a	0.321231	0.511135	0.147888	18.6924	2.20993	0.317386	9.06807	17.2435	3.07205
ENSMUSG00000044734	Serpinb1a	12.2612	18.1349	16.5553	30.0934	18.8591	34.5151	27.7889	33.3184	20.8115
ENSMUSG00000044748	Defb1	38.2563	23.0521	24.2319	38.2174	28.6779	28.0543	49.6928	40.6401	42.3122
ENSMUSG00000044786	Zfp36	4.44548	3.71851	3.6376	4.83421	4.66886	4.53331	9.2996	9.58222	4.35523
ENSMUSG00000044788	Fads6	4.22205	3.94297	4.09958	2.95655	2.72552	3.14222	2.87785	1.82517	3.1006
ENSMUSG00000044811	AF251705	2.95306	3.18393	2.71796	8.02357	4.65969	4.44352	11.267	26.4302	3.82117
ENSMUSG00000044827	Tlr1	1.46924	1.27684	0.784197	3.32598	1.7039	2.22099	4.14344	17.0058	1.70651
ENSMUSG00000044864	Ankrd50	8.27376	9.71127	6.93158	8.40238	6.68396	5.87289	6.54857	5.84294	4.79066
ENSMUSG00000044938	Klhl31	14.3673	30.3586	34.3053	25.5748	39.6141	36.7261	10.4678	1.72377	24.2033
ENSMUSG00000044949	Ubtd2	9.17729	11.0552	12.8628	11.312	10.5713	6.69289	8.08176	5.37439	7.4565
ENSMUSG00000044966	Fbxo48	0.487538	0.473912	0.41684	0.754628	0.778618	0.260922	1.63796	1.20922	0.66878
ENSMUSG00000045027	Prss22	4.41756	2.83293	3.22939	3.48695	2.35308	2.07272	4.78557	10.0319	4.09811
ENSMUSG00000045103	Dmd	8.86789	11.721	9.90611	11.5062	11.0087	11.8253	6.26128	2.38779	7.35411
ENSMUSG00000045349	Sh2d5	0.330547	0.161319	0.125065	0.258222	0.121883	0.158603	1.6378	7.00924	0.933188
ENSMUSG00000045404	Kcnk13	0.390159	0.49556	0.557823	1.42191	1.08727	2.78409	1.53263	4.7927	1.60372
ENSMUSG00000045475	Lce3c	2.78677	1.74838	0.54182	3.27996	3.16822	0.834192	12.3289	22.4855	17.0916
ENSMUSG00000045502	Hcar2	16.2475	10.3213	9.61966	20.1574	19.9099	12.2645	48.951	27.4635	17.6615
ENSMUSG00000045761	Fam179a	1.16628	1.33385	1.09284	1.45046	1.58038	2.3832	0.828108	0.382673	1.28599
ENSMUSG00000045776	Lrtm1	0.410259	0.452604	0.360121	0.463367	0.600886	0.538663	0.243152	0.0551446	0.27645
ENSMUSG00000045875	Adra1a	1.54371	1.38052	1.26486	0.676719	0.618402	1.92015	0.758441	0.479787	0.814453
ENSMUSG00000046095	Krt32	2.02076	1.41429	1.79972	1.61129	0.654803	1.67372	0.596842	0.29641	0.486312
ENSMUSG00000046157	Tmem229b	11.0927	5.46882	5.02545	6.24876	8.48967	6.49656	11.6818	14.8437	16.0795
ENSMUSG00000046167	Gldn	3.67819	4.38804	3.05174	3.72454	4.16041	2.56641	1.42142	1.4343	2.83176
ENSMUSG00000046203	Sprr2g	0.299628	0	0.0597751	2.06591	0.757308	0.25657	4.76997	20.8755	3.45253
ENSMUSG00000046223	Plaur	5.46767	4.32702	2.51888	10.6846	8.43172	3.97211	15.1178	17.4632	4.59433
ENSMUSG00000046240	Hepacam	0.409087	0.379876	0.456066	0.0355539	0.152053	0.0257572	0.0746277	0.0134772	0.0851302
ENSMUSG00000046259	Sprr2h	2.44866	0.405674	0.26549	2.4119	1.91465	0.68373	6.38325	13.8928	7.26364
ENSMUSG00000046345	Smco1	2.26339	3.35238	5.25046	2.92933	3.94001	4.59177	1.6868	0.147399	2.97939
ENSMUSG00000046352	Gjb2	6.55617	6.71107	1.87922	31.012	11.6332	2.79087	66.7768	99.6378	22.1653
ENSMUSG00000046354	Defb14	9.54148	2.8656	5.36043	15.9878	9.59523	3.75646	15.192	27.886	20.3969
ENSMUSG00000046480	Scn4b	7.1289	10.7814	14.3688	10.9526	13.8075	14.1248	6.92087	0.633609	9.31249
ENSMUSG00000046490	Rnf222	3.61225	2.6456	3.35205	2.58765	3.51152	3.19859	4.37913	4.57337	5.7533
ENSMUSG00000046532	Ar	8.30062	9.51227	12.0454	7.20629	9.74008	8.62976	7.30858	3.05476	6.64456
ENSMUSG00000046546	Fam43a	12.1565	11.2629	8.36973	11.1374	12.5734	11.6318	18.2259	19.4737	14.0766
ENSMUSG00000046603	Tcaim	5.52187	5.28969	5.83872	6.15494	5.50424	5.85582	4.09988	2.41406	4.21498
ENSMUSG00000046668	Cxxc5	5.15893	7.84685	7.09995	6.49545	7.87874	6.72237	5.37938	2.89768	4.54943
ENSMUSG00000046688	Tifa	3.80581	4.06214	4.66822	5.23974	4.26966	5.43148	6.70032	8.64533	5.06438
ENSMUSG00000046694	Fam46b	15.9447	10.698	7.44795	11.2394	9.92921	8.55138	19.7584	23.5615	18.297
ENSMUSG00000046718	Bst2	17.1782	23.8566	21.7408	35.3823	27.4642	57.5483	65.6515	155.336	42.1223
ENSMUSG00000046743	Fat4	3.05318	4.07736	4.2861	3.26524	3.88845	2.14198	2.49645	1.08411	2.30626
ENSMUSG00000046818	Ddit4l	4.12361	11.5778	15.4066	10.7005	20.676	14.648	2.87922	0.661776	10.7734
ENSMUSG00000046879	Irgm1	7.67475	7.58052	8.22349	14.6983	9.7631	16.3049	15.0781	31.6901	10.1644
ENSMUSG00000046971	Pla2g4f	23.3077	13.3007	10.1769	12.9937	17.8145	10.8857	20.0859	21.7764	29.6343
ENSMUSG00000047045	Tmem164	72.011	70.56	36.7405	50.211	38.5118	65.5389	34.2652	36.5215	36.2713
ENSMUSG00000047085	Lrrc4b	0.542934	0.575115	0.483021	0.115628	0.21397	0.172771	0.106183	0	0.0741591
ENSMUSG00000047139	Cd24a	63.7196	56.6041	32.7918	97.4792	75.7307	49.2033	98.948	112.121	97.4825
ENSMUSG00000047216	Cdh19	2.5939	2.71136	2.46039	3.00951	2.50609	2.78493	1.39006	1.12297	1.8417
ENSMUSG00000047261	Gap43	2.19885	2.97701	2.41828	1.13845	1.17838	0.60348	2.15648	1.23149	1.02578
ENSMUSG00000047281	Sfn	74.6341	45.9212	30.4534	43.9749	56.9389	32.9519	97.3146	125.988	94.3841
ENSMUSG00000047361	Gm973	2.5359	3.56398	1.41654	2.50691	1.23707	2.27018	0.734011	0.423494	0.727015
ENSMUSG00000047414	Flrt2	10.9717	16.0465	15.4977	16.1614	15.0474	14.9226	11.8898	8.41056	9.79045
ENSMUSG00000047419	Cmya5	34.2572	46.6629	45.1728	38.9601	53.675	50.5017	26.9378	5.32388	36.5721
ENSMUSG00000047420	Fam180a	16.0328	8.94084	9.22089	7.45905	6.47898	6.22829	6.91106	4.43764	10.3656
ENSMUSG00000047562	Mmp10	0.442196	0.278715	0	1.10035	0.837103	0.323844	1.13076	1.40773	0.823338
ENSMUSG00000047586	Nccrp1	8.86367	6.31938	5.89427	4.84174	9.83652	4.5058	12.8387	8.72758	12.5004
ENSMUSG00000047592	Nxpe5	4.2766	6.97782	4.87845	7.08298	6.41511	6.58543	11.5197	11.7068	8.47597
ENSMUSG00000047730	Fcgbp	75.8092	71.9899	43.5309	37.0719	62.7493	45.9763	22.2408	24.6081	41.3186
ENSMUSG00000047735	Samd9l	9.85547	12.2998	11.3967	20.7764	16.7661	24.2256	23.5132	43.4756	15.5194
ENSMUSG00000047746	Fbxo40	8.34802	12.2286	11.3894	12.1034	12.7907	13.4708	6.08613	1.85683	11.0827
ENSMUSG00000047787	Flrt1	0.476624	0.824918	0.548569	0.439374	0.421751	0.667136	0.151602	0.109513	0.166761
ENSMUSG00000047810	Ccdc88b	1.28349	1.30066	1.06286	2.10703	1.63221	2.16871	2.77876	8.04727	1.38705
ENSMUSG00000047884	Klk9	8.27746	5.20017	2.73417	7.72547	10.2891	4.29924	16.8891	21.097	15.2244
ENSMUSG00000047898	Ccr4	1.93854	1.43556	1.77662	1.41511	1.32009	1.56938	0.630685	0.518048	1.46209
ENSMUSG00000047992	Fam69c	1.29793	2.07383	2.71042	1.09449	1.70652	0.269856	1.33207	0.700768	0.972125
ENSMUSG00000048027	Rgmb	13.3127	15.1605	13.818	12.211	13.2104	13.7418	9.98947	5.26082	10.34
ENSMUSG00000048120	Entpd1	11.4855	11.4174	9.80221	13.8942	12.9343	13.7129	19.801	18.0834	15.7609
ENSMUSG00000048279	Sacs	2.57271	3.51286	2.90251	3.45284	3.9498	3.23395	1.88131	1.86532	3.11792
ENSMUSG00000048373	Fgfbp1	39.0601	25.1592	16.8902	18.147	24.9496	20.3533	32.2192	55.1106	37.4472
ENSMUSG00000048388	Fam171b	2.49566	3.5787	3.77675	3.47658	2.53003	2.36598	2.32925	0.88655	1.75135
ENSMUSG00000048399	Tprg	15.0263	8.73889	9.65563	11.5442	13.9702	10.0104	18.4275	17.9488	20.05
ENSMUSG00000048402	Gli2	0.69361	1.39864	0.794143	1.08123	1.11401	0.955458	0.617256	0.398596	0.51209
ENSMUSG00000048455	Sprr1b	5.53708	1.51529	0.392356	4.01346	5.16696	0.798863	21.8426	24.5489	14.9652
ENSMUSG00000048534	Amica1	4.0568	2.25266	2.48647	3.5305	3.57939	3.43544	3.77263	10.3291	6.29067
ENSMUSG00000048766	Skint10	27.5067	16.2505	30.5395	24.0307	24.1838	29.7449	9.11786	6.11149	21.4879
ENSMUSG00000048779	P2ry6	3.77995	4.99225	4.75943	5.81877	5.50177	5.23982	7.96447	13.4424	5.82491
ENSMUSG00000049001	Ndnf	1.39573	1.40975	0.719932	0.967045	0.846069	1.64163	0.608948	0.618219	0.57932
ENSMUSG00000049037	Clec4a1	7.60525	7.72038	8.25249	12.2742	11.5143	13.0631	19.7875	36.2336	12.985
ENSMUSG00000049103	Ccr2	17.3148	18.376	15.4669	27.9697	20.4374	36.7181	46.3788	129.749	18.2707
ENSMUSG00000049112	Oxtr	2.45941	2.2701	2.8875	1.27143	1.9082	29.5131	1.37384	0.633097	1.53631
ENSMUSG00000049115	Agtr1a	5.38835	5.96538	5.64718	3.44267	4.08783	3.9749	4.70453	3.18092	5.74074
ENSMUSG00000049122	Frmd3	0.270998	0.368794	0.308934	0.381328	0.291667	0.486899	0.190097	0.0325232	0.176088
ENSMUSG00000049128	Ivl	75.9767	41.9519	35.2941	46.1569	86.8977	44.8067	110.641	87.883	133.447
ENSMUSG00000049130	C5ar1	3.51738	4.35634	4.68342	5.70541	6.41508	8.376	10.608	22.6995	7.25725
ENSMUSG00000049133	Flg2	509.264	418.907	558.512	290.124	503.474	572.434	220.601	121.896	429.913
ENSMUSG00000049134	Nrap	83.459	72.561	69.995	78.9016	64.5784	57.911	64.7985	27.257	48.2724
ENSMUSG00000049173	Myoz3	2.00012	3.68661	4.80679	3.40872	5.12764	4.41117	1.97144	0.291769	3.53553
ENSMUSG00000049214	Skint7	3.43745	4.37333	7.2364	5.8268	4.33241	5.7543	1.11562	0.201472	0.949414
ENSMUSG00000049313	Sorl1	4.37476	6.45071	3.95757	7.11678	6.19936	10.4808	6.50743	13.0101	3.3532
ENSMUSG00000049404	Rarres1	147.715	157.658	95.1653	134.929	80.8077	49.4675	73.822	46.2488	75.648
ENSMUSG00000049493	Pls1	0.574848	0.512048	0.30234	0.277961	0.32513	0.32443	0.108045	0.105365	0.158464
ENSMUSG00000049721	Gal3st1	4.60734	4.26289	5.33785	3.5354	3.66682	4.17714	2.55006	1.27192	3.54876
ENSMUSG00000049929	Lpar4	1.08624	1.66591	1.21542	2.68878	2.34145	3.18472	2.48013	1.40716	2.0622
ENSMUSG00000049971	Glt1d1	1.24692	0.717767	0.528966	0.508219	0.668769	0.582954	1.52605	1.65356	1.23136
ENSMUSG00000050063	Klk6	66.4449	42.5298	16.3472	83.5892	47.9626	24.4841	135.531	172.256	96.8366
ENSMUSG00000050071	Bex1	0.693366	2.21428	1.52157	3.32372	1.70754	1.58327	1.14682	0.724875	1.02788
ENSMUSG00000050195	Scd4	0.702287	0.843673	0.495197	0.500917	0.459058	0.596179	0.300407	0.149191	0.440594
ENSMUSG00000050211	Pla2g4e	12.6691	7.51654	4.07526	11.676	7.01712	5.25602	14.7615	28.5467	11.8425
ENSMUSG00000050295	Foxc1	11.6473	12.4864	7.35127	8.63723	6.37594	9.405	6.65119	5.92925	6.3412
ENSMUSG00000050315	Synpo2	8.65769	8.87703	8.71589	6.91465	7.33638	6.7234	8.15073	2.87337	5.49244
ENSMUSG00000050335	Lgals3	134.141	80.7335	80.0614	93.1361	98.8594	72.281	135.96	158.016	128.682
ENSMUSG00000050359	Sprr1a	33.2368	27.728	19.7894	31.0849	17.7073	17.9326	54.811	57.6021	36.8774
ENSMUSG00000050447	Lypd6	0.607041	0.548659	0.411294	0.530237	0.356294	0.478122	0.248642	0.269417	0.196807
ENSMUSG00000050578	Mmp13	3.93569	2.06908	0.253759	6.50031	9.09206	2.35459	9.06516	3.62062	5.71751
ENSMUSG00000050708	Ftl1	714.095	790.94	977.578	1211.88	1055.26	987.298	1460.56	1943.16	1137.39
ENSMUSG00000050730	Arhgap42	3.1752	4.6378	4.16601	3.89751	4.41865	3.48324	2.71485	1.49052	2.79211
ENSMUSG00000050737	Ptges	14.9839	13.5293	9.50708	17.133	16.036	17.8137	26.4695	42.2826	19.6007
ENSMUSG00000050762	Prss27	10.4003	7.25209	3.44762	8.69673	6.29222	4.9439	13.1549	30.9366	13.6882
ENSMUSG00000050777	Tmem37	3.87784	4.12207	4.72091	6.16553	4.98669	7.87655	8.99588	13.3387	9.01195
ENSMUSG00000050854	Tmem125	6.04008	3.75761	3.56094	3.49964	5.34533	4.02031	7.55563	12.7352	9.55951
ENSMUSG00000051043	Gprc5c	5.4446	7.62225	6.84384	6.7944	6.67691	6.37258	5.33851	2.56174	4.88427
ENSMUSG00000051225	Fam83a	0.821207	0.787973	0.430397	0.726618	0.933611	0.819399	1.28057	4.3342	1.68823
ENSMUSG00000051262	Cml3	1.59576	1.6779	2.28559	1.50463	1.24631	0.394164	1.90339	1.11524	1.14422
ENSMUSG00000051359	Ncald	2.16164	2.91992	2.17617	2.58262	1.43982	1.74602	0.941419	0.661371	1.37568
ENSMUSG00000051439	Cd14	10.3292	8.8977	7.60997	29.0945	23.2357	11.1531	57.1729	35.6842	17.5655
ENSMUSG00000051682	Treml4	0.252485	0.124945	0	0.92695	0.937149	0.171978	1.73212	1.38835	0.719207
ENSMUSG00000051747	Ttn	89.7397	133.112	105.482	94.9233	130.428	134.875	72.6491	15.8127	67.9285
ENSMUSG00000051910	Sox6	4.07961	4.77492	5.32538	4.21529	4.55306	5.85107	2.48023	1.30085	3.99882
ENSMUSG00000052013	Btla	0.714168	0.790919	0.638679	1.94054	0.778041	1.64746	1.18377	2.02746	0.622288
ENSMUSG00000052026	Slc6a7	0.686469	0.479647	0.551883	0.292667	0.348602	0.087734	0.900279	0.378725	0.548872
ENSMUSG00000052062	Pard3b	4.70805	5.89423	6.92775	4.56688	5.06364	3.65058	4.2456	1.96623	3.43284
ENSMUSG00000052102	Gnpda1	8.30686	8.1869	8.33832	12.0923	9.84325	10.4825	18.2229	30.9698	10.3407
ENSMUSG00000052160	Pld4	18.295	21.0634	24.7694	29.7414	26.2246	44.1468	39.2053	76.0762	31.5221
ENSMUSG00000052336	Cx3cr1	0.84982	0.828535	0.822381	2.04892	1.33166	1.54771	1.35052	1.84697	0.730763
ENSMUSG00000052353	Cemip	0.630488	0.404492	0.112304	0.66538	0.788021	0.090382	1.43155	1.82861	1.19489
ENSMUSG00000052397	Ezr	32.3865	22.599	22.3318	20.8387	20.9977	24.9909	25.4559	39.5534	27.7553
ENSMUSG00000052477	C130026I21Rik	0.801429	0.693537	0.491948	1.35614	2.03759	1.01179	3.59004	4.25829	1.08007
ENSMUSG00000052504	Epha3	1.19546	2.21024	2.28614	3.435	2.88124	3.10431	2.10598	1.59261	2.74555
ENSMUSG00000052516	Robo2	2.60155	3.63054	2.65229	3.47611	1.91929	2.42531	2.67107	1.3556	1.57595
ENSMUSG00000052557	Gan	9.68996	8.522	8.84033	6.54162	8.57455	9.80143	5.71153	3.67242	7.44987
ENSMUSG00000052681	Rap1b	59.3522	63.8221	70.7779	76.756	79.0696	77.1795	94.5503	123.276	71.2405
ENSMUSG00000052727	Map1b	4.28572	6.25042	5.16683	5.43316	5.36542	3.79216	4.21837	2.54521	2.93886
ENSMUSG00000052749	Trim30b	0.184229	0.186243	0.131262	0.699929	0.588443	1.0423	2.1085	6.9867	0.571937
ENSMUSG00000052776	Oas1a	2.88813	5.61813	4.04593	8.8899	8.07182	17.7753	19.055	49.4772	10.346
ENSMUSG00000052852	Reep1	2.70202	4.39683	4.11479	5.13348	3.63621	4.60069	2.24649	1.55099	3.30454
ENSMUSG00000052920	Prkg1	5.21691	3.78838	5.99778	4.55055	3.96826	4.20239	3.66942	0.981957	2.66371
ENSMUSG00000052942	Glis3	0.559381	0.811996	0.728024	1.2384	1.34651	0.59304	1.53651	1.62312	0.888488
ENSMUSG00000052957	Gas1	55.0785	36.4643	38.7064	32.447	39.0094	21.5417	48.1131	36.665	48.2956
ENSMUSG00000053007	Creb5	3.63485	4.04676	4.60976	2.44662	3.15673	4.01004	3.44792	1.94693	2.51658
ENSMUSG00000053025	Sv2b	0.152262	0.481514	0.397779	0.685603	0.486337	0.954572	0.337285	0.268009	0.578959
ENSMUSG00000053040	Aph1c	1.03056	1.09685	1.26578	1.67414	1.45787	1.11131	2.06707	2.94617	1.27486
ENSMUSG00000053054	Adh6a	9.10459	8.93718	11.8211	5.26312	7.25466	6.48618	4.56704	4.14616	5.88362
ENSMUSG00000053063	Clec12a	4.53989	4.62876	3.7378	14.7816	8.10854	5.8235	19.2193	38.5225	5.13504
ENSMUSG00000053198	Prx	4.40606	5.63913	5.37982	3.63594	5.85895	6.06468	3.10758	1.84042	3.26192
ENSMUSG00000053317	Sec61b	85.9005	89.6616	79.9591	93.0669	65.3095	87.1367	123.627	129.149	118.457
ENSMUSG00000053398	Phgdh	56.4064	43.5601	42.5089	40.9386	36.7542	31.7151	39.3813	44.5169	62.3373
ENSMUSG00000053522	Lgals7	300.714	191.6	137.628	207.529	238.348	144.609	384.619	379.494	394.614
ENSMUSG00000053687	Dpep2	4.16297	4.55782	4.85632	6.37078	4.75565	6.89783	9.5794	16.7025	5.753
ENSMUSG00000053716	Dusp7	12.9724	12.6759	9.39336	11.0109	11.334	11.6053	15.6286	24.9263	13.2254
ENSMUSG00000053835	H2-T24	2.13621	2.32569	1.9169	3.43929	3.06075	4.922	6.21691	28.7809	4.53519
ENSMUSG00000054005	Mill1	5.25904	4.8866	4.221	5.5659	4.43198	7.23054	3.0601	2.64688	2.79087
ENSMUSG00000054046	Klk13	3.09926	1.43933	0.389137	6.93802	3.0339	0.510361	9.16343	7.98697	4.4251
ENSMUSG00000054072	Iigp1	6.16889	5.83501	5.37448	9.8381	7.75658	14.5281	7.05217	13.621	9.46414
ENSMUSG00000054146	Krt15	591.648	491.773	425.581	425.952	217.689	484.349	185.144	120.906	195.237
ENSMUSG00000054404	Slfn5	13.5546	17.4284	16.1952	24.8303	22.4253	33.5325	31.0692	59.2568	20.5632
ENSMUSG00000054499	Dedd2	9.67377	6.79154	6.38904	7.34333	8.5792	8.16596	9.89954	12.7599	11.7602
ENSMUSG00000054580	Pla2r1	11.032	7.75168	7.37735	7.94463	5.5099	4.41605	6.52252	4.16107	4.84146
ENSMUSG00000054659	Pm20d2	3.64305	2.90801	3.41845	3.14867	3.03753	3.93022	1.65971	0.967741	2.20499
ENSMUSG00000054672	5830411N06Rik	0.85047	0.786385	0.732123	4.34916	2.06122	0.660913	0.409475	0.691633	0.200186
ENSMUSG00000054676	1600014C10Rik	6.47076	6.48353	9.77815	7.78795	7.88301	13.5073	10.3809	19.4449	12.9878
ENSMUSG00000054905	Stfa3	460.305	153.058	21.8434	682.118	763.719	137.636	1433.03	1526.48	1487.68
ENSMUSG00000055022	Cntn1	1.35521	0.801368	0.713644	0.528525	0.461431	0.714241	0.888921	0.423806	0.757908
ENSMUSG00000055027	Smyd1	16.5698	17.9531	23.6051	21.1994	22.6631	23.6193	13.122	3.5419	18.9247
ENSMUSG00000055030	Sprr2e	0.105205	0	0	1.70981	0.562489	0	3.53452	14.4356	1.8609
ENSMUSG00000055368	Slc6a2	1.91424	2.02751	2.16186	1.45088	1.59592	1.05572	0.811656	0.559666	0.990377
ENSMUSG00000055489	Ano5	2.66355	5.24539	6.58059	5.2775	6.41319	9.18585	2.29629	0.518366	4.81792
ENSMUSG00000055493	Epm2a	6.49108	6.93424	11.346	9.14059	8.64229	9.35936	4.40626	1.51418	7.47184
ENSMUSG00000055541	Lair1	0.861831	1.11092	0.914684	2.49235	1.73592	1.21767	3.20728	13.6926	1.43558
ENSMUSG00000055653	Gpc3	14.0799	31.3638	27.267	36.0615	36.8345	48.4399	13.5399	7.36509	24.0321
ENSMUSG00000055775	Myh8	779.085	1223.53	1300.79	1112.46	1387.53	1465.33	619.629	113.264	1018.45
ENSMUSG00000055866	Per2	1.14608	1.28509	2.01257	2.15634	0.860604	2.85011	2.9867	2.29075	2.11566
ENSMUSG00000055960	Skint4	10.9957	7.71529	8.79705	8.40381	8.19242	9.93367	2.80794	1.47252	7.15418
ENSMUSG00000055963	Triqk	2.29372	2.17145	2.93455	3.37909	2.20067	1.63319	1.76287	0.871305	1.62288
ENSMUSG00000055980	Irs1	6.44846	8.75527	7.43224	6.61036	6.83463	8.14864	5.72022	2.70189	5.09747
ENSMUSG00000056054	S100a8	12.9524	9.47181	0.975085	356.164	51.8853	8.10904	366.164	1120.75	60.2718
ENSMUSG00000056071	S100a9	33.0065	15.6668	1.31011	425.004	95.2588	16.1364	534.235	1312.16	101.066
ENSMUSG00000056144	Trim34a	3.64755	4.07204	4.07006	5.75455	5.43894	7.24596	7.62115	12.1013	6.03012
ENSMUSG00000056174	Col8a2	3.06788	2.62572	1.78817	2.53032	1.24863	2.14631	1.46152	0.941902	1.26091
ENSMUSG00000056201	Cfl1	95.3675	90.2692	74.6189	112.558	81.3271	123.56	131.472	228.388	120.005
ENSMUSG00000056209	Npm3	25.7338	22.9878	16.7617	31.6301	23.5194	25.7083	27.7844	44.6416	31.2129
ENSMUSG00000056293	Gsdmc2	0.462886	0.0806308	0.0184689	0.729497	0.269986	0.0792731	0.689046	2.05321	0.767303
ENSMUSG00000056296	Synpr	0.549867	0.769679	0.642512	0.588035	0.152724	0.554927	0.389775	0.228769	0.222314
ENSMUSG00000056515	Rab31	27.7126	22.6254	23.6966	33.5057	26.0306	19.7017	43.8078	62.0513	34.0895
ENSMUSG00000056569	Mpz	12.8846	18.7935	19.4691	11.2036	20.2375	19.05	9.76229	4.77508	10.724
ENSMUSG00000056602	Fry	6.70002	6.98758	9.0358	5.17281	7.41553	9.17407	4.81653	3.53596	6.47642
ENSMUSG00000056656	Apol8	0.743556	0.338521	0.0809113	0.825605	0.367981	0.332821	1.132	0.802584	0.724229
ENSMUSG00000056671	Prelid2	1.27168	1.38448	1.26849	2.39626	2.20369	2.07134	4.40102	3.96364	2.23542
ENSMUSG00000056724	Nbeal2	5.62507	4.43582	3.81471	3.97294	5.96773	4.51202	7.32853	11.2619	6.39345
ENSMUSG00000056737	Capg	60.5424	46.4662	46.1684	56.4096	46.9647	51.1442	72.5847	125.908	71.0113
ENSMUSG00000056888	Glipr1	2.01238	1.5604	2.58496	4.53473	2.26588	2.8823	3.62178	6.58391	2.91203
ENSMUSG00000056900	Usp13	10.9582	11.2172	12.0053	11.1057	13.3786	9.0499	6.90048	1.66223	8.77015
ENSMUSG00000056966	Gjc3	0.592199	0.681921	0.670229	0.560872	0.985305	0.499781	0.294318	0.14032	0.356841
ENSMUSG00000057191	AB124611	2.8574	3.54695	2.31747	6.39181	4.77663	5.60242	14.0789	25.8742	7.15291
ENSMUSG00000057337	Chst3	1.30704	1.00765	0.729852	0.887021	0.589698	0.582362	0.336169	0.406287	0.758529
ENSMUSG00000057346	Apol9a	0.41944	0.656426	0.130746	0.748821	0.891938	1.15045	1.35498	1.87929	0.688926
ENSMUSG00000057454	Lypd3	56.6158	30.6144	28.6112	39.7991	43.1935	27.3959	75.5831	89.5436	65.8141
ENSMUSG00000057596	Trim30d	2.26896	3.1845	3.04495	4.42491	3.80016	4.83773	7.32858	16.5249	3.52757
ENSMUSG00000057606	Colq	0.600385	0.972857	1.33703	1.36153	1.208	0.269009	0.259804	0.172035	0.183465
ENSMUSG00000057722	Lepr	7.02806	11.9451	8.3145	13.9305	8.76302	17.9831	4.10675	3.83499	6.38822
ENSMUSG00000057751	Megf6	3.33948	7.02111	1.95972	6.56586	4.17387	3.36092	2.64516	2.45325	2.61266
ENSMUSG00000057766	Ankrd29	4.23517	4.11344	5.30837	3.59996	4.20108	2.48466	3.13996	1.23092	2.63335
ENSMUSG00000057880	Abat	2.52132	3.61921	3.50548	3.30846	4.73414	1.9686	2.14225	1.25734	2.05099
ENSMUSG00000057897	Camk2b	5.96517	5.97395	5.87955	6.573	6.31503	4.2345	4.7026	2.65681	3.0773
ENSMUSG00000057969	Sema3b	18.9587	37.0885	38.3607	23.4032	25.4824	10.228	18.5669	5.03613	14.7844
ENSMUSG00000058163	Gm5431	2.38052	2.10289	2.8432	2.73558	2.80132	4.69374	4.80297	8.56075	3.66198
ENSMUSG00000058260	Serpina9	0.280246	0.317307	0.0894534	1.19249	0.501272	0.167981	0.996576	1.89601	0.407898
ENSMUSG00000058427	Cxcl2	4.43378	2.01636	0.0139957	18.6436	13.3805	1.57692	37.987	13.3903	5.4317
ENSMUSG00000058624	Gda	26.8	26.6721	30.3446	24.1966	29.8522	57.3163	39.9783	81.1854	41.4675
ENSMUSG00000058672	Tubb2a	63.1405	59.0768	41.7956	60.0485	49.8245	50.1824	70.3513	90.8583	69.1312
ENSMUSG00000058690	Ccser2	18.6851	17.3593	19.5528	18.2365	16.8166	19.3437	13.8268	10.5274	14.1391
ENSMUSG00000058715	Fcer1g	12.5109	14.4116	12.0718	22.6333	16.9738	26.4908	36.2876	80.496	21.206
ENSMUSG00000058755	Osm	0.951425	0.479544	0.123023	2.95026	2.24372	0.773209	6.01045	2.84189	1.72744
ENSMUSG00000058818	Pirb	8.89796	9.42507	9.41858	13.6518	11.9775	17.9277	21.3398	46.4334	13.5223
ENSMUSG00000058914	C1qtnf3	42.9194	58.6757	58.0888	86.4139	54.0602	5.55	33.6343	12.1812	28.2833
ENSMUSG00000058966	Fam57b	5.2258	4.18333	3.2707	4.30627	2.39062	3.74729	2.75403	0.956457	1.7089
ENSMUSG00000059013	Sh2d3c	1.23686	0.995896	1.2466	2.15738	1.95384	1.43421	4.66153	2.9296	1.43248
ENSMUSG00000059022	Kcp	0.122918	0.678025	0.384176	0.573077	0.382369	0.692922	0.304958	0.165219	0.173938
ENSMUSG00000059049	Frem1	1.83696	4.93545	2.57585	3.362	2.18961	1.36459	1.62526	0.839471	1.10745
ENSMUSG00000059089	Fcgr4	3.82456	2.87995	1.93926	8.57022	4.18263	5.6288	18.4831	74.0767	7.98915
ENSMUSG00000059146	Ntrk3	1.36843	1.9784	1.63653	1.44934	1.8023	0.913484	0.821385	0.304913	0.721326
ENSMUSG00000059325	Hopx	17.869	13.769	11.715	13.5819	12.1741	14.5413	17.3008	20.3028	18.3117
ENSMUSG00000059430	Actg2	15.916	12.1294	16.4751	5.94545	5.92614	13.4359	10.7721	6.96295	9.01498
ENSMUSG00000059493	Nhs	0.31799	0.781411	0.48938	0.890426	0.552003	0.51541	0.295847	0.183181	0.404061
ENSMUSG00000059498	Fcgr3	61.9029	67.2642	74.079	104.062	83.6348	100.835	142.453	162.678	123.246
ENSMUSG00000059657	Stfa2l1	1.93383	0.631608	0	7.33347	4.13579	0.931459	16.0926	9.85585	2.54104
ENSMUSG00000059668	Krt4	0.488175	0.470151	0.561863	0.536327	0.675337	0.542623	0.0970475	0.147219	0.398539
ENSMUSG00000059883	Irak4	6.32058	6.08071	5.47253	6.78279	6.29552	7.38587	9.25264	12.259	6.64587
ENSMUSG00000059900	Tmem40	38.7025	22.492	17.9586	28.3122	33.0105	19.7724	40.5736	39.4143	54.3759
ENSMUSG00000059956	Serpinb12	11.8533	8.57668	4.57544	28.4568	23.272	5.95402	35.5856	19.3284	25.1098
ENSMUSG00000059991	Nptx2	3.76608	4.47597	2.78616	1.85477	1.06781	2.28428	0.616417	1.17765	1.58609
ENSMUSG00000060063	Alox5ap	24.7858	23.4531	28.7678	34.3176	29.4285	58.5278	58.9003	105.996	46.2804
ENSMUSG00000060131	Atp8b4	1.38443	1.23457	1.25605	2.28874	1.826	2.84456	3.01332	9.20307	1.96188
ENSMUSG00000060201	Spink7	10.6942	1.90866	0.233166	3.85659	21.4169	0.375303	38.9042	60.745	26.2259
ENSMUSG00000060206	Zfp462	1.28954	1.72705	1.37818	1.00808	1.36965	1.09181	0.620681	0.596117	0.872395
ENSMUSG00000060429	Sntb1	8.13468	8.20862	9.84613	7.03869	6.46222	10.7118	6.23209	4.11471	6.33729
ENSMUSG00000060477	Irak2	7.39157	4.96266	6.53145	5.99067	6.62236	5.70127	8.64329	11.0157	8.17115
ENSMUSG00000060548	Tnfrsf19	26.0617	21.0685	17.8553	18.6905	18.5988	18.9498	9.63746	7.44528	15.4833
ENSMUSG00000060560	Ces4a	77.9319	57.3645	41.6061	61.7689	36.2067	48.9632	36.4835	36.9502	44.1012
ENSMUSG00000060586	H2-Eb1	55.5536	66.397	85.8	67.9546	71.5996	85.9692	44.5036	42.2227	62.1868
ENSMUSG00000060591	Ifitm2	19.8602	17.5458	20.8738	19.9772	18.6315	25.5039	28.1427	36.6597	26.3267
ENSMUSG00000060621	Nkpd1	7.98794	6.14303	4.78072	5.37926	8.49213	5.80916	11.1739	15.585	15.3118
ENSMUSG00000060678	Hist1h4c	239.33	315.229	179.633	288.22	247.99	160.157	345.347	417.782	391.458
ENSMUSG00000060791	Gmfg	11.908	11.3856	15.6037	20.2557	17.5989	21.8233	25.3465	29.1378	21.2299
ENSMUSG00000060981	Hist1h4h	88.4215	92.177	53.9902	38.6807	75.5666	59.2661	102.167	111.091	94.4017
ENSMUSG00000061068	Mcpt4	28.0528	31.3417	32.5936	42.327	41.4674	48.5544	44.8566	27.068	41.2046
ENSMUSG00000061080	Lsamp	1.06517	1.39752	1.74812	0.941569	1.11512	1.20833	0.771719	0.321223	0.685549
ENSMUSG00000061143	Maml3	3.14428	2.89733	2.06683	2.09325	2.31474	1.56644	1.9672	2.23436	2.06993
ENSMUSG00000061353	Cxcl12	11.7362	10.0883	15.3775	16.7824	14.529	13.4432	26.4983	26.2149	17.2117
ENSMUSG00000061462	Obscn	11.136	17.407	12.25	9.84447	17.5947	12.7781	9.06189	2.2355	8.06902
ENSMUSG00000061577	Gpr114	0.326489	0.386356	0.28319	0.615209	0.620968	0.395044	0.616314	1.11302	0.545222
ENSMUSG00000061603	Akap6	2.70902	3.52923	3.05138	3.93131	3.59513	2.69194	2.31665	0.809747	2.23438
ENSMUSG00000061666	Gdpd1	7.88269	4.06706	4.58098	8.20319	7.62954	4.51215	9.12297	8.44564	9.90745
ENSMUSG00000061723	Tnnt3	303.146	444.183	555.871	411.616	509.268	551.597	256.534	60.4809	381.345
ENSMUSG00000061751	Kalrn	3.10447	3.55825	2.52684	2.94717	2.21221	2.73652	2.02815	1.40039	1.97833
ENSMUSG00000061816	Myl1	48.4334	99.4256	131.303	106.839	111.926	106.766	45.7523	11.1123	71.1252
ENSMUSG00000062184	Hs6st2	0.736021	1.11181	1.04619	1.604	1.24317	2.61947	0.703792	0.649239	1.2926
ENSMUSG00000062345	Serpinb2	51.1635	35.3769	44.1659	35.3407	45.598	41.2066	69.0968	101.969	49.896
ENSMUSG00000062464	Cyp4f37	0.7771	0.79315	0.978623	0.870679	0.585457	0.98774	0.411702	0.228491	0.540006
ENSMUSG00000062488	I830012O16Rik	1.84093	2.17478	1.99258	6.79017	3.76956	5.19867	6.29624	19.6334	2.65254
ENSMUSG00000062593	Lilrb4	18.3166	16.6314	11.8494	35.3798	25.557	24.5618	49.2211	114.145	19.3776
ENSMUSG00000062694	Cav3	9.80053	13.9008	14.595	16.7914	13.7205	18.5794	9.73882	4.59983	13.7429
ENSMUSG00000062929	Cfl2	47.7096	48.3245	57.4907	58.1918	52.6001	55.2495	43.4501	22.1296	44.755
ENSMUSG00000062939	Stat4	0.429568	0.409211	0.307976	0.793346	0.587233	0.445426	0.874248	1.39839	0.542739
ENSMUSG00000062991	Nrg1	0.141906	0.112358	0.128681	0.292257	0.32606	0.289974	0.853493	1.92186	0.352063
ENSMUSG00000063142	Kcnma1	0.742448	1.50113	1.24312	1.61931	1.78717	1.62723	0.730953	0.297011	1.2954
ENSMUSG00000063296	Tmem117	2.07277	2.09991	2.46959	3.31768	2.05694	2.71165	1.88975	0.612683	1.32397
ENSMUSG00000063415	Cyp26b1	32.7752	16.8489	22.4496	9.52827	16.7107	15.4069	18.686	18.3926	16.7438
ENSMUSG00000063428	Ddo	1.56118	1.6125	2.28931	2.43147	2.26998	2.77078	1.47592	0.23914	1.57799
ENSMUSG00000063458	1700112E06Rik	2.68926	2.8318	2.72648	1.38958	1.37142	2.31223	0.638034	0.296291	1.91611
ENSMUSG00000063506	Arhgap22	1.92781	2.04393	1.7093	3.07789	1.58008	1.17334	2.78739	5.15144	2.55987
ENSMUSG00000063522	2010109I03Rik	10.0368	5.85115	7.87114	7.74367	10.3069	8.49843	12.7854	15.8531	12.7476
ENSMUSG00000063531	Sema3e	4.18542	4.01342	2.67314	3.987	2.13262	3.88138	2.10774	1.88394	2.79567
ENSMUSG00000063651	Cnfn	16.6101	9.94586	5.90938	9.27107	14.4246	7.58566	36.2871	33.3034	30.8356
ENSMUSG00000063727	Tnfrsf11b	2.05976	2.81467	3.32984	2.15476	1.93327	3.46669	0.998549	1.59115	1.10558
ENSMUSG00000063730	Hsd3b2	1.37961	2.34166	1.79874	0.684797	1.48898	1.68598	2.79617	2.88379	2.26187
ENSMUSG00000063821	Dupd1	1.09873	4.34613	5.11452	8.65785	2.91944	1.92087	0.265021	0.123071	2.18409
ENSMUSG00000063856	Gpx1	218.496	181.278	228.109	266.551	212.148	227.069	344.221	434.223	309.584
ENSMUSG00000064023	Klk8	39.337	18.4272	14.3515	31.7093	36.8196	17.1097	49.2144	31.0251	53.3892
ENSMUSG00000064109	Hcst	1.11279	0.720346	0.719996	1.62931	1.1987	1.44863	1.83432	2.66135	0.972771
ENSMUSG00000064115	Cadm2	0.618979	0.575505	0.572356	0.50733	0.399681	0.604502	0.186822	0.12652	0.333371
ENSMUSG00000064179	Tnnt1	0.265297	5.10263	2.11704	11.3817	3.43864	5.8055	0.639913	0.759418	1.84727
ENSMUSG00000064232	Gm5414	0.168904	0.0525388	0.0722057	0.0237669	0.117281	0.464887	2.36962	8.00015	1.87795
ENSMUSG00000064246	Chil1	6.57285	4.00418	1.96453	36.5779	7.79664	8.15289	29.239	97.6245	26.1667
ENSMUSG00000064267	Hvcn1	3.48651	3.68642	3.79261	8.52182	4.70036	5.31366	4.40508	6.49277	3.69807
ENSMUSG00000064294	Aox3	3.8186	3.52929	5.29209	2.28077	3.01708	1.18271	5.47604	0.910061	2.22549
ENSMUSG00000066279	Chrna10	0.366374	0.815084	1.23936	1.08262	0.557463	1.00596	0.312869	0.124899	0.515224
ENSMUSG00000066364	Serpina3b	54.5371	60.3375	47.1649	58.6608	15.7907	37.6827	17.8891	5.11619	9.70483
ENSMUSG00000066442	Mthfs	10.9753	7.41463	8.45514	16.9879	13.3841	9.54489	16.2587	27.7155	13.8667
ENSMUSG00000066705	Fxyd6	18.5602	18.5818	23.3141	29.03	25.7311	20.9244	14.79	7.52187	17.3836
ENSMUSG00000066756	Igfl3	0.635963	1.69246	0.176212	3.41048	1.37384	0.302539	9.93438	4.11582	4.35681
ENSMUSG00000066800	Rnasel	6.03137	5.38251	7.49135	8.89694	7.99139	7.79038	9.59213	12.245	8.93927
ENSMUSG00000066842	Hmcn1	5.42048	5.00279	3.36178	4.43045	3.23216	3.46403	3.2986	2.11017	3.24275
ENSMUSG00000066861	Oas1g	0.428206	0.766953	0.661362	1.27894	1.10109	3.62234	3.31277	7.92181	1.56372
ENSMUSG00000067455	Hist1h4j	73.119	85.2474	37.0677	43.6685	47.6865	19.9128	72.5723	93.8243	87.892
ENSMUSG00000067594	Krt77	1699.9	1329.87	1504.75	700.106	1411.45	1480.7	410.379	213.374	1276.58
ENSMUSG00000067597	Dgat2l6	25.4673	23.993	16.6732	25.4383	13.8221	19.9185	8.67667	12.873	13.9366
ENSMUSG00000067786	Nnat	4.0637	1.02235	35.553	3.15958	0.492787	1.85016	13.977	2.52258	8.76925
ENSMUSG00000068036	Mllt4	44.4316	40.3244	34.2454	33.479	30.4927	44.149	26.181	21.5968	25.7265
ENSMUSG00000068115	Ninl	1.26544	1.83976	0.980015	1.50192	0.817553	1.27877	0.731258	0.528239	0.730891
ENSMUSG00000068220	Lgals1	350.63	449.871	433.403	606.122	424.442	644.269	645.91	748.335	595.562
ENSMUSG00000068245	Phf11d	3.28831	3.36747	3.33996	7.24695	4.23296	8.69478	8.89398	22.1334	5.29668
ENSMUSG00000068246	Apol9b	0.336281	0.619568	0.258027	0.636984	0.352049	0.636823	1.06962	1.44875	0.50985
ENSMUSG00000068335	Dok1	4.60723	6.86384	6.47019	8.0013	7.09134	9.04093	10.4654	20.9821	9.19108
ENSMUSG00000068617	Efcab1	1.63717	1.50279	1.37689	1.89716	1.06101	1.52903	0.630505	0.683188	0.681383
ENSMUSG00000068697	Myoz1	28.8917	53.8985	76.9615	47.972	70.6059	60.4151	21.433	4.46706	50.6903
ENSMUSG00000068735	Trp53i11	7.20546	7.44699	4.3012	4.81453	4.35564	4.29975	6.46125	7.33152	4.65659
ENSMUSG00000068748	Ptprz1	2.18807	2.2255	2.25681	1.30975	0.921241	0.621357	2.43629	2.81214	0.892674
ENSMUSG00000068876	Cgn	11.4999	10.0003	10.7068	6.67374	9.2475	10.3616	4.90039	4.3176	7.13072
ENSMUSG00000068885	Lce3f	0.634487	0.502374	0.115071	5.0565	1.28966	0	9.12291	23.7115	10.8441
ENSMUSG00000068923	Syt11	1.79419	2.30059	1.90899	1.43736	1.21703	1.38272	1.22	1.42019	1.15258
ENSMUSG00000069248	Serpinb6e	14.1889	19.1384	15.9318	19.121	11.6937	90.5058	3.34891	5.4009	12.4125
ENSMUSG00000069273	Hist1h3e	78.0795	95.126	79.5048	146.909	90.322	77.8099	146.724	172.697	133.604
ENSMUSG00000069300	Hist1h2bj	81.2261	86.0835	34.9894	93.3218	44.5217	38.7308	90.5324	131.905	95.7051
ENSMUSG00000069306	Hist1h4m	78.0887	72.9927	30.1932	33.7965	27.3165	31.4494	0.611543	0	50.427
ENSMUSG00000069372	Ctxn3	2.56154	6.83516	6.33766	13.6296	11.7426	4.86532	2.02492	0.253167	6.49816
ENSMUSG00000069515	Lyz1	474.915	579.459	635.827	1068.31	790.579	942.693	894.337	712.179	906.185
ENSMUSG00000069609	Gm11710	1.22158	2.09721	1.03105	1.48091	1.37021	1.35783	4.95407	5.26276	1.47218
ENSMUSG00000069769	Msi2	8.16654	9.00601	8.45622	9.07315	8.44668	8.37503	5.92811	4.55632	6.05409
ENSMUSG00000069793	Slfn9	3.3746	3.86801	1.77833	5.04861	3.2124	3.95963	5.1208	9.30009	4.53073
ENSMUSG00000069808	Fam57a	17.9195	10.0851	10.5992	10.046	13.1912	10.8113	15.2832	13.796	19.1577
ENSMUSG00000069874	Irgm2	11.9847	13.1202	12.6747	17.4062	15.883	25.0972	17.0852	33.9152	14.7183
ENSMUSG00000069892	9930111J21Rik2	3.15112	3.85945	3.97937	4.52141	4.7225	5.11333	5.55436	8.39983	4.23651
ENSMUSG00000069893	9930111J21Rik1	1.41591	1.90175	1.71171	2.16778	2.37883	2.94872	2.92738	4.45629	2.10006
ENSMUSG00000069911	Fam196b	0.283216	0.478733	0.423756	0.609315	0.673804	1.06898	0.639476	1.4526	0.655394
ENSMUSG00000070003	Ssbp4	11.8453	12.9188	12.1926	14.7705	13.2095	15.3539	16.9562	26.8656	16.452
ENSMUSG00000070031	Sp140	5.29984	4.67003	5.12132	9.21703	8.17886	7.28596	13.7652	17.6238	8.67145
ENSMUSG00000070034	Sp110	3.54123	3.29168	4.04875	4.91591	5.37508	7.29265	8.28478	19.485	5.94463
ENSMUSG00000070047	Fat1	18.6208	19.8224	12.9164	14.9344	15.3355	13.192	13.0451	10.8328	11.3539
ENSMUSG00000070305	Mpzl3	26.9481	15.4459	15.7855	17.2998	23.7254	17.3798	25.3646	26.8875	29.8381
ENSMUSG00000070323	Mmp27	16.2111	14.2297	21.4827	11.8749	13.9954	10.148	13.5114	7.53867	12.7772
ENSMUSG00000070327	Rnf213	9.46638	11.5705	9.98722	14.1196	13.9444	21.562	25.3817	48.6745	12.5987
ENSMUSG00000070372	Capza1	63.7627	55.1416	46.7827	66.831	59.5836	69.2961	70.7612	115.348	71.5959
ENSMUSG00000070419	Cyp3a57	11.9854	10.8737	7.45724	12.6236	6.30622	13.0193	4.84551	4.80731	8.09623
ENSMUSG00000070424	Art5	2.29012	2.92575	3.98598	5.31709	4.29349	2.77643	1.23201	0.209404	1.77151
ENSMUSG00000070576	Mn1	3.77697	7.03088	7.14308	5.24774	7.77878	6.63215	4.08966	1.97636	4.97405
ENSMUSG00000070609	Gm13177	32.9133	26.9099	18.6817	23.5098	16.067	27.1867	8.76712	8.74969	15.5967
ENSMUSG00000070719	Pla2g4d	0.0542711	0.011817	0.0433078	0.673548	0.400958	0.011618	0.650787	1.88449	0.735059
ENSMUSG00000071342	Lsmem1	1.00682	2.39523	2.6967	2.18542	2.71872	3.51239	1.3299	0.375918	2.073
ENSMUSG00000071540	3425401B19Rik	6.3612	7.29303	5.68363	6.42011	7.30333	4.49188	4.20729	0.63486	3.53479
ENSMUSG00000071547	Nt5dc2	13.8405	13.6276	7.77227	18.3286	12.8012	8.27268	22.7096	41.5922	18.9993
ENSMUSG00000071562	Stfa1	37.0345	17.4324	3.34895	178.475	109.16	11.8313	378.517	832.785	194.161
ENSMUSG00000071604	Fam189a2	9.89298	8.27507	7.8768	7.03523	7.96393	8.42064	6.58856	3.34592	6.74104
ENSMUSG00000071715	Ncf4	3.28118	4.88202	5.56398	7.89125	6.24644	8.45821	12.9174	30.505	6.71589
ENSMUSG00000071757	Zhx2	3.73226	5.34803	5.83069	4.65835	5.0421	4.15155	3.37592	2.32596	3.50429
ENSMUSG00000071847	Apcdd1	16.768	17.5627	16.6843	11.6113	12.3283	19.6665	10.5772	5.51417	13.6721
ENSMUSG00000071856	Mcc	7.46398	7.3883	6.33733	5.71592	6.80512	7.4493	4.47676	3.66379	5.45868
ENSMUSG00000072572	Slc39a2	5.21389	3.52905	1.83054	2.60159	3.58462	2.01936	4.94658	4.82198	6.83021
ENSMUSG00000072596	Ear2	18.1578	15.8635	21.9134	15.7086	12.8883	43.0185	4.43605	4.05342	12.721
ENSMUSG00000072620	Slfn2	17.5043	13.9389	13.0432	25.3327	20.6034	29.2288	45.0465	125.423	27.3579
ENSMUSG00000072720	Myo18b	9.20002	12.5162	8.29296	8.49875	10.9721	7.98602	6.50612	2.16135	6.94418
ENSMUSG00000072812	Ahnak2	19.4116	19.0034	21.7288	14.3972	17.4823	14.0383	16.7026	8.58202	13.8881
ENSMUSG00000072845	Tmprss11a	0.362266	0.0758457	0.0555931	0.60386	0.392797	0.0596549	0.46091	0.717918	0.394331
ENSMUSG00000072889	Nfxl1	7.23609	7.17348	6.61552	9.16689	8.54389	10.631	11.1814	16.1622	8.33858
ENSMUSG00000072941	Sod3	7.62483	4.96847	9.75315	3.46801	8.76382	7.46524	13.3069	10.2112	10.0303
ENSMUSG00000072964	Bhlhb9	4.35328	5.54218	3.53611	5.4891	3.39102	4.03731	2.36003	2.70017	3.00986
ENSMUSG00000072966	Gprasp2	0.272886	0.502769	0.272201	0.47555	0.357103	0.381962	0.0542489	0.12932	0.222781
ENSMUSG00000073125	Xlr3b	0.302878	0.293104	0.335685	0.762399	0.621577	1.27875	1.94816	0.433497	0.272122
ENSMUSG00000073412	Lst1	8.08976	10.174	9.04332	20.1268	11.1183	14.9293	25.9533	89.8336	13.4636
ENSMUSG00000073468	Sft2d1	9.61031	8.04065	7.53306	12.1642	8.79795	10.1408	12.5629	17.3252	11.9165
ENSMUSG00000073491	Pydc4	0.92761	1.55234	1.06275	2.61574	2.4785	4.85661	6.22469	8.13414	2.65205
ENSMUSG00000073555	Gm4951	2.52492	2.84326	2.62667	4.0454	4.55085	6.94787	3.988	4.49115	5.41089
ENSMUSG00000073557	Ppp1r12b	7.503	11.1133	9.3917	9.30793	9.15279	10.2024	6.7321	2.86091	7.36172
ENSMUSG00000073601	Serpinb3c	4.79357	4.47144	3.5947	12.1815	7.26231	3.66141	7.85282	15.2367	8.56866
ENSMUSG00000073643	Wdfy1	2.73944	2.2964	3.32141	6.3309	5.60981	5.63012	8.94133	10.9663	4.86071
ENSMUSG00000073676	Hspe1	26.7273	28.7516	24.0153	35.8177	27.1455	37.0574	30.5894	45.9588	40.1855
ENSMUSG00000073771	Btbd19	3.32382	2.56976	1.93162	2.5527	2.70665	2.27899	3.98374	4.91013	3.04798
ENSMUSG00000073830	Mup14	0.27011	1.17627	0.916067	2.18165	5.72419	3.00681	0.335069	1.14971	1.36509
ENSMUSG00000073834	Mup11	1.37739	8.52875	1.71741	11.7016	6.02539	7.87834	1.0234	1.73569	5.35132
ENSMUSG00000073842	Mup7	4.75009	12.0353	4.91045	35.0908	55.1596	39.8427	6.47277	12.044	13.9672
ENSMUSG00000073888	Ccl27a	15.4736	8.86511	10.169	10.1257	6.23289	9.26486	5.87686	4.6682	6.07026
ENSMUSG00000073982	Rhog	3.45777	3.92373	3.62154	4.12632	4.3956	4.28471	8.06999	9.69767	4.772
ENSMUSG00000073987	Ggh	63.4281	35.8093	34.1846	59.8443	68.6126	36.3747	69.3842	57.8543	98.6777
ENSMUSG00000073988	Ttpa	1.53815	1.13034	1.35528	2.00745	1.22112	1.44058	1.88156	3.57503	1.95634
ENSMUSG00000074001	Klhl40	6.77686	9.85583	9.90591	11.9312	9.9108	11.022	13.9934	14.9812	10.1325
ENSMUSG00000074165	Zfp788	3.06878	3.10545	3.66849	3.5278	3.52064	4.69123	2.47657	2.15398	2.60779
ENSMUSG00000074179	Gm10639	1.55903	0.349446	0.365908	0.225827	0.579475	0.539883	2.37005	1.28404	1.34407
ENSMUSG00000074183	Gsta1	9.88178	2.44053	4.06143	4.8667	6.84886	2.93809	15.9849	12.1961	10.6355
ENSMUSG00000074206	Adh6b	4.08591	1.9304	2.86448	1.00614	1.8923	1.77412	1.81304	1.01465	2.513
ENSMUSG00000074419	Gm15448	0.555179	0.437685	0.210056	0.584557	0.595527	1.20898	1.26657	3.92419	1.02556
ENSMUSG00000074433	Lce3e	0.893065	0.915086	0	5.64015	1.78739	0.449838	13.5222	29.1275	14.6552
ENSMUSG00000074445	Sprr2a3	1.54284	0.469101	0.180238	5.1751	2.89153	0.416569	10.2159	9.27912	1.92472
ENSMUSG00000074457	S100a16	151.098	100.532	90.3329	115.702	106.216	102.075	143.889	155.387	160.234
ENSMUSG00000074491	Clec4g	1.06361	0.807055	2.47552	1.26986	0.90862	1.96641	0.499771	0.252714	0.684126
ENSMUSG00000074564	Gm10720	1.30857	2.33123	1.77993	0.0585874	2.1394	0.76399	7.62445	7.86176	6.49303
ENSMUSG00000074578	1500012F01Rik	12.4131	9.02872	10.7116	17.3845	11.9765	10.726	17.9428	17.4323	17.3021
ENSMUSG00000074604	Mgst2	15.9997	5.96442	7.63819	10.4245	13.6169	10.262	20.9801	15.0625	27.3097
ENSMUSG00000074647	Fam83c	6.2686	4.2791	2.39257	3.32548	4.3695	2.95572	6.14673	5.72337	5.79618
ENSMUSG00000074677	Sirpb1c	1.73695	1.27819	0.529402	2.94651	2.42333	2.41004	7.84727	20.4467	2.27584
ENSMUSG00000074743	Thbd	13.0937	14.1021	19.5164	16.292	19.8576	20.1704	22.4043	29.1966	20.2401
ENSMUSG00000074896	Ifit3	5.50996	7.77782	6.31836	20.6263	8.82875	20.0459	24.6522	61.232	10.1738
ENSMUSG00000074923	Pak6	4.95501	3.64574	2.29929	2.82468	3.4847	2.65184	5.46932	8.75224	4.64143
ENSMUSG00000074934	Grem1	21.6683	10.1377	8.82256	8.2704	6.67331	9.28721	21.1926	20.055	13.8112
ENSMUSG00000075014	Gm10800	411.216	844.108	853.993	44.9166	792.293	478.326	2770.1	3705.85	2413.97
ENSMUSG00000075590	Nrbp2	8.98664	8.80411	8.44624	6.82911	5.6857	8.18664	5.4499	4.45802	5.83014
ENSMUSG00000075595	Zfp652	9.62096	9.83256	10.7873	8.38334	9.21824	8.48296	7.59838	5.20489	6.95501
ENSMUSG00000075705	Msrb1	18.6387	18.2412	20.024	19.8639	19.9372	25.8577	24.9594	36.7828	22.1012
ENSMUSG00000076441	Ass1	13.9482	10.4399	5.59346	18.3338	13.857	7.6918	22.2371	29.9804	13.3839
ENSMUSG00000078453	Abracl	25.6905	19.1964	19.187	28.6545	22.1102	23.4407	30.7895	40.3257	28.0032
ENSMUSG00000078502	Gm13212	0.82399	0.509152	0.766385	1.10775	0.887607	1.01307	3.93667	3.21791	0.630272
ENSMUSG00000078598	Skint5	36.0281	27.0074	43.1053	29.7858	37.1777	43.3251	8.62497	4.66819	31.6184
ENSMUSG00000078606	Gm4070	0.322825	0.966513	1.93208	1.5104	1.72602	3.10987	3.75433	6.05684	2.12095
ENSMUSG00000078673	Mup19	1.44554	2.05799	1.10916	4.98343	4.97234	11.5449	1.37937	2.17966	2.75361
ENSMUSG00000078675	Mup16	10.9376	30.4644	13.2915	30.5153	86.7334	73.1551	5.62461	11.3185	51.4603
ENSMUSG00000078680	Mup10	201.145	360.166	278.302	405.352	1121.96	818.532	141.91	241.268	557.247
ENSMUSG00000078683	Mup1	0.0502263	0.765538	0.0501001	1.43469	2.44128	1.93538	0	0.506334	0.659969
ENSMUSG00000078688	Mup2	2.68272	6.12768	2.57104	7.61644	18.2042	14.5264	1.74007	2.35683	7.76259
ENSMUSG00000078763	Slfn1	3.3287	1.61324	1.04966	6.09208	3.69516	8.61999	17.0719	79.021	6.38175
ENSMUSG00000078780	Gm5150	0.660567	0.395537	0.230617	2.27727	0.866896	1.30804	6.3847	15.7231	2.23672
ENSMUSG00000078783	Gm9733	0.807255	0.103395	0	1.40318	0.507775	0.762404	2.69983	10.7443	1.24791
ENSMUSG00000078942	Naip6	0.809168	0.721349	0.848076	0.999161	0.991802	1.19874	1.32138	1.89154	0.966043
ENSMUSG00000079017	Ifi27l2a	64.4433	89.1705	201.532	176.946	192.568	287.255	244.295	524.368	307.08
ENSMUSG00000079025	Gsdmc	9.64959	3.25971	0.178548	20.2756	16.2142	3.18741	39.1774	42.615	24.4741
ENSMUSG00000079055	Slc8a3	1.95306	2.69439	2.66198	3.27476	3.07254	2.71285	2.16538	0.275545	2.00422
ENSMUSG00000079110	Capn3	4.80515	7.09873	8.10169	7.42871	8.82737	8.42363	4.05467	0.706344	7.1642
ENSMUSG00000079227	Ccr5	5.00213	4.96657	3.85859	7.52849	6.15933	9.38039	15.5817	74.3028	7.19969
ENSMUSG00000079243	Xirp1	6.43034	7.30904	3.87805	4.76144	4.54904	5.14661	12.3498	12.5237	6.51257
ENSMUSG00000079278	Tmem233	3.81395	7.9526	11.9451	6.97216	10.133	13.4578	2.48921	0.325836	8.28172
ENSMUSG00000079339	Gm14446	0.663894	0.307851	0.233005	1.64692	1.26686	0.973798	4.47363	12.215	1.19296
ENSMUSG00000079355	Ackr4	9.71364	8.5338	8.34776	8.06904	5.75978	9.20444	4.05946	3.77027	5.89557
ENSMUSG00000079362-2	#N/A	0.215583	0.333528	0.645124	0.614686	0.805193	0.716547	0.950075	0.889656	1.21567
ENSMUSG00000079362-3	#N/A	3.49825	3.73782	4.10034	4.8624	4.79885	7.10146	5.15105	7.20288	5.88066
ENSMUSG00000079419	Ms4a6c	8.81384	8.65714	7.93185	15.8557	12.6449	19.9462	28.0546	66.2979	19.4034
ENSMUSG00000079426	Arpc4	54.0498	47.7087	48.3379	56.5385	49.4911	62.1189	71.7515	101.983	64.7201
ENSMUSG00000079428	Tceal7	1.89639	7.94421	4.85243	12.0603	6.05151	8.51647	3.70768	1.20062	3.54192
ENSMUSG00000079451	Tmprss11g	0.445865	0.288214	0.180678	2.04489	0.595968	0.253533	1.85804	3.41792	0.746412
ENSMUSG00000079465	Col4a3	2.16203	2.32323	2.0259	1.21229	2.52936	0.540974	1.63996	0.843936	0.969668
ENSMUSG00000079523	Tmsb10	39.6124	46.3463	48.942	51.1789	43.8212	39.1303	68.7358	62.8462	59.0181
ENSMUSG00000079588	Tmem182	17.7959	18.1702	27.7092	25.5277	25.2485	25.987	16.2543	7.92009	22.3039
ENSMUSG00000079597	Gm5483	5.60812	1.57902	0	21.048	8.36557	1.55243	31.0858	17.004	4.10476
ENSMUSG00000079700	Fpr3	0.507091	0.48712	0.267785	2.84996	1.39186	1.53253	3.4844	13.9996	2.20094
ENSMUSG00000081225	Cyp2j12	9.30413	7.82624	5.18329	8.11244	4.55228	6.06763	3.73682	3.842	4.56719
ENSMUSG00000081977-2	#N/A	108.914	43.6699	12.6373	66.3797	123.754	29.1553	142.88	91.4169	167.917
ENSMUSG00000081977-3	#N/A	312.253	127.745	34.4909	177.924	340.386	83.9607	399.859	252.1	433.778
ENSMUSG00000082361	Btc	14.3085	13.6835	27.6981	10.3372	18.3746	26.4889	5.3381	3.50789	9.90427
ENSMUSG00000086564	Cd101	0.450223	0.326771	0.267879	0.855806	0.522129	0.583356	0.947159	2.20301	0.950055
ENSMUSG00000089773	Skint1	11.8803	7.70712	8.00069	8.38289	8.81312	9.47563	4.04862	2.52809	8.14345
ENSMUSG00000089844	A530032D15Rik	0.5366	0.262888	0.294388	1.29493	0.756371	0.172307	1.60865	2.01353	0.759325
ENSMUSG00000089942	Pira2	2.10358	1.92428	1.7134	3.56776	2.64993	3.54395	5.32704	19.0174	3.23337
ENSMUSG00000090015	Gm15446	3.58037	3.41768	4.32862	2.60706	3.99911	2.52559	1.62258	0.218333	2.03239
ENSMUSG00000090356	Teddm3	69.2951	30.521	23.2741	55.5733	55.0605	27.2086	91.1882	109.021	92.6921
ENSMUSG00000090527	Gm5538	33.8054	26.1233	16.7733	36.429	23.1483	38.4762	19.8883	14.7355	24.5636
ENSMUSG00000090942	F830016B08Rik	0.915644	2.21402	1.33217	2.85517	2.73918	2.29586	1.92446	1.36562	1.69249
ENSMUSG00000090946	Ccdc71l	6.74442	6.01894	6.84168	7.13723	6.75774	6.81048	8.96721	13.8266	9.60554
ENSMUSG00000091028	Gm10722	1.03896	2.12915	1.95077	0	2.55466	0.981232	5.87548	7.11942	5.74487
ENSMUSG00000091175	9130204L05Rik	1.89457	36.7943	29.6882	9.87238	3.08936	0.327077	0.44224	2.46442	2.40914
ENSMUSG00000091345	Col6a5	0.392705	0.622718	0.344883	0.933387	0.730312	0.689903	0.472145	0.272532	0.534995
ENSMUSG00000091376	Aadacl2	13.1064	6.5628	7.44816	7.65618	11.4467	8.60306	12.6169	15.8385	16.8916
ENSMUSG00000091387	Gcnt4	2.1005	2.10584	1.62794	1.82336	1.3368	1.71453	0.866987	0.964819	0.954633
ENSMUSG00000091649	Phf11b	1.90756	2.29373	2.07317	5.07589	3.12751	8.31953	9.59476	28.5105	4.57562
ENSMUSG00000091712	Sec14l5	0.956128	1.91445	1.86743	1.27765	2.5349	1.85358	0.552946	0.247148	1.26378
ENSMUSG00000092074	Dynlt1a	4.85543	3.99394	3.98221	7.06752	5.66403	3.75345	8.92314	5.98252	8.77931
ENSMUSG00000094230	Gm21847	0.22489	0.244837	0.560811	0	0.765163	0.441309	2.47976	2.68696	0.947125
ENSMUSG00000094472	Gm21897	71.0348	107.379	87.5571	31.9087	71.0684	69.933	99.2243	124.039	94.2349
ENSMUSG00000094856	Gm21962	122.843	196.886	146.95	43.1669	121.444	117.071	196.948	248.574	185.784
ENSMUSG00000095186	Gm10718	156.732	389.429	340.073	16.2898	240.983	155.626	781.226	1146.69	651.573
ENSMUSG00000095280	Gm21738	1.46096	4.32629	4.31358	0.287805	3.9198	2.68967	11.78	14.9899	10.8684
ENSMUSG00000095304	Plac9a	1.13461	1.58266	1.09639	0.698482	1.2753	0.455417	0.403181	0.476585	0.824276
ENSMUSG00000095547	Gm10719	129.558	264.603	222.441	16.1171	275.977	143.616	1040.81	1026.45	607.095
ENSMUSG00000095620	2010005H15Rik	0.375872	0.272807	0	1.85114	1.46156	0	4.92169	7.85905	2.40614
ENSMUSG00000095677	Dynlt1f	5.40682	4.21229	4.79949	7.62202	6.17223	5.73419	9.43509	11.1124	7.97191
ENSMUSG00000095687	Rnaset2a	9.5704	11.077	9.41949	11.2745	11.3435	12.2518	13.2459	21.6536	13.0478
ENSMUSG00000095788	Sirpb1a	1.17501	0.726834	0.506114	1.99908	1.73932	1.60069	3.47833	6.84994	1.48457
ENSMUSG00000095891	Gm10717	4.60526	10.4774	7.71504	0.290777	10.1016	5.43488	38.5125	50.1294	31.3306
ENSMUSG00000096001	2610528A11Rik	4.66945	1.43131	0.226103	24.0237	10.7091	1.06754	47.3328	73.2247	11.8222
ENSMUSG00000096054	Syne1	5.27271	6.46727	6.22563	5.41138	5.93391	7.44157	3.57105	2.74529	3.93732
ENSMUSG00000096201	Gm10715	0.530594	1.2195	1.35255	0	1.0889	0.757239	3.65665	5.34894	2.08563
ENSMUSG00000096255	Dynlt1b	7.40739	6.79399	5.41506	19.1899	6.31304	11.8386	20.7692	24.5505	9.53838
ENSMUSG00000096519	Gm10721	54.7815	120.965	126.494	7.9093	112.405	70.4781	408.154	529.07	372.628
ENSMUSG00000096674	Mup15	0.173104	4.28742	0.172669	7.54485	2.1876	4.63212	0.313154	0.727114	0.918578
ENSMUSG00000096768	Erdr1	4.88676	9.02447	4.51003	2.72159	2.79701	3.69077	0	2.9415	2.33119
ENSMUSG00000100210	Hist1h3f	125.201	138.219	71.8417	165.949	96.0948	79.8825	135.314	195.215	151.676
ENSMUSG00000101389	Ms4a4a	5.46863	4.45985	6.36734	6.58135	11.7341	6.045	18.2545	19.8466	15.5172
ENSMUSG00000101725	Gm29423	0.703521	1.79992	1.19298	0.103944	0.786487	0	1.34543	1.69426	1.70662
ENSMUSG00000102252	Snrpn	2.36204	3.58663	3.47215	2.83679	2.77957	2.75002	1.43506	0.789087	1.78012
ENSMUSG00000102308	RP24-157G15.1	16.5693	10.422	7.54298	12.1321	13.623	6.09859	15.4827	23.5339	20.5376
ENSMUSG00000102395	AC158361.1	125.54	58.3501	12.7923	65.3869	130.29	35.0315	167.325	113.55	186.459
ENSMUSG00000102692	Dchs2	0.410927	0.418278	0.343245	0.440955	0.454679	0.346868	0.238299	0.123492	0.246509
ENSMUSG00000102724	AC158361.2	172.941	87.1619	19.1811	94.4593	205.987	53.2048	245.508	164.347	271.483
ENSMUSG00000102829	AC158361.3	325.785	150.103	32.3277	167.764	334.66	91.3385	423.161	295.03	468.066
ENSMUSG00000103335	AC158361.4	239.786	111.829	25.7193	126.638	270.686	69.8563	330.821	215.167	368.424
ENSMUSG00000103750	AC158361.5	79.0171	36.7189	7.78609	38.4014	80.9119	20.0162	101.705	69.7127	114.38

## Sheet: Figure 2B
WT vs STAT3+IL-17A	WT vs STAT3	STAT3 vs STAT3+IL-17A			venn	online software Venny 2.1
ENSMUSG00000000037	ENSMUSG00000000202	ENSMUSG00000000037
ENSMUSG00000000085	ENSMUSG00000000204	ENSMUSG00000000184
ENSMUSG00000000120	ENSMUSG00000000214	ENSMUSG00000000223
ENSMUSG00000000125	ENSMUSG00000000290	ENSMUSG00000000247
ENSMUSG00000000184	ENSMUSG00000000386	ENSMUSG00000000253
ENSMUSG00000000202	ENSMUSG00000000392	ENSMUSG00000000308
ENSMUSG00000000204	ENSMUSG00000000682	ENSMUSG00000000416
ENSMUSG00000000216	ENSMUSG00000000693	ENSMUSG00000000435
ENSMUSG00000000223	ENSMUSG00000000958	ENSMUSG00000000805
ENSMUSG00000000253	ENSMUSG00000000983	ENSMUSG00000000983
ENSMUSG00000000305	ENSMUSG00000001240	ENSMUSG00000001025
ENSMUSG00000000325	ENSMUSG00000001270	ENSMUSG00000001056
ENSMUSG00000000402	ENSMUSG00000001300	ENSMUSG00000001128
ENSMUSG00000000416	ENSMUSG00000001349	ENSMUSG00000001131
ENSMUSG00000000567	ENSMUSG00000001504	ENSMUSG00000001156
ENSMUSG00000000594	ENSMUSG00000001507	ENSMUSG00000001334
ENSMUSG00000000730	ENSMUSG00000001865	ENSMUSG00000001507
ENSMUSG00000000876	ENSMUSG00000001870	ENSMUSG00000001508
ENSMUSG00000000901	ENSMUSG00000002111	ENSMUSG00000001604
ENSMUSG00000000982	ENSMUSG00000002289	ENSMUSG00000001739
ENSMUSG00000000983	ENSMUSG00000002324	ENSMUSG00000002032
ENSMUSG00000001123	ENSMUSG00000002341	ENSMUSG00000002033
ENSMUSG00000001128	ENSMUSG00000002699	ENSMUSG00000002228
ENSMUSG00000001131	ENSMUSG00000002799	ENSMUSG00000002289
ENSMUSG00000001156	ENSMUSG00000003283	ENSMUSG00000002297
ENSMUSG00000001270	ENSMUSG00000003484	ENSMUSG00000002500
ENSMUSG00000001300	ENSMUSG00000004707	ENSMUSG00000002797
ENSMUSG00000001334	ENSMUSG00000004730	ENSMUSG00000002808
ENSMUSG00000001349	ENSMUSG00000004892	ENSMUSG00000002992
ENSMUSG00000001506	ENSMUSG00000004902	ENSMUSG00000003227
ENSMUSG00000001508	ENSMUSG00000005836	ENSMUSG00000003271
ENSMUSG00000001542	ENSMUSG00000007888	ENSMUSG00000003476
ENSMUSG00000001604	ENSMUSG00000008999	ENSMUSG00000003541
ENSMUSG00000001739	ENSMUSG00000009185	ENSMUSG00000003585
ENSMUSG00000001751	ENSMUSG00000010358	ENSMUSG00000003865
ENSMUSG00000002028	ENSMUSG00000012519	ENSMUSG00000003934
ENSMUSG00000002103	ENSMUSG00000014453	ENSMUSG00000003949
ENSMUSG00000002228	ENSMUSG00000015340	ENSMUSG00000004530
ENSMUSG00000002324	ENSMUSG00000015354	ENSMUSG00000004558
ENSMUSG00000002325	ENSMUSG00000015355	ENSMUSG00000004885
ENSMUSG00000002341	ENSMUSG00000015619	ENSMUSG00000005054
ENSMUSG00000002475	ENSMUSG00000015947	ENSMUSG00000005320
ENSMUSG00000002500	ENSMUSG00000015950	ENSMUSG00000005481
ENSMUSG00000002565	ENSMUSG00000016024	ENSMUSG00000005583
ENSMUSG00000002699	ENSMUSG00000016206	ENSMUSG00000005628
ENSMUSG00000002797	ENSMUSG00000016496	ENSMUSG00000005716
ENSMUSG00000002885	ENSMUSG00000017390	ENSMUSG00000005994
ENSMUSG00000002992	ENSMUSG00000017830	ENSMUSG00000006179
ENSMUSG00000003062	ENSMUSG00000018168	ENSMUSG00000006269
ENSMUSG00000003153	ENSMUSG00000018654	ENSMUSG00000006273
ENSMUSG00000003227	ENSMUSG00000018740	ENSMUSG00000006435
ENSMUSG00000003271	ENSMUSG00000018830	ENSMUSG00000006457
ENSMUSG00000003469	ENSMUSG00000018924	ENSMUSG00000006542
ENSMUSG00000003476	ENSMUSG00000018930	ENSMUSG00000006589
ENSMUSG00000003484	ENSMUSG00000019102	ENSMUSG00000006642
ENSMUSG00000003541	ENSMUSG00000019577	ENSMUSG00000006731
ENSMUSG00000003721	ENSMUSG00000019874	ENSMUSG00000007122
ENSMUSG00000003872	ENSMUSG00000020042	ENSMUSG00000008226
ENSMUSG00000003949	ENSMUSG00000020077	ENSMUSG00000008575
ENSMUSG00000003955	ENSMUSG00000020120	ENSMUSG00000008601
ENSMUSG00000004070	ENSMUSG00000020140	ENSMUSG00000008658
ENSMUSG00000004451	ENSMUSG00000020176	ENSMUSG00000009097
ENSMUSG00000004473	ENSMUSG00000020186	ENSMUSG00000009281
ENSMUSG00000004707	ENSMUSG00000020638	ENSMUSG00000009772
ENSMUSG00000004730	ENSMUSG00000020641	ENSMUSG00000009900
ENSMUSG00000004846	ENSMUSG00000020653	ENSMUSG00000010080
ENSMUSG00000004885	ENSMUSG00000020932	ENSMUSG00000010601
ENSMUSG00000004892	ENSMUSG00000021190	ENSMUSG00000011034
ENSMUSG00000004902	ENSMUSG00000021423	ENSMUSG00000011148
ENSMUSG00000004988	ENSMUSG00000021448	ENSMUSG00000011632
ENSMUSG00000005054	ENSMUSG00000021451	ENSMUSG00000011752
ENSMUSG00000005268	ENSMUSG00000021567	ENSMUSG00000011884
ENSMUSG00000005320	ENSMUSG00000021624	ENSMUSG00000013419
ENSMUSG00000005355	ENSMUSG00000021822	ENSMUSG00000014453
ENSMUSG00000005413	ENSMUSG00000021886	ENSMUSG00000014813
ENSMUSG00000006019	ENSMUSG00000021998	ENSMUSG00000016194
ENSMUSG00000006179	ENSMUSG00000022014	ENSMUSG00000016349
ENSMUSG00000006269	ENSMUSG00000022126	ENSMUSG00000016763
ENSMUSG00000006273	ENSMUSG00000022132	ENSMUSG00000017002
ENSMUSG00000006344	ENSMUSG00000022148	ENSMUSG00000017204
ENSMUSG00000006589	ENSMUSG00000022225	ENSMUSG00000017639
ENSMUSG00000006642	ENSMUSG00000022378	ENSMUSG00000017697
ENSMUSG00000006731	ENSMUSG00000022488	ENSMUSG00000017724
ENSMUSG00000007030	ENSMUSG00000022686	ENSMUSG00000017760
ENSMUSG00000007038	ENSMUSG00000022831	ENSMUSG00000018217
ENSMUSG00000007888	ENSMUSG00000022876	ENSMUSG00000018334
ENSMUSG00000007989	ENSMUSG00000022906	ENSMUSG00000018341
ENSMUSG00000008036	ENSMUSG00000023992	ENSMUSG00000018378
ENSMUSG00000008136	ENSMUSG00000024176	ENSMUSG00000018411
ENSMUSG00000008348	ENSMUSG00000024180	ENSMUSG00000018648
ENSMUSG00000008475	ENSMUSG00000024222	ENSMUSG00000018800
ENSMUSG00000008575	ENSMUSG00000024300	ENSMUSG00000018821
ENSMUSG00000009185	ENSMUSG00000024381	ENSMUSG00000018845
ENSMUSG00000009281	ENSMUSG00000024397	ENSMUSG00000018868
ENSMUSG00000009356	ENSMUSG00000024401	ENSMUSG00000018893
ENSMUSG00000009772	ENSMUSG00000024556	ENSMUSG00000018907
ENSMUSG00000010080	ENSMUSG00000024677	ENSMUSG00000019194
ENSMUSG00000010358	ENSMUSG00000024679	ENSMUSG00000019528
ENSMUSG00000010601	ENSMUSG00000024696	ENSMUSG00000019787
ENSMUSG00000011034	ENSMUSG00000024781	ENSMUSG00000019791
ENSMUSG00000011148	ENSMUSG00000024965	ENSMUSG00000019878
ENSMUSG00000011632	ENSMUSG00000025017	ENSMUSG00000019932
ENSMUSG00000011752	ENSMUSG00000025044	ENSMUSG00000020007
ENSMUSG00000013236	ENSMUSG00000025064	ENSMUSG00000020032
ENSMUSG00000013419	ENSMUSG00000025213	ENSMUSG00000020053
ENSMUSG00000013707	ENSMUSG00000025355	ENSMUSG00000020061
ENSMUSG00000014592	ENSMUSG00000025453	ENSMUSG00000020062
ENSMUSG00000014602	ENSMUSG00000025498	ENSMUSG00000020142
ENSMUSG00000015224	ENSMUSG00000025551	ENSMUSG00000020183
ENSMUSG00000015312	ENSMUSG00000025804	ENSMUSG00000020326
ENSMUSG00000015340	ENSMUSG00000025877	ENSMUSG00000020390
ENSMUSG00000015354	ENSMUSG00000025892	ENSMUSG00000020411
ENSMUSG00000015619	ENSMUSG00000026104	ENSMUSG00000020431
ENSMUSG00000015665	ENSMUSG00000026126	ENSMUSG00000020538
ENSMUSG00000015854	ENSMUSG00000026177	ENSMUSG00000020601
ENSMUSG00000015950	ENSMUSG00000026222	ENSMUSG00000020733
ENSMUSG00000016087	ENSMUSG00000026249	ENSMUSG00000020803
ENSMUSG00000016256	ENSMUSG00000026288	ENSMUSG00000020810
ENSMUSG00000016262	ENSMUSG00000026358	ENSMUSG00000020839
ENSMUSG00000016349	ENSMUSG00000026395	ENSMUSG00000020840
ENSMUSG00000016496	ENSMUSG00000026480	ENSMUSG00000020866
ENSMUSG00000016529	ENSMUSG00000026536	ENSMUSG00000020882
ENSMUSG00000017002	ENSMUSG00000026579	ENSMUSG00000020911
ENSMUSG00000017057	ENSMUSG00000026581	ENSMUSG00000021091
ENSMUSG00000017390	ENSMUSG00000026582	ENSMUSG00000021118
ENSMUSG00000017639	ENSMUSG00000026628	ENSMUSG00000021203
ENSMUSG00000017697	ENSMUSG00000026768	ENSMUSG00000021242
ENSMUSG00000017760	ENSMUSG00000026840	ENSMUSG00000021263
ENSMUSG00000018293	ENSMUSG00000027009	ENSMUSG00000021322
ENSMUSG00000018341	ENSMUSG00000027318	ENSMUSG00000021373
ENSMUSG00000018378	ENSMUSG00000027360	ENSMUSG00000021466
ENSMUSG00000018459	ENSMUSG00000027398	ENSMUSG00000021477
ENSMUSG00000018593	ENSMUSG00000027460	ENSMUSG00000021486
ENSMUSG00000018648	ENSMUSG00000027932	ENSMUSG00000021509
ENSMUSG00000018750	ENSMUSG00000027962	ENSMUSG00000021553
ENSMUSG00000018800	ENSMUSG00000028031	ENSMUSG00000021569
ENSMUSG00000018821	ENSMUSG00000028037	ENSMUSG00000021591
ENSMUSG00000018830	ENSMUSG00000028268	ENSMUSG00000021622
ENSMUSG00000018868	ENSMUSG00000028434	ENSMUSG00000021670
ENSMUSG00000018893	ENSMUSG00000028480	ENSMUSG00000021748
ENSMUSG00000018899	ENSMUSG00000028497	ENSMUSG00000021768
ENSMUSG00000018907	ENSMUSG00000028528	ENSMUSG00000021798
ENSMUSG00000018920	ENSMUSG00000028551	ENSMUSG00000021835
ENSMUSG00000018924	ENSMUSG00000028581	ENSMUSG00000021953
ENSMUSG00000018927	ENSMUSG00000028751	ENSMUSG00000021983
ENSMUSG00000018930	ENSMUSG00000028859	ENSMUSG00000021991
ENSMUSG00000018965	ENSMUSG00000028874	ENSMUSG00000022103
ENSMUSG00000019102	ENSMUSG00000028931	ENSMUSG00000022111
ENSMUSG00000019124	ENSMUSG00000029299	ENSMUSG00000022129
ENSMUSG00000019359	ENSMUSG00000029322	ENSMUSG00000022215
ENSMUSG00000019368	ENSMUSG00000029366	ENSMUSG00000022218
ENSMUSG00000019528	ENSMUSG00000029553	ENSMUSG00000022357
ENSMUSG00000019820	ENSMUSG00000029561	ENSMUSG00000022358
ENSMUSG00000019852	ENSMUSG00000029798	ENSMUSG00000022383
ENSMUSG00000019872	ENSMUSG00000029915	ENSMUSG00000022449
ENSMUSG00000019874	ENSMUSG00000030116	ENSMUSG00000022464
ENSMUSG00000019878	ENSMUSG00000030142	ENSMUSG00000022468
ENSMUSG00000019880	ENSMUSG00000030148	ENSMUSG00000022519
ENSMUSG00000019899	ENSMUSG00000030187	ENSMUSG00000022525
ENSMUSG00000020007	ENSMUSG00000030247	ENSMUSG00000022591
ENSMUSG00000020032	ENSMUSG00000030307	ENSMUSG00000022594
ENSMUSG00000020038	ENSMUSG00000030310	ENSMUSG00000022602
ENSMUSG00000020044	ENSMUSG00000030325	ENSMUSG00000022629
ENSMUSG00000020062	ENSMUSG00000030427	ENSMUSG00000022656
ENSMUSG00000020077	ENSMUSG00000030428	ENSMUSG00000022657
ENSMUSG00000020120	ENSMUSG00000030579	ENSMUSG00000022758
ENSMUSG00000020159	ENSMUSG00000030739	ENSMUSG00000022822
ENSMUSG00000020183	ENSMUSG00000030921	ENSMUSG00000022883
ENSMUSG00000020251	ENSMUSG00000031216	ENSMUSG00000022899
ENSMUSG00000020277	ENSMUSG00000031273	ENSMUSG00000022902
ENSMUSG00000020376	ENSMUSG00000031274	ENSMUSG00000022987
ENSMUSG00000020399	ENSMUSG00000031595	ENSMUSG00000022995
ENSMUSG00000020407	ENSMUSG00000031673	ENSMUSG00000022996
ENSMUSG00000020427	ENSMUSG00000031712	ENSMUSG00000023021
ENSMUSG00000020431	ENSMUSG00000031740	ENSMUSG00000023809
ENSMUSG00000020439	ENSMUSG00000031760	ENSMUSG00000023826
ENSMUSG00000020571	ENSMUSG00000031825	ENSMUSG00000023861
ENSMUSG00000020599	ENSMUSG00000032224	ENSMUSG00000023905
ENSMUSG00000020601	ENSMUSG00000032369	ENSMUSG00000024030
ENSMUSG00000020638	ENSMUSG00000032482	ENSMUSG00000024039
ENSMUSG00000020641	ENSMUSG00000032487	ENSMUSG00000024049
ENSMUSG00000020709	ENSMUSG00000032661	ENSMUSG00000024076
ENSMUSG00000020733	ENSMUSG00000032691	ENSMUSG00000024121
ENSMUSG00000020790	ENSMUSG00000032724	ENSMUSG00000024136
ENSMUSG00000020803	ENSMUSG00000032849	ENSMUSG00000024140
ENSMUSG00000020811	ENSMUSG00000033220	ENSMUSG00000024172
ENSMUSG00000020839	ENSMUSG00000033268	ENSMUSG00000024186
ENSMUSG00000020840	ENSMUSG00000033453	ENSMUSG00000024210
ENSMUSG00000020866	ENSMUSG00000033777	ENSMUSG00000024302
ENSMUSG00000020902	ENSMUSG00000033880	ENSMUSG00000024340
ENSMUSG00000020911	ENSMUSG00000034116	ENSMUSG00000024371
ENSMUSG00000020932	ENSMUSG00000034422	ENSMUSG00000024381
ENSMUSG00000021009	ENSMUSG00000034459	ENSMUSG00000024597
ENSMUSG00000021036	ENSMUSG00000034570	ENSMUSG00000024665
ENSMUSG00000021061	ENSMUSG00000035004	ENSMUSG00000024784
ENSMUSG00000021091	ENSMUSG00000035151	ENSMUSG00000024900
ENSMUSG00000021190	ENSMUSG00000035208	ENSMUSG00000024922
ENSMUSG00000021203	ENSMUSG00000035273	ENSMUSG00000024952
ENSMUSG00000021214	ENSMUSG00000035299	ENSMUSG00000025068
ENSMUSG00000021242	ENSMUSG00000035352	ENSMUSG00000025161
ENSMUSG00000021263	ENSMUSG00000035357	ENSMUSG00000025172
ENSMUSG00000021322	ENSMUSG00000035373	ENSMUSG00000025202
ENSMUSG00000021384	ENSMUSG00000035385	ENSMUSG00000025283
ENSMUSG00000021423	ENSMUSG00000035493	ENSMUSG00000025329
ENSMUSG00000021448	ENSMUSG00000035692	ENSMUSG00000025351
ENSMUSG00000021451	ENSMUSG00000035783	ENSMUSG00000025359
ENSMUSG00000021457	ENSMUSG00000035805	ENSMUSG00000025407
ENSMUSG00000021477	ENSMUSG00000036218	ENSMUSG00000025481
ENSMUSG00000021486	ENSMUSG00000036381	ENSMUSG00000025534
ENSMUSG00000021494	ENSMUSG00000036437	ENSMUSG00000025537
ENSMUSG00000021553	ENSMUSG00000036469	ENSMUSG00000025658
ENSMUSG00000021567	ENSMUSG00000036545	ENSMUSG00000025776
ENSMUSG00000021591	ENSMUSG00000036699	ENSMUSG00000025938
ENSMUSG00000021614	ENSMUSG00000036887	ENSMUSG00000025997
ENSMUSG00000021622	ENSMUSG00000036896	ENSMUSG00000026062
ENSMUSG00000021662	ENSMUSG00000036905	ENSMUSG00000026126
ENSMUSG00000021676	ENSMUSG00000037605	ENSMUSG00000026167
ENSMUSG00000021751	ENSMUSG00000037731	ENSMUSG00000026173
ENSMUSG00000021763	ENSMUSG00000037849-3	ENSMUSG00000026208
ENSMUSG00000021822	ENSMUSG00000037921	ENSMUSG00000026327
ENSMUSG00000021835	ENSMUSG00000038112	ENSMUSG00000026407
ENSMUSG00000021871	ENSMUSG00000038147	ENSMUSG00000026489
ENSMUSG00000021939	ENSMUSG00000038301	ENSMUSG00000026494
ENSMUSG00000021953	ENSMUSG00000038393	ENSMUSG00000026547
ENSMUSG00000021983	ENSMUSG00000038418	ENSMUSG00000026604
ENSMUSG00000021991	ENSMUSG00000038642	ENSMUSG00000026610
ENSMUSG00000021996	ENSMUSG00000038843	ENSMUSG00000026645
ENSMUSG00000022012	ENSMUSG00000039013	ENSMUSG00000026656
ENSMUSG00000022014	ENSMUSG00000039239	ENSMUSG00000026676
ENSMUSG00000022032	ENSMUSG00000039533	ENSMUSG00000026697
ENSMUSG00000022111	ENSMUSG00000039774	ENSMUSG00000026778
ENSMUSG00000022122	ENSMUSG00000039936	ENSMUSG00000026784
ENSMUSG00000022123	ENSMUSG00000040247	ENSMUSG00000026817
ENSMUSG00000022126	ENSMUSG00000040296	ENSMUSG00000026822
ENSMUSG00000022129	ENSMUSG00000040328	ENSMUSG00000026828
ENSMUSG00000022132	ENSMUSG00000040483	ENSMUSG00000026950
ENSMUSG00000022180	ENSMUSG00000040522	ENSMUSG00000026971
ENSMUSG00000022197	ENSMUSG00000040552	ENSMUSG00000026981
ENSMUSG00000022199	ENSMUSG00000040613	ENSMUSG00000026983
ENSMUSG00000022218	ENSMUSG00000040710	ENSMUSG00000026984
ENSMUSG00000022221	ENSMUSG00000040740	ENSMUSG00000026985
ENSMUSG00000022225	ENSMUSG00000040747	ENSMUSG00000026989
ENSMUSG00000022229	ENSMUSG00000040809	ENSMUSG00000027004
ENSMUSG00000022296	ENSMUSG00000040896	ENSMUSG00000027010
ENSMUSG00000022357	ENSMUSG00000041608	ENSMUSG00000027015
ENSMUSG00000022358	ENSMUSG00000041754	ENSMUSG00000027068
ENSMUSG00000022383	ENSMUSG00000041827	ENSMUSG00000027111
ENSMUSG00000022451	ENSMUSG00000042010	ENSMUSG00000027165
ENSMUSG00000022464	ENSMUSG00000042121	ENSMUSG00000027215
ENSMUSG00000022468	ENSMUSG00000042228	ENSMUSG00000027253
ENSMUSG00000022505	ENSMUSG00000042254	ENSMUSG00000027298
ENSMUSG00000022519	ENSMUSG00000042286	ENSMUSG00000027333
ENSMUSG00000022587	ENSMUSG00000042750	ENSMUSG00000027375
ENSMUSG00000022591	ENSMUSG00000043004	ENSMUSG00000027399
ENSMUSG00000022602	ENSMUSG00000043008	ENSMUSG00000027401
ENSMUSG00000022629	ENSMUSG00000043263	ENSMUSG00000027408
ENSMUSG00000022651	ENSMUSG00000043740	ENSMUSG00000027423
ENSMUSG00000022656	ENSMUSG00000043832	ENSMUSG00000027456
ENSMUSG00000022686	ENSMUSG00000044345	ENSMUSG00000027460
ENSMUSG00000022687	ENSMUSG00000044433	ENSMUSG00000027499
ENSMUSG00000022762	ENSMUSG00000044583	ENSMUSG00000027524
ENSMUSG00000022769	ENSMUSG00000044734	ENSMUSG00000027533
ENSMUSG00000022807	ENSMUSG00000044788	ENSMUSG00000027605
ENSMUSG00000022822	ENSMUSG00000044811	ENSMUSG00000027611
ENSMUSG00000022836	ENSMUSG00000044827	ENSMUSG00000027613
ENSMUSG00000022841	ENSMUSG00000045404	ENSMUSG00000027777
ENSMUSG00000022876	ENSMUSG00000046240	ENSMUSG00000027784
ENSMUSG00000022883	ENSMUSG00000046718	ENSMUSG00000027805
ENSMUSG00000022899	ENSMUSG00000046879	ENSMUSG00000027907
ENSMUSG00000022900	ENSMUSG00000047085	ENSMUSG00000027966
ENSMUSG00000022902	ENSMUSG00000047261	ENSMUSG00000027978
ENSMUSG00000022906	ENSMUSG00000047420	ENSMUSG00000027993
ENSMUSG00000022947	ENSMUSG00000047735	ENSMUSG00000028023
ENSMUSG00000022969	ENSMUSG00000047810	ENSMUSG00000028033
ENSMUSG00000022986	ENSMUSG00000049037	ENSMUSG00000028048
ENSMUSG00000022995	ENSMUSG00000049103	ENSMUSG00000028134
ENSMUSG00000022996	ENSMUSG00000049115	ENSMUSG00000028194
ENSMUSG00000023021	ENSMUSG00000049130	ENSMUSG00000028262
ENSMUSG00000023031	ENSMUSG00000049313	ENSMUSG00000028402
ENSMUSG00000023041	ENSMUSG00000049929	ENSMUSG00000028435
ENSMUSG00000023272	ENSMUSG00000051262	ENSMUSG00000028464
ENSMUSG00000023341	ENSMUSG00000051439	ENSMUSG00000028467
ENSMUSG00000023349	ENSMUSG00000052013	ENSMUSG00000028487
ENSMUSG00000023903	ENSMUSG00000052026	ENSMUSG00000028518
ENSMUSG00000023912	ENSMUSG00000052160	ENSMUSG00000028555
ENSMUSG00000023992	ENSMUSG00000052336	ENSMUSG00000028645
ENSMUSG00000024013	ENSMUSG00000052477	ENSMUSG00000028655
ENSMUSG00000024026	ENSMUSG00000052504	ENSMUSG00000028681
ENSMUSG00000024030	ENSMUSG00000052749	ENSMUSG00000028737
ENSMUSG00000024039	ENSMUSG00000052776	ENSMUSG00000028776
ENSMUSG00000024049	ENSMUSG00000053025	ENSMUSG00000028780
ENSMUSG00000024076	ENSMUSG00000053054	ENSMUSG00000028871
ENSMUSG00000024085	ENSMUSG00000053063	ENSMUSG00000028965
ENSMUSG00000024121	ENSMUSG00000053398	ENSMUSG00000028996
ENSMUSG00000024136	ENSMUSG00000053835	ENSMUSG00000029090
ENSMUSG00000024176	ENSMUSG00000054072	ENSMUSG00000029093
ENSMUSG00000024186	ENSMUSG00000054404	ENSMUSG00000029095
ENSMUSG00000024222	ENSMUSG00000054580	ENSMUSG00000029154
ENSMUSG00000024299	ENSMUSG00000055022	ENSMUSG00000029158
ENSMUSG00000024304	ENSMUSG00000055368	ENSMUSG00000029188
ENSMUSG00000024340	ENSMUSG00000055541	ENSMUSG00000029211
ENSMUSG00000024371	ENSMUSG00000055653	ENSMUSG00000029236
ENSMUSG00000024401	ENSMUSG00000056144	ENSMUSG00000029321
ENSMUSG00000024459	ENSMUSG00000057191	ENSMUSG00000029359
ENSMUSG00000024521	ENSMUSG00000057346	ENSMUSG00000029373
ENSMUSG00000024526	ENSMUSG00000057596	ENSMUSG00000029432
ENSMUSG00000024556	ENSMUSG00000058715	ENSMUSG00000029465
ENSMUSG00000024597	ENSMUSG00000058755	ENSMUSG00000029470
ENSMUSG00000024654	ENSMUSG00000058818	ENSMUSG00000029499
ENSMUSG00000024661	ENSMUSG00000059089	ENSMUSG00000029622
ENSMUSG00000024665	ENSMUSG00000059430	ENSMUSG00000029683
ENSMUSG00000024672	ENSMUSG00000059498	ENSMUSG00000029727
ENSMUSG00000024677	ENSMUSG00000059991	ENSMUSG00000029752
ENSMUSG00000024679	ENSMUSG00000060131	ENSMUSG00000029769
ENSMUSG00000024696	ENSMUSG00000060791	ENSMUSG00000029838
ENSMUSG00000024697	ENSMUSG00000061068	ENSMUSG00000029862
ENSMUSG00000024725	ENSMUSG00000061143	ENSMUSG00000030091
ENSMUSG00000024727	ENSMUSG00000062184	ENSMUSG00000030214
ENSMUSG00000024730	ENSMUSG00000062488	ENSMUSG00000030246
ENSMUSG00000024737	ENSMUSG00000062593	ENSMUSG00000030255
ENSMUSG00000024781	ENSMUSG00000063415	ENSMUSG00000030256
ENSMUSG00000024784	ENSMUSG00000064267	ENSMUSG00000030268
ENSMUSG00000024818	ENSMUSG00000064294	ENSMUSG00000030399
ENSMUSG00000024909	ENSMUSG00000068245	ENSMUSG00000030401
ENSMUSG00000024922	ENSMUSG00000068735	ENSMUSG00000030409
ENSMUSG00000025044	ENSMUSG00000068748	ENSMUSG00000030484
ENSMUSG00000025068	ENSMUSG00000068923	ENSMUSG00000030510
ENSMUSG00000025150	ENSMUSG00000069306	ENSMUSG00000030523
ENSMUSG00000025154	ENSMUSG00000069515	ENSMUSG00000030554
ENSMUSG00000025161	ENSMUSG00000069874	ENSMUSG00000030592
ENSMUSG00000025185	ENSMUSG00000069911	ENSMUSG00000030672
ENSMUSG00000025202	ENSMUSG00000070031	ENSMUSG00000030713
ENSMUSG00000025213	ENSMUSG00000070034	ENSMUSG00000030717
ENSMUSG00000025283	ENSMUSG00000070323	ENSMUSG00000030730
ENSMUSG00000025329	ENSMUSG00000070327	ENSMUSG00000030785
ENSMUSG00000025355	ENSMUSG00000071715	ENSMUSG00000030793
ENSMUSG00000025359	ENSMUSG00000072620	ENSMUSG00000030867
ENSMUSG00000025453	ENSMUSG00000072812	ENSMUSG00000030996
ENSMUSG00000025473	ENSMUSG00000073125	ENSMUSG00000031097
ENSMUSG00000025481	ENSMUSG00000073412	ENSMUSG00000031098
ENSMUSG00000025492	ENSMUSG00000073491	ENSMUSG00000031119
ENSMUSG00000025498	ENSMUSG00000073555	ENSMUSG00000031147
ENSMUSG00000025534	ENSMUSG00000073643	ENSMUSG00000031200
ENSMUSG00000025551	ENSMUSG00000073830	ENSMUSG00000031239
ENSMUSG00000025586	ENSMUSG00000073842	ENSMUSG00000031273
ENSMUSG00000025630	ENSMUSG00000074206	ENSMUSG00000031284
ENSMUSG00000025648	ENSMUSG00000074677	ENSMUSG00000031299
ENSMUSG00000025656	ENSMUSG00000074896	ENSMUSG00000031312
ENSMUSG00000025658	ENSMUSG00000078673	ENSMUSG00000031372
ENSMUSG00000025666	ENSMUSG00000078675	ENSMUSG00000031425
ENSMUSG00000025776	ENSMUSG00000078680	ENSMUSG00000031450
ENSMUSG00000025804	ENSMUSG00000078683	ENSMUSG00000031451
ENSMUSG00000025823	ENSMUSG00000078688	ENSMUSG00000031461
ENSMUSG00000025927	ENSMUSG00000078763	ENSMUSG00000031517
ENSMUSG00000025978	ENSMUSG00000078780	ENSMUSG00000031548
ENSMUSG00000025997	ENSMUSG00000079227	ENSMUSG00000031561
ENSMUSG00000026029	ENSMUSG00000079339	ENSMUSG00000031596
ENSMUSG00000026094	ENSMUSG00000079419	ENSMUSG00000031618
ENSMUSG00000026104	ENSMUSG00000079700	ENSMUSG00000031673
ENSMUSG00000026126	ENSMUSG00000089942	ENSMUSG00000031722
ENSMUSG00000026177	ENSMUSG00000090942	ENSMUSG00000031750
ENSMUSG00000026180	ENSMUSG00000091345	ENSMUSG00000031765
ENSMUSG00000026185	ENSMUSG00000091649	ENSMUSG00000031791
ENSMUSG00000026208	ENSMUSG00000094472	ENSMUSG00000031824
ENSMUSG00000026222	ENSMUSG00000094856	ENSMUSG00000031834
ENSMUSG00000026249	ENSMUSG00000095788	ENSMUSG00000031939
ENSMUSG00000026327	ENSMUSG00000096768	ENSMUSG00000031990
ENSMUSG00000026358		ENSMUSG00000032009
ENSMUSG00000026407		ENSMUSG00000032011
ENSMUSG00000026433		ENSMUSG00000032012
ENSMUSG00000026463		ENSMUSG00000032062
ENSMUSG00000026480		ENSMUSG00000032091
ENSMUSG00000026489		ENSMUSG00000032093
ENSMUSG00000026494		ENSMUSG00000032179
ENSMUSG00000026536		ENSMUSG00000032204
ENSMUSG00000026547		ENSMUSG00000032289
ENSMUSG00000026579		ENSMUSG00000032324
ENSMUSG00000026589		ENSMUSG00000032349
ENSMUSG00000026604		ENSMUSG00000032355
ENSMUSG00000026610		ENSMUSG00000032366
ENSMUSG00000026645		ENSMUSG00000032373
ENSMUSG00000026656		ENSMUSG00000032454
ENSMUSG00000026676		ENSMUSG00000032492
ENSMUSG00000026726		ENSMUSG00000032523
ENSMUSG00000026768		ENSMUSG00000032527
ENSMUSG00000026822		ENSMUSG00000032528
ENSMUSG00000026840		ENSMUSG00000032549
ENSMUSG00000026864		ENSMUSG00000032649
ENSMUSG00000026875		ENSMUSG00000032719
ENSMUSG00000026880		ENSMUSG00000032739
ENSMUSG00000026950		ENSMUSG00000032807
ENSMUSG00000026981		ENSMUSG00000032816
ENSMUSG00000026983		ENSMUSG00000032841
ENSMUSG00000026984		ENSMUSG00000032854
ENSMUSG00000026985		ENSMUSG00000032883
ENSMUSG00000026989		ENSMUSG00000032911
ENSMUSG00000027004		ENSMUSG00000033065
ENSMUSG00000027015		ENSMUSG00000033182
ENSMUSG00000027068		ENSMUSG00000033196
ENSMUSG00000027077		ENSMUSG00000033200
ENSMUSG00000027078		ENSMUSG00000033268
ENSMUSG00000027215		ENSMUSG00000033400
ENSMUSG00000027217		ENSMUSG00000033685
ENSMUSG00000027246		ENSMUSG00000033721
ENSMUSG00000027253		ENSMUSG00000033852
ENSMUSG00000027293		ENSMUSG00000033880
ENSMUSG00000027298		ENSMUSG00000034006
ENSMUSG00000027318		ENSMUSG00000034164
ENSMUSG00000027322		ENSMUSG00000034295
ENSMUSG00000027333		ENSMUSG00000034324
ENSMUSG00000027360		ENSMUSG00000034362
ENSMUSG00000027397		ENSMUSG00000034460
ENSMUSG00000027398		ENSMUSG00000034641
ENSMUSG00000027399		ENSMUSG00000034656
ENSMUSG00000027401		ENSMUSG00000034675
ENSMUSG00000027408		ENSMUSG00000034687
ENSMUSG00000027423		ENSMUSG00000034708
ENSMUSG00000027456		ENSMUSG00000034898
ENSMUSG00000027489		ENSMUSG00000034910
ENSMUSG00000027524		ENSMUSG00000034919
ENSMUSG00000027533		ENSMUSG00000034981
ENSMUSG00000027611		ENSMUSG00000035020
ENSMUSG00000027613		ENSMUSG00000035296
ENSMUSG00000027639		ENSMUSG00000035606
ENSMUSG00000027692		ENSMUSG00000035642
ENSMUSG00000027709		ENSMUSG00000036334
ENSMUSG00000027737		ENSMUSG00000036353
ENSMUSG00000027750		ENSMUSG00000036594
ENSMUSG00000027784		ENSMUSG00000036745
ENSMUSG00000027805		ENSMUSG00000036814
ENSMUSG00000027808		ENSMUSG00000036815
ENSMUSG00000027962		ENSMUSG00000036853
ENSMUSG00000027966		ENSMUSG00000036856
ENSMUSG00000027993		ENSMUSG00000036879
ENSMUSG00000028023		ENSMUSG00000037016
ENSMUSG00000028031		ENSMUSG00000037169
ENSMUSG00000028037		ENSMUSG00000037279
ENSMUSG00000028082		ENSMUSG00000037280
ENSMUSG00000028088		ENSMUSG00000037348
ENSMUSG00000028134		ENSMUSG00000037440
ENSMUSG00000028167		ENSMUSG00000037465
ENSMUSG00000028194		ENSMUSG00000037469
ENSMUSG00000028268		ENSMUSG00000037490
ENSMUSG00000028364		ENSMUSG00000037577
ENSMUSG00000028367		ENSMUSG00000037736
ENSMUSG00000028381		ENSMUSG00000037813
ENSMUSG00000028402		ENSMUSG00000037887
ENSMUSG00000028434		ENSMUSG00000037922
ENSMUSG00000028435		ENSMUSG00000037977
ENSMUSG00000028459		ENSMUSG00000038094
ENSMUSG00000028467		ENSMUSG00000038119
ENSMUSG00000028476		ENSMUSG00000038132
ENSMUSG00000028478		ENSMUSG00000038170
ENSMUSG00000028480		ENSMUSG00000038205
ENSMUSG00000028497		ENSMUSG00000038239
ENSMUSG00000028517		ENSMUSG00000038403
ENSMUSG00000028518		ENSMUSG00000038524
ENSMUSG00000028519		ENSMUSG00000038633
ENSMUSG00000028528		ENSMUSG00000038650
ENSMUSG00000028532		ENSMUSG00000038663
ENSMUSG00000028555		ENSMUSG00000038677
ENSMUSG00000028645		ENSMUSG00000038725
ENSMUSG00000028680		ENSMUSG00000038751
ENSMUSG00000028751		ENSMUSG00000038768
ENSMUSG00000028776		ENSMUSG00000039037
ENSMUSG00000028843		ENSMUSG00000039208
ENSMUSG00000028862		ENSMUSG00000039347
ENSMUSG00000028871		ENSMUSG00000039431
ENSMUSG00000028919		ENSMUSG00000039542
ENSMUSG00000028927		ENSMUSG00000039813
ENSMUSG00000028943		ENSMUSG00000039883
ENSMUSG00000029090		ENSMUSG00000039891
ENSMUSG00000029098		ENSMUSG00000039987
ENSMUSG00000029120		ENSMUSG00000040026
ENSMUSG00000029188		ENSMUSG00000040055
ENSMUSG00000029211		ENSMUSG00000040118
ENSMUSG00000029236		ENSMUSG00000040127
ENSMUSG00000029304		ENSMUSG00000040254
ENSMUSG00000029321		ENSMUSG00000040270
ENSMUSG00000029322		ENSMUSG00000040287
ENSMUSG00000029359		ENSMUSG00000040310
ENSMUSG00000029361		ENSMUSG00000040350
ENSMUSG00000029373		ENSMUSG00000040488
ENSMUSG00000029379		ENSMUSG00000040522
ENSMUSG00000029401		ENSMUSG00000040666
ENSMUSG00000029438		ENSMUSG00000040690
ENSMUSG00000029465		ENSMUSG00000040694
ENSMUSG00000029470		ENSMUSG00000040998
ENSMUSG00000029503		ENSMUSG00000041202
ENSMUSG00000029553		ENSMUSG00000041329
ENSMUSG00000029561		ENSMUSG00000041372
ENSMUSG00000029605		ENSMUSG00000041440
ENSMUSG00000029616		ENSMUSG00000041650
ENSMUSG00000029622		ENSMUSG00000041660
ENSMUSG00000029661		ENSMUSG00000041695
ENSMUSG00000029673-2		ENSMUSG00000041707
ENSMUSG00000029727		ENSMUSG00000041735
ENSMUSG00000029752		ENSMUSG00000041736
ENSMUSG00000029762		ENSMUSG00000041782
ENSMUSG00000029769		ENSMUSG00000041870
ENSMUSG00000029798		ENSMUSG00000041889
ENSMUSG00000029822		ENSMUSG00000041984
ENSMUSG00000029838		ENSMUSG00000042124
ENSMUSG00000029915		ENSMUSG00000042155
ENSMUSG00000030029		ENSMUSG00000042212
ENSMUSG00000030064		ENSMUSG00000042244
ENSMUSG00000030093		ENSMUSG00000042254
ENSMUSG00000030104		ENSMUSG00000042258
ENSMUSG00000030142		ENSMUSG00000042268
ENSMUSG00000030144		ENSMUSG00000042306
ENSMUSG00000030170		ENSMUSG00000042436
ENSMUSG00000030187		ENSMUSG00000042476
ENSMUSG00000030200		ENSMUSG00000042515
ENSMUSG00000030220		ENSMUSG00000042532
ENSMUSG00000030225		ENSMUSG00000042686
ENSMUSG00000030228-2		ENSMUSG00000042793
ENSMUSG00000030228-3		ENSMUSG00000043091
ENSMUSG00000030246		ENSMUSG00000043252
ENSMUSG00000030255		ENSMUSG00000043286
ENSMUSG00000030256		ENSMUSG00000043472
ENSMUSG00000030257		ENSMUSG00000043557
ENSMUSG00000030263		ENSMUSG00000043587
ENSMUSG00000030303		ENSMUSG00000043613
ENSMUSG00000030307		ENSMUSG00000043631
ENSMUSG00000030310		ENSMUSG00000043702
ENSMUSG00000030319		ENSMUSG00000043727
ENSMUSG00000030365		ENSMUSG00000043924
ENSMUSG00000030413		ENSMUSG00000044086
ENSMUSG00000030452		ENSMUSG00000044103
ENSMUSG00000030484		ENSMUSG00000044156
ENSMUSG00000030510		ENSMUSG00000044165
ENSMUSG00000030554		ENSMUSG00000044206
ENSMUSG00000030560		ENSMUSG00000044294
ENSMUSG00000030579		ENSMUSG00000044461
ENSMUSG00000030616		ENSMUSG00000044499
ENSMUSG00000030643		ENSMUSG00000044938
ENSMUSG00000030713		ENSMUSG00000045027
ENSMUSG00000030717		ENSMUSG00000045103
ENSMUSG00000030739		ENSMUSG00000045349
ENSMUSG00000030768		ENSMUSG00000045475
ENSMUSG00000030787		ENSMUSG00000045761
ENSMUSG00000030844		ENSMUSG00000045776
ENSMUSG00000030849		ENSMUSG00000046095
ENSMUSG00000030852		ENSMUSG00000046157
ENSMUSG00000030862		ENSMUSG00000046167
ENSMUSG00000030935		ENSMUSG00000046259
ENSMUSG00000030946		ENSMUSG00000046345
ENSMUSG00000030994		ENSMUSG00000046352
ENSMUSG00000030996		ENSMUSG00000046354
ENSMUSG00000031098		ENSMUSG00000046480
ENSMUSG00000031119		ENSMUSG00000046490
ENSMUSG00000031147		ENSMUSG00000046546
ENSMUSG00000031216		ENSMUSG00000046603
ENSMUSG00000031220		ENSMUSG00000046668
ENSMUSG00000031250		ENSMUSG00000046694
ENSMUSG00000031266		ENSMUSG00000046818
ENSMUSG00000031273		ENSMUSG00000046971
ENSMUSG00000031274		ENSMUSG00000047216
ENSMUSG00000031284		ENSMUSG00000047281
ENSMUSG00000031372		ENSMUSG00000047361
ENSMUSG00000031380		ENSMUSG00000047414
ENSMUSG00000031402		ENSMUSG00000047419
ENSMUSG00000031450		ENSMUSG00000047586
ENSMUSG00000031461		ENSMUSG00000047592
ENSMUSG00000031517		ENSMUSG00000047746
ENSMUSG00000031555		ENSMUSG00000047787
ENSMUSG00000031558		ENSMUSG00000047884
ENSMUSG00000031561		ENSMUSG00000048027
ENSMUSG00000031595		ENSMUSG00000048279
ENSMUSG00000031596		ENSMUSG00000048373
ENSMUSG00000031618		ENSMUSG00000048399
ENSMUSG00000031661		ENSMUSG00000048402
ENSMUSG00000031722		ENSMUSG00000048455
ENSMUSG00000031748		ENSMUSG00000048766
ENSMUSG00000031750		ENSMUSG00000049001
ENSMUSG00000031760		ENSMUSG00000049122
ENSMUSG00000031765		ENSMUSG00000049128
ENSMUSG00000031803		ENSMUSG00000049173
ENSMUSG00000031824		ENSMUSG00000049214
ENSMUSG00000031841		ENSMUSG00000049493
ENSMUSG00000031906		ENSMUSG00000049971
ENSMUSG00000031939		ENSMUSG00000050063
ENSMUSG00000032009		ENSMUSG00000050071
ENSMUSG00000032062		ENSMUSG00000050211
ENSMUSG00000032115		ENSMUSG00000050335
ENSMUSG00000032122		ENSMUSG00000050359
ENSMUSG00000032232		ENSMUSG00000050730
ENSMUSG00000032278		ENSMUSG00000050737
ENSMUSG00000032281		ENSMUSG00000050762
ENSMUSG00000032289		ENSMUSG00000050777
ENSMUSG00000032291		ENSMUSG00000050854
ENSMUSG00000032324		ENSMUSG00000051359
ENSMUSG00000032327		ENSMUSG00000051910
ENSMUSG00000032340		ENSMUSG00000052026
ENSMUSG00000032348		ENSMUSG00000052353
ENSMUSG00000032349		ENSMUSG00000052397
ENSMUSG00000032381		ENSMUSG00000052852
ENSMUSG00000032382		ENSMUSG00000052920
ENSMUSG00000032420		ENSMUSG00000052957
ENSMUSG00000032454		ENSMUSG00000053198
ENSMUSG00000032482		ENSMUSG00000053317
ENSMUSG00000032487		ENSMUSG00000053522
ENSMUSG00000032495		ENSMUSG00000053716
ENSMUSG00000032515		ENSMUSG00000054005
ENSMUSG00000032528		ENSMUSG00000054146
ENSMUSG00000032549		ENSMUSG00000054499
ENSMUSG00000032661		ENSMUSG00000054659
ENSMUSG00000032690		ENSMUSG00000054672
ENSMUSG00000032691		ENSMUSG00000054905
ENSMUSG00000032702		ENSMUSG00000055027
ENSMUSG00000032718		ENSMUSG00000055489
ENSMUSG00000032719		ENSMUSG00000055493
ENSMUSG00000032724		ENSMUSG00000055653
ENSMUSG00000032725		ENSMUSG00000055775
ENSMUSG00000032802		ENSMUSG00000055960
ENSMUSG00000032807		ENSMUSG00000055980
ENSMUSG00000032826		ENSMUSG00000056515
ENSMUSG00000032854		ENSMUSG00000056569
ENSMUSG00000032883		ENSMUSG00000056724
ENSMUSG00000032911		ENSMUSG00000056737
ENSMUSG00000032925		ENSMUSG00000056966
ENSMUSG00000032997		ENSMUSG00000057191
ENSMUSG00000033006		ENSMUSG00000057454
ENSMUSG00000033065		ENSMUSG00000057722
ENSMUSG00000033389		ENSMUSG00000057751
ENSMUSG00000033419		ENSMUSG00000057897
ENSMUSG00000033427		ENSMUSG00000058672
ENSMUSG00000033453		ENSMUSG00000058966
ENSMUSG00000033538		ENSMUSG00000059022
ENSMUSG00000033542		ENSMUSG00000059146
ENSMUSG00000033544		ENSMUSG00000059325
ENSMUSG00000033595		ENSMUSG00000059493
ENSMUSG00000033721		ENSMUSG00000059498
ENSMUSG00000033763		ENSMUSG00000059668
ENSMUSG00000033852		ENSMUSG00000059900
ENSMUSG00000033880		ENSMUSG00000060201
ENSMUSG00000034006		ENSMUSG00000060206
ENSMUSG00000034109		ENSMUSG00000060477
ENSMUSG00000034295		ENSMUSG00000060548
ENSMUSG00000034324		ENSMUSG00000060586
ENSMUSG00000034362		ENSMUSG00000060591
ENSMUSG00000034459		ENSMUSG00000060621
ENSMUSG00000034460		ENSMUSG00000060678
ENSMUSG00000034462		ENSMUSG00000060981
ENSMUSG00000034463		ENSMUSG00000061080
ENSMUSG00000034573		ENSMUSG00000061353
ENSMUSG00000034641		ENSMUSG00000061462
ENSMUSG00000034652		ENSMUSG00000061603
ENSMUSG00000034663		ENSMUSG00000061723
ENSMUSG00000034708		ENSMUSG00000061816
ENSMUSG00000034765		ENSMUSG00000062184
ENSMUSG00000034910		ENSMUSG00000062345
ENSMUSG00000034919		ENSMUSG00000062694
ENSMUSG00000034949		ENSMUSG00000062929
ENSMUSG00000035004		ENSMUSG00000063142
ENSMUSG00000035020		ENSMUSG00000063296
ENSMUSG00000035105		ENSMUSG00000063428
ENSMUSG00000035168		ENSMUSG00000063522
ENSMUSG00000035236		ENSMUSG00000063651
ENSMUSG00000035273		ENSMUSG00000063727
ENSMUSG00000035299		ENSMUSG00000063730
ENSMUSG00000035357		ENSMUSG00000063856
ENSMUSG00000035376		ENSMUSG00000064115
ENSMUSG00000035692		ENSMUSG00000064179
ENSMUSG00000035805		ENSMUSG00000064232
ENSMUSG00000035861		ENSMUSG00000066279
ENSMUSG00000035877		ENSMUSG00000066364
ENSMUSG00000036218		ENSMUSG00000066705
ENSMUSG00000036278		ENSMUSG00000066756
ENSMUSG00000036353		ENSMUSG00000067455
ENSMUSG00000036381		ENSMUSG00000067597
ENSMUSG00000036469		ENSMUSG00000067786
ENSMUSG00000036552-3		ENSMUSG00000068617
ENSMUSG00000036596		ENSMUSG00000068697
ENSMUSG00000036617		ENSMUSG00000068876
ENSMUSG00000036699		ENSMUSG00000068885
ENSMUSG00000036814		ENSMUSG00000069273
ENSMUSG00000036832		ENSMUSG00000069300
ENSMUSG00000036887		ENSMUSG00000069372
ENSMUSG00000036896		ENSMUSG00000069609
ENSMUSG00000036905		ENSMUSG00000069769
ENSMUSG00000036908		ENSMUSG00000069808
ENSMUSG00000036931		ENSMUSG00000070031
ENSMUSG00000037016		ENSMUSG00000070305
ENSMUSG00000037095		ENSMUSG00000070424
ENSMUSG00000037111		ENSMUSG00000070576
ENSMUSG00000037138		ENSMUSG00000070609
ENSMUSG00000037279		ENSMUSG00000071342
ENSMUSG00000037280		ENSMUSG00000071540
ENSMUSG00000037348		ENSMUSG00000071547
ENSMUSG00000037469		ENSMUSG00000071562
ENSMUSG00000037490		ENSMUSG00000072572
ENSMUSG00000037580		ENSMUSG00000072941
ENSMUSG00000037605		ENSMUSG00000072966
ENSMUSG00000037661		ENSMUSG00000073557
ENSMUSG00000037669		ENSMUSG00000073771
ENSMUSG00000037736		ENSMUSG00000073830
ENSMUSG00000037813		ENSMUSG00000073834
ENSMUSG00000037849-3		ENSMUSG00000073842
ENSMUSG00000037887		ENSMUSG00000073982
ENSMUSG00000037944		ENSMUSG00000074165
ENSMUSG00000037953		ENSMUSG00000074179
ENSMUSG00000037962		ENSMUSG00000074183
ENSMUSG00000037966		ENSMUSG00000074433
ENSMUSG00000037989		ENSMUSG00000074457
ENSMUSG00000038067		ENSMUSG00000074491
ENSMUSG00000038094		ENSMUSG00000074564
ENSMUSG00000038119		ENSMUSG00000074604
ENSMUSG00000038143		ENSMUSG00000074647
ENSMUSG00000038147		ENSMUSG00000074923
ENSMUSG00000038170		ENSMUSG00000074934
ENSMUSG00000038204		ENSMUSG00000075014
ENSMUSG00000038233		ENSMUSG00000078598
ENSMUSG00000038239		ENSMUSG00000078673
ENSMUSG00000038298		ENSMUSG00000078683
ENSMUSG00000038352		ENSMUSG00000078688
ENSMUSG00000038412		ENSMUSG00000079025
ENSMUSG00000038540		ENSMUSG00000079055
ENSMUSG00000038587		ENSMUSG00000079110
ENSMUSG00000038623		ENSMUSG00000079243
ENSMUSG00000038641		ENSMUSG00000079278
ENSMUSG00000038650		ENSMUSG00000079355
ENSMUSG00000038665		ENSMUSG00000079426
ENSMUSG00000038725		ENSMUSG00000079428
ENSMUSG00000038776		ENSMUSG00000079523
ENSMUSG00000038777		ENSMUSG00000079588
ENSMUSG00000038811		ENSMUSG00000082361
ENSMUSG00000038843		ENSMUSG00000089773
ENSMUSG00000038859		ENSMUSG00000090015
ENSMUSG00000038910		ENSMUSG00000090356
ENSMUSG00000039055		ENSMUSG00000090527
ENSMUSG00000039114		ENSMUSG00000090946
ENSMUSG00000039126		ENSMUSG00000091028
ENSMUSG00000039221		ENSMUSG00000091345
ENSMUSG00000039232		ENSMUSG00000091376
ENSMUSG00000039239		ENSMUSG00000091712
ENSMUSG00000039323		ENSMUSG00000094230
ENSMUSG00000039347		ENSMUSG00000094472
ENSMUSG00000039533		ENSMUSG00000094856
ENSMUSG00000039542		ENSMUSG00000095186
ENSMUSG00000039607		ENSMUSG00000095280
ENSMUSG00000039628		ENSMUSG00000095547
ENSMUSG00000039661		ENSMUSG00000095620
ENSMUSG00000039835		ENSMUSG00000095891
ENSMUSG00000039853		ENSMUSG00000096054
ENSMUSG00000039891		ENSMUSG00000096201
ENSMUSG00000040026		ENSMUSG00000096519
ENSMUSG00000040055		ENSMUSG00000096674
ENSMUSG00000040127		ENSMUSG00000101389
ENSMUSG00000040152		ENSMUSG00000101725
ENSMUSG00000040209		ENSMUSG00000102252
ENSMUSG00000040212		ENSMUSG00000102308
ENSMUSG00000040253		ENSMUSG00000102395
ENSMUSG00000040254		ENSMUSG00000102692
ENSMUSG00000040270		ENSMUSG00000102829
ENSMUSG00000040345		ENSMUSG00000103750
ENSMUSG00000040389
ENSMUSG00000040483
ENSMUSG00000040488
ENSMUSG00000040522
ENSMUSG00000040528
ENSMUSG00000040650
ENSMUSG00000040666
ENSMUSG00000040690
ENSMUSG00000040710
ENSMUSG00000040724
ENSMUSG00000040747
ENSMUSG00000040774
ENSMUSG00000040809
ENSMUSG00000040852
ENSMUSG00000040896
ENSMUSG00000040998
ENSMUSG00000041075
ENSMUSG00000041193
ENSMUSG00000041423
ENSMUSG00000041440
ENSMUSG00000041559
ENSMUSG00000041660
ENSMUSG00000041695
ENSMUSG00000041735
ENSMUSG00000041736
ENSMUSG00000041754
ENSMUSG00000041827
ENSMUSG00000041842
ENSMUSG00000041870
ENSMUSG00000041889
ENSMUSG00000041926
ENSMUSG00000041984
ENSMUSG00000042010
ENSMUSG00000042124
ENSMUSG00000042155
ENSMUSG00000042212
ENSMUSG00000042244
ENSMUSG00000042254
ENSMUSG00000042268
ENSMUSG00000042286
ENSMUSG00000042436
ENSMUSG00000042453
ENSMUSG00000042476
ENSMUSG00000042500
ENSMUSG00000042532
ENSMUSG00000042644
ENSMUSG00000042688
ENSMUSG00000042750
ENSMUSG00000042793
ENSMUSG00000042810
ENSMUSG00000042845
ENSMUSG00000042961
ENSMUSG00000042988
ENSMUSG00000043004
ENSMUSG00000043154
ENSMUSG00000043252
ENSMUSG00000043263
ENSMUSG00000043472
ENSMUSG00000043587
ENSMUSG00000043613
ENSMUSG00000043631
ENSMUSG00000043702
ENSMUSG00000043727
ENSMUSG00000043822
ENSMUSG00000043991
ENSMUSG00000044103
ENSMUSG00000044156
ENSMUSG00000044206
ENSMUSG00000044294
ENSMUSG00000044345
ENSMUSG00000044433
ENSMUSG00000044461
ENSMUSG00000044583
ENSMUSG00000044594
ENSMUSG00000044734
ENSMUSG00000044748
ENSMUSG00000044786
ENSMUSG00000044788
ENSMUSG00000044864
ENSMUSG00000044949
ENSMUSG00000044966
ENSMUSG00000045103
ENSMUSG00000045349
ENSMUSG00000045404
ENSMUSG00000045475
ENSMUSG00000045502
ENSMUSG00000045776
ENSMUSG00000045875
ENSMUSG00000046095
ENSMUSG00000046157
ENSMUSG00000046167
ENSMUSG00000046203
ENSMUSG00000046223
ENSMUSG00000046240
ENSMUSG00000046259
ENSMUSG00000046352
ENSMUSG00000046354
ENSMUSG00000046532
ENSMUSG00000046546
ENSMUSG00000046688
ENSMUSG00000046694
ENSMUSG00000046718
ENSMUSG00000046743
ENSMUSG00000047045
ENSMUSG00000047085
ENSMUSG00000047139
ENSMUSG00000047216
ENSMUSG00000047281
ENSMUSG00000047361
ENSMUSG00000047562
ENSMUSG00000047586
ENSMUSG00000047592
ENSMUSG00000047730
ENSMUSG00000047735
ENSMUSG00000047787
ENSMUSG00000047884
ENSMUSG00000047898
ENSMUSG00000047992
ENSMUSG00000048027
ENSMUSG00000048120
ENSMUSG00000048388
ENSMUSG00000048399
ENSMUSG00000048402
ENSMUSG00000048455
ENSMUSG00000048534
ENSMUSG00000048779
ENSMUSG00000049001
ENSMUSG00000049037
ENSMUSG00000049112
ENSMUSG00000049122
ENSMUSG00000049128
ENSMUSG00000049130
ENSMUSG00000049133
ENSMUSG00000049134
ENSMUSG00000049214
ENSMUSG00000049404
ENSMUSG00000049493
ENSMUSG00000049721
ENSMUSG00000050063
ENSMUSG00000050195
ENSMUSG00000050295
ENSMUSG00000050315
ENSMUSG00000050359
ENSMUSG00000050447
ENSMUSG00000050578
ENSMUSG00000050708
ENSMUSG00000050730
ENSMUSG00000050737
ENSMUSG00000050762
ENSMUSG00000050777
ENSMUSG00000050854
ENSMUSG00000051043
ENSMUSG00000051225
ENSMUSG00000051359
ENSMUSG00000051439
ENSMUSG00000051682
ENSMUSG00000051747
ENSMUSG00000051910
ENSMUSG00000052062
ENSMUSG00000052102
ENSMUSG00000052160
ENSMUSG00000052353
ENSMUSG00000052477
ENSMUSG00000052516
ENSMUSG00000052557
ENSMUSG00000052681
ENSMUSG00000052727
ENSMUSG00000052749
ENSMUSG00000052776
ENSMUSG00000052920
ENSMUSG00000052942
ENSMUSG00000053007
ENSMUSG00000053040
ENSMUSG00000053054
ENSMUSG00000053198
ENSMUSG00000053317
ENSMUSG00000053522
ENSMUSG00000053687
ENSMUSG00000054005
ENSMUSG00000054046
ENSMUSG00000054072
ENSMUSG00000054146
ENSMUSG00000054499
ENSMUSG00000054580
ENSMUSG00000054659
ENSMUSG00000054676
ENSMUSG00000054905
ENSMUSG00000055030
ENSMUSG00000055368
ENSMUSG00000055866
ENSMUSG00000055960
ENSMUSG00000055963
ENSMUSG00000055980
ENSMUSG00000056054
ENSMUSG00000056071
ENSMUSG00000056144
ENSMUSG00000056174
ENSMUSG00000056201
ENSMUSG00000056209
ENSMUSG00000056293
ENSMUSG00000056296
ENSMUSG00000056515
ENSMUSG00000056569
ENSMUSG00000056602
ENSMUSG00000056656
ENSMUSG00000056671
ENSMUSG00000056724
ENSMUSG00000056737
ENSMUSG00000056888
ENSMUSG00000056900
ENSMUSG00000056966
ENSMUSG00000057191
ENSMUSG00000057337
ENSMUSG00000057346
ENSMUSG00000057454
ENSMUSG00000057606
ENSMUSG00000057722
ENSMUSG00000057766
ENSMUSG00000057880
ENSMUSG00000057897
ENSMUSG00000057969
ENSMUSG00000058163
ENSMUSG00000058260
ENSMUSG00000058427
ENSMUSG00000058624
ENSMUSG00000058690
ENSMUSG00000058715
ENSMUSG00000058755
ENSMUSG00000058914
ENSMUSG00000058966
ENSMUSG00000059013
ENSMUSG00000059049
ENSMUSG00000059146
ENSMUSG00000059430
ENSMUSG00000059498
ENSMUSG00000059657
ENSMUSG00000059668
ENSMUSG00000059883
ENSMUSG00000059900
ENSMUSG00000059956
ENSMUSG00000059991
ENSMUSG00000060063
ENSMUSG00000060201
ENSMUSG00000060206
ENSMUSG00000060429
ENSMUSG00000060548
ENSMUSG00000060560
ENSMUSG00000060591
ENSMUSG00000060621
ENSMUSG00000060678
ENSMUSG00000060791
ENSMUSG00000061080
ENSMUSG00000061353
ENSMUSG00000061462
ENSMUSG00000061577
ENSMUSG00000061603
ENSMUSG00000061666
ENSMUSG00000061751
ENSMUSG00000062464
ENSMUSG00000062939
ENSMUSG00000062991
ENSMUSG00000063458
ENSMUSG00000063506
ENSMUSG00000063522
ENSMUSG00000063531
ENSMUSG00000063651
ENSMUSG00000063727
ENSMUSG00000063821
ENSMUSG00000063856
ENSMUSG00000064023
ENSMUSG00000064109
ENSMUSG00000064115
ENSMUSG00000064232
ENSMUSG00000064246
ENSMUSG00000066364
ENSMUSG00000066442
ENSMUSG00000066756
ENSMUSG00000066800
ENSMUSG00000066842
ENSMUSG00000066861
ENSMUSG00000067594
ENSMUSG00000067597
ENSMUSG00000068036
ENSMUSG00000068115
ENSMUSG00000068220
ENSMUSG00000068246
ENSMUSG00000068335
ENSMUSG00000068617
ENSMUSG00000068876
ENSMUSG00000068885
ENSMUSG00000069248
ENSMUSG00000069273
ENSMUSG00000069300
ENSMUSG00000069306
ENSMUSG00000069609
ENSMUSG00000069769
ENSMUSG00000069793
ENSMUSG00000069892
ENSMUSG00000069893
ENSMUSG00000069911
ENSMUSG00000070003
ENSMUSG00000070031
ENSMUSG00000070047
ENSMUSG00000070372
ENSMUSG00000070419
ENSMUSG00000070424
ENSMUSG00000070609
ENSMUSG00000070719
ENSMUSG00000071540
ENSMUSG00000071547
ENSMUSG00000071562
ENSMUSG00000071604
ENSMUSG00000071757
ENSMUSG00000071847
ENSMUSG00000071856
ENSMUSG00000072596
ENSMUSG00000072720
ENSMUSG00000072812
ENSMUSG00000072845
ENSMUSG00000072889
ENSMUSG00000072964
ENSMUSG00000072966
ENSMUSG00000073468
ENSMUSG00000073491
ENSMUSG00000073555
ENSMUSG00000073557
ENSMUSG00000073601
ENSMUSG00000073643
ENSMUSG00000073676
ENSMUSG00000073888
ENSMUSG00000073982
ENSMUSG00000073987
ENSMUSG00000073988
ENSMUSG00000074001
ENSMUSG00000074183
ENSMUSG00000074419
ENSMUSG00000074433
ENSMUSG00000074445
ENSMUSG00000074564
ENSMUSG00000074578
ENSMUSG00000074604
ENSMUSG00000074677
ENSMUSG00000074743
ENSMUSG00000075014
ENSMUSG00000075590
ENSMUSG00000075595
ENSMUSG00000075705
ENSMUSG00000076441
ENSMUSG00000078453
ENSMUSG00000078502
ENSMUSG00000078598
ENSMUSG00000078606
ENSMUSG00000078780
ENSMUSG00000078783
ENSMUSG00000078942
ENSMUSG00000079017
ENSMUSG00000079025
ENSMUSG00000079243
ENSMUSG00000079339
ENSMUSG00000079355
ENSMUSG00000079362-2
ENSMUSG00000079362-3
ENSMUSG00000079419
ENSMUSG00000079426
ENSMUSG00000079451
ENSMUSG00000079465
ENSMUSG00000079597
ENSMUSG00000079700
ENSMUSG00000081225
ENSMUSG00000081977-2
ENSMUSG00000081977-3
ENSMUSG00000082361
ENSMUSG00000086564
ENSMUSG00000089773
ENSMUSG00000089844
ENSMUSG00000090015
ENSMUSG00000090356
ENSMUSG00000090946
ENSMUSG00000091028
ENSMUSG00000091175
ENSMUSG00000091376
ENSMUSG00000091387
ENSMUSG00000091712
ENSMUSG00000092074
ENSMUSG00000094230
ENSMUSG00000095186
ENSMUSG00000095280
ENSMUSG00000095304
ENSMUSG00000095547
ENSMUSG00000095620
ENSMUSG00000095677
ENSMUSG00000095687
ENSMUSG00000095788
ENSMUSG00000095891
ENSMUSG00000096001
ENSMUSG00000096054
ENSMUSG00000096201
ENSMUSG00000096255
ENSMUSG00000096519
ENSMUSG00000096768
ENSMUSG00000100210
ENSMUSG00000101389
ENSMUSG00000102252
ENSMUSG00000102308
ENSMUSG00000102395
ENSMUSG00000102692
ENSMUSG00000102724
ENSMUSG00000102829
ENSMUSG00000103335
ENSMUSG00000103750

## Sheet: Figure 3 ct
CT	actin	S100a8	S100a9	Sprr2e	Sprr2g	Sprr2d			C	wt
C1	25.1361		25.965	32.072	32.6034	33.736			M	stat3+il17
C2	24.9765	25.6542	26.0493	32.931	32.5271	33.0334			S	stat3
C3	24.2587	24.9572	25.1656	31.0589	31.8362	32.6701
C4	25.6651	25.9606	27.7352	32.0688	34.0637	34.5627
M1	22.8617	21.9198	21.0652	28.7797	28.8578	27.8659
M2	23.3544	22.6552	22.3658	29.0332	29.6665	28.4501
M3	22.0477	20.5382	20.6417	28.0439	29.273	28.0607
M4	24.6663	23.7671	23.6438	30.0432	31.6645	29.8571
S1	24.1361	23.5995	23.2189	30.5486	32.0377	30.9639
S2	25.7721		25.2587	31.9272	33.1276	31.8646
S3	24.8546	24.9609	23.9873			30.4872
S4	24.5666	24.0824	23.4633	30.2613	31.1573	30.2558
CT-Ct actin
		S100a8	S100a9	Sprr2e	Sprr2g	Sprr2d		S100a8	S100a9	Sprr2e	Sprr2g	Sprr2d		S100a8	S100a9	Sprr2e	Sprr2g	Sprr2d		S100a8	S100a9	Sprr2e	Sprr2g	Sprr2d
C1			0.828885	6.93589	7.46728	8.59984	C1		-0.0779481	0	-0.110231	0.188495	C1		1.05552	1	1.0794	0.877521	C	1.11223	0.848335	1.0096	0.916055	0.967453
C2		0.677705	1.07278	7.95453	7.5506	8.05695	C2	-0.0207396	0.165942	1.01864	-0.0269099	-0.354392	C2	1.01448	0.891346	0.493582	1.01883	1.27845	M	3.34965	4.75277	2.31991	2.04177	8.7895
C3		0.698445	0.906833	6.80013	7.57751	8.41135	C3	0	0	-0.13576	0	0	C3	1	1	1.09867	1	1	S	2.04378	3.41651	1.83983	1.31568	5.3619
C4		0.295482	2.07017	6.40368	8.39866	8.89767	C4	-0.402963	1.16334	-0.532209	0.821148	0.486318	C4	1.32222	0.446478	1.44614	0.565991	0.713845
M1		-0.94182	-1.7965	5.91799	5.99617	5.00423	M1	-1.64026	-2.70334	-1.0179	-1.58134	-3.40712	M1	3.11723	6.51307	2.02497	2.99248	10.6083		S100a8	S100a9	Sprr2e	Sprr2g	Sprr2d
M2		-0.699146	-0.988612	5.67881	6.31208	5.09573	M2	-1.39759	-1.89545	-1.25708	-1.26543	-3.31562	M2	2.63461	3.72037	2.39011	2.40398	9.95635	C	0.181998	0.276445	0.393645	0.235822	0.238175
M3		-1.50951	-1.40603	5.99621	7.22531	6.01299	M3	-2.20796	-2.31286	-0.939681	-0.352202	-2.39835	M3	4.6202	4.96869	1.9181	1.27651	5.27201	M	0.872539	1.30409	0.464016	0.800123	2.40313
M4		-0.89924	-1.02256	5.3769	6.99822	5.19081	M4	-1.59768	-1.92939	-1.55898	-0.579291	-3.22054	M4	3.02657	3.80894	2.94646	1.49412	9.32137	S	0.466358	0.559063	0.475162	0.605493	1.78062
S1		-0.536608	-0.917251	6.41246	7.90158	6.82774	S1	-1.23505	-1.82408	-0.523425	0.324071	-1.58361	S1	2.3539	3.54082	1.43736	0.798812	2.99719
S2			-0.513454	6.15507	7.3555	6.0925	S2		-1.42029	-0.780821	-0.22201	-2.31884	S2		2.67639	1.71811	1.16636	4.98932
S3		0.106325	-0.867351	-24.8546		5.63263	S3	-0.592119	-1.77418			-2.77872	S3	1.50746	3.42045			6.86243
S4		-0.484233	-1.10337	5.69465	6.59066	5.68917	S4	-1.18268	-2.01021	-1.24123	-0.986854	-2.72217	S4	2.26998	4.0284	2.36401	1.98186	6.59867
CT	actin	LCE3D	LCE3E	LCE3F
C1	24.0904	32.8934	34.163	32.369
C2	25.2508	33.3551	34.3341	33.2672
C3	24.8594	33.2394	33.9337	34.2427
C4	23.719	31.9409	34.5525	31.4609
M1	24.7028	31.9328	32.8798	31.9209
M2	24.6824	32.7467	33.0241	31.3393
M3	25.8605		33.9987	32.1585
M4	25.1632	31.994	32.6582	31.8439
S1	24.2902	31.5029	31.9314	30.3591
S2	25.4335	32.3465	33.9107	30.2805
S3	25.3887	31.9549	33.3408	31.0634
S4	25.7341			31.2574
		LCE3D	LCE3E	LCE3F			LCE3D	LCE3E	LCE3F				LCE3D	LCE3E	LCE3F				LCE3D	LCE3E	LCE3F
C1		8.803	10.0726	8.27867		C1	0.422975	0.989413	0			C1	0.745885	0.503683	1			C	1.01809	0.701789	1.02878
C2		8.10425	9.08324	8.01635		C2	-0.275779	0	-0.262313			C2	1.21065	1	1.1994			M	2.13015	2.11953	3.03434
C3		8.38002	9.07427	9.3833		C3	0	-0.00896543	1.10463			C3	1	1.00623	0.465022			S	2.84205	2.14317	7.06208
C4		8.2219	10.8335	7.74193		C4	-0.158127	1.7503	-0.536739			C4	1.11584	0.29724	1.45069
M1		7.23003	8.17708	7.2181		M1	-1.14999	-0.906156	-1.06057			M1	2.21913	1.87405	2.08575				LCE3D	LCE3E	LCE3F
M2		8.06434	8.34175	6.65691		M2	-0.31568	-0.741484	-1.62176			M2	1.2446	1.67189	3.07749			C	0.200878	0.358014	0.418637
M3			8.13819	6.29797		M3		-0.945048	-1.9807			M3		1.92525	3.94683			M	0.844587	0.601624	0.760344
M4		6.83074	7.49495	6.68064		M4	-1.54929	-1.58829	-1.59802			M4	2.92673	3.00693	3.02728			S	0.638464	0.598894	2.63914
S1		7.21272	7.64116	6.06885		S1	-1.1673	-1.44207	-2.20981			S1	2.24592	2.71711	4.62615
S2		6.91301	8.47717	4.84699		S2	-1.46701	-0.606069	-3.43167			S2	2.76448	1.52211	10.7904
S3		6.56619	7.95212	5.67469		S3	-1.81383	-1.13112	-2.60397			S3	3.51576	2.19028	6.07958
S4				5.5233		S4			-2.75537			S4			6.75224

## Sheet: Figure 4A
string_interactions_short				https://string-db.org/
#node1	node2	node1_string_id	node2_string_id	neighborhood_on_chromosome	gene_fusion	phylogenetic_cooccurrence	homology	coexpression	experimentally_determined_interaction	database_annotated	automated_textmining	combined_score				node2
Abcg1	Il1b	10090.ENSMUSP00000024829	10090.ENSMUSP00000028881	0	0	0	0	0	0	0	0.468	0.468				Il1b
Abcg1	Vcam1	10090.ENSMUSP00000024829	10090.ENSMUSP00000029574	0	0	0	0	0.063	0	0	0.482	0.494				Vcam1
Abcg1	Cubn	10090.ENSMUSP00000024829	10090.ENSMUSP00000089009	0	0	0	0	0.061	0	0	0.508	0.518				Cubn
Abcg1	Tnf	10090.ENSMUSP00000024829	10090.ENSMUSP00000025263	0	0	0	0	0	0	0	0.528	0.528				Tnf
Ada	Tnf	10090.ENSMUSP00000017841	10090.ENSMUSP00000025263	0	0	0	0	0	0	0	0.465	0.465				Ccl3
Adam8	Ccl3	10090.ENSMUSP00000101684	10090.ENSMUSP00000001008	0	0	0	0	0.368	0	0	0.197	0.47				Trem2
Adam8	Trem2	10090.ENSMUSP00000101684	10090.ENSMUSP00000024791	0	0	0	0	0.382	0	0	0.146	0.449				Lpxn
Adam8	Lpxn	10090.ENSMUSP00000101684	10090.ENSMUSP00000025601	0	0	0	0	0.398	0	0	0.257	0.534				Slc15a3
Adam8	Slc15a3	10090.ENSMUSP00000101684	10090.ENSMUSP00000025646	0	0	0	0	0.406	0	0	0.055	0.415				Slc11a1
Adam8	Slc11a1	10090.ENSMUSP00000101684	10090.ENSMUSP00000027368	0	0	0	0	0.405	0	0	0	0.405				Clec4d
Adam8	Vcam1	10090.ENSMUSP00000101684	10090.ENSMUSP00000029574	0	0	0	0	0	0	0.36	0.24	0.492				Tyrobp
Adam8	Clec4d	10090.ENSMUSP00000101684	10090.ENSMUSP00000032240	0	0	0	0	0.439	0.044	0	0.145	0.501				Fcer1g
Adam8	Tyrobp	10090.ENSMUSP00000101684	10090.ENSMUSP00000032800	0	0	0	0	0.358	0	0	0.13	0.417				Ncf2
Adam8	Fcer1g	10090.ENSMUSP00000101684	10090.ENSMUSP00000078875	0	0	0	0	0.356	0	0	0.117	0.407				Rgs1
Adam8	Ncf2	10090.ENSMUSP00000101684	10090.ENSMUSP00000140404	0	0	0	0	0.373	0.049	0	0.088	0.408				Rab11fip4
Adam8	Rgs1	10090.ENSMUSP00000101684	10090.ENSMUSP00000140624	0	0	0	0	0.408	0	0	0.136	0.467				Rsad2
Adap2	Rab11fip4	10090.ENSMUSP00000021050	10090.ENSMUSP00000017783	0	0	0	0	0	0.049	0	0.639	0.642				Plek
Adap2	Rsad2	10090.ENSMUSP00000021050	10090.ENSMUSP00000020970	0	0	0	0	0.095	0	0	0.418	0.451				Gla
Adap2	Plek	10090.ENSMUSP00000021050	10090.ENSMUSP00000099945	0	0	0	0	0.107	0	0	0.365	0.409				Rbp2
Akr1b8	Gla	10090.ENSMUSP00000040244	10090.ENSMUSP00000033621	0	0	0	0	0	0	0.9	0.05	0.9				Akr1d1
Akr1c18	Rbp2	10090.ENSMUSP00000021635	10090.ENSMUSP00000140676	0	0	0	0	0	0.097	0.9	0.05	0.906				Ptn
Akr1c18	Akr1d1	10090.ENSMUSP00000021635	10090.ENSMUSP00000048830	0	0	0.449	0.955	0.061	0.385	0.9	0.439	0.939				Cyp4f18
Akr1d1	Ptn	10090.ENSMUSP00000048830	10090.ENSMUSP00000099073	0	0	0	0	0	0	0	0.509	0.509				Alox5ap
Alox12e	Cyp4f18	10090.ENSMUSP00000019051	10090.ENSMUSP00000003574	0	0	0	0	0	0	0.9	0.074	0.903				Cyp2b23
Alox12e	Alox5ap	10090.ENSMUSP00000019051	10090.ENSMUSP00000071130	0	0	0	0	0.064	0.228	0	0.378	0.511				Pla2g4d
Alox12e	Cyp2b23	10090.ENSMUSP00000019051	10090.ENSMUSP00000076578	0	0	0	0	0	0	0.65	0	0.65				Alox15
Alox12e	Pla2g4d	10090.ENSMUSP00000019051	10090.ENSMUSP00000092252	0	0	0	0	0	0.057	0.65	0	0.655				Ptgs2
Alox12e	Alox15	10090.ENSMUSP00000019051	10090.ENSMUSP00000019068	0	0	0.417	0.964	0.099	0	0.9	0.503	0.908				Il10
Alox12e	Ptgs2	10090.ENSMUSP00000019051	10090.ENSMUSP00000035065	0	0	0	0	0.061	0	0.9	0.31	0.929				Chil3
Alox15	Cyp4f18	10090.ENSMUSP00000019068	10090.ENSMUSP00000003574	0	0	0	0	0.061	0	0.9	0.262	0.924				Ptges
Alox15	Il10	10090.ENSMUSP00000019068	10090.ENSMUSP00000016673	0	0	0	0	0	0	0	0.464	0.463				Fpr3
Alox15	Chil3	10090.ENSMUSP00000019068	10090.ENSMUSP00000053923	0	0	0	0	0.06	0	0	0.411	0.422				Ccl6
Alox15	Ptges	10090.ENSMUSP00000019068	10090.ENSMUSP00000099916	0	0	0	0	0	0	0	0.452	0.452				Ly86
Alox15	Il1b	10090.ENSMUSP00000019068	10090.ENSMUSP00000028881	0	0	0	0	0.061	0	0	0.469	0.48				Ms4a6d
Alox15	Tnf	10090.ENSMUSP00000019068	10090.ENSMUSP00000025263	0	0	0	0	0.062	0	0	0.55	0.559				Oasl1
Alox15	Fpr3	10090.ENSMUSP00000019068	10090.ENSMUSP00000093316	0	0	0	0	0	0	0	0.59	0.59				Cd53
Alox15	Alox5ap	10090.ENSMUSP00000019068	10090.ENSMUSP00000071130	0	0	0	0	0.076	0.164	0	0.54	0.614				Igsf6
Alox15	Cyp2b23	10090.ENSMUSP00000019068	10090.ENSMUSP00000076578	0	0	0	0	0	0	0.65	0	0.65				Lcp2
Alox15	Pla2g4d	10090.ENSMUSP00000019068	10090.ENSMUSP00000092252	0	0	0	0	0	0.057	0.65	0.135	0.689				Cd14
Alox15	Ptgs2	10090.ENSMUSP00000019068	10090.ENSMUSP00000035065	0	0	0	0	0.061	0	0.9	0.591	0.958				Ms4a6c
Alox5ap	Ccl6	10090.ENSMUSP00000071130	10090.ENSMUSP00000019071	0	0	0	0	0.413	0	0	0	0.412				Srgn
Alox5ap	Ly86	10090.ENSMUSP00000071130	10090.ENSMUSP00000021860	0	0	0	0	0.465	0	0	0.084	0.489				Saa3
Alox5ap	Ms4a6d	10090.ENSMUSP00000071130	10090.ENSMUSP00000025582	0	0	0	0	0.412	0	0	0	0.412				Msr1
Alox5ap	Slc11a1	10090.ENSMUSP00000071130	10090.ENSMUSP00000027368	0	0	0	0	0.419	0	0	0.181	0.504				Hp
Alox5ap	Oasl1	10090.ENSMUSP00000071130	10090.ENSMUSP00000031540	0	0	0	0	0.096	0	0	0.447	0.478				Slfn4
Alox5ap	Clec4d	10090.ENSMUSP00000071130	10090.ENSMUSP00000032240	0	0	0	0	0.416	0	0	0.068	0.432				Cmpk2
Alox5ap	Tyrobp	10090.ENSMUSP00000071130	10090.ENSMUSP00000032800	0	0	0	0	0.778	0	0	0.096	0.791				Irf7
Alox5ap	Cd53	10090.ENSMUSP00000071130	10090.ENSMUSP00000035781	0	0	0	0	0.42	0	0	0.107	0.46				Ifi44
Alox5ap	Igsf6	10090.ENSMUSP00000071130	10090.ENSMUSP00000039059	0	0	0	0	0.469	0	0	0.212	0.564				Oasl2
Alox5ap	Lcp2	10090.ENSMUSP00000071130	10090.ENSMUSP00000056621	0	0	0	0	0.594	0	0	0	0.594				Oas2
Alox5ap	Cd14	10090.ENSMUSP00000071130	10090.ENSMUSP00000056669	0	0	0	0	0.416	0	0	0.144	0.479				Oas1g
Alox5ap	Ms4a6c	10090.ENSMUSP00000071130	10090.ENSMUSP00000132425	0	0	0	0	0.411	0	0	0	0.411				Trim30b
Alox5ap	Srgn	10090.ENSMUSP00000071130	10090.ENSMUSP00000125622	0	0	0	0	0.341	0	0	0.229	0.47				Ifit1
Alox5ap	Ncf2	10090.ENSMUSP00000071130	10090.ENSMUSP00000140404	0	0	0	0	0.473	0	0	0.071	0.49				Pydc4
Alox5ap	Ptges	10090.ENSMUSP00000071130	10090.ENSMUSP00000099916	0	0	0	0	0	0.131	0	0.465	0.515				Gm4070
Alox5ap	Fcer1g	10090.ENSMUSP00000071130	10090.ENSMUSP00000078875	0	0	0	0	0.451	0	0	0.156	0.517				Gm14446
Alox5ap	Plek	10090.ENSMUSP00000071130	10090.ENSMUSP00000099945	0	0	0	0	0.54	0	0	0	0.54				Atp6v1b1
Apoc2	Saa3	10090.ENSMUSP00000115173	10090.ENSMUSP00000006956	0	0	0	0	0	0	0.54	0.195	0.613				Cybb
Apoc2	Msr1	10090.ENSMUSP00000115173	10090.ENSMUSP00000026021	0	0	0	0	0.141	0	0.54	0.08	0.605				Stx11
Apol8	Hp	10090.ENSMUSP00000064237	10090.ENSMUSP00000074436	0	0	0	0	0	0	0.6	0.177	0.656				Nptx2
Apol9a	Slfn4	10090.ENSMUSP00000086875	10090.ENSMUSP00000000208	0	0	0	0	0.082	0	0	0.415	0.44				Ntrk3
Apol9a	Cmpk2	10090.ENSMUSP00000086875	10090.ENSMUSP00000020969	0	0	0	0	0.169	0	0	0.463	0.535				Cacna2d3
Apol9a	Rsad2	10090.ENSMUSP00000086875	10090.ENSMUSP00000020970	0	0	0	0	0.203	0	0	0.324	0.438				Gm21847
Apol9a	Irf7	10090.ENSMUSP00000086875	10090.ENSMUSP00000026571	0	0	0	0	0.419	0	0	0.147	0.484				Gpm6a
Apol9a	Ifi44	10090.ENSMUSP00000086875	10090.ENSMUSP00000029671	0	0	0	0	0.298	0	0	0.364	0.534				Ncan
Apol9a	Oasl2	10090.ENSMUSP00000086875	10090.ENSMUSP00000031542	0	0	0	0	0.279	0.068	0	0.361	0.533				Mmp13
Apol9a	Oas2	10090.ENSMUSP00000086875	10090.ENSMUSP00000060082	0	0	0	0	0.169	0	0	0.331	0.42				Mmp19
Apol9a	Hp	10090.ENSMUSP00000086875	10090.ENSMUSP00000074436	0	0	0	0	0.103	0	0.6	0.177	0.678				Mmp10
Apol9a	Oas1g	10090.ENSMUSP00000086875	10090.ENSMUSP00000083555	0	0	0	0	0.076	0.068	0	0.391	0.43				Cspg5
Apol9a	Trim30b	10090.ENSMUSP00000086875	10090.ENSMUSP00000102444	0	0	0	0	0	0	0	0.439	0.439				Fmod
Apol9a	Ifit1	10090.ENSMUSP00000086875	10090.ENSMUSP00000099888	0	0	0	0	0.329	0	0	0.259	0.481				Gfap
Apol9b	Slfn4	10090.ENSMUSP00000105397	10090.ENSMUSP00000000208	0	0	0	0	0.086	0	0	0.5	0.523				Tnc
Apol9b	Cmpk2	10090.ENSMUSP00000105397	10090.ENSMUSP00000020969	0	0	0	0	0.081	0	0	0.435	0.458				Pmaip1
Apol9b	Ifi44	10090.ENSMUSP00000105397	10090.ENSMUSP00000029671	0	0	0	0	0.264	0	0	0.293	0.457				Gprasp2
Apol9b	Oasl1	10090.ENSMUSP00000105397	10090.ENSMUSP00000031540	0	0	0	0	0.221	0.068	0	0.249	0.407				Ifitm3
Apol9b	Oasl2	10090.ENSMUSP00000105397	10090.ENSMUSP00000031542	0	0	0	0	0.121	0.068	0	0.38	0.447				Herc6
Apol9b	Oas2	10090.ENSMUSP00000105397	10090.ENSMUSP00000060082	0	0	0	0	0.224	0	0	0.262	0.402				Lgals3bp
Apol9b	Hp	10090.ENSMUSP00000105397	10090.ENSMUSP00000074436	0	0	0	0	0.112	0	0.6	0.177	0.682				Oas3
Apol9b	Pydc4	10090.ENSMUSP00000105397	10090.ENSMUSP00000095070	0	0	0	0	0	0	0	0.43	0.43				Ifi27l2a
Apol9b	Gm4070	10090.ENSMUSP00000105397	10090.ENSMUSP00000102377	0	0	0	0	0.071	0	0	0.383	0.402				Tlr7
Apol9b	Trim30b	10090.ENSMUSP00000105397	10090.ENSMUSP00000102444	0	0	0	0	0	0	0	0.529	0.529				Samhd1
Apol9b	Gm14446	10090.ENSMUSP00000105397	10090.ENSMUSP00000108086	0	0	0	0	0	0	0	0.464	0.463				Isg15
Aqp3	Atp6v1b1	10090.ENSMUSP00000055110	10090.ENSMUSP00000006431	0	0	0	0	0.062	0	0	0.534	0.544				Epgn
Aqp3	Cybb	10090.ENSMUSP00000055110	10090.ENSMUSP00000015484	0	0	0	0	0.063	0.048	0	0.852	0.857				Nrg1
Aqp3	Stx11	10090.ENSMUSP00000055110	10090.ENSMUSP00000046243	0	0	0	0	0.065	0.102	0.351	0.106	0.447				Gm10800
Arc	Nptx2	10090.ENSMUSP00000023268	10090.ENSMUSP00000071687	0	0	0	0	0.114	0	0	0.43	0.474				Gm10717
Arc	Ntrk3	10090.ENSMUSP00000023268	10090.ENSMUSP00000037909	0	0	0	0	0.064	0.047	0	0.464	0.48				Serpinb12
Arfgef3	Cacna2d3	10090.ENSMUSP00000019999	10090.ENSMUSP00000022567	0	0	0	0	0.079	0	0	0.387	0.411				Vsig4
Atp6v1b1	Gm21847	10090.ENSMUSP00000006431	10090.ENSMUSP00000136079	0	0	0	0	0	0	0	0.496	0.495				Nlrp3
B3gnt5	Gpm6a	10090.ENSMUSP00000078712	10090.ENSMUSP00000033915	0	0	0	0	0.048	0	0	0.405	0.409				Kcnd3
Bcan	Ncan	10090.ENSMUSP00000088491	10090.ENSMUSP00000002412	0	0	0	0.844	0.179	0.132	0.3	0.959	0.539				Tgm3
Bcan	Mmp13	10090.ENSMUSP00000088491	10090.ENSMUSP00000015394	0	0	0	0	0	0.13	0.9	0.24	0.928				Stfa3
Bcan	Mmp19	10090.ENSMUSP00000088491	10090.ENSMUSP00000026411	0	0	0	0	0	0.042	0.9	0.051	0.901				Rptn
Bcan	Mmp10	10090.ENSMUSP00000088491	10090.ENSMUSP00000034488	0	0	0	0	0	0.13	0.9	0.075	0.912				Slc7a11
Bcan	Cspg5	10090.ENSMUSP00000088491	10090.ENSMUSP00000035058	0	0	0	0	0.207	0	0.3	0.538	0.721				Clec4n
Bcan	Fmod	10090.ENSMUSP00000088491	10090.ENSMUSP00000035489	0	0	0	0	0	0.051	0.107	0.496	0.536				Lcn2
Bcan	Gfap	10090.ENSMUSP00000088491	10090.ENSMUSP00000064691	0	0	0	0	0.196	0	0	0.32	0.43				Havcr2
Bcan	Srgn	10090.ENSMUSP00000088491	10090.ENSMUSP00000125622	0	0	0	0	0.049	0	0	0.41	0.415				Osm
Bcan	Ptn	10090.ENSMUSP00000088491	10090.ENSMUSP00000099073	0	0	0	0	0.147	0.319	0	0.182	0.483				Serpinb3c
Bcan	Tnc	10090.ENSMUSP00000088491	10090.ENSMUSP00000102995	0	0	0	0	0	0.155	0.6	0.106	0.671				Serpinb6e
Bcl2l14	Pmaip1	10090.ENSMUSP00000107591	10090.ENSMUSP00000025399	0	0	0	0	0	0.068	0	0.399	0.415				Tlr8
Bex2	Gprasp2	10090.ENSMUSP00000043113	10090.ENSMUSP00000134666	0	0	0	0	0.186	0	0	0.293	0.4				Spp1
Bst2	Rsad2	10090.ENSMUSP00000051921	10090.ENSMUSP00000020970	0	0	0	0	0.471	0	0	0.597	0.778				Clec4e
Bst2	Ifitm3	10090.ENSMUSP00000051921	10090.ENSMUSP00000026565	0	0	0	0	0.399	0	0	0.42	0.637				Timp1
Bst2	Irf7	10090.ENSMUSP00000051921	10090.ENSMUSP00000026571	0	0	0	0	0.689	0	0	0.528	0.847				Cxcl3
Bst2	Ifi44	10090.ENSMUSP00000051921	10090.ENSMUSP00000029671	0	0	0	0	0.463	0	0	0.391	0.659				Irg1
Bst2	Oasl1	10090.ENSMUSP00000051921	10090.ENSMUSP00000031540	0	0	0	0	0.416	0	0	0.22	0.525				Csf3
Bst2	Oasl2	10090.ENSMUSP00000051921	10090.ENSMUSP00000031542	0	0	0	0	0.685	0	0	0.376	0.795				Cxcr2
Bst2	Herc6	10090.ENSMUSP00000051921	10090.ENSMUSP00000031817	0	0	0	0	0.241	0.052	0	0.406	0.536				Ccl4
Bst2	Clec4d	10090.ENSMUSP00000051921	10090.ENSMUSP00000032240	0	0	0	0	0.078	0	0	0.464	0.485				Cxcl2
Bst2	Lgals3bp	10090.ENSMUSP00000051921	10090.ENSMUSP00000035579	0	0	0	0	0.667	0	0	0.312	0.761				Ccr1
Bst2	Oas3	10090.ENSMUSP00000051921	10090.ENSMUSP00000035588	0	0	0	0	0.124	0	0	0.386	0.44				Samsn1
Bst2	Oas1g	10090.ENSMUSP00000051921	10090.ENSMUSP00000083555	0	0	0	0	0.231	0	0	0.273	0.417				Hcar2
Bst2	Ifi27l2a	10090.ENSMUSP00000051921	10090.ENSMUSP00000054698	0	0	0	0	0.486	0	0	0	0.485				Ear2
Bst2	Tlr7	10090.ENSMUSP00000051921	10090.ENSMUSP00000061853	0	0	0	0	0.07	0	0	0.533	0.547				Cd84
Bst2	Oas2	10090.ENSMUSP00000051921	10090.ENSMUSP00000060082	0	0	0	0	0.419	0	0	0.486	0.688				Edn3
Bst2	Ifit1	10090.ENSMUSP00000051921	10090.ENSMUSP00000099888	0	0	0	0	0.419	0	0	0.5	0.697				Nmu
Bst2	Samhd1	10090.ENSMUSP00000051921	10090.ENSMUSP00000059717	0	0	0	0	0.146	0	0	0.763	0.789				Ripk3
Bst2	Isg15	10090.ENSMUSP00000051921	10090.ENSMUSP00000082548	0	0	0	0	0.546	0	0	0.581	0.802				Siglec1
Btc	Epgn	10090.ENSMUSP00000112765	10090.ENSMUSP00000046987	0	0	0	0	0	0	0.3	0.698	0.779				Clec5a
Btc	Nrg1	10090.ENSMUSP00000112765	10090.ENSMUSP00000073546	0	0	0	0	0	0	0	0.509	0.509				Milr1
C130026I21Rik	Gm10800	10090.ENSMUSP00000091224	10090.ENSMUSP00000097275	0	0	0	0	0	0	0	0.614	0.614				Gm15448
C130026I21Rik	Gm10717	10090.ENSMUSP00000091224	10090.ENSMUSP00000096644	0	0	0	0	0	0	0	0.666	0.666				Ms4a6b
C2	Serpinb12	10090.ENSMUSP00000025230	10090.ENSMUSP00000080030	0	0	0	0	0	0.11	0.129	0.291	0.402				Fgfr4
C5ar1	Il10	10090.ENSMUSP00000129972	10090.ENSMUSP00000016673	0	0	0	0	0.08	0	0	0.381	0.407				Krt19
C5ar1	Trem2	10090.ENSMUSP00000129972	10090.ENSMUSP00000024791	0	0	0	0	0.276	0	0	0.284	0.459				Frmd3
C5ar1	Tnf	10090.ENSMUSP00000129972	10090.ENSMUSP00000025263	0	0	0	0	0.141	0	0	0.507	0.558				S100a9
C5ar1	Il1b	10090.ENSMUSP00000129972	10090.ENSMUSP00000028881	0	0	0	0	0.171	0	0	0.473	0.545				S100a8
C5ar1	Vcam1	10090.ENSMUSP00000129972	10090.ENSMUSP00000029574	0	0	0	0	0.433	0	0	0.213	0.535				Sirpb1c
C5ar1	Tyrobp	10090.ENSMUSP00000129972	10090.ENSMUSP00000032800	0	0	0	0	0.257	0	0	0.248	0.418				Gm9733
C5ar1	Igsf6	10090.ENSMUSP00000129972	10090.ENSMUSP00000039059	0	0	0	0	0.508	0	0	0.186	0.583				Fam57b
C5ar1	Vsig4	10090.ENSMUSP00000129972	10090.ENSMUSP00000051521	0	0	0	0	0.158	0	0	0.448	0.515				Ms4a7
C5ar1	Lcp2	10090.ENSMUSP00000129972	10090.ENSMUSP00000056621	0	0	0	0	0.462	0	0	0.105	0.499				Trem3
C5ar1	Tlr7	10090.ENSMUSP00000129972	10090.ENSMUSP00000061853	0	0	0	0	0.407	0	0	0.213	0.514				Sirpb1a
C5ar1	Fcer1g	10090.ENSMUSP00000129972	10090.ENSMUSP00000078875	0	0	0	0	0.243	0	0	0.245	0.404				Upp1
C5ar1	Nlrp3	10090.ENSMUSP00000129972	10090.ENSMUSP00000098707	0	0	0	0	0.171	0	0	0.364	0.45				Oas1a
C5ar1	Plek	10090.ENSMUSP00000129972	10090.ENSMUSP00000099945	0	0	0	0	0.518	0	0	0.051	0.523				Samd9l
Cacna1g	Cacna2d3	10090.ENSMUSP00000098127	10090.ENSMUSP00000022567	0	0	0	0	0.161	0.19	0	0.373	0.537				Epsti1
Cacna1g	Kcnd3	10090.ENSMUSP00000098127	10090.ENSMUSP00000096357	0	0	0	0	0.151	0.071	0	0.582	0.642				Tcf23
Casp14	Tnf	10090.ENSMUSP00000005488	10090.ENSMUSP00000025263	0	0	0	0	0	0.059	0.304	0.199	0.429				Serpinb3a
Casp14	Tgm3	10090.ENSMUSP00000005488	10090.ENSMUSP00000105928	0	0	0	0	0.102	0	0	0.391	0.429				Lce3c
Casp14	Il1b	10090.ENSMUSP00000005488	10090.ENSMUSP00000028881	0	0	0	0	0	0.102	0.298	0.199	0.451				Sprr1b
Casp14	Stfa3	10090.ENSMUSP00000005488	10090.ENSMUSP00000067445	0	0	0	0	0.061	0	0.9	0.049	0.902				Spink7
Casp14	Rptn	10090.ENSMUSP00000005488	10090.ENSMUSP00000044998	0	0	0	0	0.109	0	0.9	0.432	0.945				Lce3e
Cbs	Tnf	10090.ENSMUSP00000066878	10090.ENSMUSP00000025263	0	0	0	0	0	0	0	0.403	0.403				Lce3d
Cbs	Slc7a11	10090.ENSMUSP00000066878	10090.ENSMUSP00000029297	0	0	0	0	0.062	0	0	0.45	0.462				Col1a1
Ccl3	Lcp2	10090.ENSMUSP00000001008	10090.ENSMUSP00000056621	0	0	0	0	0.305	0	0	0.172	0.4				Col1a2
Ccl3	Gfap	10090.ENSMUSP00000001008	10090.ENSMUSP00000064691	0	0	0	0	0	0	0	0.404	0.404				Pdgfrl
Ccl3	Clec4n	10090.ENSMUSP00000001008	10090.ENSMUSP00000024118	0	0	0	0	0.201	0	0	0.294	0.412				Col4a6
Ccl3	Lcn2	10090.ENSMUSP00000001008	10090.ENSMUSP00000053962	0	0	0	0	0.086	0	0	0.392	0.42				Fbxo32
Ccl3	Havcr2	10090.ENSMUSP00000001008	10090.ENSMUSP00000020668	0	0	0	0	0.138	0	0	0.387	0.449				Thbs1
Ccl3	Osm	10090.ENSMUSP00000001008	10090.ENSMUSP00000074708	0	0	0	0	0.206	0	0	0.336	0.45				Tnmd
Ccl3	Cybb	10090.ENSMUSP00000001008	10090.ENSMUSP00000015484	0	0	0	0	0.219	0	0	0.34	0.462				Ier3
Ccl3	Saa3	10090.ENSMUSP00000001008	10090.ENSMUSP00000006956	0	0	0	0	0.143	0	0	0.402	0.466				Il1f6
Ccl3	Trem2	10090.ENSMUSP00000001008	10090.ENSMUSP00000024791	0	0	0	0	0.218	0	0	0.353	0.472				Gnao1
Ccl3	Slc11a1	10090.ENSMUSP00000001008	10090.ENSMUSP00000027368	0	0	0	0	0.377	0	0	0.198	0.478				Glrx
Ccl3	Plek	10090.ENSMUSP00000001008	10090.ENSMUSP00000099945	0	0	0	0	0.449	0	0	0.108	0.488				Ncf1
Ccl3	Tyrobp	10090.ENSMUSP00000001008	10090.ENSMUSP00000032800	0	0	0	0	0.239	0	0	0.357	0.49				Gsta4
Ccl3	Irf7	10090.ENSMUSP00000001008	10090.ENSMUSP00000026571	0	0	0	0	0.09	0	0	0.464	0.491				Gsta1
Ccl3	Msr1	10090.ENSMUSP00000001008	10090.ENSMUSP00000026021	0	0	0	0	0.335	0	0	0.273	0.495				Gm11710
Ccl3	Chil3	10090.ENSMUSP00000001008	10090.ENSMUSP00000053923	0	0	0	0	0.114	0	0	0.464	0.504				Pmel
Ccl3	Clec4d	10090.ENSMUSP00000001008	10090.ENSMUSP00000032240	0	0	0	0	0.416	0	0	0.197	0.51				Ugt8a
Ccl3	Slc15a3	10090.ENSMUSP00000001008	10090.ENSMUSP00000025646	0	0	0	0	0.497	0	0	0.069	0.512				Stra6
Ccl3	Serpinb3c	10090.ENSMUSP00000001008	10090.ENSMUSP00000027565	0	0	0	0	0	0	0	0.528	0.528				Shc3
Ccl3	Serpinb6e	10090.ENSMUSP00000001008	10090.ENSMUSP00000105904	0	0	0	0	0	0	0	0.528	0.528				Snap91
Ccl3	Tlr8	10090.ENSMUSP00000001008	10090.ENSMUSP00000107793	0	0	0	0	0.125	0	0	0.489	0.534				Snrpn
Ccl3	Spp1	10090.ENSMUSP00000001008	10090.ENSMUSP00000108367	0	0	0	0	0.173	0	0	0.465	0.538				Wnt10b
Ccl3	Rgs1	10090.ENSMUSP00000001008	10090.ENSMUSP00000140624	0	0	0	0	0.424	0	0	0.239	0.543				Krt75
Ccl3	Fcer1g	10090.ENSMUSP00000001008	10090.ENSMUSP00000078875	0	0	0	0	0.362	0	0	0.33	0.554				Sprr2h
Ccl3	Mmp13	10090.ENSMUSP00000001008	10090.ENSMUSP00000015394	0	0	0	0	0.132	0	0	0.536	0.58				Sp100
Ccl3	Nlrp3	10090.ENSMUSP00000001008	10090.ENSMUSP00000098707	0	0	0	0	0.187	0	0	0.517	0.59				Pyhin1
Ccl3	Clec4e	10090.ENSMUSP00000001008	10090.ENSMUSP00000032239	0	0	0	0	0.418	0	0	0.329	0.592				Gjb2
Ccl3	Ptgs2	10090.ENSMUSP00000001008	10090.ENSMUSP00000035065	0	0	0	0	0.132	0	0	0.552	0.594				Pls1
Ccl3	Timp1	10090.ENSMUSP00000001008	10090.ENSMUSP00000009530	0	0	0	0	0.162	0	0	0.554	0.61				Gm5414
Ccl3	Vcam1	10090.ENSMUSP00000001008	10090.ENSMUSP00000029574	0	0	0	0	0.071	0	0	0.635	0.646				Ly9
Ccl3	Cxcl3	10090.ENSMUSP00000001008	10090.ENSMUSP00000031326	0	0	0	0	0.152	0	0	0.62	0.664				Plaur
Ccl3	Tlr7	10090.ENSMUSP00000001008	10090.ENSMUSP00000061853	0	0	0	0	0.203	0	0	0.611	0.676				Frem2
Ccl3	Cd14	10090.ENSMUSP00000001008	10090.ENSMUSP00000056669	0	0	0	0	0.415	0	0	0.527	0.711				Glt8d2
Ccl3	Irg1	10090.ENSMUSP00000001008	10090.ENSMUSP00000022722	0	0	0	0	0.599	0	0	0.315	0.713				Ncald
Ccl3	Csf3	10090.ENSMUSP00000001008	10090.ENSMUSP00000037762	0	0	0	0	0.073	0	0	0.842	0.847				Wnt7a
Ccl3	Srgn	10090.ENSMUSP00000001008	10090.ENSMUSP00000125622	0	0	0	0	0.182	0.081	0	0.816	0.85				Slc13a3
Ccl3	Il10	10090.ENSMUSP00000001008	10090.ENSMUSP00000016673	0	0	0	0	0.133	0	0	0.846	0.86				Slc37a2
Ccl3	Cxcr2	10090.ENSMUSP00000001008	10090.ENSMUSP00000102512	0	0	0	0	0.062	0.084	0.6	0.744	0.9				Gabrp
Ccl3	Ccl4	10090.ENSMUSP00000001008	10090.ENSMUSP00000019074	0	0	0	0.956	0.91	0.09	0	0.919	0.918				Gcnt1
Ccl3	Cxcl2	10090.ENSMUSP00000001008	10090.ENSMUSP00000074885	0	0	0	0	0.569	0	0	0.843	0.929				Slc6a11
Ccl3	Tnf	10090.ENSMUSP00000001008	10090.ENSMUSP00000025263	0	0	0	0	0.425	0	0	0.891	0.934				Slc6a1
Ccl3	Il1b	10090.ENSMUSP00000001008	10090.ENSMUSP00000028881	0	0	0	0	0.667	0	0	0.848	0.947				Gjb6
Ccl3	Ccr1	10090.ENSMUSP00000001008	10090.ENSMUSP00000026911	0	0	0	0	0.193	0.202	0.8	0.989	0.998				Gjc3
Ccl4	Timp1	10090.ENSMUSP00000019074	10090.ENSMUSP00000009530	0	0	0	0	0.144	0	0	0.529	0.579				Hepacam
Ccl4	Mmp13	10090.ENSMUSP00000019074	10090.ENSMUSP00000015394	0	0	0	0	0.114	0.047	0	0.363	0.415				Tmem37
Ccl4	Il10	10090.ENSMUSP00000019074	10090.ENSMUSP00000016673	0	0	0	0	0.152	0	0	0.842	0.86				Treml4
Ccl4	Rsad2	10090.ENSMUSP00000019074	10090.ENSMUSP00000020970	0	0	0	0	0.204	0	0	0.293	0.413				Krt84
Ccl4	Samsn1	10090.ENSMUSP00000019074	10090.ENSMUSP00000109877	0	0	0	0	0.408	0	0	0.049	0.413				Krt4
Ccl4	Isg15	10090.ENSMUSP00000019074	10090.ENSMUSP00000082548	0	0	0	0	0.152	0	0	0.35	0.425				Krt77
Ccl4	Oas2	10090.ENSMUSP00000019074	10090.ENSMUSP00000060082	0	0	0	0	0.206	0	0	0.308	0.427				Krt32
Ccl4	Spp1	10090.ENSMUSP00000019074	10090.ENSMUSP00000108367	0	0	0	0	0.09	0	0	0.399	0.429				Krt15
Ccl4	Slc15a3	10090.ENSMUSP00000019074	10090.ENSMUSP00000025646	0	0	0	0	0.419	0	0	0.093	0.45				Retnlg
Ccl4	Havcr2	10090.ENSMUSP00000019074	10090.ENSMUSP00000020668	0	0	0	0	0.137	0	0	0.399	0.459				Hepacam2
Ccl4	Clec4d	10090.ENSMUSP00000019074	10090.ENSMUSP00000032240	0	0	0	0	0.417	0	0	0.115	0.462				Rgs9
Ccl4	Ifit1	10090.ENSMUSP00000019074	10090.ENSMUSP00000099888	0	0	0	0	0.165	0	0	0.399	0.477				Rgs11
Ccl4	Hcar2	10090.ENSMUSP00000019074	10090.ENSMUSP00000054104	0	0	0	0	0.321	0.093	0.188	0.08	0.478				P2ry14
Ccl4	Plek	10090.ENSMUSP00000019074	10090.ENSMUSP00000099945	0	0	0	0	0.478	0	0	0.079	0.498				Slpi
Ccl4	Osm	10090.ENSMUSP00000019074	10090.ENSMUSP00000074708	0	0	0	0	0.279	0	0	0.336	0.5				Lgmn
Ccl4	Nlrp3	10090.ENSMUSP00000019074	10090.ENSMUSP00000098707	0	0	0	0	0.205	0	0	0.399	0.502				Slc5a8
Ccl4	Tyrobp	10090.ENSMUSP00000019074	10090.ENSMUSP00000032800	0	0	0	0	0.315	0	0	0.306	0.504				Mlc1
Ccl4	Ptgs2	10090.ENSMUSP00000019074	10090.ENSMUSP00000035065	0	0	0	0	0.113	0	0	0.467	0.507				Xaf1
Ccl4	Lcp2	10090.ENSMUSP00000019074	10090.ENSMUSP00000056621	0	0	0	0	0.475	0	0	0.123	0.52				Serpina3n
Ccl4	Fcer1g	10090.ENSMUSP00000019074	10090.ENSMUSP00000078875	0	0	0	0	0.409	0	0	0.223	0.521				Serpina3b
Ccl4	Oasl1	10090.ENSMUSP00000019074	10090.ENSMUSP00000031540	0	0	0	0	0.419	0	0	0.209	0.521				Tfec
Ccl4	Serpinb6e	10090.ENSMUSP00000019074	10090.ENSMUSP00000105904	0	0	0	0	0	0	0.24	0.397	0.522				Il1f8
Ccl4	Serpinb3c	10090.ENSMUSP00000019074	10090.ENSMUSP00000027565	0	0	0	0	0	0	0.24	0.397	0.522				Stat4
Ccl4	Tlr8	10090.ENSMUSP00000019074	10090.ENSMUSP00000107793	0	0	0	0	0.148	0	0	0.464	0.524				Sprr2d
Ccl4	Clec4e	10090.ENSMUSP00000019074	10090.ENSMUSP00000032239	0	0	0	0	0.421	0	0	0.247	0.545				Sh2d3c
Ccl4	Irf7	10090.ENSMUSP00000019074	10090.ENSMUSP00000026571	0	0	0	0	0.212	0	0	0.464	0.559				Lce3f
Ccl4	Rgs1	10090.ENSMUSP00000019074	10090.ENSMUSP00000140624	0	0	0	0	0.496	0	0	0.198	0.578				Krt6b
Ccl4	Vcam1	10090.ENSMUSP00000019074	10090.ENSMUSP00000029574	0	0	0	0	0.152	0	0	0.552	0.603				Lgr6
Ccl4	Fpr3	10090.ENSMUSP00000019074	10090.ENSMUSP00000093316	0	0	0	0	0.051	0.093	0.495	0.248	0.629				Slc5a1
Ccl4	Tlr7	10090.ENSMUSP00000019074	10090.ENSMUSP00000061853	0	0	0	0	0.265	0	0	0.552	0.656				Sprr2e
Ccl4	Cd14	10090.ENSMUSP00000019074	10090.ENSMUSP00000056669	0	0	0	0	0.42	0	0	0.468	0.678				Skint4
Ccl4	Csf3	10090.ENSMUSP00000019074	10090.ENSMUSP00000037762	0	0	0	0	0.099	0	0	0.841	0.85				Pinlyp
Ccl4	Cxcr2	10090.ENSMUSP00000019074	10090.ENSMUSP00000102512	0	0	0	0	0.062	0.093	0.661	0.616	0.874				Stfa2
Ccl4	Irg1	10090.ENSMUSP00000019074	10090.ENSMUSP00000022722	0	0	0	0	0.851	0	0	0.299	0.891				Stfa2l1
Ccl4	Cxcl3	10090.ENSMUSP00000019074	10090.ENSMUSP00000031326	0	0	0	0	0.127	0.065	0.741	0.595	0.903				Paqr7
Ccl4	Tnf	10090.ENSMUSP00000019074	10090.ENSMUSP00000025263	0	0	0	0	0.679	0	0	0.845	0.948				Plac8
Ccl4	Il1b	10090.ENSMUSP00000019074	10090.ENSMUSP00000028881	0	0	0	0	0.724	0	0	0.843	0.954				Notum
Ccl4	Cxcl2	10090.ENSMUSP00000019074	10090.ENSMUSP00000074885	0	0	0	0	0.425	0.065	0.741	0.809	0.969				Slc15a2
Ccl4	Ccr1	10090.ENSMUSP00000019074	10090.ENSMUSP00000026911	0	0	0	0	0.178	0.239	0.792	0.965	0.994				Slc2a3
Ccl6	Cybb	10090.ENSMUSP00000019071	10090.ENSMUSP00000015484	0	0	0	0	0.411	0	0	0.06	0.423				Sdf2l1
Ccl6	Ear2	10090.ENSMUSP00000019071	10090.ENSMUSP00000074386	0	0	0	0	0.402	0	0	0.056	0.411				Slc7a8
Ccl6	Cd84	10090.ENSMUSP00000019071	10090.ENSMUSP00000120881	0	0	0	0	0.274	0	0	0.24	0.424				Trim2
Ccl6	Tnf	10090.ENSMUSP00000019071	10090.ENSMUSP00000025263	0	0	0	0	0.162	0	0	0.354	0.435				Wfdc12
Ccl6	Ms4a6c	10090.ENSMUSP00000019071	10090.ENSMUSP00000132425	0	0	0	0	0.356	0	0	0.165	0.439				Zcchc12
Ccl6	Clec4d	10090.ENSMUSP00000019071	10090.ENSMUSP00000032240	0	0	0	0	0.225	0	0	0.308	0.44				Vipr1
Ccl6	Igsf6	10090.ENSMUSP00000019071	10090.ENSMUSP00000039059	0	0	0	0	0.413	0	0	0.113	0.457				Wfdc18
Ccl6	Cxcl3	10090.ENSMUSP00000019071	10090.ENSMUSP00000031326	0	0	0	0	0.069	0	0	0.464	0.479
Ccl6	Il1b	10090.ENSMUSP00000019071	10090.ENSMUSP00000028881	0	0	0	0	0.221	0	0	0.363	0.482
Ccl6	Edn3	10090.ENSMUSP00000019071	10090.ENSMUSP00000029030	0	0	0	0	0	0	0.5	0	0.499
Ccl6	Nmu	10090.ENSMUSP00000019071	10090.ENSMUSP00000031146	0	0	0	0	0	0	0.5	0	0.499
Ccl6	Ly86	10090.ENSMUSP00000019071	10090.ENSMUSP00000021860	0	0	0	0	0.407	0	0	0.196	0.503
Ccl6	Ms4a6d	10090.ENSMUSP00000019071	10090.ENSMUSP00000025582	0	0	0	0	0.439	0	0	0.177	0.519
Ccl6	Cxcl2	10090.ENSMUSP00000019071	10090.ENSMUSP00000074885	0	0	0	0	0.162	0	0	0.468	0.535
Ccl6	Clec4n	10090.ENSMUSP00000019071	10090.ENSMUSP00000024118	0	0	0	0	0.59	0	0	0.149	0.636
Ccl6	Fpr3	10090.ENSMUSP00000019071	10090.ENSMUSP00000093316	0	0	0	0	0	0.057	0.6	0.121	0.639
Ccl6	Tyrobp	10090.ENSMUSP00000019071	10090.ENSMUSP00000032800	0	0	0	0	0.638	0	0	0.134	0.673
Ccl6	Cxcr2	10090.ENSMUSP00000019071	10090.ENSMUSP00000102512	0	0	0	0	0.061	0.057	0.6	0.419	0.766
Ccl6	Ccr1	10090.ENSMUSP00000019071	10090.ENSMUSP00000026911	0	0	0	0	0.203	0.157	0.8	0.644	0.945
Ccr1	Cybb	10090.ENSMUSP00000026911	10090.ENSMUSP00000015484	0	0	0	0	0.274	0.045	0	0.213	0.407
Ccr1	Il10	10090.ENSMUSP00000026911	10090.ENSMUSP00000016673	0	0	0	0	0.078	0	0	0.6	0.615
Ccr1	Tnf	10090.ENSMUSP00000026911	10090.ENSMUSP00000025263	0	0	0	0	0.168	0	0	0.64	0.688
Ccr1	Lcp2	10090.ENSMUSP00000026911	10090.ENSMUSP00000056621	0	0	0	0	0.239	0	0	0.324	0.464
Ccr1	Cd14	10090.ENSMUSP00000026911	10090.ENSMUSP00000056669	0	0	0	0	0.22	0	0	0.38	0.495
Ccr1	Tlr7	10090.ENSMUSP00000026911	10090.ENSMUSP00000061853	0	0	0	0	0.258	0.057	0	0.381	0.529
Ccr1	Vcam1	10090.ENSMUSP00000026911	10090.ENSMUSP00000029574	0	0	0	0	0.131	0	0	0.494	0.542
Ccr1	Fpr3	10090.ENSMUSP00000026911	10090.ENSMUSP00000093316	0	0	0	0.668	0.052	0	0.479	0.366	0.542
Ccr1	Il1b	10090.ENSMUSP00000026911	10090.ENSMUSP00000028881	0	0	0	0	0.199	0.046	0	0.605	0.673
Ccr1	Cxcl3	10090.ENSMUSP00000026911	10090.ENSMUSP00000031326	0	0	0	0	0.096	0.087	0.642	0.493	0.83
Ccr1	Cxcl2	10090.ENSMUSP00000026911	10090.ENSMUSP00000074885	0	0	0	0	0.184	0.087	0.642	0.615	0.883
Cd101	Lcp2	10090.ENSMUSP00000116643	10090.ENSMUSP00000056621	0	0	0	0	0.088	0	0.9	0	0.904
Cd14	Saa3	10090.ENSMUSP00000056669	10090.ENSMUSP00000006956	0	0	0	0	0.274	0	0	0.248	0.43
Cd14	Timp1	10090.ENSMUSP00000056669	10090.ENSMUSP00000009530	0	0	0	0	0.238	0	0	0.309	0.451
Cd14	Cybb	10090.ENSMUSP00000056669	10090.ENSMUSP00000015484	0	0	0	0	0.271	0	0	0.276	0.449
Cd14	Il10	10090.ENSMUSP00000056669	10090.ENSMUSP00000016673	0	0	0	0	0.086	0	0	0.715	0.728
Cd14	Ly86	10090.ENSMUSP00000056669	10090.ENSMUSP00000021860	0	0	0	0	0.201	0	0.9	0.395	0.947
Cd14	Ripk3	10090.ENSMUSP00000056669	10090.ENSMUSP00000022830	0	0	0	0	0.117	0	0.659	0.084	0.7
Cd14	Clec4n	10090.ENSMUSP00000056669	10090.ENSMUSP00000024118	0	0	0	0	0.375	0	0.216	0.231	0.59
Cd14	Trem2	10090.ENSMUSP00000056669	10090.ENSMUSP00000024791	0	0	0	0	0.224	0	0	0.383	0.501
Cd14	Tnf	10090.ENSMUSP00000056669	10090.ENSMUSP00000025263	0	0	0	0	0.214	0	0	0.779	0.818
Cd14	Ms4a6d	10090.ENSMUSP00000056669	10090.ENSMUSP00000025582	0	0	0	0	0.551	0	0	0.045	0.553
Cd14	Slc15a3	10090.ENSMUSP00000056669	10090.ENSMUSP00000025646	0	0	0	0	0.455	0	0	0.065	0.468
Cd14	Msr1	10090.ENSMUSP00000056669	10090.ENSMUSP00000026021	0	0	0	0	0.334	0	0	0.356	0.552
Cd14	Irf7	10090.ENSMUSP00000056669	10090.ENSMUSP00000026571	0	0	0	0	0.13	0	0.6	0.294	0.732
Cd14	Slc11a1	10090.ENSMUSP00000056669	10090.ENSMUSP00000027368	0	0	0	0	0.418	0	0	0.22	0.526
Cd14	Serpinb3c	10090.ENSMUSP00000056669	10090.ENSMUSP00000027565	0	0	0	0	0	0	0	0.52	0.52
Cd14	Siglec1	10090.ENSMUSP00000056669	10090.ENSMUSP00000028794	0	0	0	0	0.166	0	0	0.398	0.476
Cd14	Il1b	10090.ENSMUSP00000056669	10090.ENSMUSP00000028881	0	0	0	0	0.418	0	0	0.715	0.827
Cd14	Vcam1	10090.ENSMUSP00000056669	10090.ENSMUSP00000029574	0	0	0	0	0.125	0	0	0.551	0.59
Cd14	Clec4e	10090.ENSMUSP00000056669	10090.ENSMUSP00000032239	0	0	0	0	0.273	0	0.216	0.273	0.549
Cd14	Clec4d	10090.ENSMUSP00000056669	10090.ENSMUSP00000032240	0	0	0	0	0.449	0	0.216	0.197	0.623
Cd14	Tyrobp	10090.ENSMUSP00000056669	10090.ENSMUSP00000032800	0	0	0	0	0.673	0	0	0.292	0.758
Cd14	Ptgs2	10090.ENSMUSP00000056669	10090.ENSMUSP00000035065	0	0	0	0	0.113	0	0	0.431	0.473
Cd14	Csf3	10090.ENSMUSP00000056669	10090.ENSMUSP00000037762	0	0	0	0	0.069	0	0	0.495	0.509
Cd14	Igsf6	10090.ENSMUSP00000056669	10090.ENSMUSP00000039059	0	0	0	0	0.417	0	0	0.125	0.468
Cd14	Chil3	10090.ENSMUSP00000056669	10090.ENSMUSP00000053923	0	0	0	0	0.131	0	0	0.399	0.455
Cd14	Lcn2	10090.ENSMUSP00000056669	10090.ENSMUSP00000053962	0	0	0	0	0.39	0	0	0.235	0.513
Cd14	Plek	10090.ENSMUSP00000056669	10090.ENSMUSP00000099945	0	0	0	0	0.417	0	0	0.053	0.424
Cd14	Spp1	10090.ENSMUSP00000056669	10090.ENSMUSP00000108367	0	0	0	0	0.187	0	0	0.321	0.424
Cd14	Nlrp3	10090.ENSMUSP00000056669	10090.ENSMUSP00000098707	0	0	0	0	0.189	0	0	0.394	0.487
Cd14	Serpinb6e	10090.ENSMUSP00000056669	10090.ENSMUSP00000105904	0	0	0	0	0	0	0	0.52	0.52
Cd14	Clec5a	10090.ENSMUSP00000056669	10090.ENSMUSP00000121848	0	0	0	0	0.237	0	0.216	0.307	0.549
Cd14	Cxcl2	10090.ENSMUSP00000056669	10090.ENSMUSP00000074885	0	0	0	0	0.408	0	0	0.464	0.669
Cd14	Tlr8	10090.ENSMUSP00000056669	10090.ENSMUSP00000107793	0	0	0	0	0.211	0.071	0.35	0.465	0.711
Cd14	Fcer1g	10090.ENSMUSP00000056669	10090.ENSMUSP00000078875	0	0	0	0	0.534	0	0	0.404	0.711
Cd14	Tlr7	10090.ENSMUSP00000056669	10090.ENSMUSP00000061853	0	0	0	0	0.18	0.071	0.35	0.55	0.747
Cd300a	Trem2	10090.ENSMUSP00000102192	10090.ENSMUSP00000024791	0	0	0	0	0.145	0	0	0.374	0.442
Cd300a	Slc11a1	10090.ENSMUSP00000102192	10090.ENSMUSP00000027368	0	0	0	0	0.411	0	0	0	0.411
Cd300a	Tyrobp	10090.ENSMUSP00000102192	10090.ENSMUSP00000032800	0	0	0	0	0.373	0	0	0.482	0.661
Cd300a	Igsf6	10090.ENSMUSP00000102192	10090.ENSMUSP00000039059	0	0	0	0	0.418	0	0	0.074	0.438
Cd300a	Fcer1g	10090.ENSMUSP00000102192	10090.ENSMUSP00000078875	0	0	0	0	0.276	0	0	0.399	0.546
Cd300a	Milr1	10090.ENSMUSP00000102192	10090.ENSMUSP00000083538	0	0	0	0	0.113	0	0	0.413	0.457
Cd300a	Cd84	10090.ENSMUSP00000102192	10090.ENSMUSP00000120881	0	0	0	0	0.37	0	0	0.269	0.52
Cd300ld	Tyrobp	10090.ENSMUSP00000047022	10090.ENSMUSP00000032800	0	0	0	0	0.2	0	0	0.297	0.413
Cd300ld	Gm15448	10090.ENSMUSP00000047022	10090.ENSMUSP00000104259	0	0	0	0	0.114	0	0	0.358	0.407
Cd300ld	Fcer1g	10090.ENSMUSP00000047022	10090.ENSMUSP00000078875	0	0	0	0	0.178	0	0	0.697	0.74
Cd53	Cybb	10090.ENSMUSP00000035781	10090.ENSMUSP00000015484	0	0	0	0	0.568	0.058	0	0.155	0.626
Cd53	Havcr2	10090.ENSMUSP00000035781	10090.ENSMUSP00000020668	0	0	0	0	0.403	0.05	0	0	0.408
Cd53	Ly86	10090.ENSMUSP00000035781	10090.ENSMUSP00000021860	0	0	0	0	0.638	0	0	0.322	0.744
Cd53	Clec4n	10090.ENSMUSP00000035781	10090.ENSMUSP00000024118	0	0	0	0	0.418	0.043	0	0	0.419
Cd53	Ms4a6d	10090.ENSMUSP00000035781	10090.ENSMUSP00000025582	0	0	0	0	0.609	0	0	0.213	0.679
Cd53	Lpxn	10090.ENSMUSP00000035781	10090.ENSMUSP00000025601	0	0	0	0	0.551	0	0	0.109	0.583
Cd53	Slc15a3	10090.ENSMUSP00000035781	10090.ENSMUSP00000025646	0	0	0	0	0.419	0	0	0	0.419
Cd53	Slc11a1	10090.ENSMUSP00000035781	10090.ENSMUSP00000027368	0	0	0	0	0.406	0	0	0.114	0.451
Cd53	Clec4d	10090.ENSMUSP00000035781	10090.ENSMUSP00000032240	0	0	0	0	0.401	0.043	0	0.059	0.413
Cd53	Tyrobp	10090.ENSMUSP00000035781	10090.ENSMUSP00000032800	0	0	0	0	0.744	0	0	0.218	0.791
Cd53	Tlr7	10090.ENSMUSP00000035781	10090.ENSMUSP00000061853	0	0	0	0	0.348	0.049	0	0.109	0.4
Cd53	Igsf6	10090.ENSMUSP00000035781	10090.ENSMUSP00000039059	0	0	0	0	0.423	0	0	0	0.423
Cd53	Ms4a6c	10090.ENSMUSP00000035781	10090.ENSMUSP00000132425	0	0	0	0	0.423	0	0	0.057	0.433
Cd53	Samsn1	10090.ENSMUSP00000035781	10090.ENSMUSP00000109877	0	0	0	0	0.454	0	0	0	0.454
Cd53	Ncf2	10090.ENSMUSP00000035781	10090.ENSMUSP00000140404	0	0	0	0	0.419	0	0	0.129	0.473
Cd53	Cd84	10090.ENSMUSP00000035781	10090.ENSMUSP00000120881	0	0	0	0	0.413	0	0	0.227	0.527
Cd53	Rgs1	10090.ENSMUSP00000035781	10090.ENSMUSP00000140624	0	0	0	0	0.465	0	0	0.178	0.541
Cd53	Fcer1g	10090.ENSMUSP00000035781	10090.ENSMUSP00000078875	0	0	0	0	0.447	0	0	0.299	0.596
Cd53	Ms4a6b	10090.ENSMUSP00000035781	10090.ENSMUSP00000124685	0	0	0	0	0.608	0	0	0.059	0.615
Cd53	Plek	10090.ENSMUSP00000035781	10090.ENSMUSP00000099945	0	0	0	0	0.63	0	0	0.061	0.638
Cd53	Lcp2	10090.ENSMUSP00000035781	10090.ENSMUSP00000056621	0	0	0	0	0.586	0	0	0.166	0.64
Cd53	Srgn	10090.ENSMUSP00000035781	10090.ENSMUSP00000125622	0	0	0	0	0.567	0	0	0.222	0.648
Cd5l	Vsig4	10090.ENSMUSP00000015998	10090.ENSMUSP00000051521	0	0	0	0	0.346	0	0	0.278	0.508
Cd84	Havcr2	10090.ENSMUSP00000120881	10090.ENSMUSP00000020668	0	0	0	0	0.357	0	0	0.158	0.436
Cd84	Ly86	10090.ENSMUSP00000120881	10090.ENSMUSP00000021860	0	0	0	0	0.419	0	0	0.241	0.541
Cd84	Ms4a6d	10090.ENSMUSP00000120881	10090.ENSMUSP00000025582	0	0	0	0	0.412	0	0	0.058	0.423
Cd84	Lpxn	10090.ENSMUSP00000120881	10090.ENSMUSP00000025601	0	0	0	0	0.371	0	0	0.089	0.402
Cd84	Tyrobp	10090.ENSMUSP00000120881	10090.ENSMUSP00000032800	0	0	0	0	0.419	0	0	0.237	0.537
Cd84	Igsf6	10090.ENSMUSP00000120881	10090.ENSMUSP00000039059	0	0	0	0	0.478	0	0	0	0.478
Cd84	Lcp2	10090.ENSMUSP00000120881	10090.ENSMUSP00000056621	0	0	0	0	0.439	0	0	0.102	0.475
Cd84	Tlr7	10090.ENSMUSP00000120881	10090.ENSMUSP00000061853	0	0	0	0	0.262	0	0	0.223	0.402
Cd84	Fcer1g	10090.ENSMUSP00000120881	10090.ENSMUSP00000078875	0	0	0	0	0.411	0	0	0.312	0.578
Cd84	Plek	10090.ENSMUSP00000120881	10090.ENSMUSP00000099945	0	0	0	0	0.434	0	0	0.091	0.463
Cd84	Tgm3	10090.ENSMUSP00000120881	10090.ENSMUSP00000105928	0	0	0	0	0	0	0	0.45	0.45
Cd84	Samsn1	10090.ENSMUSP00000120881	10090.ENSMUSP00000109877	0	0	0	0	0.175	0	0	0.432	0.511
Cd84	Ms4a6b	10090.ENSMUSP00000120881	10090.ENSMUSP00000124685	0	0	0	0	0.411	0	0	0.056	0.42
Cd84	Ncf2	10090.ENSMUSP00000120881	10090.ENSMUSP00000140404	0	0	0	0	0.417	0	0	0.07	0.435
Cdh4	Fgfr4	10090.ENSMUSP00000000314	10090.ENSMUSP00000005452	0	0	0	0	0	0.136	0.38	0.195	0.531
Cdh4	Ntrk3	10090.ENSMUSP00000000314	10090.ENSMUSP00000037909	0	0	0	0	0.076	0.058	0.451	0.255	0.596
Cela1	Krt19	10090.ENSMUSP00000023775	10090.ENSMUSP00000007317	0	0	0	0	0.061	0.132	0	0.355	0.428
Cemip	Frmd3	10090.ENSMUSP00000063277	10090.ENSMUSP00000081514	0	0	0	0	0	0	0	0.457	0.457
Chil1	Tnf	10090.ENSMUSP00000080717	10090.ENSMUSP00000025263	0	0	0	0	0.048	0	0	0.395	0.4
Chil1	Il1b	10090.ENSMUSP00000080717	10090.ENSMUSP00000028881	0	0	0	0	0.122	0	0	0.367	0.421
Chil1	Lcn2	10090.ENSMUSP00000080717	10090.ENSMUSP00000053962	0	0	0	0	0.213	0	0	0.459	0.556
Chil1	Osm	10090.ENSMUSP00000080717	10090.ENSMUSP00000074708	0	0	0	0	0.062	0	0	0.442	0.454
Chil3	Cybb	10090.ENSMUSP00000053923	10090.ENSMUSP00000015484	0	0	0	0	0.163	0	0	0.361	0.443
Chil3	Il10	10090.ENSMUSP00000053923	10090.ENSMUSP00000016673	0	0	0	0	0.052	0	0	0.737	0.74
Chil3	Trem2	10090.ENSMUSP00000053923	10090.ENSMUSP00000024791	0	0	0	0	0.099	0	0	0.464	0.496
Chil3	Tnf	10090.ENSMUSP00000053923	10090.ENSMUSP00000025263	0	0	0	0	0.116	0	0	0.715	0.737
Chil3	Msr1	10090.ENSMUSP00000053923	10090.ENSMUSP00000026021	0	0	0	0	0.122	0	0	0.383	0.435
Chil3	Il1b	10090.ENSMUSP00000053923	10090.ENSMUSP00000028881	0	0	0	0	0.166	0	0	0.699	0.738
Chil3	Cxcl2	10090.ENSMUSP00000053923	10090.ENSMUSP00000074885	0	0	0	0	0.113	0	0	0.361	0.408
Chil3	S100a9	10090.ENSMUSP00000053923	10090.ENSMUSP00000112843	0	0	0	0	0.411	0	0	0.133	0.467
Chil3	S100a8	10090.ENSMUSP00000053923	10090.ENSMUSP00000064385	0	0	0	0	0.417	0	0	0.133	0.472
Clec11a	Csf3	10090.ENSMUSP00000004587	10090.ENSMUSP00000037762	0	0	0	0	0	0	0	0.469	0.469
Clec4a1	Sirpb1c	10090.ENSMUSP00000062441	10090.ENSMUSP00000061216	0	0	0	0	0.115	0	0	0.467	0.508
Clec4a1	Gm9733	10090.ENSMUSP00000062441	10090.ENSMUSP00000103998	0	0	0	0	0.089	0	0	0.528	0.551
Clec4d	Saa3	10090.ENSMUSP00000032240	10090.ENSMUSP00000006956	0	0	0	0	0.214	0	0	0.301	0.427
Clec4d	Irg1	10090.ENSMUSP00000032240	10090.ENSMUSP00000022722	0	0	0	0	0.406	0	0	0.069	0.423
Clec4d	Clec4n	10090.ENSMUSP00000032240	10090.ENSMUSP00000024118	0	0	0	0.886	0.418	0	0	0.85	0.474
Clec4d	Trem2	10090.ENSMUSP00000032240	10090.ENSMUSP00000024791	0	0	0	0	0.34	0	0	0.179	0.435
Clec4d	Ms4a6d	10090.ENSMUSP00000032240	10090.ENSMUSP00000025582	0	0	0	0	0.599	0	0	0.256	0.689
Clec4d	Lpxn	10090.ENSMUSP00000032240	10090.ENSMUSP00000025601	0	0	0	0	0.401	0.045	0	0	0.403
Clec4d	Slc15a3	10090.ENSMUSP00000032240	10090.ENSMUSP00000025646	0	0	0	0	0.41	0	0	0.049	0.414
Clec4d	Msr1	10090.ENSMUSP00000032240	10090.ENSMUSP00000026021	0	0	0	0	0.423	0	0	0.067	0.438
Clec4d	Slc11a1	10090.ENSMUSP00000032240	10090.ENSMUSP00000027368	0	0	0	0	0.561	0	0	0.255	0.659
Clec4d	Siglec1	10090.ENSMUSP00000032240	10090.ENSMUSP00000028794	0	0	0	0	0.093	0.048	0	0.361	0.4
Clec4d	Il1b	10090.ENSMUSP00000032240	10090.ENSMUSP00000028881	0	0	0	0	0.418	0	0	0.225	0.529
Clec4d	Clec4e	10090.ENSMUSP00000032240	10090.ENSMUSP00000032239	0	0	0.239	0.866	0.642	0	0.8	0.912	0.936
Clec4d	Clec5a	10090.ENSMUSP00000032240	10090.ENSMUSP00000121848	0	0	0	0.637	0.272	0	0	0.529	0.406
Clec4d	Fam57b	10090.ENSMUSP00000032240	10090.ENSMUSP00000078392	0	0	0	0	0	0	0	0.408	0.408
Clec4d	Plek	10090.ENSMUSP00000032240	10090.ENSMUSP00000099945	0	0	0	0	0.423	0	0	0	0.423
Clec4d	Ms4a6c	10090.ENSMUSP00000032240	10090.ENSMUSP00000132425	0	0	0	0	0.203	0	0	0.316	0.431
Clec4d	Tlr8	10090.ENSMUSP00000032240	10090.ENSMUSP00000107793	0	0	0	0	0.246	0.047	0.155	0.197	0.447
Clec4d	Igsf6	10090.ENSMUSP00000032240	10090.ENSMUSP00000039059	0	0	0	0	0.397	0	0	0.155	0.469
Clec4d	Cxcl2	10090.ENSMUSP00000032240	10090.ENSMUSP00000074885	0	0	0	0	0.368	0.045	0	0.243	0.503
Clec4d	Tyrobp	10090.ENSMUSP00000032240	10090.ENSMUSP00000032800	0	0	0	0	0.42	0	0	0.268	0.558
Clec4d	Fcer1g	10090.ENSMUSP00000032240	10090.ENSMUSP00000078875	0	0	0	0	0.418	0.05	0.836	0.738	0.973
Clec4e	Il10	10090.ENSMUSP00000032239	10090.ENSMUSP00000016673	0	0	0	0	0.112	0	0	0.484	0.522
Clec4e	Irg1	10090.ENSMUSP00000032239	10090.ENSMUSP00000022722	0	0	0	0	0.712	0	0	0.35	0.804
Clec4e	Clec4n	10090.ENSMUSP00000032239	10090.ENSMUSP00000024118	0	0	0	0.868	0.21	0	0.6	0.894	0.709
Clec4e	Tnf	10090.ENSMUSP00000032239	10090.ENSMUSP00000025263	0	0	0	0	0.411	0	0	0.551	0.724
Clec4e	Siglec1	10090.ENSMUSP00000032239	10090.ENSMUSP00000028794	0	0	0	0	0.082	0.048	0	0.417	0.446
Clec4e	Il1b	10090.ENSMUSP00000032239	10090.ENSMUSP00000028881	0	0	0	0	0.597	0	0	0.552	0.811
Clec4e	Csf3	10090.ENSMUSP00000032239	10090.ENSMUSP00000037762	0	0	0	0	0.079	0	0	0.379	0.403
Clec4e	Clec5a	10090.ENSMUSP00000032239	10090.ENSMUSP00000121848	0	0	0	0.704	0.351	0	0	0.624	0.468
Clec4e	Tlr8	10090.ENSMUSP00000032239	10090.ENSMUSP00000107793	0	0	0	0	0.156	0.047	0.155	0.361	0.507
Clec4e	Tyrobp	10090.ENSMUSP00000032239	10090.ENSMUSP00000032800	0	0	0	0	0.179	0	0	0.464	0.541
Clec4e	Tlr7	10090.ENSMUSP00000032239	10090.ENSMUSP00000061853	0	0	0	0	0.134	0.047	0.155	0.472	0.583
Clec4e	Nlrp3	10090.ENSMUSP00000032239	10090.ENSMUSP00000098707	0	0	0	0	0.218	0	0	0.499	0.591
Clec4e	Cxcl2	10090.ENSMUSP00000032239	10090.ENSMUSP00000074885	0	0	0	0	0.582	0.045	0	0.464	0.767
Clec4e	Fcer1g	10090.ENSMUSP00000032239	10090.ENSMUSP00000078875	0	0	0	0	0.21	0.054	0.836	0.988	0.998
Clec4n	Cybb	10090.ENSMUSP00000024118	10090.ENSMUSP00000015484	0	0	0	0	0.426	0	0	0.132	0.48
Clec4n	Il10	10090.ENSMUSP00000024118	10090.ENSMUSP00000016673	0	0	0	0	0.061	0	0	0.515	0.525
Clec4n	Ly86	10090.ENSMUSP00000024118	10090.ENSMUSP00000021860	0	0	0	0	0.418	0	0	0	0.418
Clec4n	Slc15a3	10090.ENSMUSP00000024118	10090.ENSMUSP00000025646	0	0	0	0	0.406	0	0	0	0.406
Clec4n	Msr1	10090.ENSMUSP00000024118	10090.ENSMUSP00000026021	0	0	0	0	0.405	0	0	0.062	0.418
Clec4n	Slc11a1	10090.ENSMUSP00000024118	10090.ENSMUSP00000027368	0	0	0	0	0.407	0	0	0.059	0.418
Clec4n	Igsf6	10090.ENSMUSP00000024118	10090.ENSMUSP00000039059	0	0	0	0	0.424	0	0	0.097	0.458
Clec4n	Ms4a6b	10090.ENSMUSP00000024118	10090.ENSMUSP00000124685	0	0	0	0	0.419	0	0	0.115	0.463
Clec4n	Ms4a6c	10090.ENSMUSP00000024118	10090.ENSMUSP00000132425	0	0	0	0	0.419	0	0	0.146	0.482
Clec4n	Ms4a7	10090.ENSMUSP00000024118	10090.ENSMUSP00000064534	0	0	0	0	0.407	0	0	0.175	0.489
Clec4n	Cxcl2	10090.ENSMUSP00000024118	10090.ENSMUSP00000074885	0	0	0	0	0.186	0.045	0	0.399	0.491
Clec4n	Tlr8	10090.ENSMUSP00000024118	10090.ENSMUSP00000107793	0	0	0	0	0.171	0.047	0.155	0.338	0.499
Clec4n	Nlrp3	10090.ENSMUSP00000024118	10090.ENSMUSP00000098707	0	0	0	0	0.162	0	0	0.464	0.531
Clec4n	Tlr7	10090.ENSMUSP00000024118	10090.ENSMUSP00000061853	0	0	0	0	0.209	0.047	0.155	0.416	0.578
Clec4n	Tnf	10090.ENSMUSP00000024118	10090.ENSMUSP00000025263	0	0	0	0	0.158	0	0	0.551	0.605
Clec4n	Il1b	10090.ENSMUSP00000024118	10090.ENSMUSP00000028881	0	0	0	0	0.333	0	0	0.551	0.687
Clec4n	Ms4a6d	10090.ENSMUSP00000024118	10090.ENSMUSP00000025582	0	0	0	0	0.698	0	0	0.114	0.721
Clec4n	Tyrobp	10090.ENSMUSP00000024118	10090.ENSMUSP00000032800	0	0	0	0	0.607	0	0	0.431	0.766
Clec4n	Fcer1g	10090.ENSMUSP00000024118	10090.ENSMUSP00000078875	0	0	0	0	0.343	0.05	0.836	0.989	0.998
Clec5a	Trem2	10090.ENSMUSP00000121848	10090.ENSMUSP00000024791	0	0	0	0	0.169	0	0	0.552	0.611
Clec5a	Tnf	10090.ENSMUSP00000121848	10090.ENSMUSP00000025263	0	0	0	0	0.21	0	0	0.309	0.431
Clec5a	Siglec1	10090.ENSMUSP00000121848	10090.ENSMUSP00000028794	0	0	0	0	0.121	0.048	0	0.402	0.456
Clec5a	Tyrobp	10090.ENSMUSP00000121848	10090.ENSMUSP00000032800	0	0	0	0	0.267	0.436	0.6	0.981	0.996
Clec5a	Trem3	10090.ENSMUSP00000121848	10090.ENSMUSP00000044478	0	0	0	0	0.208	0	0	0.407	0.511
Clec5a	Tlr7	10090.ENSMUSP00000121848	10090.ENSMUSP00000061853	0	0	0	0	0.195	0.047	0.155	0.294	0.481
Clec5a	Fcer1g	10090.ENSMUSP00000121848	10090.ENSMUSP00000078875	0	0	0	0	0.215	0.05	0.216	0.645	0.765
Clec5a	Sirpb1a	10090.ENSMUSP00000121848	10090.ENSMUSP00000096807	0	0	0	0	0.106	0	0	0.552	0.582
Clec5a	Tlr8	10090.ENSMUSP00000121848	10090.ENSMUSP00000107793	0	0	0	0	0.226	0.047	0.155	0.245	0.466
Cmpk2	Slfn4	10090.ENSMUSP00000020969	10090.ENSMUSP00000000208	0	0	0	0	0.179	0	0	0.399	0.485
Cmpk2	Upp1	10090.ENSMUSP00000020969	10090.ENSMUSP00000020677	0	0	0	0	0	0	0	0.597	0.597
Cmpk2	Oas3	10090.ENSMUSP00000020969	10090.ENSMUSP00000035588	0	0	0	0	0.283	0	0	0.307	0.481
Cmpk2	Gm14446	10090.ENSMUSP00000020969	10090.ENSMUSP00000108086	0.045	0	0	0	0.384	0	0	0.273	0.535
Cmpk2	Oas1a	10090.ENSMUSP00000020969	10090.ENSMUSP00000079198	0	0	0	0	0.355	0	0	0.37	0.576
Cmpk2	Oas1g	10090.ENSMUSP00000020969	10090.ENSMUSP00000083555	0	0	0	0	0.36	0	0	0.392	0.594
Cmpk2	Samd9l	10090.ENSMUSP00000020969	10090.ENSMUSP00000112688	0	0	0	0	0.466	0	0	0.288	0.604
Cmpk2	Oas2	10090.ENSMUSP00000020969	10090.ENSMUSP00000060082	0	0	0	0	0.419	0	0	0.4	0.637
Cmpk2	Isg15	10090.ENSMUSP00000020969	10090.ENSMUSP00000082548	0	0	0	0	0.368	0	0	0.49	0.664
Cmpk2	Ifi44	10090.ENSMUSP00000020969	10090.ENSMUSP00000029671	0	0	0	0	0.498	0	0	0.476	0.726
Cmpk2	Irf7	10090.ENSMUSP00000020969	10090.ENSMUSP00000026571	0	0	0	0	0.709	0	0	0.272	0.779
Cmpk2	Herc6	10090.ENSMUSP00000020969	10090.ENSMUSP00000031817	0	0	0	0	0.622	0	0	0.5	0.803
Cmpk2	Epsti1	10090.ENSMUSP00000020969	10090.ENSMUSP00000022591	0	0	0	0	0.545	0	0	0.598	0.809
Cmpk2	Oasl1	10090.ENSMUSP00000020969	10090.ENSMUSP00000031540	0	0	0	0	0.794	0	0	0.407	0.872
Cmpk2	Oasl2	10090.ENSMUSP00000020969	10090.ENSMUSP00000031542	0	0	0	0	0.796	0	0	0.439	0.881
Cmpk2	Ifit1	10090.ENSMUSP00000020969	10090.ENSMUSP00000099888	0.045	0	0	0	0.771	0	0	0.538	0.89
Cmpk2	Rsad2	10090.ENSMUSP00000020969	10090.ENSMUSP00000020970	0	0	0	0	0.884	0	0	0.743	0.968
Cnfn	Tcf23	10090.ENSMUSP00000130957	10090.ENSMUSP00000006818	0	0	0	0	0	0	0	0.419	0.419
Cnfn	Serpinb3c	10090.ENSMUSP00000130957	10090.ENSMUSP00000027565	0	0	0	0	0.27	0	0	0.379	0.527
Cnfn	Serpinb3a	10090.ENSMUSP00000130957	10090.ENSMUSP00000027567	0	0	0	0	0.1	0	0	0.436	0.471
Cnfn	Rptn	10090.ENSMUSP00000130957	10090.ENSMUSP00000044998	0	0	0	0	0.38	0	0	0.313	0.556
Cnfn	Lce3c	10090.ENSMUSP00000130957	10090.ENSMUSP00000050666	0	0	0	0	0.59	0	0	0	0.59
Cnfn	Sprr1b	10090.ENSMUSP00000130957	10090.ENSMUSP00000058617	0	0	0	0	0.224	0	0	0.492	0.589
Cnfn	Spink7	10090.ENSMUSP00000130957	10090.ENSMUSP00000075551	0	0	0	0	0	0	0	0.44	0.44
Cnfn	Lce3e	10090.ENSMUSP00000130957	10090.ENSMUSP00000096484	0	0	0	0	0.153	0	0	0.371	0.444
Cnfn	Tgm3	10090.ENSMUSP00000130957	10090.ENSMUSP00000105928	0	0	0	0	0.13	0	0	0.355	0.415
Cnfn	Lce3d	10090.ENSMUSP00000130957	10090.ENSMUSP00000130993	0	0	0	0	0.112	0	0	0.635	0.662
Col11a1	Col1a1	10090.ENSMUSP00000089793	10090.ENSMUSP00000001547	0	0	0.421	0.849	0.215	0.061	0.72	0.648	0.809
Col11a1	Mmp13	10090.ENSMUSP00000089793	10090.ENSMUSP00000015394	0	0	0	0	0	0.058	0	0.469	0.478
Col11a1	Col1a2	10090.ENSMUSP00000089793	10090.ENSMUSP00000031668	0	0	0.425	0.843	0.262	0.087	0.814	0.608	0.884
Col11a1	Pdgfrl	10090.ENSMUSP00000089793	10090.ENSMUSP00000034004	0	0	0	0	0.094	0.087	0.127	0.39	0.501
Col11a1	Fmod	10090.ENSMUSP00000089793	10090.ENSMUSP00000035489	0	0	0	0	0.154	0.06	0	0.495	0.563
Col11a1	Col4a6	10090.ENSMUSP00000089793	10090.ENSMUSP00000098765	0	0	0.285	0.652	0.07	0	0.3	0.36	0.453
Col1a1	Pdgfrl	10090.ENSMUSP00000001547	10090.ENSMUSP00000034004	0	0	0	0	0.194	0.087	0.127	0.197	0.415
Col1a1	Vcam1	10090.ENSMUSP00000001547	10090.ENSMUSP00000029574	0	0	0	0	0.104	0	0	0.392	0.431
Col1a1	Mmp10	10090.ENSMUSP00000001547	10090.ENSMUSP00000034488	0	0	0	0	0.071	0.05	0	0.411	0.435
Col1a1	Col4a6	10090.ENSMUSP00000001547	10090.ENSMUSP00000098765	0	0	0.369	0.688	0.077	0	0.3	0.404	0.469
Col1a1	Fbxo32	10090.ENSMUSP00000001547	10090.ENSMUSP00000022986	0	0	0	0	0	0.433	0	0.117	0.477
Col1a1	Krt19	10090.ENSMUSP00000001547	10090.ENSMUSP00000007317	0	0	0	0	0.14	0	0	0.464	0.519
Col1a1	Il1b	10090.ENSMUSP00000001547	10090.ENSMUSP00000028881	0	0	0	0	0	0	0	0.549	0.549
Col1a1	Tnf	10090.ENSMUSP00000001547	10090.ENSMUSP00000025263	0	0	0	0	0	0.064	0	0.587	0.596
Col1a1	Thbs1	10090.ENSMUSP00000001547	10090.ENSMUSP00000044903	0	0	0	0	0.174	0.13	0	0.545	0.645
Col1a1	Tnmd	10090.ENSMUSP00000001547	10090.ENSMUSP00000033602	0	0	0	0	0.106	0	0	0.67	0.692
Col1a1	Mmp13	10090.ENSMUSP00000001547	10090.ENSMUSP00000015394	0	0	0	0	0.079	0.058	0	0.692	0.71
Col1a1	Fmod	10090.ENSMUSP00000001547	10090.ENSMUSP00000035489	0	0	0	0	0.388	0.06	0	0.555	0.722
Col1a1	Spp1	10090.ENSMUSP00000001547	10090.ENSMUSP00000108367	0	0	0	0	0.103	0	0	0.729	0.746
Col1a1	Timp1	10090.ENSMUSP00000001547	10090.ENSMUSP00000009530	0	0	0	0	0.221	0.066	0	0.724	0.782
Col1a1	Col1a2	10090.ENSMUSP00000001547	10090.ENSMUSP00000031668	0	0	0.44	0.957	0.978	0.729	0.966	0.948	0.999
Col1a2	Timp1	10090.ENSMUSP00000031668	10090.ENSMUSP00000009530	0	0	0	0	0.219	0.047	0	0.606	0.681
Col1a2	Mmp13	10090.ENSMUSP00000031668	10090.ENSMUSP00000015394	0	0	0	0	0.058	0	0	0.503	0.512
Col1a2	Tnf	10090.ENSMUSP00000031668	10090.ENSMUSP00000025263	0	0	0	0	0	0.055	0	0.4	0.408
Col1a2	Thbs1	10090.ENSMUSP00000031668	10090.ENSMUSP00000044903	0	0	0	0	0.177	0.047	0	0.401	0.49
Col1a2	Spp1	10090.ENSMUSP00000031668	10090.ENSMUSP00000108367	0	0	0	0	0.13	0	0	0.474	0.523
Col1a2	Pdgfrl	10090.ENSMUSP00000031668	10090.ENSMUSP00000034004	0	0	0	0	0.26	0.087	0.127	0.306	0.536
Col1a2	Fmod	10090.ENSMUSP00000031668	10090.ENSMUSP00000035489	0	0	0	0	0.281	0.06	0	0.499	0.632
Col1a2	Col4a6	10090.ENSMUSP00000031668	10090.ENSMUSP00000098765	0	0	0.416	0.701	0.146	0.087	0.485	0.394	0.657
Col1a2	Tnmd	10090.ENSMUSP00000031668	10090.ENSMUSP00000033602	0	0	0	0	0.114	0	0	0.661	0.687
Col4a6	Pdgfrl	10090.ENSMUSP00000098765	10090.ENSMUSP00000034004	0	0	0	0	0.052	0.087	0.127	0.366	0.457
Csf3	Timp1	10090.ENSMUSP00000037762	10090.ENSMUSP00000009530	0	0	0	0	0	0	0	0.539	0.539
Csf3	Il10	10090.ENSMUSP00000037762	10090.ENSMUSP00000016673	0	0	0	0	0.056	0	0	0.851	0.853
Csf3	Irg1	10090.ENSMUSP00000037762	10090.ENSMUSP00000022722	0	0	0	0	0.112	0	0	0.361	0.408
Csf3	Tnf	10090.ENSMUSP00000037762	10090.ENSMUSP00000025263	0	0	0	0	0.105	0	0	0.851	0.861
Csf3	Il1b	10090.ENSMUSP00000037762	10090.ENSMUSP00000028881	0	0	0	0	0.127	0	0	0.846	0.859
Csf3	Vcam1	10090.ENSMUSP00000037762	10090.ENSMUSP00000029574	0	0	0	0	0	0	0	0.62	0.62
Csf3	Cxcl3	10090.ENSMUSP00000037762	10090.ENSMUSP00000031326	0	0	0	0	0.115	0	0	0.431	0.475
Csf3	Ptgs2	10090.ENSMUSP00000037762	10090.ENSMUSP00000035065	0	0	0	0	0.123	0	0	0.525	0.565
Csf3	Tlr7	10090.ENSMUSP00000037762	10090.ENSMUSP00000061853	0	0	0	0	0	0	0	0.463	0.463
Csf3	Lcn2	10090.ENSMUSP00000037762	10090.ENSMUSP00000053962	0	0	0	0	0.082	0	0	0.464	0.486
Csf3	Spp1	10090.ENSMUSP00000037762	10090.ENSMUSP00000108367	0	0	0	0	0	0	0	0.495	0.495
Csf3	Osm	10090.ENSMUSP00000037762	10090.ENSMUSP00000074708	0	0	0	0	0.073	0	0	0.527	0.542
Csf3	Cxcr2	10090.ENSMUSP00000037762	10090.ENSMUSP00000102512	0	0	0	0	0	0	0	0.686	0.686
Csf3	Cxcl2	10090.ENSMUSP00000037762	10090.ENSMUSP00000074885	0	0	0	0	0.175	0	0	0.764	0.797
Cspg5	Ncan	10090.ENSMUSP00000035058	10090.ENSMUSP00000002412	0	0	0	0	0.219	0	0.3	0.662	0.799
Cspg5	Ptn	10090.ENSMUSP00000035058	10090.ENSMUSP00000099073	0	0	0	0	0.105	0	0	0.464	0.499
Cubn	Lcn2	10090.ENSMUSP00000089009	10090.ENSMUSP00000053962	0	0	0	0	0	0	0	0.476	0.476
Cxcl2	Ier3	10090.ENSMUSP00000074885	10090.ENSMUSP00000003635	0	0	0	0	0.236	0	0	0.317	0.456
Cxcl2	Saa3	10090.ENSMUSP00000074885	10090.ENSMUSP00000006956	0	0	0	0	0.23	0	0	0.464	0.569
Cxcl2	Timp1	10090.ENSMUSP00000074885	10090.ENSMUSP00000009530	0	0	0	0	0.099	0	0	0.55	0.577
Cxcl2	Mmp13	10090.ENSMUSP00000074885	10090.ENSMUSP00000015394	0	0	0	0	0.144	0.058	0	0.429	0.499
Cxcl2	Cybb	10090.ENSMUSP00000074885	10090.ENSMUSP00000015484	0	0	0	0	0.186	0	0	0.366	0.461
Cxcl2	Il10	10090.ENSMUSP00000074885	10090.ENSMUSP00000016673	0	0	0	0	0.136	0	0	0.836	0.852
Cxcl2	Irg1	10090.ENSMUSP00000074885	10090.ENSMUSP00000022722	0	0	0	0	0.608	0	0	0.318	0.722
Cxcl2	Tnf	10090.ENSMUSP00000074885	10090.ENSMUSP00000025263	0	0	0	0	0.42	0	0	0.846	0.907
Cxcl2	Irf7	10090.ENSMUSP00000074885	10090.ENSMUSP00000026571	0	0	0	0	0.086	0	0	0.401	0.429
Cxcl2	Serpinb3c	10090.ENSMUSP00000074885	10090.ENSMUSP00000027565	0	0	0	0	0	0	0	0.465	0.465
Cxcl2	Il1f6	10090.ENSMUSP00000074885	10090.ENSMUSP00000028361	0	0	0	0	0.096	0	0	0.418	0.452
Cxcl2	Il1b	10090.ENSMUSP00000074885	10090.ENSMUSP00000028881	0	0	0	0	0.72	0	0	0.9	0.971
Cxcl2	Vcam1	10090.ENSMUSP00000074885	10090.ENSMUSP00000029574	0	0	0	0	0.079	0	0	0.663	0.676
Cxcl2	Cxcl3	10090.ENSMUSP00000074885	10090.ENSMUSP00000031326	0	0	0	0.976	0.51	0	0.8	0.823	0.899
Cxcl2	Ptgs2	10090.ENSMUSP00000074885	10090.ENSMUSP00000035065	0	0	0	0	0.268	0	0	0.658	0.739
Cxcl2	Lcn2	10090.ENSMUSP00000074885	10090.ENSMUSP00000053962	0	0	0	0	0.133	0	0	0.552	0.594
Cxcl2	Hcar2	10090.ENSMUSP00000074885	10090.ENSMUSP00000054104	0	0	0	0	0.298	0.087	0.144	0.128	0.457
Cxcl2	Tlr7	10090.ENSMUSP00000074885	10090.ENSMUSP00000061853	0	0	0	0	0.117	0	0	0.556	0.592
Cxcl2	Osm	10090.ENSMUSP00000074885	10090.ENSMUSP00000074708	0	0	0	0	0.147	0	0	0.329	0.403
Cxcl2	Tlr8	10090.ENSMUSP00000074885	10090.ENSMUSP00000107793	0	0	0	0	0.114	0	0	0.356	0.405
Cxcl2	Spp1	10090.ENSMUSP00000074885	10090.ENSMUSP00000108367	0	0	0	0	0.097	0	0	0.402	0.437
Cxcl2	Serpinb6e	10090.ENSMUSP00000074885	10090.ENSMUSP00000105904	0	0	0	0	0.052	0	0	0.465	0.471
Cxcl2	Nlrp3	10090.ENSMUSP00000074885	10090.ENSMUSP00000098707	0	0	0	0	0.205	0	0	0.545	0.622
Cxcl2	Cxcr2	10090.ENSMUSP00000074885	10090.ENSMUSP00000102512	0	0	0	0	0.049	0.161	0.821	0.989	0.998
Cxcl3	Il10	10090.ENSMUSP00000031326	10090.ENSMUSP00000016673	0	0	0	0	0.064	0	0	0.664	0.672
Cxcl3	Irg1	10090.ENSMUSP00000031326	10090.ENSMUSP00000022722	0	0	0	0	0.29	0	0	0.307	0.488
Cxcl3	Tnf	10090.ENSMUSP00000031326	10090.ENSMUSP00000025263	0	0	0	0	0.116	0	0	0.59	0.622
Cxcl3	Il1f6	10090.ENSMUSP00000031326	10090.ENSMUSP00000028361	0	0	0	0	0.083	0	0	0.424	0.45
Cxcl3	Il1b	10090.ENSMUSP00000031326	10090.ENSMUSP00000028881	0	0	0	0	0.245	0	0	0.755	0.807
Cxcl3	Vcam1	10090.ENSMUSP00000031326	10090.ENSMUSP00000029574	0	0	0	0	0	0	0	0.412	0.412
Cxcl3	Ptgs2	10090.ENSMUSP00000031326	10090.ENSMUSP00000035065	0	0	0	0	0.148	0	0	0.522	0.576
Cxcl3	Cxcr2	10090.ENSMUSP00000031326	10090.ENSMUSP00000102512	0	0	0	0	0.069	0.155	0.821	0.972	0.995
Cxcr2	Il10	10090.ENSMUSP00000102512	10090.ENSMUSP00000016673	0	0	0	0	0.061	0	0	0.602	0.61
Cxcr2	Tnf	10090.ENSMUSP00000102512	10090.ENSMUSP00000025263	0	0	0	0	0.061	0	0	0.698	0.704
Cxcr2	Il1b	10090.ENSMUSP00000102512	10090.ENSMUSP00000028881	0	0	0	0	0.158	0.046	0	0.691	0.73
Cxcr2	Vcam1	10090.ENSMUSP00000102512	10090.ENSMUSP00000029574	0	0	0	0	0	0	0	0.551	0.551
Cxcr2	Ptgs2	10090.ENSMUSP00000102512	10090.ENSMUSP00000035065	0	0	0	0	0.052	0.055	0	0.4	0.415
Cxcr2	Gnao1	10090.ENSMUSP00000102512	10090.ENSMUSP00000114144	0	0	0	0	0	0.234	0.352	0.08	0.503
Cybb	Cyp4f18	10090.ENSMUSP00000015484	10090.ENSMUSP00000003574	0	0	0	0	0.163	0.692	0	0.072	0.74
Cybb	Ms4a6c	10090.ENSMUSP00000015484	10090.ENSMUSP00000132425	0	0	0	0	0.42	0	0	0	0.42
Cybb	Ms4a6d	10090.ENSMUSP00000015484	10090.ENSMUSP00000025582	0	0	0	0	0.421	0	0	0	0.421
Cybb	Pmaip1	10090.ENSMUSP00000015484	10090.ENSMUSP00000025399	0	0	0	0	0	0	0	0.424	0.424
Cybb	Ms4a6b	10090.ENSMUSP00000015484	10090.ENSMUSP00000124685	0	0	0	0	0.417	0	0	0.068	0.433
Cybb	Msr1	10090.ENSMUSP00000015484	10090.ENSMUSP00000026021	0	0	0	0	0.419	0	0	0.075	0.44
Cybb	Slc15a3	10090.ENSMUSP00000015484	10090.ENSMUSP00000025646	0	0	0	0	0.421	0	0	0.074	0.441
Cybb	Glrx	10090.ENSMUSP00000015484	10090.ENSMUSP00000022082	0	0	0	0	0.056	0	0	0.483	0.491
Cybb	Fcer1g	10090.ENSMUSP00000015484	10090.ENSMUSP00000078875	0	0	0	0	0.436	0	0	0.159	0.505
Cybb	Plek	10090.ENSMUSP00000015484	10090.ENSMUSP00000099945	0	0	0	0	0.491	0	0	0.136	0.542
Cybb	Ly86	10090.ENSMUSP00000015484	10090.ENSMUSP00000021860	0	0	0	0	0.472	0	0	0.172	0.544
Cybb	Il10	10090.ENSMUSP00000015484	10090.ENSMUSP00000016673	0	0	0	0	0.069	0	0	0.555	0.568
Cybb	Ptgs2	10090.ENSMUSP00000015484	10090.ENSMUSP00000035065	0	0	0	0	0.062	0.088	0	0.544	0.576
Cybb	Nlrp3	10090.ENSMUSP00000015484	10090.ENSMUSP00000098707	0	0	0	0	0.175	0	0	0.537	0.601
Cybb	Tyrobp	10090.ENSMUSP00000015484	10090.ENSMUSP00000032800	0	0	0	0	0.554	0	0	0.171	0.614
Cybb	Tlr7	10090.ENSMUSP00000015484	10090.ENSMUSP00000061853	0	0	0	0	0.463	0.076	0	0.319	0.632
Cybb	Igsf6	10090.ENSMUSP00000015484	10090.ENSMUSP00000039059	0	0	0	0	0.639	0	0	0.059	0.646
Cybb	Slc11a1	10090.ENSMUSP00000015484	10090.ENSMUSP00000027368	0	0	0	0	0.419	0	0	0.43	0.655
Cybb	S100a8	10090.ENSMUSP00000015484	10090.ENSMUSP00000064385	0	0	0	0	0.203	0	0.6	0.154	0.707
Cybb	S100a9	10090.ENSMUSP00000015484	10090.ENSMUSP00000112843	0	0	0	0	0.162	0	0.6	0.241	0.723
Cybb	Tnf	10090.ENSMUSP00000015484	10090.ENSMUSP00000025263	0	0	0	0	0.189	0	0	0.714	0.758
Cybb	Il1b	10090.ENSMUSP00000015484	10090.ENSMUSP00000028881	0	0	0	0	0.239	0	0	0.695	0.758
Cybb	Ripk3	10090.ENSMUSP00000015484	10090.ENSMUSP00000022830	0	0	0	0	0.066	0.075	0.8	0.179	0.839
Cybb	Vcam1	10090.ENSMUSP00000015484	10090.ENSMUSP00000029574	0	0	0	0	0.119	0	0.9	0.565	0.958
Cybb	Ncf2	10090.ENSMUSP00000015484	10090.ENSMUSP00000140404	0	0	0	0	0.427	0.209	0.932	0.991	0.999
Cybb	Ncf1	10090.ENSMUSP00000015484	10090.ENSMUSP00000016094	0	0	0	0	0.423	0.087	0.932	0.993	0.999
Cybrd1	Slc11a1	10090.ENSMUSP00000028403	10090.ENSMUSP00000027368	0	0	0	0	0.061	0	0	0.435	0.447
Cyp2b23	Cyp4f18	10090.ENSMUSP00000076578	10090.ENSMUSP00000003574	0	0	0.439	0.572	0.061	0	0.65	0.069	0.721
Cyp2b23	Gsta4	10090.ENSMUSP00000076578	10090.ENSMUSP00000034903	0	0	0	0	0.061	0.047	0.65	0.043	0.66
Cyp2b23	Ptgs2	10090.ENSMUSP00000076578	10090.ENSMUSP00000035065	0	0	0	0	0.05	0.046	0.65	0.049	0.657
Cyp2b23	Pla2g4d	10090.ENSMUSP00000076578	10090.ENSMUSP00000092252	0	0	0	0	0	0	0.65	0	0.65
Cyp2b23	Gsta1	10090.ENSMUSP00000076578	10090.ENSMUSP00000096139	0	0	0	0	0	0.047	0.65	0	0.652
Cyp4f18	Gm11710	10090.ENSMUSP00000003574	10090.ENSMUSP00000097811	0	0	0	0	0	0	0	0.44	0.44
Cyp4f18	Pla2g4d	10090.ENSMUSP00000003574	10090.ENSMUSP00000092252	0	0	0	0	0	0	0.65	0.088	0.667
Cyp4f18	Ptgs2	10090.ENSMUSP00000003574	10090.ENSMUSP00000035065	0	0	0	0	0.05	0.046	0.9	0.085	0.906
Dct	Slc7a11	10090.ENSMUSP00000022725	10090.ENSMUSP00000029297	0	0	0	0	0	0	0	0.427	0.427
Dct	Serpinb6e	10090.ENSMUSP00000022725	10090.ENSMUSP00000105904	0	0	0	0	0	0	0	0.464	0.463
Dct	Serpinb3c	10090.ENSMUSP00000022725	10090.ENSMUSP00000027565	0	0	0	0	0	0	0	0.464	0.463
Dct	Edn3	10090.ENSMUSP00000022725	10090.ENSMUSP00000029030	0	0	0	0	0	0	0	0.601	0.601
Dct	Pmel	10090.ENSMUSP00000022725	10090.ENSMUSP00000051869	0	0	0	0	0.4	0	0	0.866	0.916
Degs2	Ugt8a	10090.ENSMUSP00000021691	10090.ENSMUSP00000050852	0	0	0	0	0.089	0	0.9	0.399	0.94
Dhrs9	Stra6	10090.ENSMUSP00000069631	10090.ENSMUSP00000034880	0	0	0	0	0.052	0	0	0.468	0.474
Dnajc6	Shc3	10090.ENSMUSP00000044251	10090.ENSMUSP00000021898	0	0	0	0	0.105	0	0.36	0.068	0.419
Dnajc6	Lpxn	10090.ENSMUSP00000044251	10090.ENSMUSP00000025601	0	0	0	0	0.051	0.131	0.331	0.055	0.408
Dnajc6	Snap91	10090.ENSMUSP00000044251	10090.ENSMUSP00000096096	0	0	0	0	0.272	0.139	0	0.717	0.807
Dnmt3l	Snrpn	10090.ENSMUSP00000121562	10090.ENSMUSP00000096003	0	0	0	0	0	0	0	0.63	0.63
Dynlt1b	Ntrk3	10090.ENSMUSP00000137171	10090.ENSMUSP00000037909	0	0	0	0	0	0.047	0.42	0.048	0.427
Edar	Wnt10b	10090.ENSMUSP00000003312	10090.ENSMUSP00000023732	0	0	0	0	0.061	0	0	0.556	0.565
Edar	Tnf	10090.ENSMUSP00000003312	10090.ENSMUSP00000025263	0	0	0	0	0	0	0	0.753	0.753
Edn3	Krt75	10090.ENSMUSP00000029030	10090.ENSMUSP00000036246	0	0	0	0	0	0	0	0.419	0.419
Edn3	Pmel	10090.ENSMUSP00000029030	10090.ENSMUSP00000051869	0	0	0	0	0	0	0	0.429	0.429
Edn3	Nmu	10090.ENSMUSP00000029030	10090.ENSMUSP00000031146	0	0	0	0	0	0	0.5	0.079	0.519
Edn3	Hcar2	10090.ENSMUSP00000029030	10090.ENSMUSP00000054104	0	0	0	0	0	0.059	0.656	0	0.663
Epgn	Sprr2h	10090.ENSMUSP00000046987	10090.ENSMUSP00000053849	0	0	0	0	0.072	0	0	0.464	0.481
Epgn	Nrg1	10090.ENSMUSP00000046987	10090.ENSMUSP00000073546	0	0	0	0	0	0	0	0.571	0.571
Epsti1	Rsad2	10090.ENSMUSP00000022591	10090.ENSMUSP00000020970	0	0	0	0	0.305	0	0	0.362	0.538
Epsti1	Ms4a6b	10090.ENSMUSP00000022591	10090.ENSMUSP00000124685	0	0	0	0	0.412	0	0	0	0.412
Epsti1	Gm14446	10090.ENSMUSP00000022591	10090.ENSMUSP00000108086	0	0	0	0	0.19	0	0	0.31	0.417
Epsti1	Isg15	10090.ENSMUSP00000022591	10090.ENSMUSP00000082548	0	0	0	0	0.194	0	0	0.33	0.437
Epsti1	Oasl1	10090.ENSMUSP00000022591	10090.ENSMUSP00000031540	0	0	0	0	0.393	0	0	0.154	0.464
Epsti1	Sp100	10090.ENSMUSP00000022591	10090.ENSMUSP00000066399	0	0	0	0	0.407	0	0	0.189	0.498
Epsti1	Oas3	10090.ENSMUSP00000022591	10090.ENSMUSP00000035588	0	0	0	0	0.291	0	0	0.363	0.529
Epsti1	Irf7	10090.ENSMUSP00000022591	10090.ENSMUSP00000026571	0	0	0	0	0.466	0	0	0.172	0.54
Epsti1	Oas2	10090.ENSMUSP00000022591	10090.ENSMUSP00000060082	0	0	0	0	0.286	0	0	0.399	0.553
Epsti1	Lcp2	10090.ENSMUSP00000022591	10090.ENSMUSP00000056621	0	0	0	0	0.557	0	0	0	0.557
Epsti1	Oasl2	10090.ENSMUSP00000022591	10090.ENSMUSP00000031542	0	0	0	0	0.442	0	0	0.268	0.575
Epsti1	Ifi44	10090.ENSMUSP00000022591	10090.ENSMUSP00000029671	0	0	0	0	0.34	0	0	0.424	0.604
Epsti1	Ifit1	10090.ENSMUSP00000022591	10090.ENSMUSP00000099888	0	0	0	0	0.326	0	0	0.479	0.634
Epsti1	Herc6	10090.ENSMUSP00000022591	10090.ENSMUSP00000031817	0	0	0	0	0.217	0.052	0	0.551	0.637
Epsti1	Pyhin1	10090.ENSMUSP00000022591	10090.ENSMUSP00000061900	0	0	0	0	0.639	0	0	0	0.639
Epsti1	Samd9l	10090.ENSMUSP00000022591	10090.ENSMUSP00000112688	0	0	0	0	0.546	0	0	0.398	0.715
Espn	Gjb2	10090.ENSMUSP00000030785	10090.ENSMUSP00000054343	0	0	0	0	0	0	0	0.556	0.556
Espn	Pls1	10090.ENSMUSP00000030785	10090.ENSMUSP00000091317	0	0	0	0	0.062	0.136	0.106	0.834	0.864
Fabp5	Stra6	10090.ENSMUSP00000029046	10090.ENSMUSP00000034880	0	0	0	0	0	0	0	0.469	0.469
Fabp7	Nptx2	10090.ENSMUSP00000020024	10090.ENSMUSP00000071687	0	0	0	0	0.061	0	0	0.454	0.466
Fabp7	Gfap	10090.ENSMUSP00000020024	10090.ENSMUSP00000064691	0	0	0	0	0.121	0	0	0.737	0.759
Fbxo32	Gm5414	10090.ENSMUSP00000022986	10090.ENSMUSP00000059101	0	0	0	0	0	0.433	0	0.045	0.435
Fbxo32	Tnf	10090.ENSMUSP00000022986	10090.ENSMUSP00000025263	0	0	0	0	0	0	0	0.556	0.556
Fcer1g	Il10	10090.ENSMUSP00000078875	10090.ENSMUSP00000016673	0	0	0	0	0.078	0	0	0.497	0.516
Fcer1g	Ly86	10090.ENSMUSP00000078875	10090.ENSMUSP00000021860	0	0	0	0	0.473	0	0	0.278	0.603
Fcer1g	Shc3	10090.ENSMUSP00000078875	10090.ENSMUSP00000021898	0	0	0	0	0	0.237	0.491	0	0.595
Fcer1g	Trem2	10090.ENSMUSP00000078875	10090.ENSMUSP00000024791	0	0	0	0	0.394	0	0	0.864	0.914
Fcer1g	Tnf	10090.ENSMUSP00000078875	10090.ENSMUSP00000025263	0	0	0	0	0.171	0	0	0.552	0.613
Fcer1g	Ms4a6d	10090.ENSMUSP00000078875	10090.ENSMUSP00000025582	0	0	0	0	0.458	0	0	0.09	0.486
Fcer1g	Lpxn	10090.ENSMUSP00000078875	10090.ENSMUSP00000025601	0	0	0	0	0.417	0	0	0	0.417
Fcer1g	Slc15a3	10090.ENSMUSP00000078875	10090.ENSMUSP00000025646	0	0	0	0	0.427	0	0	0.181	0.511
Fcer1g	Msr1	10090.ENSMUSP00000078875	10090.ENSMUSP00000026021	0	0	0	0	0.407	0	0	0.048	0.412
Fcer1g	Slc11a1	10090.ENSMUSP00000078875	10090.ENSMUSP00000027368	0	0	0	0	0.42	0	0	0.203	0.518
Fcer1g	Il1b	10090.ENSMUSP00000078875	10090.ENSMUSP00000028881	0	0	0	0	0.219	0	0	0.4	0.511
Fcer1g	Tyrobp	10090.ENSMUSP00000078875	10090.ENSMUSP00000032800	0	0	0	0	0.891	0	0	0.896	0.988
Fcer1g	Igsf6	10090.ENSMUSP00000078875	10090.ENSMUSP00000039059	0	0	0	0	0.468	0	0	0.125	0.515
Fcer1g	Vsig4	10090.ENSMUSP00000078875	10090.ENSMUSP00000051521	0	0	0	0	0.195	0	0	0.352	0.457
Fcer1g	Lcp2	10090.ENSMUSP00000078875	10090.ENSMUSP00000056621	0	0	0	0	0.483	0	0.877	0.665	0.976
Fcer1g	Tlr7	10090.ENSMUSP00000078875	10090.ENSMUSP00000061853	0	0	0	0	0.306	0	0	0.399	0.565
Fcer1g	Ly9	10090.ENSMUSP00000078875	10090.ENSMUSP00000069319	0	0	0	0	0.271	0	0	0.216	0.404
Fcer1g	Sirpb1a	10090.ENSMUSP00000078875	10090.ENSMUSP00000096807	0	0	0	0	0.105	0	0	0.36	0.403
Fcer1g	Srgn	10090.ENSMUSP00000078875	10090.ENSMUSP00000125622	0	0	0	0	0.341	0	0	0.147	0.414
Fcer1g	Ms4a6c	10090.ENSMUSP00000078875	10090.ENSMUSP00000132425	0	0	0	0	0.454	0	0	0.046	0.457
Fcer1g	Ncf2	10090.ENSMUSP00000078875	10090.ENSMUSP00000140404	0	0	0	0	0.42	0	0	0.166	0.495
Fcer1g	Rgs1	10090.ENSMUSP00000078875	10090.ENSMUSP00000140624	0	0	0	0	0.411	0	0.192	0	0.503
Fcer1g	Plek	10090.ENSMUSP00000078875	10090.ENSMUSP00000099945	0	0	0	0	0.466	0	0	0.248	0.581
Fcer1g	Gm15448	10090.ENSMUSP00000078875	10090.ENSMUSP00000104259	0	0	0	0	0.139	0.131	0	0.497	0.591
Fgfr4	Shc3	10090.ENSMUSP00000005452	10090.ENSMUSP00000021898	0	0	0	0	0	0.199	0.703	0.069	0.759
Fhl2	Stx11	10090.ENSMUSP00000008280	10090.ENSMUSP00000046243	0	0	0	0	0	0	0	0.63	0.63
Fmod	Ncan	10090.ENSMUSP00000035489	10090.ENSMUSP00000002412	0	0	0	0	0	0.067	0.135	0.436	0.505
Fmod	Mmp13	10090.ENSMUSP00000035489	10090.ENSMUSP00000015394	0	0	0	0	0	0.054	0	0.529	0.535
Fmod	Tnf	10090.ENSMUSP00000035489	10090.ENSMUSP00000025263	0	0	0	0	0	0.048	0.21	0.27	0.403
Fmod	Tnmd	10090.ENSMUSP00000035489	10090.ENSMUSP00000033602	0	0	0	0	0.288	0	0	0.748	0.813
Fmod	Pdgfrl	10090.ENSMUSP00000035489	10090.ENSMUSP00000034004	0	0	0	0	0.144	0.131	0	0.337	0.463
Fmod	Osm	10090.ENSMUSP00000035489	10090.ENSMUSP00000074708	0	0	0	0	0	0	0	0.433	0.433
Fmod	Spp1	10090.ENSMUSP00000035489	10090.ENSMUSP00000108367	0	0	0	0	0	0.046	0	0.464	0.466
Fpr3	Plaur	10090.ENSMUSP00000093316	10090.ENSMUSP00000002284	0	0	0	0	0.052	0	0.464	0.526	0.738
Fpr3	Saa3	10090.ENSMUSP00000093316	10090.ENSMUSP00000006956	0	0	0	0	0	0.058	0	0.395	0.405
Fpr3	Il10	10090.ENSMUSP00000093316	10090.ENSMUSP00000016673	0	0	0	0	0	0	0	0.466	0.465
Fpr3	Tnf	10090.ENSMUSP00000093316	10090.ENSMUSP00000025263	0	0	0	0	0	0	0	0.552	0.552
Fpr3	Il1b	10090.ENSMUSP00000093316	10090.ENSMUSP00000028881	0	0	0	0	0	0.046	0	0.55	0.552
Fpr3	Gnao1	10090.ENSMUSP00000093316	10090.ENSMUSP00000114144	0	0	0	0	0	0.176	0.134	0.255	0.421
Frem1	Frem2	10090.ENSMUSP00000071627	10090.ENSMUSP00000088670	0	0	0	0.756	0.084	0.439	0.8	0.985	0.915
Frmd3	Glt8d2	10090.ENSMUSP00000081514	10090.ENSMUSP00000020485	0	0	0	0	0	0	0	0.506	0.506
Frmd3	Ncald	10090.ENSMUSP00000081514	10090.ENSMUSP00000087611	0	0	0	0	0.079	0.041	0	0.438	0.461
Frzb	Mmp13	10090.ENSMUSP00000028389	10090.ENSMUSP00000015394	0	0	0	0	0.062	0	0	0.412	0.425
Frzb	Wnt10b	10090.ENSMUSP00000028389	10090.ENSMUSP00000023732	0	0	0	0	0	0.162	0.227	0.533	0.671
Frzb	Wnt7a	10090.ENSMUSP00000028389	10090.ENSMUSP00000032180	0	0	0	0	0	0.162	0.227	0.581	0.705
Fxyd4	Slc13a3	10090.ENSMUSP00000005114	10090.ENSMUSP00000029208	0	0	0	0	0	0	0	0.446	0.446
Fxyd4	Slc37a2	10090.ENSMUSP00000005114	10090.ENSMUSP00000124569	0	0	0	0	0	0	0	0.469	0.469
Gabra4	Gabrp	10090.ENSMUSP00000031121	10090.ENSMUSP00000020366	0	0	0	0.822	0	0.131	0.54	0.444	0.614
Galnt6	Gcnt1	10090.ENSMUSP00000056705	10090.ENSMUSP00000133935	0	0	0	0	0.062	0	0.65	0.486	0.816
Gfap	Ncan	10090.ENSMUSP00000064691	10090.ENSMUSP00000002412	0	0	0	0	0.178	0.047	0	0.475	0.553
Gfap	Il10	10090.ENSMUSP00000064691	10090.ENSMUSP00000016673	0	0	0	0	0	0	0	0.551	0.551
Gfap	Trem2	10090.ENSMUSP00000064691	10090.ENSMUSP00000024791	0	0	0	0	0.161	0	0	0.474	0.54
Gfap	Tnf	10090.ENSMUSP00000064691	10090.ENSMUSP00000025263	0	0	0	0	0	0	0	0.715	0.715
Gfap	Il1b	10090.ENSMUSP00000064691	10090.ENSMUSP00000028881	0	0	0	0	0	0	0	0.719	0.719
Gfap	Slc6a11	10090.ENSMUSP00000064691	10090.ENSMUSP00000032451	0	0	0	0	0.268	0	0	0.275	0.447
Gfap	Slc6a1	10090.ENSMUSP00000064691	10090.ENSMUSP00000032454	0	0	0	0	0.508	0	0	0.307	0.645
Gfap	Ptgs2	10090.ENSMUSP00000064691	10090.ENSMUSP00000035065	0	0	0	0	0.059	0	0	0.42	0.431
Gfap	Gjb6	10090.ENSMUSP00000064691	10090.ENSMUSP00000035630	0	0	0	0	0.182	0	0	0.496	0.57
Gfap	Ntrk3	10090.ENSMUSP00000064691	10090.ENSMUSP00000037909	0	0	0	0	0.286	0	0	0.341	0.51
Gjb2	Mmp13	10090.ENSMUSP00000054343	10090.ENSMUSP00000015394	0	0	0	0	0	0	0	0.433	0.433
Gjb2	Gjb6	10090.ENSMUSP00000054343	10090.ENSMUSP00000035630	0	0	0	0.978	0.134	0.087	0.54	0.94	0.612
Gjb2	Gjc3	10090.ENSMUSP00000054343	10090.ENSMUSP00000076367	0	0	0	0.827	0.052	0	0.54	0.726	0.601
Gjb6	Hepacam	10090.ENSMUSP00000035630	10090.ENSMUSP00000054105	0	0	0	0	0.186	0	0	0.576	0.64
Gjb6	Gjc3	10090.ENSMUSP00000035630	10090.ENSMUSP00000076367	0	0	0	0.777	0.088	0	0.54	0.81	0.64
Gla	Ugt8a	10090.ENSMUSP00000033621	10090.ENSMUSP00000050852	0	0	0	0	0.061	0	0.9	0.089	0.907
Glipr2	Tmem37	10090.ENSMUSP00000030202	10090.ENSMUSP00000050862	0	0	0	0	0	0	0	0.464	0.463
Gm10722	Stfa3	10090.ENSMUSP00000132394	10090.ENSMUSP00000067445	0	0	0	0	0	0	0	0.718	0.718
Gm11710	Trem2	10090.ENSMUSP00000097811	10090.ENSMUSP00000024791	0	0	0	0	0	0	0.5	0.064	0.511
Gm11710	Treml4	10090.ENSMUSP00000097811	10090.ENSMUSP00000118772	0	0	0	0.655	0.063	0	0.5	0.065	0.515
Gm14446	Rsad2	10090.ENSMUSP00000108086	10090.ENSMUSP00000020970	0	0	0	0	0.38	0	0	0.249	0.514
Gm14446	Oasl1	10090.ENSMUSP00000108086	10090.ENSMUSP00000031540	0	0	0	0	0.296	0.161	0	0.321	0.564
Gm14446	Oasl2	10090.ENSMUSP00000108086	10090.ENSMUSP00000031542	0	0	0	0	0.296	0.161	0	0.24	0.512
Gm14446	Oas1a	10090.ENSMUSP00000108086	10090.ENSMUSP00000079198	0	0	0	0	0.296	0.161	0	0.321	0.564
Gm14446	Isg15	10090.ENSMUSP00000108086	10090.ENSMUSP00000082548	0	0	0	0	0.164	0.161	0	0.284	0.454
Gm14446	Oas1g	10090.ENSMUSP00000108086	10090.ENSMUSP00000083555	0	0	0	0	0.296	0.161	0	0.291	0.544
Gm14446	Pydc4	10090.ENSMUSP00000108086	10090.ENSMUSP00000095070	0	0	0	0	0	0	0	0.4	0.4
Gm14446	Ifit1	10090.ENSMUSP00000108086	10090.ENSMUSP00000099888	0	0	0	0.962	0	0	0.8	0.552	0.804
Gm14446	Trim30b	10090.ENSMUSP00000108086	10090.ENSMUSP00000102444	0	0	0	0	0	0	0	0.513	0.513
Gm28042	Stx11	10090.ENSMUSP00000115498	10090.ENSMUSP00000046243	0	0	0	0	0.119	0.218	0.216	0.071	0.431
Gm28042	Pla2g4d	10090.ENSMUSP00000115498	10090.ENSMUSP00000092252	0	0	0	0.923	0	0	0.5	0.464	0.516
Gm5414	Krt19	10090.ENSMUSP00000059101	10090.ENSMUSP00000007317	0	0	0	0.682	0.064	0.218	0.6	0.13	0.691
Gm5414	Krt84	10090.ENSMUSP00000059101	10090.ENSMUSP00000023720	0	0	0	0.914	0	0	0.5	0	0.499
Gm5414	Krt4	10090.ENSMUSP00000059101	10090.ENSMUSP00000023797	0	0	0	0.941	0	0	0.5	0.049	0.5
Gm5414	Krt75	10090.ENSMUSP00000059101	10090.ENSMUSP00000036246	0	0	0	0.959	0.062	0.051	0.5	0.044	0.516
Gm5414	Krt77	10090.ENSMUSP00000059101	10090.ENSMUSP00000085311	0	0	0	0.928	0.098	0.16	0.5	0	0.588
Gm5414	Krt32	10090.ENSMUSP00000059101	10090.ENSMUSP00000103042	0	0	0	0.64	0.065	0.058	0.6	0	0.617
Gm5414	Krt15	10090.ENSMUSP00000059101	10090.ENSMUSP00000103034	0	0	0	0.701	0.066	0.143	0.6	0.049	0.652
Gm5483	Retnlg	10090.ENSMUSP00000110508	10090.ENSMUSP00000070238	0	0	0	0	0.152	0	0	0.522	0.577
Gm9733	Tyrobp	10090.ENSMUSP00000103998	10090.ENSMUSP00000032800	0	0	0	0	0.203	0	0.8	0	0.833
Gm9733	Hepacam2	10090.ENSMUSP00000103998	10090.ENSMUSP00000058882	0	0	0	0	0	0	0	0.52	0.52
Gnao1	Rgs9	10090.ENSMUSP00000114144	10090.ENSMUSP00000020920	0	0	0	0	0.086	0.232	0.285	0.779	0.874
Gnao1	Shc3	10090.ENSMUSP00000114144	10090.ENSMUSP00000021898	0	0	0	0	0.162	0	0.47	0	0.537
Gnao1	Rgs11	10090.ENSMUSP00000114144	10090.ENSMUSP00000025020	0	0	0	0	0.066	0.232	0.285	0.744	0.851
Gnao1	Slc6a1	10090.ENSMUSP00000114144	10090.ENSMUSP00000032454	0	0	0	0	0.226	0.695	0	0.063	0.759
Gnao1	Gpm6a	10090.ENSMUSP00000114144	10090.ENSMUSP00000033915	0	0	0	0	0.228	0.693	0	0.068	0.76
Gnao1	Hcar2	10090.ENSMUSP00000114144	10090.ENSMUSP00000054104	0	0	0	0	0	0.167	0.134	0.428	0.552
Gnao1	Rgs1	10090.ENSMUSP00000114144	10090.ENSMUSP00000140624	0	0	0	0	0.066	0.234	0.676	0.422	0.848
Gpm6a	Slc6a1	10090.ENSMUSP00000033915	10090.ENSMUSP00000032454	0	0	0	0	0.255	0.699	0	0.114	0.784
Gprasp2	P2ry14	10090.ENSMUSP00000134666	10090.ENSMUSP00000088642	0	0	0	0	0	0	0	0.454	0.454
Grn	Trem2	10090.ENSMUSP00000046340	10090.ENSMUSP00000024791	0	0	0	0	0.069	0	0	0.551	0.564
Grn	Tnf	10090.ENSMUSP00000046340	10090.ENSMUSP00000025263	0	0	0	0	0.062	0	0	0.776	0.781
Grn	Tyrobp	10090.ENSMUSP00000046340	10090.ENSMUSP00000032800	0	0	0	0	0.109	0	0	0.38	0.424
Grn	Oas1g	10090.ENSMUSP00000046340	10090.ENSMUSP00000083555	0	0	0	0	0.065	0.493	0	0.043	0.507
Grn	Hepacam2	10090.ENSMUSP00000046340	10090.ENSMUSP00000058882	0	0	0	0	0	0	0	0.542	0.542
Grn	Slpi	10090.ENSMUSP00000046340	10090.ENSMUSP00000104992	0	0	0	0	0.066	0.274	0	0.844	0.885
Gsta1	Gsta4	10090.ENSMUSP00000096139	10090.ENSMUSP00000034903	0	0	0.354	0.96	0.069	0.372	0.65	0.741	0.786
Gsta4	Upp1	10090.ENSMUSP00000034903	10090.ENSMUSP00000020677	0	0	0	0	0.095	0.4	0	0	0.433
H2-M5	Trem2	10090.ENSMUSP00000131365	10090.ENSMUSP00000024791	0	0	0	0	0	0	0.5	0	0.499
H2-M5	Tyrobp	10090.ENSMUSP00000131365	10090.ENSMUSP00000032800	0	0	0	0	0	0	0.6	0.062	0.608
H2-M5	Lcp2	10090.ENSMUSP00000131365	10090.ENSMUSP00000056621	0	0	0	0	0	0	0.757	0	0.757
Havcr2	Il10	10090.ENSMUSP00000020668	10090.ENSMUSP00000016673	0	0	0	0	0.062	0	0	0.695	0.701
Havcr2	Tyrobp	10090.ENSMUSP00000020668	10090.ENSMUSP00000032800	0	0	0	0	0.313	0	0	0.231	0.449
Havcr2	Lcp2	10090.ENSMUSP00000020668	10090.ENSMUSP00000056621	0	0	0	0	0.334	0.13	0	0.152	0.466
Havcr2	Tlr7	10090.ENSMUSP00000020668	10090.ENSMUSP00000061853	0	0	0	0	0.234	0	0	0.4	0.521
Havcr2	Pmel	10090.ENSMUSP00000020668	10090.ENSMUSP00000051869	0	0	0	0	0	0	0	0.55	0.55
Havcr2	Il1b	10090.ENSMUSP00000020668	10090.ENSMUSP00000028881	0	0	0	0	0.094	0	0	0.549	0.574
Havcr2	Lgmn	10090.ENSMUSP00000020668	10090.ENSMUSP00000021607	0	0	0	0	0.111	0	0	0.639	0.666
Havcr2	Tnf	10090.ENSMUSP00000020668	10090.ENSMUSP00000025263	0	0	0	0	0.095	0	0	0.67	0.688
Hcar2	Il10	10090.ENSMUSP00000054104	10090.ENSMUSP00000016673	0	0	0	0	0.071	0	0	0.468	0.484
Hcar2	Slc5a8	10090.ENSMUSP00000054104	10090.ENSMUSP00000020255	0	0	0	0	0	0.042	0	0.738	0.739
Hcar2	Irg1	10090.ENSMUSP00000054104	10090.ENSMUSP00000022722	0	0	0	0	0.407	0	0	0.197	0.503
Hcar2	Tnf	10090.ENSMUSP00000054104	10090.ENSMUSP00000025263	0	0	0	0	0.255	0	0	0.431	0.558
Hcar2	Il1b	10090.ENSMUSP00000054104	10090.ENSMUSP00000028881	0	0	0	0	0.421	0.046	0	0.399	0.639
Hcar2	Nlrp3	10090.ENSMUSP00000054104	10090.ENSMUSP00000098707	0	0	0	0	0.161	0	0	0.401	0.476
Hdc	Tnf	10090.ENSMUSP00000028838	10090.ENSMUSP00000025263	0	0	0	0	0.061	0	0	0.399	0.411
Hepacam	Mlc1	10090.ENSMUSP00000054105	10090.ENSMUSP00000047667	0	0	0	0	0.211	0	0	0.372	0.483
Hepacam2	Samd9l	10090.ENSMUSP00000058882	10090.ENSMUSP00000112688	0	0	0	0	0	0	0	0.837	0.837
Herc6	Rsad2	10090.ENSMUSP00000031817	10090.ENSMUSP00000020970	0	0	0	0	0.68	0	0	0.62	0.873
Herc6	Irf7	10090.ENSMUSP00000031817	10090.ENSMUSP00000026571	0	0	0	0	0.637	0.045	0	0.527	0.822
Herc6	Ifi44	10090.ENSMUSP00000031817	10090.ENSMUSP00000029671	0	0	0	0	0.736	0	0	0.615	0.894
Herc6	Oasl1	10090.ENSMUSP00000031817	10090.ENSMUSP00000031540	0	0	0	0	0.568	0.161	0	0.256	0.707
Herc6	Oasl2	10090.ENSMUSP00000031817	10090.ENSMUSP00000031542	0	0	0	0	0.583	0.161	0	0.573	0.837
Herc6	Samhd1	10090.ENSMUSP00000031817	10090.ENSMUSP00000059717	0	0	0	0	0.22	0	0	0.3	0.431
Herc6	Oas1a	10090.ENSMUSP00000031817	10090.ENSMUSP00000079198	0	0	0	0	0.204	0.161	0	0.222	0.435
Herc6	Oas1g	10090.ENSMUSP00000031817	10090.ENSMUSP00000083555	0	0	0	0	0.236	0.161	0	0.199	0.442
Herc6	Pyhin1	10090.ENSMUSP00000031817	10090.ENSMUSP00000061900	0	0	0	0	0.404	0.068	0	0.119	0.468
Herc6	Sp100	10090.ENSMUSP00000031817	10090.ENSMUSP00000066399	0	0	0	0	0.416	0.047	0.124	0.185	0.55
Herc6	Samd9l	10090.ENSMUSP00000031817	10090.ENSMUSP00000112688	0	0	0	0	0.37	0	0	0.34	0.567
Herc6	Oas2	10090.ENSMUSP00000031817	10090.ENSMUSP00000060082	0	0	0	0	0.291	0	0	0.581	0.69
Herc6	Xaf1	10090.ENSMUSP00000031817	10090.ENSMUSP00000123011	0	0	0	0	0.503	0	0	0.466	0.723
Herc6	Oas3	10090.ENSMUSP00000031817	10090.ENSMUSP00000035588	0	0	0	0	0.362	0	0	0.586	0.724
Herc6	Ifit1	10090.ENSMUSP00000031817	10090.ENSMUSP00000099888	0	0	0	0	0.749	0.102	0	0.618	0.906
Herc6	Isg15	10090.ENSMUSP00000031817	10090.ENSMUSP00000082548	0	0	0	0	0.657	0.205	0	0.782	0.935
Hp	Saa3	10090.ENSMUSP00000074436	10090.ENSMUSP00000006956	0	0	0	0	0.061	0	0	0.489	0.5
Hp	Il10	10090.ENSMUSP00000074436	10090.ENSMUSP00000016673	0	0	0	0	0	0	0	0.598	0.598
Hp	Serpina3n	10090.ENSMUSP00000074436	10090.ENSMUSP00000021506	0	0	0	0	0.134	0.11	0.129	0.676	0.753
Hp	Tnf	10090.ENSMUSP00000074436	10090.ENSMUSP00000025263	0	0	0	0	0	0.046	0	0.643	0.645
Hp	Slc11a1	10090.ENSMUSP00000074436	10090.ENSMUSP00000027368	0	0	0	0	0.068	0	0	0.402	0.418
Hp	Il1b	10090.ENSMUSP00000074436	10090.ENSMUSP00000028881	0	0	0	0	0.082	0.049	0	0.552	0.574
Hp	Vcam1	10090.ENSMUSP00000074436	10090.ENSMUSP00000029574	0	0	0	0	0	0.047	0	0.402	0.405
Hp	Lcn2	10090.ENSMUSP00000074436	10090.ENSMUSP00000053962	0	0	0	0	0.167	0.044	0	0.54	0.601
Hp	S100a8	10090.ENSMUSP00000074436	10090.ENSMUSP00000064385	0	0	0	0	0.137	0	0	0.497	0.548
Hp	S100a9	10090.ENSMUSP00000074436	10090.ENSMUSP00000112843	0	0	0	0	0.155	0	0	0.373	0.448
Hp	Serpina3b	10090.ENSMUSP00000074436	10090.ENSMUSP00000082127	0	0	0	0	0.093	0.11	0.129	0.707	0.767
Ier3	Tnf	10090.ENSMUSP00000003635	10090.ENSMUSP00000025263	0	0	0	0	0.144	0	0	0.395	0.459
Ier3	Slc37a2	10090.ENSMUSP00000003635	10090.ENSMUSP00000124569	0	0	0	0	0	0	0	0.5	0.499
Ifi27l2a	Rsad2	10090.ENSMUSP00000054698	10090.ENSMUSP00000020970	0	0	0	0	0.213	0	0	0.325	0.446
Ifi27l2a	Irf7	10090.ENSMUSP00000054698	10090.ENSMUSP00000026571	0	0	0	0	0.619	0	0	0.298	0.721
Ifi27l2a	Ifi44	10090.ENSMUSP00000054698	10090.ENSMUSP00000029671	0	0	0	0	0.406	0	0	0.464	0.668
Ifi27l2a	Oasl2	10090.ENSMUSP00000054698	10090.ENSMUSP00000031542	0	0	0	0	0.624	0	0	0.305	0.727
Ifi27l2a	Lgals3bp	10090.ENSMUSP00000054698	10090.ENSMUSP00000035579	0	0	0	0	0.599	0	0	0.129	0.635
Ifi27l2a	Samd9l	10090.ENSMUSP00000054698	10090.ENSMUSP00000112688	0	0	0	0	0.326	0	0	0.197	0.435
Ifi27l2a	Isg15	10090.ENSMUSP00000054698	10090.ENSMUSP00000082548	0	0	0	0	0.197	0	0	0.351	0.456
Ifi27l2a	Oas1g	10090.ENSMUSP00000054698	10090.ENSMUSP00000083555	0	0	0	0	0.204	0	0	0.354	0.463
Ifi27l2a	Oas1a	10090.ENSMUSP00000054698	10090.ENSMUSP00000079198	0	0	0	0	0.161	0	0	0.39	0.466
Ifi27l2a	Oas2	10090.ENSMUSP00000054698	10090.ENSMUSP00000060082	0	0	0	0	0.41	0	0	0.197	0.505
Ifi27l2a	Ifit1	10090.ENSMUSP00000054698	10090.ENSMUSP00000099888	0	0	0	0	0.333	0	0	0.468	0.629
Ifi44	Slfn4	10090.ENSMUSP00000029671	10090.ENSMUSP00000000208	0	0	0	0	0.347	0	0	0.261	0.497
Ifi44	Rsad2	10090.ENSMUSP00000029671	10090.ENSMUSP00000020970	0	0	0	0	0.8	0	0	0.722	0.942
Ifi44	Ifitm3	10090.ENSMUSP00000029671	10090.ENSMUSP00000026565	0	0	0	0	0.188	0	0	0.562	0.629
Ifi44	Irf7	10090.ENSMUSP00000029671	10090.ENSMUSP00000026571	0	0	0	0	0.875	0	0	0.668	0.956
Ifi44	Samhd1	10090.ENSMUSP00000029671	10090.ENSMUSP00000059717	0	0	0	0	0.278	0	0	0.297	0.471
Ifi44	Lgals3bp	10090.ENSMUSP00000029671	10090.ENSMUSP00000035579	0	0	0	0	0.419	0	0	0.25	0.546
Ifi44	Oas1a	10090.ENSMUSP00000029671	10090.ENSMUSP00000079198	0	0	0	0	0.342	0	0	0.394	0.584
Ifi44	Sp100	10090.ENSMUSP00000029671	10090.ENSMUSP00000066399	0	0	0	0	0.522	0	0	0.194	0.599
Ifi44	Oas1g	10090.ENSMUSP00000029671	10090.ENSMUSP00000083555	0	0	0	0	0.427	0	0	0.491	0.696
Ifi44	Samd9l	10090.ENSMUSP00000029671	10090.ENSMUSP00000112688	0	0	0	0	0.469	0	0	0.547	0.749
Ifi44	Xaf1	10090.ENSMUSP00000029671	10090.ENSMUSP00000123011	0	0	0	0	0.578	0	0	0.528	0.792
Ifi44	Oas3	10090.ENSMUSP00000029671	10090.ENSMUSP00000035588	0	0	0	0	0.438	0	0	0.691	0.819
Ifi44	Oasl1	10090.ENSMUSP00000029671	10090.ENSMUSP00000031540	0	0	0	0	0.736	0	0	0.525	0.869
Ifi44	Isg15	10090.ENSMUSP00000029671	10090.ENSMUSP00000082548	0	0	0	0	0.583	0	0	0.71	0.874
Ifi44	Oas2	10090.ENSMUSP00000029671	10090.ENSMUSP00000060082	0	0	0	0	0.696	0	0	0.725	0.913
Ifi44	Oasl2	10090.ENSMUSP00000029671	10090.ENSMUSP00000031542	0	0	0	0	0.827	0	0	0.715	0.948
Ifi44	Ifit1	10090.ENSMUSP00000029671	10090.ENSMUSP00000099888	0	0	0	0	0.839	0	0	0.814	0.968
Ifit1	Slfn4	10090.ENSMUSP00000099888	10090.ENSMUSP00000000208	0	0	0	0	0.283	0.046	0	0.245	0.438
Ifit1	Rsad2	10090.ENSMUSP00000099888	10090.ENSMUSP00000020970	0	0	0	0	0.838	0	0	0.837	0.972
Ifit1	Irg1	10090.ENSMUSP00000099888	10090.ENSMUSP00000022722	0	0	0	0	0.191	0	0	0.428	0.517
Ifit1	Tnf	10090.ENSMUSP00000099888	10090.ENSMUSP00000025263	0	0	0	0	0.094	0	0	0.552	0.576
Ifit1	Ifitm3	10090.ENSMUSP00000099888	10090.ENSMUSP00000026565	0	0	0	0	0.187	0	0	0.672	0.722
Ifit1	Irf7	10090.ENSMUSP00000099888	10090.ENSMUSP00000026571	0	0	0	0	0.732	0	0	0.815	0.948
Ifit1	Il1b	10090.ENSMUSP00000099888	10090.ENSMUSP00000028881	0	0	0	0	0.16	0	0	0.492	0.555
Ifit1	Oasl1	10090.ENSMUSP00000099888	10090.ENSMUSP00000031540	0	0	0	0	0.762	0.161	0	0.631	0.92
Ifit1	Oasl2	10090.ENSMUSP00000099888	10090.ENSMUSP00000031542	0	0	0	0	0.841	0.161	0	0.765	0.966
Ifit1	Lgals3bp	10090.ENSMUSP00000099888	10090.ENSMUSP00000035579	0	0	0	0	0.449	0	0	0.24	0.563
Ifit1	Oas3	10090.ENSMUSP00000099888	10090.ENSMUSP00000035588	0	0	0	0	0.291	0	0	0.705	0.782
Ifit1	Samhd1	10090.ENSMUSP00000099888	10090.ENSMUSP00000059717	0	0	0	0	0.244	0	0	0.486	0.595
Ifit1	Oas2	10090.ENSMUSP00000099888	10090.ENSMUSP00000060082	0	0	0	0	0.6	0.694	0	0.746	0.966
Ifit1	Tlr7	10090.ENSMUSP00000099888	10090.ENSMUSP00000061853	0	0	0	0	0.071	0.08	0	0.591	0.62
Ifit1	Pyhin1	10090.ENSMUSP00000099888	10090.ENSMUSP00000061900	0	0	0	0	0.239	0.048	0	0.24	0.402
Ifit1	Sp100	10090.ENSMUSP00000099888	10090.ENSMUSP00000066399	0	0	0	0	0.411	0	0	0.305	0.573
Ifit1	Oas1a	10090.ENSMUSP00000099888	10090.ENSMUSP00000079198	0	0	0	0	0.443	0.161	0	0.6	0.797
Ifit1	Isg15	10090.ENSMUSP00000099888	10090.ENSMUSP00000082548	0	0	0	0	0.481	0.161	0	0.851	0.929
Ifit1	Oas1g	10090.ENSMUSP00000099888	10090.ENSMUSP00000083555	0	0	0	0	0.503	0.161	0	0.653	0.842
Ifit1	Tlr8	10090.ENSMUSP00000099888	10090.ENSMUSP00000107793	0	0	0	0	0.054	0.08	0	0.45	0.48
Ifit1	Xaf1	10090.ENSMUSP00000099888	10090.ENSMUSP00000123011	0	0	0	0	0.237	0.046	0	0.498	0.603
Ifit1	Samd9l	10090.ENSMUSP00000099888	10090.ENSMUSP00000112688	0	0	0	0	0.503	0	0	0.372	0.674
Ifitm3	Rsad2	10090.ENSMUSP00000026565	10090.ENSMUSP00000020970	0	0	0	0	0.173	0	0	0.724	0.762
Ifitm3	Spp1	10090.ENSMUSP00000026565	10090.ENSMUSP00000108367	0	0	0	0	0.104	0.169	0	0.269	0.408
Ifitm3	Oas1g	10090.ENSMUSP00000026565	10090.ENSMUSP00000083555	0	0	0	0	0.141	0	0	0.348	0.416
Ifitm3	Oasl1	10090.ENSMUSP00000026565	10090.ENSMUSP00000031540	0	0	0	0	0.175	0	0	0.422	0.503
Ifitm3	Samhd1	10090.ENSMUSP00000026565	10090.ENSMUSP00000059717	0	0	0	0	0.089	0	0	0.482	0.508
Ifitm3	Lgals3bp	10090.ENSMUSP00000026565	10090.ENSMUSP00000035579	0	0	0	0	0.42	0	0	0.236	0.538
Ifitm3	Oas3	10090.ENSMUSP00000026565	10090.ENSMUSP00000035588	0	0	0	0	0.079	0	0	0.543	0.562
Ifitm3	Oas2	10090.ENSMUSP00000026565	10090.ENSMUSP00000060082	0	0	0	0	0.215	0	0	0.568	0.647
Ifitm3	Oasl2	10090.ENSMUSP00000026565	10090.ENSMUSP00000031542	0	0	0	0	0.233	0	0	0.608	0.686
Ifitm3	Irf7	10090.ENSMUSP00000026565	10090.ENSMUSP00000026571	0	0	0	0	0.265	0	0	0.633	0.718
Ifitm3	Isg15	10090.ENSMUSP00000026565	10090.ENSMUSP00000082548	0	0	0	0	0.218	0	0	0.684	0.743
Igsf6	Ncf1	10090.ENSMUSP00000039059	10090.ENSMUSP00000016094	0	0	0	0	0.416	0	0	0	0.416
Igsf6	Ly86	10090.ENSMUSP00000039059	10090.ENSMUSP00000021860	0	0	0	0	0.442	0	0	0.165	0.514
Igsf6	Ms4a6d	10090.ENSMUSP00000039059	10090.ENSMUSP00000025582	0	0	0	0	0.546	0	0	0.303	0.67
Igsf6	Slc15a3	10090.ENSMUSP00000039059	10090.ENSMUSP00000025646	0	0	0	0	0.421	0	0	0.194	0.513
Igsf6	Msr1	10090.ENSMUSP00000039059	10090.ENSMUSP00000026021	0	0	0	0	0.425	0	0	0.148	0.489
Igsf6	Slc11a1	10090.ENSMUSP00000039059	10090.ENSMUSP00000027368	0	0	0	0	0.531	0	0	0.139	0.579
Igsf6	Il1b	10090.ENSMUSP00000039059	10090.ENSMUSP00000028881	0	0	0	0	0.416	0	0	0.067	0.432
Igsf6	Tfec	10090.ENSMUSP00000039059	10090.ENSMUSP00000031533	0	0	0	0	0.415	0	0	0.068	0.432
Igsf6	Tyrobp	10090.ENSMUSP00000039059	10090.ENSMUSP00000032800	0	0	0	0	0.688	0	0	0.09	0.704
Igsf6	Rgs1	10090.ENSMUSP00000039059	10090.ENSMUSP00000140624	0	0	0	0	0.299	0	0	0.222	0.431
Igsf6	Ms4a7	10090.ENSMUSP00000039059	10090.ENSMUSP00000064534	0	0	0	0	0.421	0	0	0.068	0.437
Igsf6	Ms4a6b	10090.ENSMUSP00000039059	10090.ENSMUSP00000124685	0	0	0	0	0.433	0	0	0.099	0.467
Igsf6	Treml4	10090.ENSMUSP00000039059	10090.ENSMUSP00000118772	0	0	0	0	0.476	0	0	0.047	0.479
Igsf6	Ncf2	10090.ENSMUSP00000039059	10090.ENSMUSP00000140404	0	0	0	0	0.533	0	0	0.044	0.534
Igsf6	Plek	10090.ENSMUSP00000039059	10090.ENSMUSP00000099945	0	0	0	0	0.57	0	0	0.052	0.575
Igsf6	Tlr7	10090.ENSMUSP00000039059	10090.ENSMUSP00000061853	0	0	0	0	0.644	0	0	0.063	0.652
Igsf6	Ms4a6c	10090.ENSMUSP00000039059	10090.ENSMUSP00000132425	0	0	0	0	0.616	0	0	0.152	0.661
Igsf6	Lcp2	10090.ENSMUSP00000039059	10090.ENSMUSP00000056621	0	0	0	0	0.667	0	0	0	0.667
Il10	Saa3	10090.ENSMUSP00000016673	10090.ENSMUSP00000006956	0	0	0	0	0	0	0	0.461	0.461
Il10	Timp1	10090.ENSMUSP00000016673	10090.ENSMUSP00000009530	0	0	0	0	0.062	0	0	0.665	0.672
Il10	Mmp13	10090.ENSMUSP00000016673	10090.ENSMUSP00000015394	0	0	0	0	0.069	0	0	0.542	0.556
Il10	Ncf1	10090.ENSMUSP00000016673	10090.ENSMUSP00000016094	0	0	0	0	0.082	0	0	0.4	0.425
Il10	Trem3	10090.ENSMUSP00000016673	10090.ENSMUSP00000044478	0	0	0	0	0.061	0	0	0.387	0.4
Il10	Isg15	10090.ENSMUSP00000016673	10090.ENSMUSP00000082548	0	0	0	0	0	0	0	0.4	0.4
Il10	Slpi	10090.ENSMUSP00000016673	10090.ENSMUSP00000104992	0	0	0	0	0.052	0	0	0.399	0.405
Il10	Irg1	10090.ENSMUSP00000016673	10090.ENSMUSP00000022722	0	0	0	0	0.185	0	0	0.324	0.425
Il10	Ptges	10090.ENSMUSP00000016673	10090.ENSMUSP00000099916	0	0	0	0	0	0	0	0.435	0.435
Il10	S100a8	10090.ENSMUSP00000016673	10090.ENSMUSP00000064385	0	0	0	0	0.061	0	0	0.437	0.448
Il10	Mmp10	10090.ENSMUSP00000016673	10090.ENSMUSP00000034488	0	0	0	0	0.051	0	0	0.448	0.454
Il10	Thbs1	10090.ENSMUSP00000016673	10090.ENSMUSP00000044903	0	0	0	0	0	0	0	0.464	0.463
Il10	Pmel	10090.ENSMUSP00000016673	10090.ENSMUSP00000051869	0	0	0	0	0	0	0	0.464	0.463
Il10	Slc11a1	10090.ENSMUSP00000016673	10090.ENSMUSP00000027368	0	0	0	0	0.062	0	0	0.463	0.474
Il10	Tyrobp	10090.ENSMUSP00000016673	10090.ENSMUSP00000032800	0	0	0	0	0.062	0	0	0.464	0.475
Il10	Siglec1	10090.ENSMUSP00000016673	10090.ENSMUSP00000028794	0	0	0	0	0.061	0	0	0.468	0.479
Il10	Trem2	10090.ENSMUSP00000016673	10090.ENSMUSP00000024791	0	0	0	0	0	0	0	0.524	0.524
Il10	Osm	10090.ENSMUSP00000016673	10090.ENSMUSP00000074708	0	0	0	0	0.079	0	0	0.513	0.532
Il10	Il1f8	10090.ENSMUSP00000016673	10090.ENSMUSP00000028363	0	0	0	0	0.062	0	0	0.524	0.535
Il10	Il1f6	10090.ENSMUSP00000016673	10090.ENSMUSP00000028361	0	0	0	0	0.062	0	0	0.542	0.552
Il10	Lcn2	10090.ENSMUSP00000016673	10090.ENSMUSP00000053962	0	0	0	0	0	0	0	0.555	0.555
Il10	Msr1	10090.ENSMUSP00000016673	10090.ENSMUSP00000026021	0	0	0	0	0.073	0	0	0.555	0.57
Il10	Spp1	10090.ENSMUSP00000016673	10090.ENSMUSP00000108367	0	0	0	0	0	0	0	0.583	0.583
Il10	Irf7	10090.ENSMUSP00000016673	10090.ENSMUSP00000026571	0	0	0	0	0	0	0	0.59	0.59
Il10	Stat4	10090.ENSMUSP00000016673	10090.ENSMUSP00000027277	0	0	0	0	0	0.044	0	0.644	0.645
Il10	Tlr8	10090.ENSMUSP00000016673	10090.ENSMUSP00000107793	0	0	0	0	0.088	0	0	0.647	0.665
Il10	Nlrp3	10090.ENSMUSP00000016673	10090.ENSMUSP00000098707	0	0	0	0	0.089	0	0	0.692	0.707
Il10	Vcam1	10090.ENSMUSP00000016673	10090.ENSMUSP00000029574	0	0	0	0	0.052	0	0	0.717	0.72
Il10	Ptgs2	10090.ENSMUSP00000016673	10090.ENSMUSP00000035065	0	0	0	0	0.071	0	0	0.755	0.763
Il10	Tlr7	10090.ENSMUSP00000016673	10090.ENSMUSP00000061853	0	0	0	0	0.078	0	0	0.76	0.769
Il10	Serpinb6e	10090.ENSMUSP00000016673	10090.ENSMUSP00000105904	0	0	0	0	0	0	0	0.815	0.815
Il10	Serpinb3c	10090.ENSMUSP00000016673	10090.ENSMUSP00000027565	0	0	0	0	0	0	0	0.815	0.815
Il10	Il1b	10090.ENSMUSP00000016673	10090.ENSMUSP00000028881	0	0	0	0	0.118	0	0	0.958	0.961
Il10	Tnf	10090.ENSMUSP00000016673	10090.ENSMUSP00000025263	0	0	0	0	0.149	0	0	0.958	0.963
Il1b	Plaur	10090.ENSMUSP00000028881	10090.ENSMUSP00000002284	0	0	0	0	0.265	0	0	0.358	0.508
Il1b	Saa3	10090.ENSMUSP00000028881	10090.ENSMUSP00000006956	0	0	0	0	0.229	0	0	0.539	0.63
Il1b	Timp1	10090.ENSMUSP00000028881	10090.ENSMUSP00000009530	0	0	0	0	0.113	0	0	0.719	0.74
Il1b	Mmp13	10090.ENSMUSP00000028881	10090.ENSMUSP00000015394	0	0	0	0	0.119	0	0	0.8	0.816
Il1b	Ncf1	10090.ENSMUSP00000028881	10090.ENSMUSP00000016094	0	0	0	0	0.171	0	0	0.584	0.64
Il1b	Rsad2	10090.ENSMUSP00000028881	10090.ENSMUSP00000020970	0	0	0	0	0.203	0	0	0.415	0.513
Il1b	Serpina3n	10090.ENSMUSP00000028881	10090.ENSMUSP00000021506	0	0	0	0	0	0	0	0.403	0.403
Il1b	Irg1	10090.ENSMUSP00000028881	10090.ENSMUSP00000022722	0	0	0	0	0.811	0	0	0.436	0.888
Il1b	Ripk3	10090.ENSMUSP00000028881	10090.ENSMUSP00000022830	0	0	0	0	0.066	0.433	0.131	0.556	0.768
Il1b	Trem2	10090.ENSMUSP00000028881	10090.ENSMUSP00000024791	0	0	0	0	0.094	0	0	0.59	0.612
Il1b	Tnf	10090.ENSMUSP00000028881	10090.ENSMUSP00000025263	0	0	0	0	0.638	0	0	0.93	0.973
Il1b	Slc15a3	10090.ENSMUSP00000028881	10090.ENSMUSP00000025646	0	0	0	0	0.402	0	0	0.104	0.441
Il1b	Msr1	10090.ENSMUSP00000028881	10090.ENSMUSP00000026021	0	0	0	0	0.212	0	0	0.411	0.516
Il1b	Irf7	10090.ENSMUSP00000028881	10090.ENSMUSP00000026571	0	0	0	0	0.137	0	0	0.644	0.68
Il1b	Slc11a1	10090.ENSMUSP00000028881	10090.ENSMUSP00000027368	0	0	0	0	0.157	0	0	0.363	0.44
Il1b	Serpinb3c	10090.ENSMUSP00000028881	10090.ENSMUSP00000027565	0	0	0	0	0	0	0	0.698	0.698
Il1b	Il1f6	10090.ENSMUSP00000028881	10090.ENSMUSP00000028361	0	0	0	0	0.069	0	0	0.621	0.632
Il1b	Siglec1	10090.ENSMUSP00000028881	10090.ENSMUSP00000028794	0	0	0	0	0.079	0	0	0.393	0.417
Il1b	Nrg1	10090.ENSMUSP00000028881	10090.ENSMUSP00000073546	0	0	0	0	0	0	0	0.4	0.4
Il1b	Srgn	10090.ENSMUSP00000028881	10090.ENSMUSP00000125622	0	0	0	0	0.265	0	0	0.303	0.467
Il1b	Thbs1	10090.ENSMUSP00000028881	10090.ENSMUSP00000044903	0	0	0	0	0.071	0	0	0.492	0.507
Il1b	Slpi	10090.ENSMUSP00000028881	10090.ENSMUSP00000104992	0	0	0	0	0.126	0	0	0.468	0.515
Il1b	S100a9	10090.ENSMUSP00000028881	10090.ENSMUSP00000112843	0	0	0	0	0.235	0	0	0.431	0.547
Il1b	Ncf2	10090.ENSMUSP00000028881	10090.ENSMUSP00000140404	0	0	0	0	0.195	0	0	0.464	0.55
Il1b	Isg15	10090.ENSMUSP00000028881	10090.ENSMUSP00000082548	0	0	0	0	0.134	0.046	0	0.516	0.565
Il1b	Tyrobp	10090.ENSMUSP00000028881	10090.ENSMUSP00000032800	0	0	0	0	0.248	0	0	0.464	0.58
Il1b	S100a8	10090.ENSMUSP00000028881	10090.ENSMUSP00000064385	0	0	0	0	0.237	0	0	0.512	0.612
Il1b	Spp1	10090.ENSMUSP00000028881	10090.ENSMUSP00000108367	0	0	0	0	0.062	0	0	0.62	0.628
Il1b	Mmp10	10090.ENSMUSP00000028881	10090.ENSMUSP00000034488	0	0	0	0	0.071	0	0	0.636	0.647
Il1b	Ptges	10090.ENSMUSP00000028881	10090.ENSMUSP00000099916	0	0	0	0	0.089	0	0	0.629	0.647
Il1b	Serpinb6e	10090.ENSMUSP00000028881	10090.ENSMUSP00000105904	0	0	0	0	0.052	0	0	0.698	0.701
Il1b	Tlr8	10090.ENSMUSP00000028881	10090.ENSMUSP00000107793	0	0	0	0	0.149	0	0	0.665	0.703
Il1b	Lcn2	10090.ENSMUSP00000028881	10090.ENSMUSP00000053962	0	0	0	0	0.177	0	0	0.665	0.712
Il1b	Tlr7	10090.ENSMUSP00000028881	10090.ENSMUSP00000061853	0	0	0	0	0.139	0	0	0.779	0.802
Il1b	Vcam1	10090.ENSMUSP00000028881	10090.ENSMUSP00000029574	0	0	0	0	0.099	0	0	0.831	0.841
Il1b	Osm	10090.ENSMUSP00000028881	10090.ENSMUSP00000074708	0	0	0	0	0.205	0	0	0.84	0.868
Il1b	Ptgs2	10090.ENSMUSP00000028881	10090.ENSMUSP00000035065	0	0	0	0	0.31	0	0	0.863	0.902
Il1b	Nlrp3	10090.ENSMUSP00000028881	10090.ENSMUSP00000098707	0	0	0	0	0.231	0	0.8	0.908	0.984
Il1f6	Mmp13	10090.ENSMUSP00000028361	10090.ENSMUSP00000015394	0	0	0	0	0.062	0	0	0.496	0.507
Il1f6	Tnf	10090.ENSMUSP00000028361	10090.ENSMUSP00000025263	0	0	0	0	0.09	0	0	0.724	0.738
Il1f6	Serpinb3a	10090.ENSMUSP00000028361	10090.ENSMUSP00000027567	0	0	0	0	0.088	0	0	0.43	0.457
Il1f6	Vcam1	10090.ENSMUSP00000028361	10090.ENSMUSP00000029574	0	0	0	0	0	0	0	0.405	0.405
Il1f6	Sprr2d	10090.ENSMUSP00000028361	10090.ENSMUSP00000039821	0	0	0	0	0.184	0	0	0.301	0.405
Il1f6	Ptgs2	10090.ENSMUSP00000028361	10090.ENSMUSP00000035065	0	0	0	0	0.057	0	0	0.547	0.555
Il1f6	Il1f8	10090.ENSMUSP00000028361	10090.ENSMUSP00000028363	0	0	0	0.862	0.114	0	0.65	0.888	0.716
Il1f8	Mmp13	10090.ENSMUSP00000028363	10090.ENSMUSP00000015394	0	0	0	0	0	0	0	0.425	0.425
Il1f8	Tnf	10090.ENSMUSP00000028363	10090.ENSMUSP00000025263	0	0	0	0	0.063	0	0	0.726	0.732
Il1f8	Serpinb3a	10090.ENSMUSP00000028363	10090.ENSMUSP00000027567	0	0	0	0	0.069	0	0	0.386	0.403
Il1f8	Stfa3	10090.ENSMUSP00000028363	10090.ENSMUSP00000067445	0	0	0	0	0.077	0	0	0.378	0.401
Il1f8	Ptgs2	10090.ENSMUSP00000028363	10090.ENSMUSP00000035065	0	0	0	0	0	0	0	0.51	0.51
Irf7	Rsad2	10090.ENSMUSP00000026571	10090.ENSMUSP00000020970	0	0	0	0	0.809	0.433	0	0.814	0.978
Irf7	Irg1	10090.ENSMUSP00000026571	10090.ENSMUSP00000022722	0	0	0	0	0.204	0	0	0.35	0.46
Irf7	Tnf	10090.ENSMUSP00000026571	10090.ENSMUSP00000025263	0	0	0	0	0.115	0	0	0.697	0.721
Irf7	Pyhin1	10090.ENSMUSP00000026571	10090.ENSMUSP00000061900	0	0	0	0	0.267	0	0	0.223	0.406
Irf7	Nlrp3	10090.ENSMUSP00000026571	10090.ENSMUSP00000098707	0	0	0	0	0.087	0	0	0.501	0.525
Irf7	Samd9l	10090.ENSMUSP00000026571	10090.ENSMUSP00000112688	0	0	0	0	0.458	0	0	0.188	0.541
Irf7	Stat4	10090.ENSMUSP00000026571	10090.ENSMUSP00000027277	0	0	0	0	0.065	0	0	0.585	0.595
Irf7	Xaf1	10090.ENSMUSP00000026571	10090.ENSMUSP00000123011	0	0	0	0	0.368	0	0	0.407	0.609
Irf7	Samhd1	10090.ENSMUSP00000026571	10090.ENSMUSP00000059717	0	0	0	0	0.336	0	0	0.494	0.65
Irf7	Tlr8	10090.ENSMUSP00000026571	10090.ENSMUSP00000107793	0	0	0	0	0.092	0	0	0.705	0.721
Irf7	Sp100	10090.ENSMUSP00000026571	10090.ENSMUSP00000066399	0	0	0	0	0.608	0	0	0.399	0.754
Irf7	Lgals3bp	10090.ENSMUSP00000026571	10090.ENSMUSP00000035579	0	0	0	0	0.77	0	0	0.239	0.817
Irf7	Oas1a	10090.ENSMUSP00000026571	10090.ENSMUSP00000079198	0	0	0	0	0.552	0	0	0.632	0.828
Irf7	Oas3	10090.ENSMUSP00000026571	10090.ENSMUSP00000035588	0	0	0	0	0.541	0	0	0.645	0.83
Irf7	Oas1g	10090.ENSMUSP00000026571	10090.ENSMUSP00000083555	0	0	0	0	0.568	0	0	0.653	0.844
Irf7	Tlr7	10090.ENSMUSP00000026571	10090.ENSMUSP00000061853	0	0	0	0	0.124	0	0	0.863	0.875
Irf7	Spp1	10090.ENSMUSP00000026571	10090.ENSMUSP00000108367	0	0	0	0	0	0	0.8	0.445	0.884
Irf7	Oas2	10090.ENSMUSP00000026571	10090.ENSMUSP00000060082	0	0	0	0	0.798	0	0	0.707	0.938
Irf7	Oasl1	10090.ENSMUSP00000026571	10090.ENSMUSP00000031540	0	0	0	0	0.877	0	0	0.601	0.949
Irf7	Isg15	10090.ENSMUSP00000026571	10090.ENSMUSP00000082548	0	0	0	0	0.674	0	0	0.854	0.95
Irf7	Oasl2	10090.ENSMUSP00000026571	10090.ENSMUSP00000031542	0	0	0	0	0.842	0	0	0.723	0.954
Irg1	Slfn4	10090.ENSMUSP00000022722	10090.ENSMUSP00000000208	0	0	0	0	0.407	0	0	0	0.407
Irg1	Saa3	10090.ENSMUSP00000022722	10090.ENSMUSP00000006956	0	0	0	0	0.418	0	0	0.419	0.647
Irg1	Rsad2	10090.ENSMUSP00000022722	10090.ENSMUSP00000020970	0	0	0	0	0.24	0	0	0.31	0.453
Irg1	Stx11	10090.ENSMUSP00000022722	10090.ENSMUSP00000046243	0	0	0	0	0.203	0	0	0.419	0.517
Irg1	Oasl1	10090.ENSMUSP00000022722	10090.ENSMUSP00000031540	0	0	0	0	0.598	0.058	0	0.268	0.698
Irg1	Tnf	10090.ENSMUSP00000022722	10090.ENSMUSP00000025263	0	0	0	0	0.672	0	0	0.375	0.786
Isg15	Rsad2	10090.ENSMUSP00000082548	10090.ENSMUSP00000020970	0	0	0	0	0.814	0	0	0.887	0.978
Isg15	Tnf	10090.ENSMUSP00000082548	10090.ENSMUSP00000025263	0	0	0	0	0.104	0.147	0	0.591	0.66
Isg15	Stat4	10090.ENSMUSP00000082548	10090.ENSMUSP00000027277	0	0	0	0	0.052	0	0	0.513	0.518
Isg15	Siglec1	10090.ENSMUSP00000082548	10090.ENSMUSP00000028794	0	0	0	0	0.083	0	0	0.382	0.409
Isg15	Oasl1	10090.ENSMUSP00000082548	10090.ENSMUSP00000031540	0	0	0	0	0.672	0	0	0.589	0.859
Isg15	Oasl2	10090.ENSMUSP00000082548	10090.ENSMUSP00000031542	0	0	0	0	0.606	0	0	0.745	0.895
Isg15	Lgals3bp	10090.ENSMUSP00000082548	10090.ENSMUSP00000035579	0	0	0	0	0.322	0	0	0.2	0.434
Isg15	Oas3	10090.ENSMUSP00000082548	10090.ENSMUSP00000035588	0	0	0	0	0.274	0	0	0.719	0.788
Isg15	Samhd1	10090.ENSMUSP00000082548	10090.ENSMUSP00000059717	0	0	0	0	0.162	0	0	0.541	0.599
Isg15	Oas2	10090.ENSMUSP00000082548	10090.ENSMUSP00000060082	0	0	0	0	0.378	0	0	0.755	0.841
Isg15	Tlr7	10090.ENSMUSP00000082548	10090.ENSMUSP00000061853	0	0	0	0	0.068	0.096	0	0.599	0.633
Isg15	Sp100	10090.ENSMUSP00000082548	10090.ENSMUSP00000066399	0	0	0	0	0.238	0.116	0	0.398	0.559
Isg15	Sh2d3c	10090.ENSMUSP00000082548	10090.ENSMUSP00000073866	0	0	0	0	0	0.054	0	0.414	0.421
Isg15	Oas1a	10090.ENSMUSP00000082548	10090.ENSMUSP00000079198	0	0	0	0	0.499	0	0	0.628	0.806
Isg15	Tlr8	10090.ENSMUSP00000082548	10090.ENSMUSP00000107793	0	0	0	0	0.062	0.096	0	0.431	0.475
Isg15	Samd9l	10090.ENSMUSP00000082548	10090.ENSMUSP00000112688	0	0	0	0	0.305	0	0	0.391	0.559
Isg15	Xaf1	10090.ENSMUSP00000082548	10090.ENSMUSP00000123011	0	0	0	0	0.569	0	0	0.472	0.763
Isg15	Oas1g	10090.ENSMUSP00000082548	10090.ENSMUSP00000083555	0	0	0	0	0.388	0	0	0.632	0.765
Klhl38	Snap91	10090.ENSMUSP00000022985	10090.ENSMUSP00000096096	0	0	0	0	0.05	0	0	0.398	0.404
Klk13	Plaur	10090.ENSMUSP00000065308	10090.ENSMUSP00000002284	0	0	0	0	0	0.066	0.415	0.091	0.46
Klk6	Tmem37	10090.ENSMUSP00000103601	10090.ENSMUSP00000050862	0	0	0	0	0	0	0	0.434	0.434
Klk9	Plaur	10090.ENSMUSP00000005891	10090.ENSMUSP00000002284	0	0	0	0	0	0.066	0.415	0.119	0.476
Klk9	Lce3f	10090.ENSMUSP00000005891	10090.ENSMUSP00000088375	0	0	0	0	0.066	0	0	0.491	0.504
Krt15	Krt19	10090.ENSMUSP00000103034	10090.ENSMUSP00000007317	0	0	0	0.967	0.126	0.233	0.3	0.637	0.5
Krt15	Krt84	10090.ENSMUSP00000103034	10090.ENSMUSP00000023720	0	0	0	0.738	0.051	0.059	0.6	0.352	0.644
Krt15	Krt6b	10090.ENSMUSP00000103034	10090.ENSMUSP00000023786	0	0	0	0.771	0.092	0.143	0.6	0.472	0.696
Krt15	Krt4	10090.ENSMUSP00000103034	10090.ENSMUSP00000023797	0	0	0	0.792	0.221	0.079	0.6	0.716	0.733
Krt15	Lgr6	10090.ENSMUSP00000103034	10090.ENSMUSP00000035444	0	0	0	0	0	0.058	0	0.665	0.67
Krt15	Krt75	10090.ENSMUSP00000103034	10090.ENSMUSP00000036246	0	0	0	0.773	0.111	0.058	0.6	0.521	0.677
Krt15	Krt77	10090.ENSMUSP00000103034	10090.ENSMUSP00000085311	0	0	0	0.781	0.111	0.239	0.6	0.289	0.722
Krt15	Krt32	10090.ENSMUSP00000103034	10090.ENSMUSP00000103042	0	0	0	0.919	0.117	0	0.5	0.5	0.557
Krt19	Tnf	10090.ENSMUSP00000007317	10090.ENSMUSP00000025263	0	0	0	0	0	0.055	0	0.401	0.409
Krt19	Osm	10090.ENSMUSP00000007317	10090.ENSMUSP00000074708	0	0	0	0	0	0	0	0.466	0.466
Krt19	Spp1	10090.ENSMUSP00000007317	10090.ENSMUSP00000108367	0	0	0	0	0	0	0	0.467	0.467
Krt19	Krt32	10090.ENSMUSP00000007317	10090.ENSMUSP00000103042	0	0	0	0.937	0.061	0	0.5	0.277	0.518
Krt19	Slc5a1	10090.ENSMUSP00000007317	10090.ENSMUSP00000011178	0	0	0	0	0.072	0	0	0.528	0.543
Krt19	Pls1	10090.ENSMUSP00000007317	10090.ENSMUSP00000091317	0	0	0	0	0.062	0.043	0	0.585	0.595
Krt19	Krt84	10090.ENSMUSP00000007317	10090.ENSMUSP00000023720	0	0	0	0.734	0.051	0.058	0.6	0.133	0.621
Krt19	Krt75	10090.ENSMUSP00000007317	10090.ENSMUSP00000036246	0	0	0	0.764	0.051	0.058	0.6	0.336	0.639
Krt19	Krt6b	10090.ENSMUSP00000007317	10090.ENSMUSP00000023786	0	0	0	0.73	0.064	0.218	0.6	0.247	0.7
Krt19	Krt4	10090.ENSMUSP00000007317	10090.ENSMUSP00000023797	0	0	0	0.75	0.09	0.254	0.6	0.538	0.743
Krt19	Krt77	10090.ENSMUSP00000007317	10090.ENSMUSP00000085311	0	0	0	0.709	0.162	0.584	0.6	0.218	0.856
Krt32	Krt84	10090.ENSMUSP00000103042	10090.ENSMUSP00000023720	0	0	0	0.687	0.074	0.058	0.6	0.753	0.709
Krt32	Krt6b	10090.ENSMUSP00000103042	10090.ENSMUSP00000023786	0	0	0	0.647	0.051	0.058	0.6	0.399	0.662
Krt32	Krt4	10090.ENSMUSP00000103042	10090.ENSMUSP00000023797	0	0	0	0.669	0.09	0.058	0.6	0.259	0.655
Krt32	Krt75	10090.ENSMUSP00000103042	10090.ENSMUSP00000036246	0	0	0	0.682	0.133	0.058	0.6	0.338	0.679
Krt32	Sprr2e	10090.ENSMUSP00000103042	10090.ENSMUSP00000064652	0	0	0	0	0	0	0	0.4	0.4
Krt32	Krt77	10090.ENSMUSP00000103042	10090.ENSMUSP00000085311	0	0	0	0.637	0.088	0.058	0.6	0.561	0.7
Krt4	Krt84	10090.ENSMUSP00000023797	10090.ENSMUSP00000023720	0	0	0	0.929	0	0	0.5	0.361	0.511
Krt4	Krt6b	10090.ENSMUSP00000023797	10090.ENSMUSP00000023786	0	0	0	0.962	0.063	0	0.5	0.528	0.52
Krt4	Rptn	10090.ENSMUSP00000023797	10090.ENSMUSP00000044998	0	0	0	0	0.412	0	0	0.073	0.432
Krt4	Krt77	10090.ENSMUSP00000023797	10090.ENSMUSP00000085311	0	0	0	0.955	0.098	0.16	0.3	0.382	0.432
Krt4	Krt75	10090.ENSMUSP00000023797	10090.ENSMUSP00000036246	0	0	0	0.962	0.062	0.055	0.5	0.444	0.525
Krt4	Lce3c	10090.ENSMUSP00000023797	10090.ENSMUSP00000050666	0	0	0	0	0.529	0	0	0.148	0.581
Krt4	Tgm3	10090.ENSMUSP00000023797	10090.ENSMUSP00000105928	0	0	0	0	0.129	0.69	0	0.357	0.811
Krt6b	Krt84	10090.ENSMUSP00000023786	10090.ENSMUSP00000023720	0	0	0	0.939	0	0	0.5	0.5	0.514
Krt6b	Sprr2d	10090.ENSMUSP00000023786	10090.ENSMUSP00000039821	0	0	0	0	0.163	0	0	0.322	0.408
Krt6b	Krt75	10090.ENSMUSP00000023786	10090.ENSMUSP00000036246	0	0	0	0.973	0.089	0.051	0.5	0.465	0.535
Krt6b	Sprr1b	10090.ENSMUSP00000023786	10090.ENSMUSP00000058617	0	0	0	0	0.251	0	0	0.432	0.556
Krt6b	Sprr2e	10090.ENSMUSP00000023786	10090.ENSMUSP00000064652	0	0	0	0	0.062	0	0	0.551	0.56
Krt6b	Krt77	10090.ENSMUSP00000023786	10090.ENSMUSP00000085311	0	0	0	0.95	0.098	0.16	0.5	0.551	0.599
Krt75	Krt84	10090.ENSMUSP00000036246	10090.ENSMUSP00000023720	0	0	0	0.937	0.073	0	0.5	0.547	0.533
Krt75	Krt77	10090.ENSMUSP00000036246	10090.ENSMUSP00000085311	0	0	0	0.947	0.075	0	0.5	0.223	0.522
Krt77	Krt84	10090.ENSMUSP00000085311	10090.ENSMUSP00000023720	0	0	0	0.906	0.061	0	0.5	0.465	0.53
Krt77	Sprr2e	10090.ENSMUSP00000085311	10090.ENSMUSP00000064652	0	0	0	0	0	0	0	0.463	0.463
Krt77	Skint4	10090.ENSMUSP00000085311	10090.ENSMUSP00000102176	0	0	0	0	0	0	0	0.4	0.4
Krt84	Lce3f	10090.ENSMUSP00000023720	10090.ENSMUSP00000088375	0	0	0	0	0	0	0	0.438	0.438
Krt84	Sprr2h	10090.ENSMUSP00000023720	10090.ENSMUSP00000053849	0	0	0	0	0	0	0	0.439	0.439
Lce3c	Rptn	10090.ENSMUSP00000050666	10090.ENSMUSP00000044998	0	0	0	0	0.575	0	0	0.111	0.606
Lce3c	Serpinb12	10090.ENSMUSP00000050666	10090.ENSMUSP00000080030	0	0	0	0	0.406	0	0	0	0.406
Lce3c	Lce3f	10090.ENSMUSP00000050666	10090.ENSMUSP00000088375	0	0	0	0.983	0.406	0	0	0.595	0.411
Lce3d	Serpinb3a	10090.ENSMUSP00000130993	10090.ENSMUSP00000027567	0	0	0	0	0.069	0	0	0.467	0.482
Lce3d	Sprr2h	10090.ENSMUSP00000130993	10090.ENSMUSP00000053849	0	0	0	0	0.179	0	0	0.356	0.449
Lce3d	Sprr1b	10090.ENSMUSP00000130993	10090.ENSMUSP00000058617	0	0	0	0	0.162	0	0	0.399	0.474
Lce3e	Serpinb3a	10090.ENSMUSP00000096484	10090.ENSMUSP00000027567	0	0	0	0	0.105	0	0	0.49	0.524
Lce3e	Rptn	10090.ENSMUSP00000096484	10090.ENSMUSP00000044998	0	0	0	0	0.159	0	0	0.354	0.433
Lce3f	Pinlyp	10090.ENSMUSP00000088375	10090.ENSMUSP00000011776	0	0	0	0	0	0	0	0.552	0.552
Lce3f	Stfa2	10090.ENSMUSP00000088375	10090.ENSMUSP00000023619	0	0	0	0	0	0	0	0.525	0.525
Lce3f	Stfa2l1	10090.ENSMUSP00000088375	10090.ENSMUSP00000078181	0	0	0	0	0	0	0	0.467	0.467
Lcn2	Saa3	10090.ENSMUSP00000053962	10090.ENSMUSP00000006956	0	0	0	0	0.492	0	0	0.593	0.784
Lcn2	Timp1	10090.ENSMUSP00000053962	10090.ENSMUSP00000009530	0	0	0	0	0.131	0	0	0.653	0.686
Lcn2	Serpina3n	10090.ENSMUSP00000053962	10090.ENSMUSP00000021506	0	0	0	0	0.145	0	0	0.489	0.544
Lcn2	Tnf	10090.ENSMUSP00000053962	10090.ENSMUSP00000025263	0	0	0	0	0.069	0	0	0.692	0.7
Lcn2	Slc11a1	10090.ENSMUSP00000053962	10090.ENSMUSP00000027368	0	0	0	0	0.094	0	0	0.396	0.43
Lcn2	Vcam1	10090.ENSMUSP00000053962	10090.ENSMUSP00000029574	0	0	0	0	0.079	0	0	0.44	0.462
Lcn2	Spp1	10090.ENSMUSP00000053962	10090.ENSMUSP00000108367	0	0	0	0	0.075	0	0	0.533	0.55
Lcn2	S100a9	10090.ENSMUSP00000053962	10090.ENSMUSP00000112843	0	0	0	0	0.384	0	0	0.393	0.61
Lcn2	Slpi	10090.ENSMUSP00000053962	10090.ENSMUSP00000104992	0	0	0	0	0.187	0	0	0.546	0.615
Lcn2	S100a8	10090.ENSMUSP00000053962	10090.ENSMUSP00000064385	0	0	0	0	0.42	0	0	0.375	0.622
Lcp2	Pinlyp	10090.ENSMUSP00000056621	10090.ENSMUSP00000011776	0	0	0	0	0.524	0	0	0	0.524
Lcp2	Ly86	10090.ENSMUSP00000056621	10090.ENSMUSP00000021860	0	0	0	0	0.421	0	0	0.175	0.502
Lcp2	Ripk3	10090.ENSMUSP00000056621	10090.ENSMUSP00000022830	0	0	0	0	0.171	0.078	0.302	0	0.42
Lcp2	Trem2	10090.ENSMUSP00000056621	10090.ENSMUSP00000024791	0	0	0	0	0.137	0	0.6	0.222	0.708
Lcp2	Tnf	10090.ENSMUSP00000056621	10090.ENSMUSP00000025263	0	0	0	0	0.285	0	0	0.34	0.508
Lcp2	Ms4a6d	10090.ENSMUSP00000056621	10090.ENSMUSP00000025582	0	0	0	0	0.418	0	0	0	0.418
Lcp2	Lpxn	10090.ENSMUSP00000056621	10090.ENSMUSP00000025601	0	0	0	0	0.417	0	0	0	0.417
Lcp2	Slc15a3	10090.ENSMUSP00000056621	10090.ENSMUSP00000025646	0	0	0	0	0.406	0	0	0	0.406
Lcp2	Slc11a1	10090.ENSMUSP00000056621	10090.ENSMUSP00000027368	0	0	0	0	0.405	0	0	0.161	0.479
Lcp2	Vcam1	10090.ENSMUSP00000056621	10090.ENSMUSP00000029574	0	0	0	0	0.519	0	0	0.179	0.588
Lcp2	Tyrobp	10090.ENSMUSP00000056621	10090.ENSMUSP00000032800	0	0	0	0	0.478	0	0.6	0.709	0.934
Lcp2	Ms4a6c	10090.ENSMUSP00000056621	10090.ENSMUSP00000132425	0	0	0	0	0.418	0	0	0	0.418
Lcp2	Ms4a6b	10090.ENSMUSP00000056621	10090.ENSMUSP00000124685	0	0	0	0	0.418	0	0	0	0.418
Lcp2	Srgn	10090.ENSMUSP00000056621	10090.ENSMUSP00000125622	0	0	0	0	0.449	0	0	0.061	0.461
Lcp2	Samsn1	10090.ENSMUSP00000056621	10090.ENSMUSP00000109877	0	0	0	0	0.464	0	0	0.045	0.467
Lcp2	Tlr7	10090.ENSMUSP00000056621	10090.ENSMUSP00000061853	0	0	0	0	0.525	0	0	0.104	0.556
Lcp2	Ncf2	10090.ENSMUSP00000056621	10090.ENSMUSP00000140404	0	0	0	0	0.463	0	0	0.236	0.572
Lcp2	Rgs1	10090.ENSMUSP00000056621	10090.ENSMUSP00000140624	0	0	0	0	0.546	0	0	0.128	0.588
Lcp2	Ly9	10090.ENSMUSP00000056621	10090.ENSMUSP00000069319	0	0	0	0	0.622	0	0	0.14	0.661
Lcp2	Plek	10090.ENSMUSP00000056621	10090.ENSMUSP00000099945	0	0	0	0	0.765	0	0	0.467	0.869
Lgals3bp	Rsad2	10090.ENSMUSP00000035579	10090.ENSMUSP00000020970	0	0	0	0	0.39	0.613	0	0.209	0.797
Lgals3bp	Oasl1	10090.ENSMUSP00000035579	10090.ENSMUSP00000031540	0	0	0	0	0.404	0	0	0.118	0.452
Lgals3bp	Oasl2	10090.ENSMUSP00000035579	10090.ENSMUSP00000031542	0	0	0	0	0.722	0	0	0.276	0.79
Lgals3bp	Sp100	10090.ENSMUSP00000035579	10090.ENSMUSP00000066399	0	0	0	0	0.263	0	0	0.225	0.405
Lgals3bp	Samd9l	10090.ENSMUSP00000035579	10090.ENSMUSP00000112688	0	0	0	0	0.401	0	0	0.493	0.683
Lgals3bp	Oas2	10090.ENSMUSP00000035579	10090.ENSMUSP00000060082	0	0	0	0	0.409	0.697	0	0.271	0.858
Lgmn	Tgm3	10090.ENSMUSP00000021607	10090.ENSMUSP00000105928	0	0	0	0	0	0	0	0.588	0.588
Lgmn	Tlr7	10090.ENSMUSP00000021607	10090.ENSMUSP00000061853	0	0	0	0	0.094	0	0.9	0.197	0.92
Lpxn	Ly86	10090.ENSMUSP00000025601	10090.ENSMUSP00000021860	0	0	0	0	0.449	0	0	0.228	0.557
Lpxn	Slc11a1	10090.ENSMUSP00000025601	10090.ENSMUSP00000027368	0	0	0	0	0.406	0	0	0	0.406
Lpxn	Slc15a3	10090.ENSMUSP00000025601	10090.ENSMUSP00000025646	0	0	0	0	0.41	0	0	0	0.41
Lpxn	Tyrobp	10090.ENSMUSP00000025601	10090.ENSMUSP00000032800	0	0	0	0	0.414	0	0	0	0.414
Lpxn	Tnc	10090.ENSMUSP00000025601	10090.ENSMUSP00000102995	0	0	0	0	0	0.044	0.413	0	0.414
Lpxn	Vcam1	10090.ENSMUSP00000025601	10090.ENSMUSP00000029574	0	0	0	0	0.107	0	0.38	0.059	0.434
Lpxn	Rgs1	10090.ENSMUSP00000025601	10090.ENSMUSP00000140624	0	0	0	0	0.398	0	0.183	0	0.487
Lpxn	Plek	10090.ENSMUSP00000025601	10090.ENSMUSP00000099945	0	0	0	0	0.392	0	0	0.209	0.499
Lrmda	Snrpn	10090.ENSMUSP00000075065	10090.ENSMUSP00000096003	0	0	0	0	0.079	0.468	0	0.186	0.566
Ly86	Ncf2	10090.ENSMUSP00000021860	10090.ENSMUSP00000140404	0	0	0	0	0.421	0	0	0.066	0.437
Ly86	Slc15a3	10090.ENSMUSP00000021860	10090.ENSMUSP00000025646	0	0	0	0	0.419	0	0	0.069	0.437
Ly86	Srgn	10090.ENSMUSP00000021860	10090.ENSMUSP00000125622	0	0	0	0	0.35	0	0	0.172	0.439
Ly86	Ms4a7	10090.ENSMUSP00000021860	10090.ENSMUSP00000064534	0	0	0	0	0.433	0	0	0.102	0.469
Ly86	Trem2	10090.ENSMUSP00000021860	10090.ENSMUSP00000024791	0	0	0	0	0.258	0	0	0.32	0.474
Ly86	Slc11a1	10090.ENSMUSP00000021860	10090.ENSMUSP00000027368	0	0	0	0	0.411	0	0	0.152	0.479
Ly86	Plek	10090.ENSMUSP00000021860	10090.ENSMUSP00000099945	0	0	0	0	0.484	0	0	0.06	0.494
Ly86	Ms4a6c	10090.ENSMUSP00000021860	10090.ENSMUSP00000132425	0	0	0	0	0.511	0	0	0	0.511
Ly86	Ms4a6b	10090.ENSMUSP00000021860	10090.ENSMUSP00000124685	0	0	0	0	0.559	0	0	0	0.559
Ly86	Tfec	10090.ENSMUSP00000021860	10090.ENSMUSP00000031533	0	0	0	0	0.175	0	0	0.502	0.572
Ly86	Tlr7	10090.ENSMUSP00000021860	10090.ENSMUSP00000061853	0	0	0	0	0.461	0.204	0	0.245	0.648
Ly86	Ms4a6d	10090.ENSMUSP00000021860	10090.ENSMUSP00000025582	0	0	0	0	0.563	0	0	0.277	0.671
Ly86	Tyrobp	10090.ENSMUSP00000021860	10090.ENSMUSP00000032800	0	0	0	0	0.74	0	0	0.382	0.833
Ly9	Tlr7	10090.ENSMUSP00000069319	10090.ENSMUSP00000061853	0	0	0	0	0.561	0	0	0.12	0.597
Ly9	Rgs1	10090.ENSMUSP00000069319	10090.ENSMUSP00000140624	0	0	0	0	0.253	0	0	0.25	0.416
Ly9	Plek	10090.ENSMUSP00000069319	10090.ENSMUSP00000099945	0	0	0	0	0.526	0	0	0.081	0.546
Mmd2	Paqr7	10090.ENSMUSP00000039357	10090.ENSMUSP00000080240	0	0	0	0	0.057	0	0	0.555	0.563
Mmp10	Plaur	10090.ENSMUSP00000034488	10090.ENSMUSP00000002284	0	0	0	0	0.078	0.202	0.402	0.283	0.642
Mmp10	Timp1	10090.ENSMUSP00000034488	10090.ENSMUSP00000009530	0	0	0	0	0.095	0.697	0.259	0.805	0.955
Mmp10	Mmp13	10090.ENSMUSP00000034488	10090.ENSMUSP00000015394	0	0	0.304	0.935	0.203	0	0.5	0.783	0.612
Mmp10	Tnf	10090.ENSMUSP00000034488	10090.ENSMUSP00000025263	0	0	0	0	0.062	0.048	0	0.622	0.633
Mmp10	Mmp19	10090.ENSMUSP00000034488	10090.ENSMUSP00000026411	0	0	0	0.764	0.062	0.057	0.5	0.329	0.553
Mmp10	Vcam1	10090.ENSMUSP00000034488	10090.ENSMUSP00000029574	0	0	0	0	0	0	0	0.427	0.427
Mmp10	Thbs1	10090.ENSMUSP00000034488	10090.ENSMUSP00000044903	0	0	0	0	0.088	0.06	0	0.368	0.411
Mmp10	Spp1	10090.ENSMUSP00000034488	10090.ENSMUSP00000108367	0	0	0	0	0.077	0.059	0	0.419	0.451
Mmp10	Ptgs2	10090.ENSMUSP00000034488	10090.ENSMUSP00000035065	0	0	0	0	0.104	0	0	0.495	0.528
Mmp13	Plaur	10090.ENSMUSP00000015394	10090.ENSMUSP00000002284	0	0	0	0	0.069	0.202	0.22	0.392	0.6
Mmp13	Timp1	10090.ENSMUSP00000015394	10090.ENSMUSP00000009530	0	0	0	0	0.112	0.255	0.259	0.943	0.968
Mmp13	Ptges	10090.ENSMUSP00000015394	10090.ENSMUSP00000099916	0	0	0	0	0.056	0	0	0.395	0.404
Mmp13	Tnmd	10090.ENSMUSP00000015394	10090.ENSMUSP00000033602	0	0	0	0	0	0	0	0.411	0.411
Mmp13	Thbs1	10090.ENSMUSP00000015394	10090.ENSMUSP00000044903	0	0	0	0	0.095	0.06	0	0.406	0.451
Mmp13	Vcam1	10090.ENSMUSP00000015394	10090.ENSMUSP00000029574	0	0	0	0	0.097	0	0	0.438	0.47
Mmp13	Srgn	10090.ENSMUSP00000015394	10090.ENSMUSP00000125622	0	0	0	0	0	0.057	0	0.467	0.477
Mmp13	Osm	10090.ENSMUSP00000015394	10090.ENSMUSP00000074708	0	0	0	0	0	0	0	0.499	0.499
Mmp13	Spp1	10090.ENSMUSP00000015394	10090.ENSMUSP00000108367	0	0	0	0	0.124	0.05	0	0.62	0.656
Mmp13	Ptgs2	10090.ENSMUSP00000015394	10090.ENSMUSP00000035065	0	0	0	0	0.131	0	0	0.631	0.666
Mmp13	Tnf	10090.ENSMUSP00000015394	10090.ENSMUSP00000025263	0	0	0	0	0.085	0.048	0	0.728	0.743
Mmp19	Timp1	10090.ENSMUSP00000026411	10090.ENSMUSP00000009530	0	0	0	0	0.062	0.331	0.259	0.303	0.632
Ms4a4a	Trem2	10090.ENSMUSP00000140768	10090.ENSMUSP00000024791	0	0	0	0	0.123	0	0	0.586	0.621
Ms4a4a	Tyrobp	10090.ENSMUSP00000140768	10090.ENSMUSP00000032800	0	0	0	0	0.22	0	0	0.359	0.479
Ms4a6b	Ms4a6d	10090.ENSMUSP00000124685	10090.ENSMUSP00000025582	0	0	0	0.969	0.649	0	0	0.468	0.653
Ms4a6b	Tyrobp	10090.ENSMUSP00000124685	10090.ENSMUSP00000032800	0	0	0	0	0.47	0	0	0.106	0.506
Ms4a6b	Pyhin1	10090.ENSMUSP00000124685	10090.ENSMUSP00000061900	0	0	0	0	0.54	0	0	0	0.54
Ms4a6b	Ms4a6c	10090.ENSMUSP00000124685	10090.ENSMUSP00000132425	0	0	0	0.969	0.917	0	0	0.7	0.918
Ms4a6c	Ms4a6d	10090.ENSMUSP00000132425	10090.ENSMUSP00000025582	0	0	0	0.957	0.699	0	0	0.61	0.706
Ms4a6c	Slc15a3	10090.ENSMUSP00000132425	10090.ENSMUSP00000025646	0	0	0	0	0.407	0	0	0	0.407
Ms4a6c	Msr1	10090.ENSMUSP00000132425	10090.ENSMUSP00000026021	0	0	0	0	0.412	0	0	0	0.412
Ms4a6c	Plac8	10090.ENSMUSP00000132425	10090.ENSMUSP00000031264	0	0	0	0	0.271	0	0	0.223	0.409
Ms4a6c	Tyrobp	10090.ENSMUSP00000132425	10090.ENSMUSP00000032800	0	0	0	0	0.484	0	0	0.101	0.517
Ms4a6c	Ms4a7	10090.ENSMUSP00000132425	10090.ENSMUSP00000064534	0	0	0	0.785	0.314	0	0	0.619	0.403
Ms4a6c	Plek	10090.ENSMUSP00000132425	10090.ENSMUSP00000099945	0	0	0	0	0.417	0	0	0	0.417
Ms4a6c	Ncf2	10090.ENSMUSP00000132425	10090.ENSMUSP00000140404	0	0	0	0	0.417	0	0	0	0.417
Ms4a6d	Saa3	10090.ENSMUSP00000025582	10090.ENSMUSP00000006956	0	0	0	0	0.368	0	0	0.234	0.495
Ms4a6d	Trem2	10090.ENSMUSP00000025582	10090.ENSMUSP00000024791	0	0	0	0	0.247	0	0	0.356	0.495
Ms4a6d	Tlr7	10090.ENSMUSP00000025582	10090.ENSMUSP00000061853	0	0	0	0	0.406	0	0	0	0.406
Ms4a6d	Ncf2	10090.ENSMUSP00000025582	10090.ENSMUSP00000140404	0	0	0	0	0.418	0	0	0	0.418
Ms4a6d	Rgs1	10090.ENSMUSP00000025582	10090.ENSMUSP00000140624	0	0	0	0	0.406	0	0	0.114	0.451
Ms4a6d	Plek	10090.ENSMUSP00000025582	10090.ENSMUSP00000099945	0	0	0	0	0.516	0	0	0	0.516
Ms4a6d	Msr1	10090.ENSMUSP00000025582	10090.ENSMUSP00000026021	0	0	0	0	0.606	0	0	0	0.606
Ms4a6d	Slc11a1	10090.ENSMUSP00000025582	10090.ENSMUSP00000027368	0	0	0	0	0.62	0	0	0	0.62
Ms4a6d	Ms4a7	10090.ENSMUSP00000025582	10090.ENSMUSP00000064534	0	0	0	0.781	0.617	0	0	0.552	0.662
Ms4a6d	Slc15a3	10090.ENSMUSP00000025582	10090.ENSMUSP00000025646	0	0	0	0	0.679	0	0	0	0.679
Ms4a6d	Tyrobp	10090.ENSMUSP00000025582	10090.ENSMUSP00000032800	0	0	0	0	0.686	0	0	0.261	0.758
Ms4a7	Trem2	10090.ENSMUSP00000064534	10090.ENSMUSP00000024791	0	0	0	0	0.342	0	0	0.328	0.54
Ms4a7	Tyrobp	10090.ENSMUSP00000064534	10090.ENSMUSP00000032800	0	0	0	0	0.544	0	0	0.277	0.656
Msr1	Saa3	10090.ENSMUSP00000026021	10090.ENSMUSP00000006956	0	0	0	0	0.161	0	0.54	0.129	0.634
Msr1	Trem2	10090.ENSMUSP00000026021	10090.ENSMUSP00000024791	0	0	0	0	0.246	0	0	0.393	0.522
Msr1	Tnf	10090.ENSMUSP00000026021	10090.ENSMUSP00000025263	0	0	0	0	0.203	0	0	0.527	0.606
Msr1	Slc15a3	10090.ENSMUSP00000026021	10090.ENSMUSP00000025646	0	0	0	0	0.406	0	0	0	0.406
Msr1	Pmel	10090.ENSMUSP00000026021	10090.ENSMUSP00000051869	0	0	0	0	0.061	0	0	0.445	0.457
Msr1	Slc11a1	10090.ENSMUSP00000026021	10090.ENSMUSP00000027368	0	0	0	0	0.423	0	0	0.147	0.487
Msr1	Tyrobp	10090.ENSMUSP00000026021	10090.ENSMUSP00000032800	0	0	0	0	0.417	0	0	0.184	0.504
Msr1	Siglec1	10090.ENSMUSP00000026021	10090.ENSMUSP00000028794	0	0	0	0	0.134	0	0	0.484	0.534
Ncan	Ptn	10090.ENSMUSP00000002412	10090.ENSMUSP00000099073	0	0	0	0	0.125	0.087	0	0.314	0.404
Ncan	Tnc	10090.ENSMUSP00000002412	10090.ENSMUSP00000102995	0	0	0	0	0.061	0.563	0.6	0.087	0.83
Ncf1	Plek	10090.ENSMUSP00000016094	10090.ENSMUSP00000099945	0	0	0	0	0.292	0	0	0.193	0.404
Ncf1	Tyrobp	10090.ENSMUSP00000016094	10090.ENSMUSP00000032800	0	0	0	0	0.37	0	0	0.1	0.409
Ncf1	Ptgs2	10090.ENSMUSP00000016094	10090.ENSMUSP00000035065	0	0	0	0	0.051	0	0	0.417	0.424
Ncf1	Nlrp3	10090.ENSMUSP00000016094	10090.ENSMUSP00000098707	0	0	0	0	0.154	0	0	0.362	0.437
Ncf1	S100a8	10090.ENSMUSP00000016094	10090.ENSMUSP00000064385	0	0	0	0	0.123	0	0.6	0.087	0.651
Ncf1	S100a9	10090.ENSMUSP00000016094	10090.ENSMUSP00000112843	0	0	0	0	0.126	0	0.6	0.124	0.667
Ncf1	Tnf	10090.ENSMUSP00000016094	10090.ENSMUSP00000025263	0	0	0	0	0.16	0	0	0.665	0.706
Ncf1	Vcam1	10090.ENSMUSP00000016094	10090.ENSMUSP00000029574	0	0	0	0	0.062	0	0.9	0.482	0.947
Ncf1	Ncf2	10090.ENSMUSP00000016094	10090.ENSMUSP00000140404	0	0	0	0	0.253	0.936	0.932	0.995	0.999
Ncf2	Tnf	10090.ENSMUSP00000140404	10090.ENSMUSP00000025263	0	0	0	0	0.128	0	0	0.552	0.592
Ncf2	Slc15a3	10090.ENSMUSP00000140404	10090.ENSMUSP00000025646	0	0	0	0	0.419	0	0	0	0.419
Ncf2	Slc11a1	10090.ENSMUSP00000140404	10090.ENSMUSP00000027368	0	0	0	0	0.419	0	0	0.254	0.548
Ncf2	Vcam1	10090.ENSMUSP00000140404	10090.ENSMUSP00000029574	0	0	0	0	0.099	0	0.9	0.314	0.932
Ncf2	Tyrobp	10090.ENSMUSP00000140404	10090.ENSMUSP00000032800	0	0	0	0	0.586	0	0	0.146	0.631
Ncf2	S100a8	10090.ENSMUSP00000140404	10090.ENSMUSP00000064385	0	0	0	0	0.31	0.13	0.6	0.451	0.85
Ncf2	Plek	10090.ENSMUSP00000140404	10090.ENSMUSP00000099945	0	0	0	0	0.477	0	0	0.146	0.535
Ncf2	S100a9	10090.ENSMUSP00000140404	10090.ENSMUSP00000112843	0	0	0	0	0.263	0.13	0.6	0.124	0.745
Ncf2	Srgn	10090.ENSMUSP00000140404	10090.ENSMUSP00000125622	0	0	0	0	0.36	0	0	0.123	0.415
Ncf2	Rgs1	10090.ENSMUSP00000140404	10090.ENSMUSP00000140624	0	0	0	0	0.437	0.143	0	0.218	0.59
Nfkbid	Tnf	10090.ENSMUSP00000042317	10090.ENSMUSP00000025263	0	0	0	0	0.239	0.058	0.24	0.351	0.599
Nkd1	Upp1	10090.ENSMUSP00000034086	10090.ENSMUSP00000020677	0	0	0	0	0	0	0	0.42	0.42
Nkd1	Notum	10090.ENSMUSP00000034086	10090.ENSMUSP00000101784	0	0	0	0	0.062	0	0	0.482	0.494
Nlrp3	Ripk3	10090.ENSMUSP00000098707	10090.ENSMUSP00000022830	0	0	0	0	0.063	0	0	0.671	0.678
Nlrp3	Trem2	10090.ENSMUSP00000098707	10090.ENSMUSP00000024791	0	0	0	0	0.134	0	0	0.393	0.451
Nlrp3	Tnf	10090.ENSMUSP00000098707	10090.ENSMUSP00000025263	0	0	0	0	0.212	0	0	0.813	0.846
Nlrp3	Serpinb3c	10090.ENSMUSP00000098707	10090.ENSMUSP00000027565	0	0	0	0	0	0	0	0.463	0.463
Nlrp3	Vcam1	10090.ENSMUSP00000098707	10090.ENSMUSP00000029574	0	0	0	0	0.051	0	0	0.435	0.441
Nlrp3	Ptgs2	10090.ENSMUSP00000098707	10090.ENSMUSP00000035065	0	0	0	0	0.097	0	0	0.495	0.524
Nlrp3	Tlr7	10090.ENSMUSP00000098707	10090.ENSMUSP00000061853	0	0	0	0	0.181	0.043	0	0.684	0.731
Nlrp3	Serpinb6e	10090.ENSMUSP00000098707	10090.ENSMUSP00000105904	0	0	0	0	0	0	0	0.463	0.463
Nlrp3	Tlr8	10090.ENSMUSP00000098707	10090.ENSMUSP00000107793	0	0	0	0	0.176	0.043	0	0.564	0.626
Notum	Wnt10b	10090.ENSMUSP00000101784	10090.ENSMUSP00000023732	0	0	0	0	0	0.237	0.6	0.224	0.742
Notum	Wnt7a	10090.ENSMUSP00000101784	10090.ENSMUSP00000032180	0	0	0	0	0	0.392	0.6	0.268	0.806
Nrg1	Shc3	10090.ENSMUSP00000073546	10090.ENSMUSP00000021898	0	0	0	0	0	0	0.423	0.042	0.423
Ntrk3	Shc3	10090.ENSMUSP00000037909	10090.ENSMUSP00000021898	0	0	0	0	0.114	0.228	0.898	0.192	0.936
Oas1a	Rsad2	10090.ENSMUSP00000079198	10090.ENSMUSP00000020970	0	0	0	0	0.397	0	0	0.58	0.736
Oas1a	Oasl1	10090.ENSMUSP00000079198	10090.ENSMUSP00000031540	0	0	0	0.845	0.362	0	0	0.552	0.414
Oas1a	Xaf1	10090.ENSMUSP00000079198	10090.ENSMUSP00000123011	0	0	0	0	0.269	0	0	0.254	0.432
Oas1g	Rsad2	10090.ENSMUSP00000083555	10090.ENSMUSP00000020970	0	0	0	0	0.4	0	0	0.599	0.749
Oas1g	Oasl1	10090.ENSMUSP00000083555	10090.ENSMUSP00000031540	0	0	0	0.846	0.333	0	0	0.69	0.402
Oas1g	Oas2	10090.ENSMUSP00000083555	10090.ENSMUSP00000060082	0	0	0	0.927	0.463	0	0	0.732	0.491
Oas1g	Xaf1	10090.ENSMUSP00000083555	10090.ENSMUSP00000123011	0	0	0	0	0.269	0	0	0.221	0.407
Oas2	Slfn4	10090.ENSMUSP00000060082	10090.ENSMUSP00000000208	0	0	0	0	0.272	0	0	0.431	0.568
Oas2	Rsad2	10090.ENSMUSP00000060082	10090.ENSMUSP00000020970	0	0	0	0	0.64	0.701	0	0.708	0.965
Oas2	Oasl1	10090.ENSMUSP00000060082	10090.ENSMUSP00000031540	0	0	0	0.766	0.707	0	0	0.626	0.749
Oas2	Oasl2	10090.ENSMUSP00000060082	10090.ENSMUSP00000031542	0	0	0	0.798	0.702	0	0	0.793	0.749
Oas2	Oas3	10090.ENSMUSP00000060082	10090.ENSMUSP00000035588	0	0	0	0.914	0.598	0	0	0.843	0.626
Oas2	Samhd1	10090.ENSMUSP00000060082	10090.ENSMUSP00000059717	0	0	0	0	0.275	0	0	0.304	0.473
Oas2	Samd9l	10090.ENSMUSP00000060082	10090.ENSMUSP00000112688	0	0	0	0	0.327	0	0	0.327	0.528
Oas2	Xaf1	10090.ENSMUSP00000060082	10090.ENSMUSP00000123011	0	0	0	0	0.19	0	0	0.464	0.547
Oas2	Sp100	10090.ENSMUSP00000060082	10090.ENSMUSP00000066399	0	0	0	0	0.448	0.047	0	0.235	0.563
Oas2	Tlr7	10090.ENSMUSP00000060082	10090.ENSMUSP00000061853	0	0	0	0	0.163	0.381	0	0.384	0.652
Oas3	Slfn4	10090.ENSMUSP00000035588	10090.ENSMUSP00000000208	0	0	0	0	0.247	0	0	0.453	0.57
Oas3	Rsad2	10090.ENSMUSP00000035588	10090.ENSMUSP00000020970	0	0	0	0	0.458	0	0	0.598	0.773
Oas3	Oasl1	10090.ENSMUSP00000035588	10090.ENSMUSP00000031540	0	0	0	0.806	0.465	0	0	0.646	0.53
Oas3	Oasl2	10090.ENSMUSP00000035588	10090.ENSMUSP00000031542	0	0	0	0.837	0.397	0	0	0.757	0.47
Oas3	Samd9l	10090.ENSMUSP00000035588	10090.ENSMUSP00000112688	0	0	0	0	0.196	0	0	0.317	0.428
Oas3	Sp100	10090.ENSMUSP00000035588	10090.ENSMUSP00000066399	0	0	0	0	0.263	0.047	0	0.257	0.433
Oas3	Xaf1	10090.ENSMUSP00000035588	10090.ENSMUSP00000123011	0	0	0	0	0.195	0	0	0.435	0.525
Oasl1	Slfn4	10090.ENSMUSP00000031540	10090.ENSMUSP00000000208	0	0	0	0	0.417	0	0	0.295	0.571
Oasl1	Rsad2	10090.ENSMUSP00000031540	10090.ENSMUSP00000020970	0	0	0	0	0.818	0	0	0.556	0.916
Oasl1	Tnf	10090.ENSMUSP00000031540	10090.ENSMUSP00000025263	0	0	0	0	0.212	0.147	0	0.225	0.434
Oasl1	Samhd1	10090.ENSMUSP00000031540	10090.ENSMUSP00000059717	0	0	0	0	0.212	0	0	0.283	0.411
Oasl1	Sp100	10090.ENSMUSP00000031540	10090.ENSMUSP00000066399	0	0	0	0	0.293	0.116	0	0.188	0.449
Oasl1	Xaf1	10090.ENSMUSP00000031540	10090.ENSMUSP00000123011	0	0	0	0	0.489	0	0	0.294	0.624
Oasl1	Oasl2	10090.ENSMUSP00000031540	10090.ENSMUSP00000031542	0	0	0	0.926	0.652	0	0.8	0.669	0.93
Oasl2	Slfn4	10090.ENSMUSP00000031542	10090.ENSMUSP00000000208	0	0	0	0	0.203	0	0	0.325	0.44
Oasl2	Rsad2	10090.ENSMUSP00000031542	10090.ENSMUSP00000020970	0	0	0	0	0.749	0	0	0.732	0.929
Oasl2	Tnf	10090.ENSMUSP00000031542	10090.ENSMUSP00000025263	0	0	0	0	0.09	0.147	0	0.307	0.415
Oasl2	Tlr7	10090.ENSMUSP00000031542	10090.ENSMUSP00000061853	0	0	0	0	0.087	0.096	0	0.372	0.437
Oasl2	Samhd1	10090.ENSMUSP00000031542	10090.ENSMUSP00000059717	0	0	0	0	0.29	0	0	0.343	0.514
Oasl2	Samd9l	10090.ENSMUSP00000031542	10090.ENSMUSP00000112688	0	0	0	0	0.479	0	0	0.198	0.564
Oasl2	Sp100	10090.ENSMUSP00000031542	10090.ENSMUSP00000066399	0	0	0	0	0.504	0.116	0	0.136	0.588
Oasl2	Xaf1	10090.ENSMUSP00000031542	10090.ENSMUSP00000123011	0	0	0	0	0.394	0	0	0.48	0.672
Osm	Timp1	10090.ENSMUSP00000074708	10090.ENSMUSP00000009530	0	0	0	0	0	0	0	0.463	0.463
Osm	Tnf	10090.ENSMUSP00000074708	10090.ENSMUSP00000025263	0	0	0	0	0.178	0	0	0.632	0.684
Osm	Stat4	10090.ENSMUSP00000074708	10090.ENSMUSP00000027277	0	0	0	0	0.062	0	0	0.395	0.408
Pdgfrl	Shc3	10090.ENSMUSP00000034004	10090.ENSMUSP00000021898	0	0	0	0	0	0.199	0.284	0.043	0.403
Pdgfrl	Tnmd	10090.ENSMUSP00000034004	10090.ENSMUSP00000033602	0	0	0	0	0.061	0	0	0.562	0.571
Pdzk1	Slc5a8	10090.ENSMUSP00000102685	10090.ENSMUSP00000020255	0	0	0	0	0.062	0	0	0.785	0.79
Pdzk1	Slc15a2	10090.ENSMUSP00000102685	10090.ENSMUSP00000023616	0	0	0	0	0.066	0.087	0	0.706	0.728
Pdzk1	Slc13a3	10090.ENSMUSP00000102685	10090.ENSMUSP00000029208	0	0	0	0	0.085	0.046	0	0.406	0.437
Pdzrn4	Tnf	10090.ENSMUSP00000133159	10090.ENSMUSP00000025263	0	0	0	0	0	0.215	0.334	0	0.454
Pglyrp1	Trem3	10090.ENSMUSP00000032573	10090.ENSMUSP00000044478	0	0	0	0	0.096	0	0	0.505	0.534
Pinlyp	Stfa2l1	10090.ENSMUSP00000011776	10090.ENSMUSP00000078181	0	0	0	0	0.065	0	0	0.393	0.408
Pinlyp	Stfa2	10090.ENSMUSP00000011776	10090.ENSMUSP00000023619	0	0	0	0	0.065	0	0	0.43	0.444
Pinlyp	Tlr7	10090.ENSMUSP00000011776	10090.ENSMUSP00000061853	0	0	0	0	0.524	0	0	0	0.524
Pla2g4d	Ptgs2	10090.ENSMUSP00000092252	10090.ENSMUSP00000035065	0	0	0	0	0.051	0	0.65	0.051	0.657
Pla2g4d	Stx11	10090.ENSMUSP00000092252	10090.ENSMUSP00000046243	0	0	0	0	0.119	0.218	0.216	0.071	0.431
Plaur	Thbs1	10090.ENSMUSP00000002284	10090.ENSMUSP00000044903	0	0	0	0	0.149	0	0	0.399	0.466
Plaur	Ptgs2	10090.ENSMUSP00000002284	10090.ENSMUSP00000035065	0	0	0	0	0.194	0.057	0	0.367	0.476
Plaur	Tnf	10090.ENSMUSP00000002284	10090.ENSMUSP00000025263	0	0	0	0	0.215	0	0	0.464	0.561
Plaur	Spp1	10090.ENSMUSP00000002284	10090.ENSMUSP00000108367	0	0	0	0	0.103	0	0	0.625	0.65
Plaur	Timp1	10090.ENSMUSP00000002284	10090.ENSMUSP00000009530	0	0	0	0	0.208	0	0	0.737	0.783
Plek	Rgs9	10090.ENSMUSP00000099945	10090.ENSMUSP00000020920	0	0	0	0	0.063	0	0	0.466	0.478
Plek	Rgs11	10090.ENSMUSP00000099945	10090.ENSMUSP00000025020	0	0	0	0	0.063	0	0	0.539	0.55
Plek	Tnf	10090.ENSMUSP00000099945	10090.ENSMUSP00000025263	0	0	0	0	0.232	0	0	0.36	0.487
Plek	Slc15a3	10090.ENSMUSP00000099945	10090.ENSMUSP00000025646	0	0	0	0	0.545	0	0	0	0.545
Plek	Slc11a1	10090.ENSMUSP00000099945	10090.ENSMUSP00000027368	0	0	0	0	0.401	0	0	0	0.4
Plek	Vcam1	10090.ENSMUSP00000099945	10090.ENSMUSP00000029574	0	0	0	0	0.54	0	0	0.139	0.587
Plek	Tyrobp	10090.ENSMUSP00000099945	10090.ENSMUSP00000032800	0	0	0	0	0.67	0	0	0.181	0.718
Plek	Tlr7	10090.ENSMUSP00000099945	10090.ENSMUSP00000061853	0	0	0	0	0.602	0	0	0.107	0.629
Plek	Samsn1	10090.ENSMUSP00000099945	10090.ENSMUSP00000109877	0	0	0	0	0.423	0.058	0	0	0.433
Plek	Srgn	10090.ENSMUSP00000099945	10090.ENSMUSP00000125622	0	0	0	0	0.47	0	0	0.054	0.477
Plek	Rgs1	10090.ENSMUSP00000099945	10090.ENSMUSP00000140624	0	0	0	0	0.469	0	0	0.196	0.555
Pmaip1	Tnf	10090.ENSMUSP00000025399	10090.ENSMUSP00000025263	0	0	0	0	0	0	0	0.466	0.465
Pmel	Tnf	10090.ENSMUSP00000051869	10090.ENSMUSP00000025263	0	0	0	0	0	0	0	0.515	0.515
Pmel	Serpinb3c	10090.ENSMUSP00000051869	10090.ENSMUSP00000027565	0	0	0	0	0	0.043	0	0.553	0.553
Pmel	Serpinb6e	10090.ENSMUSP00000051869	10090.ENSMUSP00000105904	0	0	0	0	0	0.043	0	0.553	0.553
Ptges	Tnf	10090.ENSMUSP00000099916	10090.ENSMUSP00000025263	0	0	0	0	0.079	0	0	0.59	0.606
Ptges	Ptgs2	10090.ENSMUSP00000099916	10090.ENSMUSP00000035065	0	0	0	0	0.122	0	0.9	0.988	0.998
Ptgs2	Timp1	10090.ENSMUSP00000035065	10090.ENSMUSP00000009530	0	0	0	0	0.213	0	0	0.55	0.631
Ptgs2	Tnf	10090.ENSMUSP00000035065	10090.ENSMUSP00000025263	0	0	0	0	0.117	0	0	0.858	0.869
Ptgs2	Stat4	10090.ENSMUSP00000035065	10090.ENSMUSP00000027277	0	0	0	0	0.061	0	0	0.398	0.41
Ptgs2	Vcam1	10090.ENSMUSP00000035065	10090.ENSMUSP00000029574	0	0	0	0	0.076	0	0	0.671	0.683
Ptgs2	Tlr8	10090.ENSMUSP00000035065	10090.ENSMUSP00000107793	0	0	0	0	0.062	0.042	0	0.438	0.451
Ptgs2	Thbs1	10090.ENSMUSP00000035065	10090.ENSMUSP00000044903	0	0	0	0	0.155	0	0	0.411	0.481
Ptgs2	Spp1	10090.ENSMUSP00000035065	10090.ENSMUSP00000108367	0	0	0	0	0.104	0	0	0.501	0.533
Ptn	Slc2a3	10090.ENSMUSP00000099073	10090.ENSMUSP00000032476	0	0	0	0	0.062	0	0	0.629	0.637
Pydc4	Trim30b	10090.ENSMUSP00000095070	10090.ENSMUSP00000102444	0	0	0	0	0.069	0	0	0.465	0.48
Pyhin1	Sp100	10090.ENSMUSP00000061900	10090.ENSMUSP00000066399	0	0	0	0	0.416	0.058	0	0.059	0.437
Rbp2	Sdf2l1	10090.ENSMUSP00000140676	10090.ENSMUSP00000023453	0	0	0	0	0	0	0	0.517	0.517
Rbp2	Stra6	10090.ENSMUSP00000140676	10090.ENSMUSP00000034880	0	0	0	0	0	0	0	0.701	0.701
Rgs1	Rgs9	10090.ENSMUSP00000140624	10090.ENSMUSP00000020920	0	0	0	0.789	0	0	0.9	0.545	0.911
Rgs1	Rgs11	10090.ENSMUSP00000140624	10090.ENSMUSP00000025020	0	0	0	0.782	0	0	0.9	0.479	0.909
Rgs1	Slc15a3	10090.ENSMUSP00000140624	10090.ENSMUSP00000025646	0	0	0	0	0.405	0	0	0	0.405
Rgs1	Tyrobp	10090.ENSMUSP00000140624	10090.ENSMUSP00000032800	0	0	0	0	0.458	0	0	0.096	0.489
Rgs1	Samsn1	10090.ENSMUSP00000140624	10090.ENSMUSP00000109877	0	0	0	0	0.317	0	0	0.2	0.43
Rgs11	Rgs9	10090.ENSMUSP00000025020	10090.ENSMUSP00000020920	0	0	0	0.946	0	0	0.9	0.865	0.904
Ripk3	Tlr7	10090.ENSMUSP00000022830	10090.ENSMUSP00000061853	0	0	0	0	0.062	0.089	0.204	0.254	0.424
Ripk3	Tnf	10090.ENSMUSP00000022830	10090.ENSMUSP00000025263	0	0	0	0	0.09	0.047	0.327	0.705	0.805
Rptn	Sprr2d	10090.ENSMUSP00000044998	10090.ENSMUSP00000039821	0	0	0	0	0.137	0	0	0.586	0.627
Rptn	Skint4	10090.ENSMUSP00000044998	10090.ENSMUSP00000102176	0	0	0	0	0	0	0	0.4	0.4
Rptn	Serpinb12	10090.ENSMUSP00000044998	10090.ENSMUSP00000080030	0	0	0	0	0.347	0	0	0.129	0.407
Rptn	Sprr1b	10090.ENSMUSP00000044998	10090.ENSMUSP00000058617	0	0	0	0	0.221	0	0	0.307	0.437
Rptn	Sprr2e	10090.ENSMUSP00000044998	10090.ENSMUSP00000064652	0	0	0	0	0	0	0	0.464	0.463
Rptn	Sprr2h	10090.ENSMUSP00000044998	10090.ENSMUSP00000053849	0	0	0	0	0.101	0	0	0.689	0.708
Rptn	Stfa3	10090.ENSMUSP00000044998	10090.ENSMUSP00000067445	0	0	0	0	0.102	0	0.9	0	0.906
Rsad2	Slfn4	10090.ENSMUSP00000020970	10090.ENSMUSP00000000208	0	0	0	0	0.27	0	0	0.223	0.408
Rsad2	Siglec1	10090.ENSMUSP00000020970	10090.ENSMUSP00000028794	0	0	0	0	0.073	0	0	0.406	0.426
Rsad2	Tnf	10090.ENSMUSP00000020970	10090.ENSMUSP00000025263	0	0	0	0	0.151	0	0	0.402	0.47
Rsad2	Sp100	10090.ENSMUSP00000020970	10090.ENSMUSP00000066399	0	0	0	0	0.302	0	0	0.278	0.475
Rsad2	Samhd1	10090.ENSMUSP00000020970	10090.ENSMUSP00000059717	0	0	0	0	0.16	0	0	0.537	0.594
Rsad2	Tlr7	10090.ENSMUSP00000020970	10090.ENSMUSP00000061853	0	0	0	0	0.09	0	0	0.634	0.653
Rsad2	Samd9l	10090.ENSMUSP00000020970	10090.ENSMUSP00000112688	0	0	0	0	0.534	0	0	0.466	0.741
Rsad2	Xaf1	10090.ENSMUSP00000020970	10090.ENSMUSP00000123011	0	0	0	0	0.709	0	0	0.511	0.852
S100a8	Saa3	10090.ENSMUSP00000064385	10090.ENSMUSP00000006956	0	0	0	0	0.205	0	0	0.282	0.405
S100a8	Tnf	10090.ENSMUSP00000064385	10090.ENSMUSP00000025263	0	0	0	0	0.119	0	0	0.528	0.566
S100a8	Tlr8	10090.ENSMUSP00000064385	10090.ENSMUSP00000107793	0	0	0	0	0.218	0.046	0.219	0.124	0.421
S100a8	S100a9	10090.ENSMUSP00000064385	10090.ENSMUSP00000112843	0	0	0	0.849	0.986	0.938	0.932	0.973	0.999
S100a9	Saa3	10090.ENSMUSP00000112843	10090.ENSMUSP00000006956	0	0	0	0	0.186	0	0	0.332	0.434
S100a9	Tnf	10090.ENSMUSP00000112843	10090.ENSMUSP00000025263	0	0	0	0	0.081	0	0	0.41	0.435
S100a9	Stfa3	10090.ENSMUSP00000112843	10090.ENSMUSP00000067445	0	0	0	0	0.27	0	0	0.328	0.488
Saa3	Timp1	10090.ENSMUSP00000006956	10090.ENSMUSP00000009530	0	0	0	0	0.255	0	0	0.337	0.485
Saa3	Tnf	10090.ENSMUSP00000006956	10090.ENSMUSP00000025263	0	0	0	0	0.123	0	0	0.574	0.61
Samd9l	Sp100	10090.ENSMUSP00000112688	10090.ENSMUSP00000066399	0	0	0	0	0.36	0	0	0.119	0.412
Samd9l	Xaf1	10090.ENSMUSP00000112688	10090.ENSMUSP00000123011	0	0	0	0	0.572	0	0	0.319	0.696
Samhd1	Sp100	10090.ENSMUSP00000059717	10090.ENSMUSP00000066399	0	0	0	0	0.338	0.053	0	0.172	0.435
Samhd1	Tlr7	10090.ENSMUSP00000059717	10090.ENSMUSP00000061853	0	0	0	0	0.134	0.058	0	0.433	0.497
Samsn1	Slc7a11	10090.ENSMUSP00000109877	10090.ENSMUSP00000029297	0	0	0	0	0.049	0	0	0.509	0.513
Samsn1	Tgm3	10090.ENSMUSP00000109877	10090.ENSMUSP00000105928	0	0	0	0	0	0	0	0.501	0.501
Samsn1	Srgn	10090.ENSMUSP00000109877	10090.ENSMUSP00000125622	0	0	0	0	0.417	0	0	0.074	0.437
Serpina3n	Timp1	10090.ENSMUSP00000021506	10090.ENSMUSP00000009530	0	0	0	0	0.162	0	0	0.32	0.406
Serpina3n	Tnf	10090.ENSMUSP00000021506	10090.ENSMUSP00000025263	0	0	0	0	0	0	0	0.423	0.423
Serpina3n	Slc11a1	10090.ENSMUSP00000021506	10090.ENSMUSP00000027368	0	0	0	0	0	0	0	0.558	0.558
Serpinb12	Stfa2	10090.ENSMUSP00000080030	10090.ENSMUSP00000023619	0	0	0	0	0.101	0	0	0.4	0.437
Serpinb3c	Tnf	10090.ENSMUSP00000027565	10090.ENSMUSP00000025263	0	0	0	0	0	0	0	0.8	0.8
Serpinb3c	Vcam1	10090.ENSMUSP00000027565	10090.ENSMUSP00000029574	0	0	0	0	0	0	0	0.529	0.529
Serpinb3c	Tlr7	10090.ENSMUSP00000027565	10090.ENSMUSP00000061853	0	0	0	0	0	0	0	0.552	0.552
Serpinb6e	Tnf	10090.ENSMUSP00000105904	10090.ENSMUSP00000025263	0	0	0	0	0	0	0	0.8	0.8
Serpinb6e	Vcam1	10090.ENSMUSP00000105904	10090.ENSMUSP00000029574	0	0	0	0	0	0	0	0.529	0.529
Serpinb6e	Tlr7	10090.ENSMUSP00000105904	10090.ENSMUSP00000061853	0	0	0	0	0	0	0	0.552	0.552
Siglec1	Tnf	10090.ENSMUSP00000028794	10090.ENSMUSP00000025263	0	0	0	0	0.062	0.059	0	0.466	0.487
Siglec1	Tlr7	10090.ENSMUSP00000028794	10090.ENSMUSP00000061853	0	0	0	0	0.105	0.059	0.127	0.395	0.495
Siglec1	Tyrobp	10090.ENSMUSP00000028794	10090.ENSMUSP00000032800	0	0	0	0	0.194	0	0	0.836	0.862
Sirpb1a	Trem2	10090.ENSMUSP00000096807	10090.ENSMUSP00000024791	0	0	0	0	0.072	0	0	0.542	0.557
Sirpb1a	Tyrobp	10090.ENSMUSP00000096807	10090.ENSMUSP00000032800	0	0	0	0	0.121	0.164	0.8	0.883	0.98
Sirpb1a	Trem3	10090.ENSMUSP00000096807	10090.ENSMUSP00000044478	0	0	0	0	0.117	0	0	0.437	0.482
Sirpb1c	Tyrobp	10090.ENSMUSP00000061216	10090.ENSMUSP00000032800	0	0	0	0	0.15	0.164	0.8	0.109	0.856
Skint4	Sprr2e	10090.ENSMUSP00000102176	10090.ENSMUSP00000064652	0	0	0	0	0	0	0	0.665	0.665
Slc11a1	Tnf	10090.ENSMUSP00000027368	10090.ENSMUSP00000025263	0	0	0	0	0.122	0	0	0.474	0.519
Slc11a1	Slc15a3	10090.ENSMUSP00000027368	10090.ENSMUSP00000025646	0	0	0	0	0.659	0.091	0	0.267	0.753
Slc11a1	Tyrobp	10090.ENSMUSP00000027368	10090.ENSMUSP00000032800	0	0	0	0	0.642	0	0	0.105	0.666
Slc13a3	Slc5a1	10090.ENSMUSP00000029208	10090.ENSMUSP00000011178	0	0	0	0	0.068	0	0	0.44	0.455
Slc13a3	Slc5a8	10090.ENSMUSP00000029208	10090.ENSMUSP00000020255	0	0	0.216	0	0.065	0	0	0.379	0.505
Slc13a3	Slc15a2	10090.ENSMUSP00000029208	10090.ENSMUSP00000023616	0	0	0	0	0.066	0	0	0.39	0.406
Slc15a2	Slc5a1	10090.ENSMUSP00000023616	10090.ENSMUSP00000011178	0.043	0	0	0	0.063	0	0	0.525	0.537
Slc15a3	Tyrobp	10090.ENSMUSP00000025646	10090.ENSMUSP00000032800	0	0	0	0	0.637	0	0	0.059	0.644
Slc15a3	Slc37a2	10090.ENSMUSP00000025646	10090.ENSMUSP00000124569	0	0	0	0	0.182	0.077	0	0.715	0.766
Slc2a12	Slc5a1	10090.ENSMUSP00000043962	10090.ENSMUSP00000011178	0	0	0	0	0.062	0.042	0	0.667	0.675
Slc2a3	Slc5a1	10090.ENSMUSP00000032476	10090.ENSMUSP00000011178	0	0	0	0	0.062	0.046	0	0.636	0.646
Slc2a3	Slc7a8	10090.ENSMUSP00000032476	10090.ENSMUSP00000022787	0	0	0	0	0.062	0.06	0	0.377	0.403
Slc2a3	Trim2	10090.ENSMUSP00000032476	10090.ENSMUSP00000069922	0	0	0	0	0	0	0	0.405	0.405
Slc5a1	Slc5a8	10090.ENSMUSP00000011178	10090.ENSMUSP00000020255	0	0	0.439	0.574	0.1	0	0	0.503	0.411
Slc5a1	Slc6a1	10090.ENSMUSP00000011178	10090.ENSMUSP00000032454	0	0	0	0	0	0	0	0.511	0.511
Slc7a11	Slc7a8	10090.ENSMUSP00000029297	10090.ENSMUSP00000022787	0	0	0.447	0.92	0	0	0.6	0.366	0.624
Slfn4	Trim30b	10090.ENSMUSP00000000208	10090.ENSMUSP00000102444	0	0	0	0	0.057	0.043	0	0.394	0.405
Slpi	Tnf	10090.ENSMUSP00000104992	10090.ENSMUSP00000025263	0	0	0	0	0.086	0	0	0.5	0.523
Slpi	Wfdc12	10090.ENSMUSP00000104992	10090.ENSMUSP00000050836	0	0	0	0	0	0	0	0.466	0.465
Slpi	Sprr2h	10090.ENSMUSP00000104992	10090.ENSMUSP00000053849	0	0	0	0	0	0	0	0.463	0.463
Snap91	Zcchc12	10090.ENSMUSP00000096096	10090.ENSMUSP00000110913	0	0	0	0	0.406	0	0	0	0.406
Spp1	Timp1	10090.ENSMUSP00000108367	10090.ENSMUSP00000009530	0	0	0	0	0.381	0	0	0.624	0.757
Spp1	Tnf	10090.ENSMUSP00000108367	10090.ENSMUSP00000025263	0	0	0	0	0.064	0	0	0.698	0.705
Spp1	Vcam1	10090.ENSMUSP00000108367	10090.ENSMUSP00000029574	0	0	0	0	0.061	0	0	0.637	0.645
Spp1	Thbs1	10090.ENSMUSP00000108367	10090.ENSMUSP00000044903	0	0	0	0	0.105	0	0.5	0.552	0.782
Spp1	Tlr7	10090.ENSMUSP00000108367	10090.ENSMUSP00000061853	0	0	0	0	0.067	0.044	0	0.414	0.432
Sprr1b	Sprr2h	10090.ENSMUSP00000058617	10090.ENSMUSP00000053849	0	0	0	0	0.256	0	0	0.266	0.431
Sprr2d	Sprr2e	10090.ENSMUSP00000039821	10090.ENSMUSP00000064652	0	0	0	0	0.203	0	0	0.552	0.627
Sprr2d	Sprr2h	10090.ENSMUSP00000039821	10090.ENSMUSP00000053849	0	0	0	0	0.392	0	0	0.699	0.809
Srgn	Tyrobp	10090.ENSMUSP00000125622	10090.ENSMUSP00000032800	0	0	0	0	0.485	0	0	0.11	0.522
Srgn	Vsig4	10090.ENSMUSP00000125622	10090.ENSMUSP00000051521	0	0	0	0	0.08	0	0	0.412	0.436
Stat4	Tnf	10090.ENSMUSP00000027277	10090.ENSMUSP00000025263	0	0	0	0	0.061	0	0.35	0.601	0.735
Stat4	Tlr7	10090.ENSMUSP00000027277	10090.ENSMUSP00000061853	0	0	0	0	0	0.089	0	0.384	0.415
Stfa2	Stfa3	10090.ENSMUSP00000023619	10090.ENSMUSP00000067445	0	0	0	0.966	0.409	0	0	0	0.408
Thbs1	Timp1	10090.ENSMUSP00000044903	10090.ENSMUSP00000009530	0	0	0	0	0.177	0	0	0.612	0.667
Thbs1	Tnf	10090.ENSMUSP00000044903	10090.ENSMUSP00000025263	0	0	0	0	0	0	0	0.585	0.585
Thbs1	Vcam1	10090.ENSMUSP00000044903	10090.ENSMUSP00000029574	0	0	0	0	0.093	0	0.676	0.464	0.828
Timp1	Vcam1	10090.ENSMUSP00000009530	10090.ENSMUSP00000029574	0	0	0	0	0.079	0	0	0.584	0.6
Timp1	Tnf	10090.ENSMUSP00000009530	10090.ENSMUSP00000025263	0	0	0	0	0.048	0	0	0.738	0.739
Tlr7	Trem2	10090.ENSMUSP00000061853	10090.ENSMUSP00000024791	0	0	0	0	0.283	0	0	0.245	0.436
Tlr7	Tnf	10090.ENSMUSP00000061853	10090.ENSMUSP00000025263	0	0	0	0	0.161	0.044	0.144	0.813	0.855
Tlr7	Vcam1	10090.ENSMUSP00000061853	10090.ENSMUSP00000029574	0	0	0	0	0.525	0	0	0.327	0.666
Tlr7	Tyrobp	10090.ENSMUSP00000061853	10090.ENSMUSP00000032800	0	0	0	0	0.416	0	0	0.382	0.623
Tlr7	Tlr8	10090.ENSMUSP00000061853	10090.ENSMUSP00000107793	0	0	0	0.904	0.209	0.13	0.8	0.93	0.863
Tlr8	Tnf	10090.ENSMUSP00000107793	10090.ENSMUSP00000025263	0	0	0	0	0.124	0.044	0.144	0.7	0.756
Tlr8	Tyrobp	10090.ENSMUSP00000107793	10090.ENSMUSP00000032800	0	0	0	0	0.271	0	0	0.223	0.409
Tmem37	Vipr1	10090.ENSMUSP00000050862	10090.ENSMUSP00000035115	0	0	0	0	0	0	0	0.483	0.483
Tnf	Trem2	10090.ENSMUSP00000025263	10090.ENSMUSP00000024791	0	0	0	0	0.102	0	0	0.591	0.617
Tnf	Tyrobp	10090.ENSMUSP00000025263	10090.ENSMUSP00000032800	0	0	0	0	0.18	0	0	0.552	0.617
Tnf	Vcam1	10090.ENSMUSP00000025263	10090.ENSMUSP00000029574	0	0	0	0	0	0	0.676	0.863	0.953
Trem2	Treml4	10090.ENSMUSP00000024791	10090.ENSMUSP00000118772	0	0	0	0.623	0.122	0	0.3	0.619	0.504
Trem2	Trem3	10090.ENSMUSP00000024791	10090.ENSMUSP00000044478	0	0	0	0	0.122	0	0	0.795	0.812
Trem2	Tyrobp	10090.ENSMUSP00000024791	10090.ENSMUSP00000032800	0	0	0	0	0.455	0.402	0.8	0.989	0.999
Trem3	Tyrobp	10090.ENSMUSP00000044478	10090.ENSMUSP00000032800	0	0	0	0	0.162	0.461	0	0.907	0.954
Trem3	Treml4	10090.ENSMUSP00000044478	10090.ENSMUSP00000118772	0	0	0	0	0.192	0	0	0.694	0.742
Treml4	Tyrobp	10090.ENSMUSP00000118772	10090.ENSMUSP00000032800	0	0	0	0	0.244	0.208	0	0.807	0.875
Tyrobp	Vsig4	10090.ENSMUSP00000032800	10090.ENSMUSP00000051521	0	0	0	0	0.373	0	0	0.129	0.43
Wfdc12	Wfdc18	10090.ENSMUSP00000050836	10090.ENSMUSP00000001009	0	0	0	0	0	0	0	0.532	0.532
Wnt10b	Wnt7a	10090.ENSMUSP00000023732	10090.ENSMUSP00000032180	0	0	0	0.896	0.058	0	0.9	0.715	0.908

## Sheet: Figure 4B
Results ranked by Degree				Cytoscape: An Open Source Platform for Complex Network Analysis and Visualization
cytoNCA
1	Tnf	Degree: 83.0		Eigenvector: 0.26195833		Betweenness: 21506.832		Closeness: 0.02705314
2	Il1b	Degree: 67.0		Eigenvector: 0.25023615		Betweenness: 8435.499		Closeness: 0.026965505
3	Il10	Degree: 54.0		Eigenvector: 0.21382217		Betweenness: 3880.648		Closeness: 0.026892517
4	Tyrobp	Degree: 50.0		Eigenvector: 0.18765359		Betweenness: 4561.2397		Closeness: 0.026768642
5	Tlr7	Degree: 45.0		Eigenvector: 0.19411792		Betweenness: 3415.1936		Closeness: 0.026761664
6	Ccl3	Degree: 43.0		Eigenvector: 0.20415482		Betweenness: 1759.3976		Closeness: 0.02683862
7	Ccl4	Degree: 40.0		Eigenvector: 0.18332827		Betweenness: 2111.9814		Closeness: 0.026812918
8	Cd14	Degree: 39.0		Eigenvector: 0.19568793		Betweenness: 706.19434		Closeness: 0.02674772
9	Fcer1g	Degree: 39.0		Eigenvector: 0.16619606		Betweenness: 2991.3555		Closeness: 0.026738431
10	Irf7	Degree: 36.0		Eigenvector: 0.122058466		Betweenness: 2381.8206		Closeness: 0.026645904
11	Cybb	Degree: 35.0		Eigenvector: 0.15858734		Betweenness: 3042.4385		Closeness: 0.026699029
12	Cxcl2	Degree: 34.0		Eigenvector: 0.15951483		Betweenness: 742.0656		Closeness: 0.02675934
13	Vcam1	Degree: 34.0		Eigenvector: 0.15222517		Betweenness: 1380.3291		Closeness: 0.026740754
14	Lcp2	Degree: 33.0		Eigenvector: 0.12800819		Betweenness: 2351.187		Closeness: 0.02672915
15	Isg15	Degree: 31.0		Eigenvector: 0.09135366		Betweenness: 2010.0707		Closeness: 0.026627475
16	Ifit1	Degree: 31.0		Eigenvector: 0.0843022		Betweenness: 1537.2795		Closeness: 0.026629778
17	Ptgs2	Degree: 31.0		Eigenvector: 0.121451296		Betweenness: 2648.2153		Closeness: 0.02670366
18	Plek	Degree: 31.0		Eigenvector: 0.13326417		Betweenness: 1851.7427		Closeness: 0.026696716
19	Rsad2	Degree: 31.0		Eigenvector: 0.0826115		Betweenness: 1836.0405		Closeness: 0.02663208
20	Igsf6	Degree: 29.0		Eigenvector: 0.122562		Betweenness: 693.31116		Closeness: 0.02660907
21	Clec4d	Degree: 29.0		Eigenvector: 0.131585		Betweenness: 1119.0446		Closeness: 0.026599878
22	Trem2	Degree: 28.0		Eigenvector: 0.11297893		Betweenness: 2025.0144		Closeness: 0.026687462
23	Slc11a1	Degree: 27.0		Eigenvector: 0.13080913		Betweenness: 1191.2404		Closeness: 0.026668975
24	Mmp13	Degree: 26.0		Eigenvector: 0.09011746		Betweenness: 4141.288		Closeness: 0.026678216
25	Oasl1	Degree: 26.0		Eigenvector: 0.06314619		Betweenness: 1146.1143		Closeness: 0.026602177
26	Clec4n	Degree: 25.0		Eigenvector: 0.1373793		Betweenness: 285.54507		Closeness: 0.026636686
27	Oas2	Degree: 25.0		Eigenvector: 0.05573489		Betweenness: 370.05124		Closeness: 0.026406035
28	Oasl2	Degree: 25.0		Eigenvector: 0.05827601		Betweenness: 926.6495		Closeness: 0.026595285
29	Ms4a6d	Degree: 25.0		Eigenvector: 0.112472		Betweenness: 161.64975		Closeness: 0.026519718
30	Ifi44	Degree: 24.0		Eigenvector: 0.042444624		Betweenness: 68.403786		Closeness: 0.026172671
31	Ly86	Degree: 24.0		Eigenvector: 0.102540426		Betweenness: 419.6854		Closeness: 0.026556304
32	Spp1	Degree: 23.0		Eigenvector: 0.10780739		Betweenness: 1111.9132		Closeness: 0.026712922
33	Cd53	Degree: 23.0		Eigenvector: 0.09748095		Betweenness: 209.10149		Closeness: 0.02653571
34	Ncf2	Degree: 23.0		Eigenvector: 0.10620931		Betweenness: 308.26233		Closeness: 0.026659742
35	Slc15a3	Degree: 23.0		Eigenvector: 0.11468496		Betweenness: 821.7031		Closeness: 0.026583808
36	Timp1	Degree: 22.0		Eigenvector: 0.100113615		Betweenness: 410.71976		Closeness: 0.026602177
37	Nlrp3	Degree: 22.0		Eigenvector: 0.12166656		Betweenness: 187.36359		Closeness: 0.026678216
38	Msr1	Degree: 21.0		Eigenvector: 0.111594945		Betweenness: 444.75204		Closeness: 0.026604474
39	Ccl6	Degree: 20.0		Eigenvector: 0.08435104		Betweenness: 1467.5642		Closeness: 0.026602177
40	Csf3	Degree: 19.0		Eigenvector: 0.10387111		Betweenness: 578.9917		Closeness: 0.026581515
41	Tlr8	Degree: 19.0		Eigenvector: 0.11332775		Betweenness: 130.56175		Closeness: 0.026645904
42	Lcn2	Degree: 19.0		Eigenvector: 0.087076545		Betweenness: 509.2116		Closeness: 0.026567757
43	Herc6	Degree: 19.0		Eigenvector: 0.03727106		Betweenness: 25.132246		Closeness: 0.02614823
44	Cmpk2	Degree: 19.0		Eigenvector: 0.034397103		Betweenness: 1144.0243		Closeness: 0.026170447
45	Ms4a6c	Degree: 19.0		Eigenvector: 0.08051364		Betweenness: 596.49066		Closeness: 0.026399245
46	Alox5ap	Degree: 19.0		Eigenvector: 0.078311376		Betweenness: 573.80396		Closeness: 0.026537998
47	Irg1	Degree: 18.0		Eigenvector: 0.08666962		Betweenness: 1537.8053		Closeness: 0.026627475
48	Clec4e	Degree: 18.0		Eigenvector: 0.111531004		Betweenness: 50.696823		Closeness: 0.026597582
49	Rgs1	Degree: 18.0		Eigenvector: 0.068722725		Betweenness: 591.5778		Closeness: 0.026494624
50	Epsti1	Degree: 17.0		Eigenvector: 0.03835892		Betweenness: 403.06168		Closeness: 0.026322536
51	Cd84	Degree: 17.0		Eigenvector: 0.06573734		Betweenness: 532.76886		Closeness: 0.026458208
52	Oas3	Degree: 17.0		Eigenvector: 0.03537887		Betweenness: 12.199384		Closeness: 0.026143791
53	Bst2	Degree: 17.0		Eigenvector: 0.04530172		Betweenness: 211.99654		Closeness: 0.026313541
54	Saa3	Degree: 17.0		Eigenvector: 0.08354414		Betweenness: 339.82242		Closeness: 0.026572341
55	Col1a1	Degree: 16.0		Eigenvector: 0.046480604		Betweenness: 1060.1538		Closeness: 0.026597582
56	Samd9l	Degree: 16.0		Eigenvector: 0.03139598		Betweenness: 151.81606		Closeness: 0.026137136
57	Oas1g	Degree: 16.0		Eigenvector: 0.031977896		Betweenness: 80.21789		Closeness: 0.026188249
58	Sp100	Degree: 15.0		Eigenvector: 0.03215975		Betweenness: 9.57357		Closeness: 0.026121618
59	Krt19	Degree: 15.0		Eigenvector: 0.019383598		Betweenness: 7355.363		Closeness: 0.026606772
60	Lpxn	Degree: 15.0		Eigenvector: 0.060275156		Betweenness: 2123.6394		Closeness: 0.02647868
61	Ccr1	Degree: 14.0		Eigenvector: 0.0906974		Betweenness: 27.047363		Closeness: 0.026567757
62	Cxcl3	Degree: 14.0		Eigenvector: 0.07982877		Betweenness: 39.03116		Closeness: 0.026565464
63	Ifitm3	Degree: 14.0		Eigenvector: 0.034674276		Betweenness: 64.70856		Closeness: 0.026250746
64	Hp	Degree: 14.0		Eigenvector: 0.053382333		Betweenness: 1848.5159		Closeness: 0.026560884
65	Srgn	Degree: 14.0		Eigenvector: 0.06279486		Betweenness: 1450.3107		Closeness: 0.026599878
66	Xaf1	Degree: 13.0		Eigenvector: 0.029711504		Betweenness: 2.4759824		Closeness: 0.026097272
67	Ncf1	Degree: 13.0		Eigenvector: 0.07585185		Betweenness: 54.41534		Closeness: 0.026588397
68	Serpinb3c	Degree: 13.0		Eigenvector: 0.07758669		Betweenness: 2158.519		Closeness: 0.026581515
69	Osm	Degree: 13.0		Eigenvector: 0.06581428		Betweenness: 271.0883		Closeness: 0.026583808
70	C5ar1	Degree: 13.0		Eigenvector: 0.08082158		Betweenness: 189.81517		Closeness: 0.026590694
71	Samhd1	Degree: 13.0		Eigenvector: 0.036866944		Betweenness: 24.769176		Closeness: 0.026252983
72	Lgals3bp	Degree: 13.0		Eigenvector: 0.030106891		Betweenness: 2.6495585		Closeness: 0.02611276
73	Gfap	Degree: 13.0		Eigenvector: 0.046617262		Betweenness: 7001.2393		Closeness: 0.026657434
74	Mmp10	Degree: 13.0		Eigenvector: 0.057359222		Betweenness: 735.54224		Closeness: 0.026590694
75	Thbs1	Degree: 12.0		Eigenvector: 0.057725795		Betweenness: 20.25493		Closeness: 0.026558593
76	S100a8	Degree: 12.0		Eigenvector: 0.0596521		Betweenness: 27.531536		Closeness: 0.026533425
77	Ms4a6b	Degree: 12.0		Eigenvector: 0.048710477		Betweenness: 201.4264		Closeness: 0.02637438
78	Clec5a	Degree: 12.0		Eigenvector: 0.06244466		Betweenness: 105.989265		Closeness: 0.026565464
79	Siglec1	Degree: 12.0		Eigenvector: 0.07418214		Betweenness: 59.380043		Closeness: 0.02661597
80	Cxcr2	Degree: 12.0		Eigenvector: 0.07152281		Betweenness: 283.16644		Closeness: 0.026556304
81	Serpinb6e	Degree: 12.0		Eigenvector: 0.07744988		Betweenness: 192.4186		Closeness: 0.026533425
82	Havcr2	Degree: 12.0		Eigenvector: 0.071642876		Betweenness: 180.78004		Closeness: 0.026572341
83	Rptn	Degree: 12.0		Eigenvector: 0.0013487966		Betweenness: 1566.0359		Closeness: 0.02608622
84	Ifi27l2a	Degree: 12.0		Eigenvector: 0.02735564		Betweenness: 3.0689626		Closeness: 0.026108332
85	Gm14446	Degree: 12.0		Eigenvector: 0.02061085		Betweenness: 457.8709		Closeness: 0.026121618
86	Slfn4	Degree: 12.0		Eigenvector: 0.02277652		Betweenness: 206.0619		Closeness: 0.02616378
87	Chil3	Degree: 12.0		Eigenvector: 0.071291976		Betweenness: 25.43601		Closeness: 0.02654486
88	Alox15	Degree: 12.0		Eigenvector: 0.044224616		Betweenness: 646.73914		Closeness: 0.02652657
89	Krt4	Degree: 11.0		Eigenvector: 0.0013624536		Betweenness: 579.4611		Closeness: 0.02615489
90	Plaur	Degree: 11.0		Eigenvector: 0.04310965		Betweenness: 1106.7888		Closeness: 0.026549436
91	Il1f6	Degree: 11.0		Eigenvector: 0.053467028		Betweenness: 1227.8945		Closeness: 0.026590694
92	Col1a2	Degree: 11.0		Eigenvector: 0.02794994		Betweenness: 324.4621		Closeness: 0.026512869
93	Oas1a	Degree: 11.0		Eigenvector: 0.024813144		Betweenness: 5.2113495		Closeness: 0.026099483
94	S100a9	Degree: 11.0		Eigenvector: 0.04746438		Betweenness: 540.4805		Closeness: 0.026551723
95	Fmod	Degree: 11.0		Eigenvector: 0.024914704		Betweenness: 821.48663		Closeness: 0.026540285
96	Apol9b	Degree: 11.0		Eigenvector: 0.01389927		Betweenness: 891.81366		Closeness: 0.026130483
97	Apol9a	Degree: 11.0		Eigenvector: 0.023094775		Betweenness: 225.43658		Closeness: 0.02614601
98	Adam8	Degree: 11.0		Eigenvector: 0.05617991		Betweenness: 17.707237		Closeness: 0.026437769
99	Krt6b	Degree: 10.0		Eigenvector: 0.0011589543		Betweenness: 281.77377		Closeness: 0.026097272
100	Krt77	Degree: 10.0		Eigenvector: 0.0011233408		Betweenness: 309.9321		Closeness: 0.02608622
101	Krt84	Degree: 10.0		Eigenvector: 0.0011914		Betweenness: 385.1621		Closeness: 0.02611276
102	Cnfn	Degree: 10.0		Eigenvector: 0.0034865758		Betweenness: 2032.0186		Closeness: 0.026103906
103	Hcar2	Degree: 10.0		Eigenvector: 0.050813112		Betweenness: 1632.0966		Closeness: 0.026551723
104	Bcan	Degree: 10.0		Eigenvector: 0.01160321		Betweenness: 3805.0369		Closeness: 0.02631579
105	Fpr3	Degree: 10.0		Eigenvector: 0.049594343		Betweenness: 293.1922		Closeness: 0.026551723
106	Krt15	Degree: 9.0		Eigenvector: 0.0011102774		Betweenness: 545.0548		Closeness: 0.026084011
107	Krt32	Degree: 9.0		Eigenvector: 0.0011192361		Betweenness: 75.712		Closeness: 0.026084011
108	Krt75	Degree: 9.0		Eigenvector: 0.0013749459		Betweenness: 169.74591		Closeness: 0.026121618
109	Gnao1	Degree: 9.0		Eigenvector: 0.010512082		Betweenness: 1140.4019		Closeness: 0.02625746
110	Samsn1	Degree: 9.0		Eigenvector: 0.029196057		Betweenness: 627.78503		Closeness: 0.026442308
111	Gm5414	Degree: 8.0		Eigenvector: 0.0015228759		Betweenness: 39.54127		Closeness: 0.026077386
112	Pmel	Degree: 8.0		Eigenvector: 0.03247067		Betweenness: 175.82005		Closeness: 0.026499182
113	Slc5a1	Degree: 7.0		Eigenvector: 9.4126794E-4		Betweenness: 2728.5308		Closeness: 0.02615267
114	Stat4	Degree: 7.0		Eigenvector: 0.041931044		Betweenness: 20.245836		Closeness: 0.026537998
115	Il1f8	Degree: 7.0		Eigenvector: 0.029324973		Betweenness: 775.1777		Closeness: 0.026549436
116	Slpi	Degree: 7.0		Eigenvector: 0.032939535		Betweenness: 1699.6237		Closeness: 0.026510587
117	Sprr2h	Degree: 7.0		Eigenvector: 0.001523845		Betweenness: 545.2208		Closeness: 0.02608622
118	Shc3	Degree: 7.0		Eigenvector: 0.0077048554		Betweenness: 1474.7998		Closeness: 0.026277622
119	Pdgfrl	Degree: 7.0		Eigenvector: 0.0049388255		Betweenness: 208.4269		Closeness: 0.026137136
120	Trem3	Degree: 7.0		Eigenvector: 0.024165643		Betweenness: 566.1017		Closeness: 0.026403772
121	Ms4a7	Degree: 7.0		Eigenvector: 0.03348764		Betweenness: 2.1029837		Closeness: 0.026210535
122	Cd300a	Degree: 7.0		Eigenvector: 0.030793		Betweenness: 546.9566		Closeness: 0.026270898
123	Ripk3	Degree: 7.0		Eigenvector: 0.051313523		Betweenness: 2.8905163		Closeness: 0.02653114
124	Ptges	Degree: 7.0		Eigenvector: 0.04154168		Betweenness: 25.784752		Closeness: 0.02653114
125	Pla2g4d	Degree: 7.0		Eigenvector: 0.007943751		Betweenness: 434.3723		Closeness: 0.026143791
126	Cyp2b23	Degree: 7.0		Eigenvector: 0.00780209		Betweenness: 998.91656		Closeness: 0.026137136
127	Cyp4f18	Degree: 7.0		Eigenvector: 0.013963424		Betweenness: 145.84743		Closeness: 0.026273139
128	Sprr2e	Degree: 6.0		Eigenvector: 2.8017777E-4		Betweenness: 28.174011		Closeness: 0.025664529
129	Lce3f	Degree: 6.0		Eigenvector: 6.678798E-4		Betweenness: 309.97598		Closeness: 0.025954327
130	Serpina3n	Degree: 6.0		Eigenvector: 0.03461895		Betweenness: 3.6240187		Closeness: 0.026506023
131	Grn	Degree: 6.0		Eigenvector: 0.02466374		Betweenness: 528.4559		Closeness: 0.026572341
132	Pyhin1	Degree: 6.0		Eigenvector: 0.014176179		Betweenness: 13.847742		Closeness: 0.026141573
133	Col11a1	Degree: 6.0		Eigenvector: 0.0077609504		Betweenness: 27.353903		Closeness: 0.026159335
134	Edn3	Degree: 6.0		Eigenvector: 0.007060969		Betweenness: 271.57855		Closeness: 0.026192704
135	Stfa3	Degree: 6.0		Eigenvector: 0.0038972993		Betweenness: 848.37244		Closeness: 0.026141573
136	Tgm3	Degree: 6.0		Eigenvector: 0.0051182164		Betweenness: 512.57764		Closeness: 0.02622839
137	Ncan	Degree: 6.0		Eigenvector: 0.0034232792		Betweenness: 985.3638		Closeness: 0.026174895
138	Alox12e	Degree: 6.0		Eigenvector: 0.010722779		Betweenness: 52.767567		Closeness: 0.026268657
139	Pinlyp	Degree: 5.0		Eigenvector: 0.012678205		Betweenness: 1390.8877		Closeness: 0.026302306
140	Sprr2d	Degree: 5.0		Eigenvector: 0.002265904		Betweenness: 282.62766		Closeness: 0.026117189
141	Treml4	Degree: 5.0		Eigenvector: 0.017724209		Betweenness: 26.31755		Closeness: 0.026214996
142	Slc13a3	Degree: 5.0		Eigenvector: 1.302312E-4		Betweenness: 156.81639		Closeness: 0.025655977
143	Ly9	Degree: 5.0		Eigenvector: 0.027006494		Betweenness: 1.0378808		Closeness: 0.02630006
144	Dct	Degree: 5.0		Eigenvector: 0.007695888		Betweenness: 96.45099		Closeness: 0.026079593
145	Tnmd	Degree: 5.0		Eigenvector: 0.00762646		Betweenness: 8.719831		Closeness: 0.026157113
146	Sprr1b	Degree: 5.0		Eigenvector: 3.0875547E-4		Betweenness: 69.56448		Closeness: 0.025711661
147	Lce3c	Degree: 5.0		Eigenvector: 2.7304978E-4		Betweenness: 178.09529		Closeness: 0.025724547
148	Serpinb3a	Degree: 5.0		Eigenvector: 0.0034093424		Betweenness: 438.2861		Closeness: 0.026059734
149	Sirpb1a	Degree: 5.0		Eigenvector: 0.021655701		Betweenness: 3.4886446		Closeness: 0.026210535
150	Casp14	Degree: 5.0		Eigenvector: 0.020475978		Betweenness: 1722.247		Closeness: 0.026524285
151	Vsig4	Degree: 5.0		Eigenvector: 0.019493349		Betweenness: 545.1886		Closeness: 0.0262418
152	Ntrk3	Degree: 5.0		Eigenvector: 0.0021385408		Betweenness: 1694.464		Closeness: 0.026137136
153	Stx11	Degree: 5.0		Eigenvector: 0.0039804247		Betweenness: 814.9785		Closeness: 0.026079593
154	Trim30b	Degree: 5.0		Eigenvector: 0.003193315		Betweenness: 7.074745		Closeness: 0.025651703
155	Ptn	Degree: 5.0		Eigenvector: 6.1752193E-4		Betweenness: 4020.8499		Closeness: 0.025832424
156	Slc2a3	Degree: 4.0		Eigenvector: 6.42704E-5		Betweenness: 1129.009		Closeness: 0.025675226
157	Stfa2	Degree: 4.0		Eigenvector: 6.785465E-4		Betweenness: 328.82767		Closeness: 0.025886703
158	Slc5a8	Degree: 4.0		Eigenvector: 0.0020366213		Betweenness: 806.1874		Closeness: 0.02606194
159	Rgs11	Degree: 4.0		Eigenvector: 0.008649622		Betweenness: 12.436451		Closeness: 0.02615489
160	Rgs9	Degree: 4.0		Eigenvector: 0.008649622		Betweenness: 12.436451		Closeness: 0.02615489
161	Gjb6	Degree: 4.0		Eigenvector: 0.0019808712		Betweenness: 1354.481		Closeness: 0.026079593
162	Slc6a1	Degree: 4.0		Eigenvector: 0.0022952615		Betweenness: 701.3037		Closeness: 0.026183797
163	Gjb2	Degree: 4.0		Eigenvector: 0.0036274826		Betweenness: 796.28937		Closeness: 0.026114974
164	Wnt10b	Degree: 4.0		Eigenvector: 5.50484E-4		Betweenness: 546.8929		Closeness: 0.025901943
165	Col4a6	Degree: 4.0		Eigenvector: 0.0034196533		Betweenness: 0.0		Closeness: 0.026022306
166	Lce3d	Degree: 4.0		Eigenvector: 3.4280526E-4		Betweenness: 26.032087		Closeness: 0.025664529
167	Chil1	Degree: 4.0		Eigenvector: 0.026063386		Betweenness: 0.45		Closeness: 0.026451392
168	Slc7a11	Degree: 4.0		Eigenvector: 0.0018511422		Betweenness: 513.44653		Closeness: 0.026053121
169	Serpinb12	Degree: 4.0		Eigenvector: 9.039878E-5		Betweenness: 560.0476		Closeness: 0.025568653
170	Nrg1	Degree: 4.0		Eigenvector: 0.010141366		Betweenness: 1019.5378		Closeness: 0.026406035
171	Abcg1	Degree: 4.0		Eigenvector: 0.026210235		Betweenness: 148.48242		Closeness: 0.026467303
172	Slc15a2	Degree: 3.0		Eigenvector: 4.550882E-5		Betweenness: 32.374218		Closeness: 0.025575023
173	Pdzk1	Degree: 3.0		Eigenvector: 8.6887405E-5		Betweenness: 7.936354		Closeness: 0.02548614
174	Notum	Degree: 3.0		Eigenvector: 3.0136787E-5		Betweenness: 85.25601		Closeness: 0.025379037
175	Skint4	Degree: 3.0		Eigenvector: 1.08242755E-4		Betweenness: 5.3333335		Closeness: 0.025596278
176	Lgmn	Degree: 3.0		Eigenvector: 0.010602858		Betweenness: 27.78779		Closeness: 0.026214996
177	H2-M5	Degree: 3.0		Eigenvector: 0.016770435		Betweenness: 0.0		Closeness: 0.026252983
178	Hepacam2	Degree: 3.0		Eigenvector: 0.002481485		Betweenness: 66.54398		Closeness: 0.02604431
179	Tmem37	Degree: 3.0		Eigenvector: 0.0		Betweenness: 6.0		Closeness: 0.003267974
180	Slc37a2	Degree: 3.0		Eigenvector: 0.005148982		Betweenness: 495.0779		Closeness: 0.026077386
181	Wnt7a	Degree: 3.0		Eigenvector: 1.6276636E-4		Betweenness: 75.095505		Closeness: 0.025519928
182	Frzb	Degree: 3.0		Eigenvector: 0.0035622704		Betweenness: 686.14355		Closeness: 0.02608622
183	Snap91	Degree: 3.0		Eigenvector: 1.0425728E-4		Betweenness: 1086.0		Closeness: 0.025410445
184	Dnajc6	Degree: 3.0		Eigenvector: 0.0026621115		Betweenness: 1630.1545		Closeness: 0.025984982
185	Stra6	Degree: 3.0		Eigenvector: 1.5552144E-9		Betweenness: 1086.0		Closeness: 0.0237343
186	Gm11710	Degree: 3.0		Eigenvector: 0.005662563		Betweenness: 24.03441		Closeness: 0.0261327
187	Gsta4	Degree: 3.0		Eigenvector: 3.7171406E-4		Betweenness: 96.36896		Closeness: 0.025668805
188	Ier3	Degree: 3.0		Eigenvector: 0.016718607		Betweenness: 287.2573		Closeness: 0.026442308
189	Fbxo32	Degree: 3.0		Eigenvector: 0.012148328		Betweenness: 183.37022		Closeness: 0.026462754
190	Lce3e	Degree: 3.0		Eigenvector: 3.2378364E-4		Betweenness: 6.315629		Closeness: 0.025651703
191	Upp1	Degree: 3.0		Eigenvector: 0.0013581449		Betweenness: 654.5156		Closeness: 0.025630357
192	Gm9733	Degree: 3.0		Eigenvector: 0.0074611516		Betweenness: 346.52478		Closeness: 0.026186023
193	Frmd3	Degree: 3.0		Eigenvector: 0.0		Betweenness: 6.0		Closeness: 0.003267974
194	Cd300ld	Degree: 3.0		Eigenvector: 0.014119253		Betweenness: 9.384534		Closeness: 0.026174895
195	Epgn	Degree: 3.0		Eigenvector: 4.734472E-4		Betweenness: 112.76283		Closeness: 0.025943397
196	Pmaip1	Degree: 3.0		Eigenvector: 0.016498357		Betweenness: 544.0		Closeness: 0.026460482
197	Tnc	Degree: 3.0		Eigenvector: 0.0029465086		Betweenness: 165.14677		Closeness: 0.026037704
198	Cspg5	Degree: 3.0		Eigenvector: 6.141594E-4		Betweenness: 0.0		Closeness: 0.02575897
199	Mmp19	Degree: 3.0		Eigenvector: 0.0066310335		Betweenness: 13.49801		Closeness: 0.026099483
200	Gpm6a	Degree: 3.0		Eigenvector: 5.0279585E-4		Betweenness: 544.0		Closeness: 0.025769746
201	Aqp3	Degree: 3.0		Eigenvector: 0.0063738828		Betweenness: 1150.542		Closeness: 0.026114974
202	Pydc4	Degree: 3.0		Eigenvector: 0.0014701907		Betweenness: 0.0		Closeness: 0.025585646
203	Rbp2	Degree: 3.0		Eigenvector: 3.8023845E-8		Betweenness: 2158.0		Closeness: 0.024234794
204	Adap2	Degree: 3.0		Eigenvector: 0.008453326		Betweenness: 550.13275		Closeness: 0.02622839
205	Wfdc12	Degree: 2.0		Eigenvector: 0.0012927382		Betweenness: 544.0		Closeness: 0.02590848
206	Slc7a8	Degree: 2.0		Eigenvector: 7.495967E-5		Betweenness: 101.287315		Closeness: 0.025589896
207	Nkd1	Degree: 2.0		Eigenvector: 5.4014097E-5		Betweenness: 76.70296		Closeness: 0.025116203
208	Ms4a4a	Degree: 2.0		Eigenvector: 0.011763697		Betweenness: 0.0		Closeness: 0.026190476
209	Stfa2l1	Degree: 2.0		Eigenvector: 5.2200124E-4		Betweenness: 0.0		Closeness: 0.025787005
210	Klk9	Degree: 2.0		Eigenvector: 0.0017171893		Betweenness: 103.672646		Closeness: 0.026020106
211	Tfec	Degree: 2.0		Eigenvector: 0.008802024		Betweenness: 0.0		Closeness: 0.02604431
212	Gm28042	Degree: 2.0		Eigenvector: 4.6786317E-4		Betweenness: 0.0		Closeness: 0.025647432
213	Hepacam	Degree: 2.0		Eigenvector: 7.7920464E-5		Betweenness: 544.0		Closeness: 0.02549669
214	Gjc3	Degree: 2.0		Eigenvector: 2.2030443E-4		Betweenness: 0.0		Closeness: 0.02559415
215	Fxyd4	Degree: 2.0		Eigenvector: 2.0649678E-4		Betweenness: 60.94624		Closeness: 0.025613306
216	Fabp7	Degree: 2.0		Eigenvector: 0.001829602		Betweenness: 514.8629		Closeness: 0.026050918
217	Pls1	Degree: 2.0		Eigenvector: 7.670999E-4		Betweenness: 153.42218		Closeness: 0.02601571
218	Espn	Degree: 2.0		Eigenvector: 1.7265929E-4		Betweenness: 21.168991		Closeness: 0.025638891
219	Edar	Degree: 2.0		Eigenvector: 0.010286582		Betweenness: 909.2855		Closeness: 0.026442308
220	Snrpn	Degree: 2.0		Eigenvector: 0.0		Betweenness: 2.0		Closeness: 0.0032573289
221	Ugt8a	Degree: 2.0		Eigenvector: 0.0		Betweenness: 4.0		Closeness: 0.0032679392
222	Gsta1	Degree: 2.0		Eigenvector: 3.208574E-4		Betweenness: 0.0		Closeness: 0.025587771
223	Sirpb1c	Degree: 2.0		Eigenvector: 0.0073643476		Betweenness: 255.62987		Closeness: 0.02615489
224	Clec4a1	Degree: 2.0		Eigenvector: 5.797206E-4		Betweenness: 1.7254902		Closeness: 0.025598405
225	Fgfr4	Degree: 2.0		Eigenvector: 3.0519738E-4		Betweenness: 52.738262		Closeness: 0.02568593
226	Cdh4	Degree: 2.0		Eigenvector: 9.584185E-5		Betweenness: 18.360329		Closeness: 0.025551684
227	Gm15448	Degree: 2.0		Eigenvector: 0.007053847		Betweenness: 0.0		Closeness: 0.026123833
228	Nmu	Degree: 2.0		Eigenvector: 0.0035780803		Betweenness: 0.0		Closeness: 0.026042107
229	Cbs	Degree: 2.0		Eigenvector: 0.01033737		Betweenness: 406.83746		Closeness: 0.026440037
230	Cacna1g	Degree: 2.0		Eigenvector: 0.0		Betweenness: 4.0		Closeness: 0.0032679392
231	C130026I21Rik	Degree: 2.0		Eigenvector: 0.0		Betweenness: 2.0		Closeness: 0.0032573289
232	Btc	Degree: 2.0		Eigenvector: 4.158277E-4		Betweenness: 0.0		Closeness: 0.025851939
233	Gprasp2	Degree: 2.0		Eigenvector: 0.0		Betweenness: 2.0		Closeness: 0.0032573289
234	Cacna2d3	Degree: 2.0		Eigenvector: 0.0		Betweenness: 4.0		Closeness: 0.0032679392
235	Nptx2	Degree: 2.0		Eigenvector: 7.524919E-5		Betweenness: 2.0		Closeness: 0.025490358
236	Arc	Degree: 2.0		Eigenvector: 8.6867505E-5		Betweenness: 27.137062		Closeness: 0.025553804
237	Atp6v1b1	Degree: 2.0		Eigenvector: 2.4989998E-4		Betweenness: 544.0		Closeness: 0.025530504
238	Apoc2	Degree: 2.0		Eigenvector: 0.00764131		Betweenness: 0.0		Closeness: 0.026055325
239	Akr1d1	Degree: 2.0		Eigenvector: 2.4293E-5		Betweenness: 3204.0		Closeness: 0.02528113
240	Akr1c18	Degree: 2.0		Eigenvector: 9.620253E-7		Betweenness: 2680.0		Closeness: 0.024748895
241	Gla	Degree: 2.0		Eigenvector: 0.0		Betweenness: 4.0		Closeness: 0.0032679392
242	Cubn	Degree: 2.0		Eigenvector: 0.0044403886		Betweenness: 0.5		Closeness: 0.02596308
243	Wfdc18	Degree: 1.0		Eigenvector: 5.0781684E-5		Betweenness: 0.0		Closeness: 0.025328947
244	Vipr1	Degree: 1.0		Eigenvector: 0.0		Betweenness: 0.0		Closeness: 0.0032679045
245	Zcchc12	Degree: 1.0		Eigenvector: 4.0637606E-6		Betweenness: 0.0		Closeness: 0.02485274
246	Trim2	Degree: 1.0		Eigenvector: 2.5347229E-6		Betweenness: 0.0		Closeness: 0.025105966
247	Slc2a12	Degree: 1.0		Eigenvector: 3.6985246E-5		Betweenness: 0.0		Closeness: 0.025562288
248	Sdf2l1	Degree: 1.0		Eigenvector: 1.5495671E-9		Betweenness: 0.0		Closeness: 0.023726985
249	Pglyrp1	Degree: 1.0		Eigenvector: 9.459144E-4		Betweenness: 0.0		Closeness: 0.025802128
250	Pdzrn4	Degree: 1.0		Eigenvector: 0.010264945		Betweenness: 0.0		Closeness: 0.026421892
251	Nfkbid	Degree: 1.0		Eigenvector: 0.010264945		Betweenness: 0.0		Closeness: 0.026421892
252	Plac8	Degree: 1.0		Eigenvector: 0.0031473904		Betweenness: 0.0		Closeness: 0.025797805
253	Paqr7	Degree: 1.0		Eigenvector: 0.0		Betweenness: 0.0		Closeness: 0.0032467532
254	Mmd2	Degree: 1.0		Eigenvector: 0.0		Betweenness: 0.0		Closeness: 0.0032467532
255	Lrmda	Degree: 1.0		Eigenvector: 0.0		Betweenness: 0.0		Closeness: 0.0032572947
256	Lgr6	Degree: 1.0		Eigenvector: 4.3691856E-5		Betweenness: 0.0		Closeness: 0.02549669
257	Klk6	Degree: 1.0		Eigenvector: 0.0		Betweenness: 0.0		Closeness: 0.0032679045
258	Klk13	Degree: 1.0		Eigenvector: 0.0016910437		Betweenness: 0.0		Closeness: 0.025941212
259	Klhl38	Degree: 1.0		Eigenvector: 4.0637606E-6		Betweenness: 0.0		Closeness: 0.02485274
260	Sh2d3c	Degree: 1.0		Eigenvector: 0.003570875		Betweenness: 0.0		Closeness: 0.02601571
261	Serpina3b	Degree: 1.0		Eigenvector: 0.0020916294		Betweenness: 0.0		Closeness: 0.02595214
262	Mlc1	Degree: 1.0		Eigenvector: 3.0562783E-6		Betweenness: 0.0		Closeness: 0.024935232
263	Hdc	Degree: 1.0		Eigenvector: 0.010264945		Betweenness: 0.0		Closeness: 0.026421892
264	P2ry14	Degree: 1.0		Eigenvector: 0.0		Betweenness: 0.0		Closeness: 0.0032572947
265	Retnlg	Degree: 1.0		Eigenvector: 0.0		Betweenness: 0.0		Closeness: 0.0032467532
266	Gm5483	Degree: 1.0		Eigenvector: 0.0		Betweenness: 0.0		Closeness: 0.0032467532
267	Gm10722	Degree: 1.0		Eigenvector: 1.529933E-4		Betweenness: 0.0		Closeness: 0.025551684
268	Glipr2	Degree: 1.0		Eigenvector: 0.0		Betweenness: 0.0		Closeness: 0.0032679045
269	Slc6a11	Degree: 1.0		Eigenvector: 0.0018266515		Betweenness: 0.0		Closeness: 0.02604431
270	Gcnt1	Degree: 1.0		Eigenvector: 0.0		Betweenness: 0.0		Closeness: 0.0032467532
271	Galnt6	Degree: 1.0		Eigenvector: 0.0		Betweenness: 0.0		Closeness: 0.0032467532
272	Gabrp	Degree: 1.0		Eigenvector: 0.0		Betweenness: 0.0		Closeness: 0.0032467532
273	Gabra4	Degree: 1.0		Eigenvector: 0.0		Betweenness: 0.0		Closeness: 0.0032467532
274	Ncald	Degree: 1.0		Eigenvector: 0.0		Betweenness: 0.0		Closeness: 0.0032679045
275	Glt8d2	Degree: 1.0		Eigenvector: 0.0		Betweenness: 0.0		Closeness: 0.0032679045
276	Frem2	Degree: 1.0		Eigenvector: 0.0		Betweenness: 0.0		Closeness: 0.0032467532
277	Frem1	Degree: 1.0		Eigenvector: 0.0		Betweenness: 0.0		Closeness: 0.0032467532
278	Fhl2	Degree: 1.0		Eigenvector: 1.560397E-4		Betweenness: 0.0		Closeness: 0.025492469
279	Fabp5	Degree: 1.0		Eigenvector: 6.052324E-11		Betweenness: 0.0		Closeness: 0.023247037
280	Dynlt1b	Degree: 1.0		Eigenvector: 8.391714E-5		Betweenness: 0.0		Closeness: 0.025547445
281	Dnmt3l	Degree: 1.0		Eigenvector: 0.0		Betweenness: 0.0		Closeness: 0.0032572947
282	Dhrs9	Degree: 1.0		Eigenvector: 6.052324E-11		Betweenness: 0.0		Closeness: 0.023247037
283	Degs2	Degree: 1.0		Eigenvector: 0.0		Betweenness: 0.0		Closeness: 0.0032678698
284	Cybrd1	Degree: 1.0		Eigenvector: 0.005118178		Betweenness: 0.0		Closeness: 0.026055325
285	Glrx	Degree: 1.0		Eigenvector: 0.0062080673		Betweenness: 0.0		Closeness: 0.026084011
286	Spink7	Degree: 1.0		Eigenvector: 1.368119E-4		Betweenness: 0.0		Closeness: 0.025515698
287	Tcf23	Degree: 1.0		Eigenvector: 1.368119E-4		Betweenness: 0.0		Closeness: 0.025515698
288	Fam57b	Degree: 1.0		Eigenvector: 0.00514907		Betweenness: 0.0		Closeness: 0.025989369
289	Clec11a	Degree: 1.0		Eigenvector: 0.0040715667		Betweenness: 0.0		Closeness: 0.025971835
290	Cemip	Degree: 1.0		Eigenvector: 0.0		Betweenness: 0.0		Closeness: 0.0032679045
291	Cela1	Degree: 1.0		Eigenvector: 7.6030585E-4		Betweenness: 0.0		Closeness: 0.02599595
292	Cd5l	Degree: 1.0		Eigenvector: 7.6245586E-4		Betweenness: 0.0		Closeness: 0.025647432
293	Milr1	Degree: 1.0		Eigenvector: 0.0012040095		Betweenness: 0.0		Closeness: 0.025675226
294	Cd101	Degree: 1.0		Eigenvector: 0.0050067343		Betweenness: 0.0		Closeness: 0.02611276
295	Ear2	Degree: 1.0		Eigenvector: 0.003301323		Betweenness: 0.0		Closeness: 0.02599156
296	Kcnd3	Degree: 1.0		Eigenvector: 0.0		Betweenness: 0.0		Closeness: 0.0032678698
297	C2	Degree: 1.0		Eigenvector: 3.5518135E-6		Betweenness: 0.0		Closeness: 0.02500406
298	Gm10717	Degree: 1.0		Eigenvector: 0.0		Betweenness: 0.0		Closeness: 0.0032572947
299	Gm10800	Degree: 1.0		Eigenvector: 0.0		Betweenness: 0.0		Closeness: 0.0032572947
300	Bex2	Degree: 1.0		Eigenvector: 0.0		Betweenness: 0.0		Closeness: 0.0032572947
301	Bcl2l14	Degree: 1.0		Eigenvector: 6.4611156E-4		Betweenness: 0.0		Closeness: 0.025856279
302	B3gnt5	Degree: 1.0		Eigenvector: 1.9685505E-5		Betweenness: 0.0		Closeness: 0.025196334
303	Gm21847	Degree: 1.0		Eigenvector: 9.776217E-6		Betweenness: 0.0		Closeness: 0.024967575
304	Arfgef3	Degree: 1.0		Eigenvector: 0.0		Betweenness: 0.0		Closeness: 0.0032678698
305	Gm4070	Degree: 1.0		Eigenvector: 5.420042E-4		Betweenness: 0.0		Closeness: 0.02554109
306	Apol8	Degree: 1.0		Eigenvector: 0.0020916294		Betweenness: 0.0		Closeness: 0.02595214
307	Akr1b8	Degree: 1.0		Eigenvector: 0.0		Betweenness: 0.0		Closeness: 0.0032678698
308	Rab11fip4	Degree: 1.0		Eigenvector: 3.3033086E-4		Betweenness: 0.0		Closeness: 0.025634624
309	Ada	Degree: 1.0		Eigenvector: 0.01026494		Betweenness: 0.0		Closeness: 0.026421892

## Sheet: Figure 4C-go
Category	Term	Count	%	PValue	Genes	List Total	Pop Hits	Pop Total	Fold Enrichment	Bonferroni	Benjamini	FDR		(https://david-d.ncifcrf.gov
GOTERM_BP_DIRECT	GO:0002376~immune system process	29	26.6055	8.67237e-21	IFITM3, CD84, CLEC4N, HP, IFIT1, SAMHD1, CLEC5A, NLRP3, CD14, SLC15A3, OASL1, HERC6, HAVCR2, OASL2, FCER1G, RSAD2, LY86, BST2, CLEC4D, TYROBP, OAS2, OAS3, IRF7, LCN2, TLR8, TLR7, CLEC4E, S100A9, S100A8	106	526	20094	10.4514	9.42687e-18	9.42687e-18	8.64636e-18
GOTERM_BP_DIRECT	GO:0045087~innate immune response	31	28.4404	1.88739e-19	IFITM3, CD84, CLEC4N, OAS1A, TREM2, IFIT1, SAMHD1, OAS1G, CLEC5A, NLRP3, CD14, SLC15A3, OASL1, HERC6, HAVCR2, OASL2, FCER1G, RSAD2, LY86, CYBB, BST2, CLEC4D, OAS2, OAS3, IRF7, LCN2, TLR8, TLR7, CLEC4E, S100A9, S100A8	106	710	20094	8.27683	2.05159e-16	9.83218e-17	9.01811e-17
GOTERM_BP_DIRECT	GO:0006954~inflammatory response	25	22.9358	2.71357e-19	NCF1, C5AR1, FPR3, CXCL3, PTGS2, THBS1, CXCL2, TNF, CCL6, CCL4, CCL3, NLRP3, CD14, HAVCR2, CCR1, SLC11A1, LY86, CYBB, IL1B, TLR8, ADAM8, CHIL3, TLR7, S100A9, S100A8	106	390	20094	12.1517	2.94965e-16	9.83218e-17	9.01811e-17
GOTERM_BP_DIRECT	GO:0009615~response to virus	15	13.7615	1.18525e-16	IFITM3, RSAD2, OAS1A, ISG15, IFIT1, TNF, OAS1G, BST2, OAS2, OAS3, LCN2, TLR8, IFI27L2A, OASL1, OASL2	106	99	20094	28.7221	1.20681e-13	3.22092e-14	2.95424e-14
GOTERM_BP_DIRECT	GO:0045071~negative regulation of viral genome replication	11	10.0917	8.45077e-14	IFITM3, BST2, RSAD2, OAS2, OAS3, OAS1A, ISG15, TNF, OASL1, OAS1G, OASL2	106	50	20094	41.7045	9.18384e-11	1.8372e-11	1.68508e-11
GOTERM_BP_DIRECT	GO:0030593~neutrophil chemotaxis	12	11.0092	4.14939e-13	FCER1G, CCL6, IL1B, C5AR1, CXCR2, CCL4, SPP1, CCL3, CXCL3, CXCL2, S100A9, S100A8	106	81	20094	28.0839	4.50986e-10	7.51731e-11	6.8949e-11
GOTERM_BP_DIRECT	GO:0032760~positive regulation of tumor necrosis factor production	13	11.9266	1.17213e-12	CD84, FCER1G, CYBB, OAS1A, THBS1, OAS1G, TYROBP, OAS2, OAS3, CCL4, CCL3, CD14, HAVCR2	106	118	20094	20.8844	1.27415e-09	1.82015e-10	1.66944e-10
GOTERM_BP_DIRECT	GO:0051607~defense response to virus	16	14.6789	1.65674e-12	IFITM3, RSAD2, OAS1A, ISG15, SAMHD1, IFIT1, OAS1G, BST2, OAS2, OAS3, IRF7, TLR8, NLRP3, TLR7, OASL1, OASL2	106	237	20094	12.7977	1.80093e-09	2.2511e-10	2.06471e-10
GOTERM_BP_DIRECT	GO:0006955~immune response	20	18.3486	9.7718e-12	CCR1, IL10, CSF3, CLEC4N, OSM, LY86, IFI44, CXCL3, THBS1, TNF, CXCL2, CLEC4D, CCL6, IL1B, CCL4, CXCR2, CCL3, TLR8, TLR7, CLEC4E	106	494	20094	7.67474	1.0622e-08	1.18022e-09	1.0825e-09
GOTERM_BP_DIRECT	GO:0045109~intermediate filament organization	10	9.17431	1.16605e-10	KRT19, KRT4, KRT15, GM5414, KRT77, KRT32, KRT75, KRT6B, KRT84, GFAP	106	71	20094	26.6994	1.2675e-07	1.2675e-08	1.16255e-08
GOTERM_BP_DIRECT	GO:0006935~chemotaxis	11	10.0917	2.41386e-09	CCR1, CCL6, C5AR1, CXCR2, CCL4, CCL3, FPR3, CXCL3, CXCL2, S100A9, S100A8	106	136	20094	15.3325	2.62386e-06	2.38533e-07	2.18783e-07
GOTERM_BP_DIRECT	GO:0060700~regulation of ribonuclease activity	6	5.50459	2.72243e-09	OAS2, OAS3, OAS1A, OASL1, OAS1G, OASL2	106	12	20094	94.783	2.95928e-06	2.46607e-07	2.26189e-07
GOTERM_BP_DIRECT	GO:0032728~positive regulation of interferon-beta production	8	7.33945	6.23172e-09	OAS2, OAS3, IRF7, OAS1A, TLR8, ISG15, TLR7, OAS1G	106	49	20094	30.9496	6.77386e-06	5.21068e-07	4.77925e-07
GOTERM_BP_DIRECT	GO:0042742~defense response to bacterium	15	13.7615	1.79507e-08	IL10, FCER1G, NCF1, SLC11A1, HP, OAS1A, TREM2, ISG15, TNF, OAS1G, CLEC4D, OAS2, OAS3, LCN2, CLEC4E	106	394	20094	7.21698	1.95123e-05	1.39375e-06	1.27835e-06
GOTERM_BP_DIRECT	GO:0009617~response to bacterium	13	11.9266	3.84631e-08	NCF1, SLFN4, SAA3, SLC11A1, HP, IFI44, ISG15, IFIT1, OAS2, RGS1, LCN2, CD14, HERC6	106	290	20094	8.49779	4.18085e-05	2.78729e-06	2.55652e-06
GOTERM_BP_DIRECT	GO:0001819~positive regulation of cytokine production	8	7.33945	1.84997e-07	IL10, CLEC4N, SLC11A1, CLEC5A, CD14, CLEC4E, TNF, HAVCR2	106	79	20094	19.1966	0.000201072	1.25683e-05	1.15277e-05
GOTERM_BP_DIRECT	GO:0032729~positive regulation of interferon-gamma production	8	7.33945	3.60398e-07	IL1B, SLC11A1, TLR8, ISG15, TLR7, CD14, TNF, HAVCR2	106	87	20094	17.4314	0.000391676	2.30443e-05	2.11363e-05
GOTERM_BP_DIRECT	GO:0050729~positive regulation of inflammatory response	8	7.33945	8.72336e-07	IL1B, OSM, CCL3, NLRP3, ADAM8, TNF, S100A9, S100A8	106	99	20094	15.3185	0.00094778	5.26794e-05	4.83177e-05
GOTERM_BP_DIRECT	GO:0031663~lipopolysaccharide-mediated signaling pathway	6	5.50459	1.76931e-06	IL1B, LY86, CCL3, TREM2, CD14, TNF	106	39	20094	29.164	0.00192139	0.000101223	9.28422e-05
GOTERM_BP_DIRECT	GO:0030595~leukocyte chemotaxis	5	4.58716	2.03593e-06	CCR1, CCL4, CCL3, CXCL2, S100A9	106	18	20094	52.6572	0.00221061	0.000110653	0.000101491
GOTERM_BP_DIRECT	GO:0071639~positive regulation of monocyte chemotactic protein-1 production	5	4.58716	3.19773e-06	CD84, IL1B, OAS3, OAS1A, OAS1G	106	20	20094	47.3915	0.0034699	0.00016552	0.000151816
GOTERM_BP_DIRECT	GO:0070098~chemokine-mediated signaling pathway	6	5.50459	5.622e-06	CCR1, CCL6, CCL4, CCL3, CXCL3, CXCL2	106	49	20094	23.2122	0.00609249	0.000277778	0.000254779
GOTERM_BP_DIRECT	GO:0031424~keratinization	7	6.42202	7.69129e-06	KRT4, GM5414, KRT77, KRT75, CNFN, KRT6B, KRT84	106	90	20094	14.744	0.00832561	0.000363497	0.000333401
GOTERM_BP_DIRECT	GO:0060339~negative regulation of type I interferon-mediated signaling pathway	5	4.58716	8.1829e-06	OAS3, OAS1A, ISG15, SAMHD1, OAS1G	106	25	20094	37.9132	0.00885541	0.000370617	0.000339931
GOTERM_BP_DIRECT	GO:0060337~type I interferon signaling pathway	5	4.58716	1.12617e-05	IFITM3, OAS2, IRF7, OAS1A, OAS1G	106	27	20094	35.1048	0.0121669	0.000475911	0.000436507
GOTERM_BP_DIRECT	GO:0045730~respiratory burst	4	3.66972	1.13833e-05	NCF1, NCF2, SLC11A1, CYBB	106	9	20094	84.2516	0.0122975	0.000475911	0.000436507
GOTERM_BP_DIRECT	GO:1901224~positive regulation of NIK/NF-kappaB signaling	6	5.50459	3.05017e-05	IL1B, TLR7, TREM2, CD14, TNF, HAVCR2	106	69	20094	16.484	0.0326122	0.00122797	0.0011263
GOTERM_BP_DIRECT	GO:0070374~positive regulation of ERK1 and ERK2 cascade	9	8.25688	3.26697e-05	CCR1, CCL6, IL1B, C5AR1, ALOX15, CCL4, CCL3, TREM2, HAVCR2	106	235	20094	7.25998	0.0348894	0.00126829	0.00116328
GOTERM_BP_DIRECT	GO:0007204~positive regulation of cytosolic calcium ion concentration	8	7.33945	4.17137e-05	CCR1, IL1B, C5AR1, CXCR2, CCL3, FPR3, CXCL3, CXCL2	106	178	20094	8.51982	0.0443311	0.00156355	0.00143409
GOTERM_BP_DIRECT	GO:0032496~response to lipopolysaccharide	8	7.33945	5.70324e-05	VCAM1, NCF2, IL1B, SLC11A1, PTGS2, TNF, S100A9, S100A8	106	187	20094	8.10978	0.0601133	0.00206647	0.00189538
GOTERM_BP_DIRECT	GO:0034138~toll-like receptor 3 signaling pathway	4	3.66972	8.93865e-05	OAS1A, TNF, HAVCR2, OAS1G	106	17	20094	44.6038	0.0925959	0.00313429	0.00287478
GOTERM_BP_DIRECT	GO:0002523~leukocyte migration involved in inflammatory response	4	3.66972	0.000148154	NLRP3, ADAM8, S100A9, S100A8	106	20	20094	37.9132	0.148755	0.00503261	0.00461592
GOTERM_BP_DIRECT	GO:0002292~T cell differentiation involved in immune response	3	2.75229	0.000161172	CLEC4D, FCER1G, CLEC4E	106	4	20094	142.175	0.160718	0.00530891	0.00486935
GOTERM_BP_DIRECT	GO:0071222~cellular response to lipopolysaccharide	9	8.25688	0.000167224	IL10, IL1B, CMPK2, NLRP3, CD14, CXCL3, CXCL2, TNF, HAVCR2	106	297	20094	5.74443	0.166222	0.00534626	0.00490361
GOTERM_BP_DIRECT	GO:0032722~positive regulation of chemokine production	5	4.58716	0.000182106	IL1B, TLR7, CHIL3, TNF, HAVCR2	106	54	20094	17.5524	0.179603	0.00565569	0.00518742
GOTERM_BP_DIRECT	GO:0030282~bone mineralization	5	4.58716	0.000256881	MMP13, COL1A2, ALOX15, SPP1, PTGS2	106	59	20094	16.0649	0.243661	0.00761108	0.00698091
GOTERM_BP_DIRECT	GO:0006164~purine nucleotide biosynthetic process	4	3.66972	0.000259071	OAS2, OAS3, OAS1A, OASL2	106	24	20094	31.5943	0.24546	0.00761108	0.00698091
GOTERM_BP_DIRECT	GO:0070106~interleukin-27-mediated signaling pathway	3	2.75229	0.000267703	OAS2, OASL1, OASL2	106	5	20094	113.74	0.252508	0.00765771	0.00702367
GOTERM_BP_DIRECT	GO:0032757~positive regulation of interleukin-8 production	5	4.58716	0.000292197	IL1B, TLR8, TLR7, CD14, TNF	106	61	20094	15.5382	0.272153	0.00794795	0.00728989
GOTERM_BP_DIRECT	GO:0032755~positive regulation of interleukin-6 production	6	5.50459	0.000292473	TYROBP, FCER1G, IL1B, TLR8, TLR7, TNF	106	111	20094	10.2468	0.272371	0.00794795	0.00728989
GOTERM_BP_DIRECT	GO:0032731~positive regulation of interleukin-1 beta production	5	4.58716	0.000395558	TYROBP, CCL3, TLR8, NLRP3, TNF	106	66	20094	14.3611	0.349528	0.0103571	0.00949959
GOTERM_BP_DIRECT	GO:0038094~Fc-gamma receptor signaling pathway	3	2.75229	0.000400183	CLEC4D, FCER1G, CLEC4E	106	6	20094	94.783	0.352791	0.0103571	0.00949959
GOTERM_BP_DIRECT	GO:0050766~positive regulation of phagocytosis	5	4.58716	0.000418995	FCER1G, IL1B, SLC11A1, TREM2, TNF	106	67	20094	14.1467	0.365896	0.0105918	0.00971483
GOTERM_BP_DIRECT	GO:0031622~positive regulation of fever generation	3	2.75229	0.000558345	IL1B, PTGS2, TNF	106	7	20094	81.2426	0.455066	0.0135337	0.0124132
GOTERM_BP_DIRECT	GO:0048247~lymphocyte chemotaxis	4	3.66972	0.000560275	CCL6, CCL4, CCL3, ADAM8	106	31	20094	24.4601	0.456208	0.0135337	0.0124132
GOTERM_BP_DIRECT	GO:0045672~positive regulation of osteoclast differentiation	4	3.66972	0.000615894	CCR1, CCL3, TREM2, TNF	106	32	20094	23.6958	0.488129	0.0142442	0.0130648
GOTERM_BP_DIRECT	GO:0034341~response to interferon-gamma	4	3.66972	0.000615894	IFITM3, BST2, SP100, SLC11A1	106	32	20094	23.6958	0.488129	0.0142442	0.0130648
GOTERM_BP_DIRECT	GO:0014068~positive regulation of phosphatidylinositol 3-kinase signaling	5	4.58716	0.00074624	CSF3, NCF1, OSM, TREM2, TNF	106	78	20094	12.1517	0.555794	0.0168992	0.0155
GOTERM_BP_DIRECT	GO:0032635~interleukin-6 production	4	3.66972	0.000873253	FCER1G, IL1B, TLR7, TNF	106	36	20094	21.0629	0.61312	0.019372	0.017768
GOTERM_BP_DIRECT	GO:0071347~cellular response to interleukin-1	5	4.58716	0.000900543	CCL6, SAA3, CCL4, CCL3, CXCL2	106	82	20094	11.5589	0.624438	0.0195778	0.0179568
GOTERM_BP_DIRECT	GO:0043525~positive regulation of neuron apoptotic process	5	4.58716	0.000985555	NCF2, IL1B, LCN2, CCL3, TNF	106	84	20094	11.2837	0.657618	0.0210059	0.0192666
GOTERM_BP_DIRECT	GO:0071356~cellular response to tumor necrosis factor	6	5.50459	0.00101933	COL1A1, VCAM1, CCL6, CCL4, CCL3, THBS1	106	146	20094	7.79039	0.669971	0.021127	0.0193777
GOTERM_BP_DIRECT	GO:0060326~cell chemotaxis	5	4.58716	0.00103011	CCR1, VCAM1, CCL6, SAA3, CXCR2	106	85	20094	11.1509	0.67382	0.021127	0.0193777
GOTERM_BP_DIRECT	GO:0071659~negative regulation of IP-10 production	3	2.75229	0.00118426	OAS3, OAS1A, OAS1G	106	10	20094	56.8698	0.724192	0.0229873	0.021084
GOTERM_BP_DIRECT	GO:0002544~chronic inflammatory response	3	2.75229	0.00118426	VCAM1, THBS1, S100A9	106	10	20094	56.8698	0.724192	0.0229873	0.021084
GOTERM_BP_DIRECT	GO:2000342~negative regulation of chemokine (C-X-C motif) ligand 2 production	3	2.75229	0.00118426	OAS3, OAS1A, OAS1G	106	10	20094	56.8698	0.724192	0.0229873	0.021084
GOTERM_BP_DIRECT	GO:0042493~response to drug	8	7.33945	0.0015688	IL10, GNAO1, COL1A1, LCN2, CCL3, CYBB, PTGS2, THBS1	106	324	20094	4.68064	0.818523	0.0299173	0.0274402
GOTERM_BP_DIRECT	GO:0002237~response to molecule of bacterial origin	3	2.75229	0.0017251	IL10, CD14, CXCL2	106	12	20094	47.3915	0.846921	0.0323307	0.0296538
GOTERM_BP_DIRECT	GO:0030316~osteoclast differentiation	4	3.66972	0.00190233	TYROBP, FCER1G, TREM2, TNF	106	47	20094	16.1333	0.87379	0.0350481	0.0321462
GOTERM_BP_DIRECT	GO:0035456~response to interferon-beta	3	2.75229	0.00203181	IFITM3, BST2, XAF1	106	13	20094	43.746	0.89039	0.0368097	0.0337619
GOTERM_BP_DIRECT	GO:0034116~positive regulation of heterotypic cell-cell adhesion	3	2.75229	0.00236238	IL1B, ALOX15, TNF	106	14	20094	40.6213	0.923537	0.0414179	0.0379886
GOTERM_BP_DIRECT	GO:0097242~beta-amyloid clearance	3	2.75229	0.00236238	MSR1, C5AR1, TREM2	106	14	20094	40.6213	0.923537	0.0414179	0.0379886
GOTERM_BP_DIRECT	GO:0007229~integrin-mediated signaling pathway	5	4.58716	0.00240535	TYROBP, FCER1G, PLEK, ISG15, ADAM8	106	107	20094	8.85823	0.927034	0.0415018	0.0380656
GOTERM_BP_DIRECT	GO:0000165~MAPK cascade	5	4.58716	0.00265899	IL1B, SLC11A1, CCL3, TLR7, TNF	106	110	20094	8.61664	0.944655	0.0451612	0.041422
GOTERM_BP_DIRECT	GO:0001775~cell activation	3	2.75229	0.00271655	CCL3, TIMP1, TNF	106	15	20094	37.9132	0.948021	0.0454291	0.0416677
GOTERM_BP_DIRECT	GO:0030198~extracellular matrix organization	6	5.50459	0.00281349	COL1A1, MMP13, COL1A2, TNF, MMP10, GFAP	106	184	20094	6.1815	0.953233	0.04598	0.042173
GOTERM_BP_DIRECT	GO:0032715~negative regulation of interleukin-6 production	4	3.66972	0.00283409	IL10, CD84, TNF, HAVCR2	106	54	20094	14.0419	0.954272	0.04598	0.042173
GOTERM_BP_DIRECT	GO:0051044~positive regulation of membrane protein ectodomain proteolysis	3	2.75229	0.00309408	IL1B, ADAM8, TNF	106	16	20094	35.5436	0.965558	0.0487429	0.0447071
GOTERM_BP_DIRECT	GO:0048143~astrocyte activation	3	2.75229	0.00309408	IL1B, C5AR1, TREM2	106	16	20094	35.5436	0.965558	0.0487429	0.0447071
GOTERM_BP_DIRECT	GO:0007568~aging	6	5.50459	0.00330194	IL10, GNAO1, VCAM1, TIMP1, IFI27L2A, PTGS2	106	191	20094	5.95495	0.972543	0.0512744	0.047029
GOTERM_BP_DIRECT	GO:0050830~defense response to Gram-positive bacterium	6	5.50459	0.00337639	NCF1, IL1B, C5AR1, NLRP3, TNF, HAVCR2	106	192	20094	5.92394	0.974685	0.0516921	0.0474121
GOTERM_BP_DIRECT	GO:0002526~acute inflammatory response	3	2.75229	0.00391818	VCAM1, HP, NLRP3	106	18	20094	31.5943	0.985982	0.0575549	0.0527895
GOTERM_BP_DIRECT	GO:0014002~astrocyte development	3	2.75229	0.00391818	S100A9, S100A8, GFAP	106	18	20094	31.5943	0.985982	0.0575549	0.0527895
GOTERM_BP_DIRECT	GO:0061760~antifungal innate immune response	3	2.75229	0.00391818	CLEC4D, CLEC4N, CLEC4E	106	18	20094	31.5943	0.985982	0.0575549	0.0527895
GOTERM_BP_DIRECT	GO:0032695~negative regulation of interleukin-12 production	3	2.75229	0.00436427	IL10, TLR8, THBS1	106	19	20094	29.9315	0.991386	0.0632528	0.0580157
GOTERM_BP_DIRECT	GO:0007249~I-kappaB kinase/NF-kappaB signaling	4	3.66972	0.00458448	IL1B, TLR8, TLR7, TNF	106	64	20094	11.8479	0.993227	0.0655701	0.0601412
GOTERM_BP_DIRECT	GO:0051091~positive regulation of sequence-specific DNA binding transcription factor activity	5	4.58716	0.00470257	IL10, CSF3, SP100, IL1B, TNF	106	129	20094	7.34752	0.994046	0.0663856	0.0608891
GOTERM_BP_DIRECT	GO:0051897~positive regulation of protein kinase B signaling	5	4.58716	0.00483268	CSF3, OSM, ADAM8, THBS1, TNF	106	130	20094	7.291	0.994835	0.0664959	0.0609903
GOTERM_BP_DIRECT	GO:0042554~superoxide anion generation	3	2.75229	0.00483273	NCF1, NCF2, CYBB	106	20	20094	28.4349	0.994835	0.0664959	0.0609903
GOTERM_BP_DIRECT	GO:0050995~negative regulation of lipid catabolic process	3	2.75229	0.00532331	HCAR2, IL1B, TNF	106	21	20094	27.0809	0.996978	0.0697161	0.0639439
GOTERM_BP_DIRECT	GO:0035457~cellular response to interferon-alpha	3	2.75229	0.00532331	OAS1A, IFIT1, OAS1G	106	21	20094	27.0809	0.996978	0.0697161	0.0639439
GOTERM_BP_DIRECT	GO:0045088~regulation of innate immune response	3	2.75229	0.00532331	IRF7, TREM2, SAMHD1	106	21	20094	27.0809	0.996978	0.0697161	0.0639439
GOTERM_BP_DIRECT	GO:0006801~superoxide metabolic process	3	2.75229	0.00532331	NCF1, NCF2, CYBB	106	21	20094	27.0809	0.996978	0.0697161	0.0639439
GOTERM_BP_DIRECT	GO:0034142~toll-like receptor 4 signaling pathway	3	2.75229	0.00583578	OAS1A, CD14, OAS1G	106	22	20094	25.8499	0.998274	0.0755178	0.0692652
GOTERM_BP_DIRECT	GO:0051384~response to glucocorticoid	4	3.66972	0.00612565	IL10, PTGS2, CXCL2, TNF	106	71	20094	10.6798	0.998743	0.0783362	0.0718502
GOTERM_BP_DIRECT	GO:2000010~positive regulation of protein localization to cell surface	3	2.75229	0.0063699	TYROBP, FCER1G, TNF	106	23	20094	24.726	0.999038	0.0795871	0.0729976
GOTERM_BP_DIRECT	GO:0043032~positive regulation of macrophage activation	3	2.75229	0.0063699	IL10, THBS1, HAVCR2	106	23	20094	24.726	0.999038	0.0795871	0.0729976
GOTERM_BP_DIRECT	GO:0043277~apoptotic cell clearance	3	2.75229	0.00692543	TYROBP, ALOX15, TREM2	106	24	20094	23.6958	0.999476	0.0845836	0.0775804
GOTERM_BP_DIRECT	GO:0044419~interspecies interaction between organisms	3	2.75229	0.00692543	CLEC4D, CLEC4N, CLEC4E	106	24	20094	23.6958	0.999476	0.0845836	0.0775804
GOTERM_BP_DIRECT	GO:0043066~negative regulation of apoptotic process	10	9.17431	0.00749661	IL10, CLEC5A, CXCR2, PLAUR, SPP1, TREM2, TIMP1, PTGS2, THBS1, TNF	106	657	20094	2.88533	0.99972	0.0905424	0.0830458
GOTERM_BP_DIRECT	GO:0032727~positive regulation of interferon-alpha production	3	2.75229	0.00809979	IRF7, TLR8, TLR7	106	26	20094	21.873	0.999855	0.0967524	0.0887417
GOTERM_BP_DIRECT	GO:0006919~activation of cysteine-type endopeptidase activity involved in apoptotic process	4	3.66972	0.00851311	NLRP3, TNF, S100A9, S100A8	106	80	20094	9.4783	0.999908	0.098698	0.0905262
GOTERM_BP_DIRECT	GO:0050850~positive regulation of calcium-mediated signaling	3	2.75229	0.00871816	CCL4, CCL3, TREM2	106	27	20094	21.0629	0.999926	0.098698	0.0905262
GOTERM_BP_DIRECT	GO:0010575~positive regulation of vascular endothelial growth factor production	3	2.75229	0.00871816	IL1B, C5AR1, PTGS2	106	27	20094	21.0629	0.999926	0.098698	0.0905262
GOTERM_BP_DIRECT	GO:0032753~positive regulation of interleukin-4 production	3	2.75229	0.00871816	FCER1G, NLRP3, HAVCR2	106	27	20094	21.0629	0.999926	0.098698	0.0905262
GOTERM_BP_DIRECT	GO:0060252~positive regulation of glial cell proliferation	3	2.75229	0.00871816	IL1B, TNF, GFAP	106	27	20094	21.0629	0.999926	0.098698	0.0905262
GOTERM_BP_DIRECT	GO:0034097~response to cytokine	4	3.66972	0.00880746	GNAO1, SP100, TIMP1, PTGS2	106	81	20094	9.36129	0.999933	0.098698	0.0905262
GOTERM_BP_DIRECT	GO:0043406~positive regulation of MAP kinase activity	4	3.66972	0.00910772	IL1B, ADAM8, THBS1, TNF	106	82	20094	9.24712	0.999952	0.101021	0.0926571
GOTERM_BP_DIRECT	GO:0051092~positive regulation of NF-kappaB transcription factor activity	5	4.58716	0.00972653	CD84, IL1B, NLRP3, ADAM8, TNF	106	159	20094	5.9612	0.999976	0.106795	0.0979531
GOTERM_BP_DIRECT	GO:0090023~positive regulation of neutrophil chemotaxis	3	2.75229	0.0100161	IL1B, C5AR1, CXCR2	106	29	20094	19.6103	0.999982	0.108875	0.0998609
GOTERM_BP_DIRECT	GO:0045766~positive regulation of angiogenesis	5	4.58716	0.0101498	IL1B, C5AR1, CXCR2, CYBB, THBS1	106	161	20094	5.88714	0.999985	0.109236	0.100191
GOTERM_BP_DIRECT	GO:0001774~microglial cell activation	3	2.75229	0.0106953	C5AR1, TREM2, TNF	106	30	20094	18.9566	0.999992	0.113978	0.104541
GOTERM_BP_DIRECT	GO:0045089~positive regulation of innate immune response	3	2.75229	0.0113943	TLR8, ADAM8, HAVCR2	106	31	20094	18.3451	0.999996	0.120248	0.110292
GOTERM_BP_DIRECT	GO:0019722~calcium-mediated signaling	4	3.66972	0.0117254	CCR1, CXCR2, CCL3, TNF	106	90	20094	8.42516	0.999997	0.122553	0.112406
GOTERM_BP_DIRECT	GO:0051928~positive regulation of calcium ion transport	3	2.75229	0.0136078	CCR1, CCL4, CCL3	106	34	20094	16.7264	1	0.140873	0.12921
GOTERM_BP_DIRECT	GO:0002820~negative regulation of adaptive immune response	2	1.83486	0.0155953	ALOX15, SAMSN1	106	3	20094	126.377	1	0.156964	0.143968
GOTERM_BP_DIRECT	GO:0070488~neutrophil aggregation	2	1.83486	0.0155953	S100A9, S100A8	106	3	20094	126.377	1	0.156964	0.143968
GOTERM_BP_DIRECT	GO:0060559~positive regulation of calcidiol 1-monooxygenase activity	2	1.83486	0.0155953	IL1B, TNF	106	3	20094	126.377	1	0.156964	0.143968
GOTERM_BP_DIRECT	GO:0002548~monocyte chemotaxis	3	2.75229	0.0159918	CCL6, CCL4, CCL3	106	37	20094	15.3702	1	0.158028	0.144944
GOTERM_BP_DIRECT	GO:0010934~macrophage cytokine production	3	2.75229	0.0159918	IL1B, NLRP3, TLR7	106	37	20094	15.3702	1	0.158028	0.144944
GOTERM_BP_DIRECT	GO:0030855~epithelial cell differentiation	4	3.66972	0.016386	KRT19, KRT4, KRT15, KRT32	106	102	20094	7.43396	1	0.159032	0.145865
GOTERM_BP_DIRECT	GO:0050727~regulation of inflammatory response	4	3.66972	0.016386	ALOX15, NLRP3, TNF, S100A8	106	102	20094	7.43396	1	0.159032	0.145865
GOTERM_BP_DIRECT	GO:0033138~positive regulation of peptidyl-serine phosphorylation	4	3.66972	0.0168147	CSF3, OSM, PTGS2, TNF	106	103	20094	7.36179	1	0.161749	0.148357
GOTERM_BP_DIRECT	GO:0001818~negative regulation of cytokine production	3	2.75229	0.017673	SRGN, IL10, SLC11A1	106	39	20094	14.582	1	0.168514	0.154561
GOTERM_BP_DIRECT	GO:0043547~positive regulation of GTPase activity	5	4.58716	0.0182845	GNAO1, CCL6, RGS1, CCL4, CCL3	106	192	20094	4.93662	1	0.172829	0.158519
GOTERM_BP_DIRECT	GO:0071260~cellular response to mechanical stimulus	4	3.66972	0.0185925	COL1A1, TLR8, TLR7, PTGS2	106	107	20094	7.08658	1	0.174224	0.159799
GOTERM_BP_DIRECT	GO:0042060~wound healing	4	3.66972	0.019519	COL1A1, SLC11A1, ALOX15, CXCL2	106	109	20094	6.95655	1	0.179807	0.164919
GOTERM_BP_DIRECT	GO:0002244~hematopoietic progenitor cell differentiation	4	3.66972	0.019519	SAMD9L, PLEK, KRT75, HERC6	106	109	20094	6.95655	1	0.179807	0.164919
GOTERM_BP_DIRECT	GO:0030730~sequestering of triglyceride	2	1.83486	0.02074	IL1B, TNF	106	4	20094	94.783	1	0.18479	0.16949
GOTERM_BP_DIRECT	GO:0002790~peptide secretion	2	1.83486	0.02074	S100A9, S100A8	106	4	20094	94.783	1	0.18479	0.16949
GOTERM_BP_DIRECT	GO:0030886~negative regulation of myeloid dendritic cell activation	2	1.83486	0.02074	IL10, HAVCR2	106	4	20094	94.783	1	0.18479	0.16949
GOTERM_BP_DIRECT	GO:0002439~chronic inflammatory response to antigenic stimulus	2	1.83486	0.02074	IL10, TNF	106	4	20094	94.783	1	0.18479	0.16949
GOTERM_BP_DIRECT	GO:0006915~apoptotic process	9	8.25688	0.0209669	SRGN, HCAR2, NCF1, C5AR1, LCN2, XAF1, TNF, S100A9, S100A8	106	652	20094	2.61671	1	0.185293	0.169951
GOTERM_BP_DIRECT	GO:0032733~positive regulation of interleukin-10 production	3	2.75229	0.0212483	FCER1G, ISG15, TREM2	106	43	20094	13.2255	1	0.186265	0.170843
GOTERM_BP_DIRECT	GO:0050731~positive regulation of peptidyl-tyrosine phosphorylation	4	3.66972	0.0234771	CSF3, CLEC4N, OSM, TREM2	106	117	20094	6.48089	1	0.202537	0.185767
GOTERM_BP_DIRECT	GO:0001503~ossification	4	3.66972	0.0234771	COL1A1, RSAD2, ALOX15, SPP1	106	117	20094	6.48089	1	0.202537	0.185767
GOTERM_BP_DIRECT	GO:0010811~positive regulation of cell-substrate adhesion	3	2.75229	0.0241097	ALOX15, SPP1, THBS1	106	46	20094	12.363	1	0.206356	0.189271
GOTERM_BP_DIRECT	GO:0007166~cell surface receptor signaling pathway	5	4.58716	0.0255891	MS4A6B, FCER1G, CXCR2, MS4A6D, MS4A6C	106	213	20094	4.44991	1	0.20976	0.192392
GOTERM_BP_DIRECT	GO:0002719~negative regulation of cytokine production involved in immune response	2	1.83486	0.0258581	IL10, TNF	106	5	20094	75.8264	1	0.20976	0.192392
GOTERM_BP_DIRECT	GO:0002282~microglial cell activation involved in immune response	2	1.83486	0.0258581	TYROBP, TREM2	106	5	20094	75.8264	1	0.20976	0.192392
GOTERM_BP_DIRECT	GO:0034154~toll-like receptor 7 signaling pathway	2	1.83486	0.0258581	TLR7, HAVCR2	106	5	20094	75.8264	1	0.20976	0.192392
GOTERM_BP_DIRECT	GO:0034241~positive regulation of macrophage fusion	2	1.83486	0.0258581	TYROBP, TREM2	106	5	20094	75.8264	1	0.20976	0.192392
GOTERM_BP_DIRECT	GO:0002793~positive regulation of peptide secretion	2	1.83486	0.0258581	S100A9, S100A8	106	5	20094	75.8264	1	0.20976	0.192392
GOTERM_BP_DIRECT	GO:0006742~NADP catabolic process	2	1.83486	0.0258581	NCF1, NCF2	106	5	20094	75.8264	1	0.20976	0.192392
GOTERM_BP_DIRECT	GO:0045429~positive regulation of nitric oxide biosynthetic process	3	2.75229	0.0302719	IL1B, PTGS2, TNF	106	52	20094	10.9365	1	0.243745	0.223564
GOTERM_BP_DIRECT	GO:2000503~positive regulation of natural killer cell chemotaxis	2	1.83486	0.0309497	CCL4, CCL3	106	6	20094	63.1887	1	0.243785	0.2236
GOTERM_BP_DIRECT	GO:0070487~monocyte aggregation	2	1.83486	0.0309497	IL1B, THBS1	106	6	20094	63.1887	1	0.243785	0.2236
GOTERM_BP_DIRECT	GO:0018119~peptidyl-cysteine S-nitrosylation	2	1.83486	0.0309497	S100A9, S100A8	106	6	20094	63.1887	1	0.243785	0.2236
GOTERM_BP_DIRECT	GO:0007254~JNK cascade	3	2.75229	0.0313537	IL1B, TLR7, TNF	106	53	20094	10.7302	1	0.24519	0.224889
GOTERM_BP_DIRECT	GO:0030199~collagen fibril organization	3	2.75229	0.0324506	COL1A1, COL1A2, FMOD	106	54	20094	10.5314	1	0.251956	0.231095
[truncated: 127 more rows]

## Sheet: Figure 4D-KEGG
Category	Term	Count	%	PValue	Genes	List Total	Pop Hits	Pop Total	Fold Enrichment	Bonferroni	Benjamini	FDR		(https://david-d.ncifcrf.gov
[truncated: 51 more rows]

[truncated: 1 more sheets: Figure 5 ct]
